# Supplementary material for: Leveraging Metabolic Similarity in a ¹H NMR Database of Medicinal Plants: A Macroscopic Approach to Advancing Pharmacognostic Insights
Source: Research Square preprint supplement (doi:10.21203/rs.3.rs-6765662/v1), 2025-06-27
Supplement: Supplementary file 1 [file 0daeda2e2bd0b86e8d693eb4.docx]

Table 3. Medicinal plant samples analyzed by 1H NMR, including sample code, scientific name, used part, origin, and supplier information.

| **No.** | **Sample code** | **Family** | **Genus** | **Species** | **Used part** |
| --- | --- | --- | --- | --- | --- |
| 1 | NPL-KHU-001 | *Fabaceae* | *Pueraria* | *lobata* | Root |
| 2 | NPL-KHU-002 | *Zingiberaceae* | *Curcuma* | *longa* | Root |
| 3 | NPL-KHU-003 | *Zingiberaceae* | *Zingiber* | *officinale* | Root |
| 4 | NPL-KHU-004 | *Anacardiaceae* | *Rhus* | *verniciflua* | Rind |
| 5 | NPL-KHU-005 | *Nymphaeaceae* | *Euryale* | *ferox* | Seed |
| 6 | NPL-KHU-006 | *Lauraceae* | *Cinnamomum* | *cassia* | Rind |
| 7 | NPL-KHU-007 | *Lauraceae* | *Cinnamomum* | *cassia* | Rind |
| 8 | NPL-KHU-008 | *Zingiberaceae* | *Alpinia* | *officinarum* | Root |
| 9 | NPL-KHU-009 | *Fabaceae* | *Sophora* | *flavescens* | Root |
| 10 | NPL-KHU-010 | *Viscaceae* | *Viscum* | *coloratum* | Whole plant |
| 11 | NPL-KHU-011 | *Poaceae* | *Oryza* | *sativa* | Seed |
| 12 | NPL-KHU-012 | *Laminariaceae* | *Laminaria* | *japonica* | Whole plant |
| 13 | NPL-KHU-013 | *Lamiaceae* | *Agastache* | *rugosa* | Whole plant |
| 14 | NPL-KHU-014 | *Fabaceae* | *Sophora* | *japonica* | Flower and seed |
| 15 | NPL-KHU-015 | *Celastraceae* | *Euonymus* | *alatus* | Rind |
| 16 | NPL-KHU-016 | *Rosaceae* | *Rosa* | *laevigata* | Fruit |
| 17 | NPL-KHU-017 | *Balsaminaceae* | *Impatiens* | *balsamina* | Whole plant |
| 18 | NPL-KHU-018 | *Poaceae* | *Oryza* | *sativa* | Seed |
| 19 | NPL-KHU-019 | *Fabaceae* | *Vigna* | *radiatus* | Seed |
| 20 | NPL-KHU-020 | *Lamiaceae* | *Salvia* | *miltiorrhiza* | Root |
| 21 | NPL-KHU-021 | *Poaceae* | *Lophatherum* | *gracile* | Whole plant |
| 22 | NPL-KHU-022 | *Apiaceae* | *Angelica* | *gigas* | Root |
| 23 | NPL-KHU-023 | *Polygonaceae* | *Rheum* | *palmatum* | Root |
| 24 | NPL-KHU-024 | *Cucurbitaceae* | *Benincasa* | *cerifera* | Fruit |
| 25 | NPL-KHU-025 | *Fabaceae* | *Glycine* | *max* | Seed |
| 26 | NPL-KHU-026 | *Rosaceae* | *Rosa* | *rugosa* | Fruit |
| 27 | NPL-KHU-027 | *Malvaceae* | *Hibiscus* | *syriacus* | Flower |
| 28 | NPL-KHU-028 | *Paeoniaceae* | *Paeonia* | *suffruticosa* | Root |
| 29 | NPL-KHU-029 | *Cucurbitaceae* | *Momordica* | *cochinchinensis* | Fruit |
| 30 | NPL-KHU-030 | *Actinidiaceae* | *Actinidia* | *polygama* | Fruit |
| 31 | NPL-KHU-031 | *Lamiaceae* | *Mentha* | *arvensis* | Leaf |
| 32 | NPL-KHU-032 | *Lamiaceae* | *Scutellaria* | *barbata* | Whole plant |
| 33 | NPL-KHU-033 | *Araceae* | *Pinellia* | *ternata* | Root |
| 34 | NPL-KHU-034 | *Menispermaceae* | *Sinomenium* | *acutum* | Root |
| 35 | NPL-KHU-035 | *Ginkgoaceae* | *Ginkgo* | *biloba* | Leaf |
| 36 | NPL-KHU-036 | *Cupressaceae* | *Platycladus* | *orientalis* | Seed and leaf |
| 37 | NPL-KHU-037 | *Paeoniaceae* | *Paeonia* | *japonica* | Root |
| 38 | NPL-KHU-038 | *Rubiaceae* | *Oldenlandia* | *herbacea* | Whole plant |
| 39 | NPL-KHU-039 | *Poaceae* | *Triticum* | *aestivum* | Seed |
| 40 | NPL-KHU-040 | *Lemnaceae* | *Spirodela* | *polyrhiza* | Whole plant |
| 41 | NPL-KHU-041 | *Dioscoreaceae* | *Dioscorea* | *tokoro* | Root |
| 42 | NPL-KHU-042 | *Arecaceae* | *Areca* | *catechu* | Seed |
| 43 | NPL-KHU-043 | *Cucurbitaceae* | *Cucumis* | *melo* | Fruit |
| 44 | NPL-KHU-044 | *Combretaceae* | *Quisqualis* | *indica* | Flower |
| 45 | NPL-KHU-045 | *Apiaceae* | *Aegopodium* | *podagraria* | Whole plant |
| 46 | NPL-KHU-046 | *Cornaceae* | *Cornus* | *officinalis* | Fruit |
| 47 | NPL-KHU-047 | *Lythraceae* | *Punica* | *granatum* | Fruit |
| 48 | NPL-KHU-048 | *Zingiberaceae* | *Elettaria* | *cardamomum* | Seed |
| 49 | NPL-KHU-049 | *Apiaceae* | *Anethum* | *graveolens* | Whole plant |
| 50 | NPL-KHU-050 | *Ebenaceae* | *Diospyros* | *kaki* | Fruit |
| 51 | NPL-KHU-051 | *Apiaceae* | *Bupleurum* | *falcatum* | Root |
| 52 | NPL-KHU-052 | *Polygonaceae* | *Rumex* | *japonicus* | Whole plant |
| 53 | NPL-KHU-053 | *Primulaceae* | *Lysimachia* | *foenum-graecum* | Whole plant |
| 54 | NPL-KHU-054 | *Lardizabalaceae* | *Akebia* | *quinata* | Fruit and stem |
| 55 | NPL-KHU-055 | *Crassulaceae* | *Orostachys* | *japonica* | Whole plant |
| 56 | NPL-KHU-056 | *Caryophyllaceae* | *Silene* | *firma* | Whole plant |
| 57 | NPL-KHU-057 | *Solanaceae* | *Solanum* | *nigrum* | Whole plant |
| 58 | NPL-KHU-058 | *Asteraceae* | *Arctium* | *lappa* | Root |
| 59 | NPL-KHU-059 | *Brassicaceae* | *Brassica* | *napus* | Seed |
| 60 | NPL-KHU-060 | *Asteraceae* | *Artemisia* | *anomala* | Leaf |
| 61 | NPL-KHU-061 | *Ulmaceae* | *Ulmus* | *macrocarpa* | Rind |
| 62 | NPL-KHU-062 | *Burseraceae* | *Boswellia* | *carteri* | Resin |
| 63 | NPL-KHU-063 | *Lauraceae* | *Cinnamomum* | *cassia* | Rind |
| 64 | NPL-KHU-064 | *Orobanchaceae* | *Cistanche* | *deserticola* | Whole plant |
| 65 | NPL-KHU-065 | *Asteraceae* | *Artemisia* | *capillaris* | Leaf |
| 66 | NPL-KHU-066 | *Apiaceae* | *Angelica* | *acutiloba* | Root |
| 67 | NPL-KHU-067 | *Fabaceae* | *Pterocarpus* | *santalinus* | Wood |
| 68 | NPL-KHU-068 | *Lamiaceae* | *Perilla* | *frutescens* | Leaf |
| 69 | NPL-KHU-069 | *Lauraceae* | *Cinnamomum* | *camphora* | Leaf and rind |
| 70 | NPL-KHU-070 | *Polyporaceae* | *Polyporus* | *umbellatus* | Mushroom |
| 71 | NPL-KHU-071 | *Urticaceae* | *Boehmeria* | *nivea* | Stem |
| 72 | NPL-KHU-072 | *Adoxaceae* | *Sambucus* | *williamsii* | Fruit |
| 73 | NPL-KHU-073 | *Tamaricaceae* | *Tamarix* | *chinensis* | Whole plant |
| 74 | NPL-KHU-074 | *Myrtaceae* | *Syzygium* | *aromaticum* | Flower bud |
| 75 | NPL-KHU-075 | *Campanulaceae* | *Adenophora* | *remotiflora* | Root |
| 76 | NPL-KHU-076 | *Rhamnaceae* | *Hovenia* | *dulcis* | Fruit |
| 77 | NPL-KHU-077 | *Amaranthaceae* | *Kochia* | *scoparia* | Whole plant |
| 78 | NPL-KHU-078 | *Rutaceae* | *Poncirus* | *trifoliata* | Fruit |
| 79 | NPL-KHU-079 | *Plantaginaceae* | *Plantago* | *asiatica* | Seed and leaf |
| 80 | NPL-KHU-080 | *Apiaceae* | *Cnidium* | *officinale* | Root |
| 81 | NPL-KHU-081 | *Apiaceae* | *Ligusticum* | *chuanxiong* | Root |
| 82 | NPL-KHU-082 | *Amaranthaceae* | *Celosia* | *argentea* | Whole plant |
| 83 | NPL-KHU-083 | *Malvaceae* | *Alcea* | *rosea* | Flower |
| 84 | NPL-KHU-084 | *Amaryllidaceae* | *Allium* | *fistulosum* | Whole plant |
| 85 | NPL-KHU-085 | *Lamiaceae* | *Leonurus* | *japonicus* | Whole plant |
| 86 | NPL-KHU-086 | *Cupressaceae* | *Platycladus* | *orientalis* | Rind |
| 87 | NPL-KHU-087 | *Rubiaceae* | *Gardenia* | *jasminoides* | Fruit |
| 88 | NPL-KHU-088 | *Thymelaeaceae* | *Aquilaria* | *agallocha* | Resin |
| 89 | NPL-KHU-089 | *Apiaceae* | *Carum* | *carvi* | Seed |
| 90 | NPL-KHU-090 | *Apiaceae* | *Cuminum* | *cyminum* | Seed |
| 91 | NPL-KHU-091 | *Schisandraceae* | *Illicium* | *verum* | Seed |
| 92 | NPL-KHU-092 | *Euphorbiaceae* | *Ricinus* | *communis* | Seed |
| 93 | NPL-KHU-093 | *Nelumbonaceae* | *Nelumbo* | *nucifera* | Flower, seed and root |
| 94 | NPL-KHU-094 | *Asteraceae* | *Carpesium* | *abrotanoides* | Whole plant |
| 95 | NPL-KHU-095 | *Asteraceae* | *Eclipta* | *prostrata* | Whole plant |
| 96 | NPL-KHU-096 | *Lamiaceae* | *Phlomis* | *umbrosa* | Whole plant |
| 97 | NPL-KHU-097 | *Asteraceae* | *Artemisia* | *gmelinii* | Leaf |
| 98 | NPL-KHU-098 | *Lygodiaceae* | *Lygodium* | *japonicum* | Whole plant |
| 99 | NPL-KHU-099 | *Apiaceae* | *Glehnia* | *littoralis* | Root |
| 100 | NPL-KHU-100 | *Pinaceae* | *Pinus* | *koraiensis* | Seed |
| 101 | NPL-KHU-101 | *Lamiaceae* | *Elsholtzia* | *ciliata* | Whole plant |
| 102 | NPL-KHU-102 | *Geraniaceae* | *Geranium* | *thunbergii* | Root |
| 103 | NPL-KHU-103 | *Lamiaceae* | *Nepeta* | *tenuifolia* | Whole plant |
| 104 | NPL-KHU-104 | *Juglandaceae* | *Juglans* | *regia* | Seed and rind |
| 105 | NPL-KHU-105 | *Asteraceae* | *Carthamus* | *tinctorius* | Flower |
| 106 | NPL-KHU-106 | *Lamiaceae* | *Scutellaria* | *baicalensis* | Root |
| 107 | NPL-KHU-107 | *Lauraceae* | *Lindera* | *obtusiloba* | Whole plant |
| 108 | NPL-KHU-108 | *Apiaceae* | *Foeniculum* | *vulgare* | Seed |
| 109 | NPL-KHU-109 | *Fabaceae* | *Glycine* | *max* | Seed |
| 110 | NPL-KHU-110 | *Pedaliaceae* | *Sesamum* | *indicum* | Seed |
| 111 | NPL-KIOM-001 | *Fabaceae* | *Pueraria* | *lobata* | Root |
| 112 | NPL-KIOM-002 | *Asteraceae* | *Chrysanthemum* | *indicum* | Flower |
| 113 | NPL-KIOM-003 | *Fabaceae* | *Glycyrrhiza* | *glabra* | Root |
| 114 | NPL-KIOM-004 | *Fabaceae* | *Glycyrrhiza* | *inflata* | Root |
| 115 | NPL-KIOM-005 | *Fabaceae* | *Glycyrrhiza* | *uralensis* | Root |
| 116 | NPL-KIOM-006 | *Apiaceae* | *Notopterygium* | *forbesii* | Root |
| 117 | NPL-KIOM-007 | *Apiaceae* | *Notopterygium* | *incisum* | Root |
| 118 | NPL-KIOM-008 | *Apiaceae* | *Ostericum* | *koreanum* | Root |
| 119 | NPL-KIOM-009 | *Zingiberaceae* | *Curcuma* | *longa* | Root |
| 120 | NPL-KIOM-010 | *Brassicaceae* | *Brassica* | *juncea* | Seed and leaf |
| 121 | NPL-KIOM-011 | *Zingiberaceae* | *Zingiber* | *officinale* | Root |
| 122 | NPL-KIOM-012 | *Fagaceae* | *Castanea* | *crenata* | Fruit |
| 123 | NPL-KIOM-013 | *Nymphaeaceae* | *Euryale* | *ferox* | Seed |
| 124 | NPL-KIOM-014 | *Fabaceae* | *Cassia* | *obtusifolia* | Seed |
| 125 | NPL-KIOM-015 | *Fabaceae* | *Cassia* | *tora* | Seed |
| 126 | NPL-KIOM-016 | *Lauraceae* | *Cinnamomum* | *cassia* | Rind |
| 127 | NPL-KIOM-017 | *Zingiberaceae* | *Alpinia* | *officinarum* | Root |
| 128 | NPL-KIOM-018 | *Apiaceae* | *Ligusticum* | *sinense* | Root |
| 129 | NPL-KIOM-019 | *Apiaceae* | *Ligusticum* | *tenuissima* | Root |
| 130 | NPL-KIOM-020 | *Santalaceae* | *Viscum* | *album* | Whole plant |
| 131 | NPL-KIOM-021 | *Fabaceae* | *Caragana* | *sinica* | Root |
| 132 | NPL-KIOM-022 | *Polypodiaceae* | *Drynaria* | *fortunei* | Root |
| 133 | NPL-KIOM-023 | *Lamiaceae* | *Agastache* | *rugosa* | Whole plant |
| 134 | NPL-KIOM-024 | *Cucurbitaceae* | *Trichosanthes* | *kirilowii* | Root |
| 135 | NPL-KIOM-025 | *Cucurbitaceae* | *Trichosanthes* | *rosthornii* | Root |
| 136 | NPL-KIOM-026 | *Cucurbitaceae* | *Trichosanthes* | *kirilowii* | Root |
| 137 | NPL-KIOM-027 | *Cucurbitaceae* | *Trichosanthes* | *rosthornii* | Root |
| 138 | NPL-KIOM-028 | *Lamiaceae* | *Pogostemon* | *cablin* | Whole plant |
| 139 | NPL-KIOM-029 | *Solanaceae* | *Lycium* | *barbarum* | Fruit |
| 140 | NPL-KIOM-030 | *Solanaceae* | *Lycium* | *chinense* | Fruit |
| 141 | NPL-KIOM-031 | *Asteraceae* | *Chrysanthemum* | *zawadskii* | Flower |
| 142 | NPL-KIOM-032 | *Asteraceae* | *Chrysanthemum* | *zawadskii* | Flower |
| 143 | NPL-KIOM-033 | *Dicksoniaceae* | *Cibotium* | *barometz* | Root |
| 144 | NPL-KIOM-034 | *Asteraceae* | *Chrysanthemum* | *morifolium* | Flower |
| 145 | NPL-KIOM-035 | *Caprifoliaceae* | *Lonicera* | *japonica* | Flower and leaf |
| 146 | NPL-KIOM-036 | *Primulaceae* | *Lysimachia* | *christinae* | Root |
| 147 | NPL-KIOM-037 | *Campanulaceae* | *Platycodon* | *grandiflorum* | Root |
| 148 | NPL-KIOM-038 | *Brassicaceae* | *Raphanus* | *sativus* | Root |
| 149 | NPL-KIOM-039 | *Poaceae* | *Phragmites* | *communis* | Whole plant |
| 150 | NPL-KIOM-040 | *Lamiaceae* | *Salvia* | *miltiorrhiza* | Root |
| 151 | NPL-KIOM-041 | *Apiaceae* | *Angelica* | *gigas* | Root |
| 152 | NPL-KIOM-042 | *Campanulaceae* | *Codonopsis* | *pilosula* | Root |
| 153 | NPL-KIOM-043 | *Campanulaceae* | *Codonopsis* | *tangshen* | Root |
| 154 | NPL-KIOM-044 | *Campanulaceae* | *Codonopsis* | *pilosula* | Root |
| 155 | NPL-KIOM-045 | *Arecaceae* | *Areca* | *catechu* | Seed |
| 156 | NPL-KIOM-046 | *Rhamnaceae* | *Zizyphus* | *jujuba* | Fruit |
| 157 | NPL-KIOM-047 | *Rhamnaceae* | *Zizyphus* | *jujuba* | Fruit |
| 158 | NPL-KIOM-048 | *Rosaceae* | *Prunus* | *davidiana* | Seed |
| 159 | NPL-KIOM-049 | *Rosaceae* | *Prunus* | *persica* | Fruit |
| 160 | NPL-KIOM-050 | *Araliaceae* | *Aralia* | *continentalis* | Root |
| 161 | NPL-KIOM-051 | *Eucommiaceae* | *Eucommia* | *ulmoides* | Rind |
| 162 | NPL-KIOM-052 | *Eucommiaceae* | *Eucommia* | *ulmoides* | Rind |
| 163 | NPL-KIOM-053 | *Cannabaceae* | *Cannabis* | *sativa* | Whole plant |
| 164 | NPL-KIOM-054 | *Portulacaceae* | *Portulaca* | *oleracea* | Whole plant |
| 165 | NPL-KIOM-055 | *Ephedraceae* | *Ephedra* | *sinica* | Whole plant |
| 166 | NPL-KIOM-056 | *Ephedraceae* | *Ephedra* | *intermedia* | Whole plant |
| 167 | NPL-KIOM-057 | *Ephedraceae* | *Ephedra* | *equisetina* | Whole plant |
| 168 | NPL-KIOM-058 | *Ephedraceae* | *Ephedra* | *intermedia* | Whole plant |
| 169 | NPL-KIOM-059 | *Ephedraceae* | *Ephedra* | *equisetina* | Whole plant |
| 170 | NPL-KIOM-060 | *Verbenaceae* | *Vitex* | *rotundifolia* | Seed |
| 171 | NPL-KIOM-061 | *Verbenaceae* | *Vitex* | *trifolia* | Seed |
| 172 | NPL-KIOM-062 | *Asparagaceae* | *Liriope* | *platyphylla* | Root |
| 173 | NPL-KIOM-063 | *Asparagaceae* | *Ophiopogon* | *japonicus* | Root |
| 174 | NPL-KIOM-064 | *Poaceae* | *Hordeum* | *vulgare* | Whole plant |
| 175 | NPL-KIOM-065 | *Rosaceae* | *Chaenomeles* | *sinensis* | Fruit |
| 176 | NPL-KIOM-066 | *Rosaceae* | *Chaenomeles* | *speciosa* | Fruit |
| 177 | NPL-KIOM-067 | *Paeoniaceae* | *Paeonia* | *suffruticosa* | Root |
| 178 | NPL-KIOM-068 | *Equisetaceae* | *Equisetum* | *hyemale* | Whole plant |
| 179 | NPL-KIOM-069 | *Lardizabalaceae* | *Akebia* | *quinata* | Fruit |
| 180 | NPL-KIOM-070 | *Asteraceae* | *Aucklandia* | *lappa* | Root |
| 181 | NPL-KIOM-071 | *Lamiaceae* | *Mentha* | *arvensis* | Whole plant |
| 182 | NPL-KIOM-072 | *Araceae* | *Pinellia* | *ternata* | Root |
| 183 | NPL-KIOM-073 | *Menispermaceae* | *Sinomenium* | *acutum* | Root |
| 184 | NPL-KIOM-074 | *Apiaceae* | *Saposhnikovia* | *divaricata* | Root |
| 185 | NPL-KIOM-075 | *Ginkgoaceae* | *Ginkgo* | *biloba* | Leaf |
| 186 | NPL-KIOM-076 | *Papaveraceae* | *Chelidonium* | *majus* | Whole plant |
| 187 | NPL-KIOM-077 | *Zingiberaceae* | *Amomum* | *kravanh* | Seed |
| 188 | NPL-KIOM-078 | *Zingiberaceae* | *Amomum* | *compactum* | Seed |
| 189 | NPL-KIOM-079 | *Apocynaceae* | *Cynanchum* | *wilfordii* | Root |
| 190 | NPL-KIOM-080 | *Apiaceae* | *Angelica* | *dahurica* | Root |
| 191 | NPL-KIOM-081 | *Apiaceae* | *Angelica* | *dahurica* | Root |
| 192 | NPL-KIOM-082 | *Asteraceae* | *Atractylodes* | *japonica* | Root |
| 193 | NPL-KIOM-083 | *Asteraceae* | *Atractylodes* | *macrocephala* | Root |
| 194 | NPL-KIOM-084 | *Fabaceae* | *Dolichos* | *lablab* | Fruit |
| 195 | NPL-KIOM-085 | *Rubiaceae* | *Hedyotis* | *diffusa* | Whole plant |
| 196 | NPL-KIOM-086 | *Fabaceae* | *Psoralea* | *corylifolia* | Seed |
| 197 | NPL-KIOM-087 | *Polyporaceae* | *Poria* | *cocos* | Mycelium |
| 198 | NPL-KIOM-088 | *Rosaceae* | *Rubus* | *coreanus* | Fruit |
| 199 | NPL-KIOM-089 | *Ranunculaceae* | *Aconitum* | *carmichaeli* | Root |
| 200 | NPL-KIOM-090 | *Ranunculaceae* | *Aconitum* | *carmichaeli* | Root |
| 201 | NPL-KIOM-091 | *Arecaceae* | *Areca* | *catechu* | Seed |
| 202 | NPL-KIOM-092 | *Campanulaceae* | *Adenophora* | *triphylla* | Root |
| 203 | NPL-KIOM-093 | *Apiaceae* | *Cnidium* | *monieri* | Seed |
| 204 | NPL-KIOM-094 | *Apiaceae* | *Torilis* | *japonica* | Seed |
| 205 | NPL-KIOM-095 | *Zingiberaceae* | *Amomum* | *villosum* | Seed |
| 206 | NPL-KIOM-096 | *Zingiberaceae* | *Amomum* | *villosum* | Seed |
| 207 | NPL-KIOM-097 | *Rosaceae* | *Crataegus* | *pinnatifida* | Fruit |
| 208 | NPL-KIOM-098 | *Cornaceae* | *Cornus* | *officinalis* | Fruit |
| 209 | NPL-KIOM-099 | *Dioscoreaceae* | *Dioscorea* | *batatas* | Root |
| 210 | NPL-KIOM-100 | *Dioscoreaceae* | *Dioscorea* | *japonica* | Root |
| 211 | NPL-KIOM-101 | *Rhamnaceae* | *Zizyphus* | *jujuba* | Fruit and root |
| 212 | NPL-KIOM-102 | *Rhamnaceae* | *Zizyphus* | *jujuba* | Fruit and root |
| 213 | NPL-KIOM-103 | *Rutaceae* | *Zanthoxylum* | *piperitum* | Rind and seed |
| 214 | NPL-KIOM-104 | *Rutaceae* | *Zanthoxylum* | *schinifolium* | Rind and seed |
| 215 | NPL-KIOM-105 | *Rutaceae* | *Zanthoxylum* | *bungeanum* | Rind and seed |
| 216 | NPL-KIOM-106 | *Sparganiaceae* | *Sparganium* | *stoloniferum* | Root |
| 217 | NPL-KIOM-107 | *Moraceae* | *Morus* | *alba* | Leaf and fruit |
| 218 | NPL-KIOM-108 | *Moraceae* | *Morus* | *alba* | Leaf and fruit |
| 219 | NPL-KIOM-109 | *Moraceae* | *Morus* | *bombycis* | Leaf and root |
| 220 | NPL-KIOM-110 | *Moraceae* | *Morus* | *alba* | Leaf and fruit |
| 221 | NPL-KIOM-111 | *Orchidaceae* | *Dendrobium* | *fimbriatum* | Whole plant |
| 222 | NPL-KIOM-112 | *Orchidaceae* | *Dendrobium* | *candidum* | Whole plant |
| 223 | NPL-KIOM-113 | *Acoraceae* | *-* | *Acorus* | gramineus |
| 224 | NPL-KIOM-114 | *Hypoxidaceae* | *Curculigo* | *orchioides* | Root |
| 225 | NPL-KIOM-115 | *Aristolochiaceae* | *Asiasarum* | *heterotropoides* | Root |
| 226 | NPL-KIOM-116 | *Aristolochiaceae* | *Asiasarum* | *sieboldii* | Root |
| 227 | NPL-KIOM-117 | *Fabaceae* | *Cassia* | *angustifolia* | Leaf and seed |
| 228 | NPL-KIOM-118 | *Fabaceae* | *Caesalpinia* | *sappan* | Seed and rind |
| 229 | NPL-KIOM-119 | *Dipsacaceae* | *Dipsacus* | *asperoides* | Root |
| 230 | NPL-KIOM-120 | *Ranunculaceae* | *Cimicifuga* | *heracleifolia* | Root |
| 231 | NPL-KIOM-121 | *Ranunculaceae* | *Cimicifuga* | *dahurica* | Root |
| 232 | NPL-KIOM-122 | *Apiaceae* | *Anethum* | *graveolens* | Whole plant |
| 233 | NPL-KIOM-123 | *Ebenaceae* | *Diospyros* | *kaki* | Fruit |
| 234 | NPL-KIOM-124 | *Apiaceae* | *Bupleurum* | *falcatum* | Root |
| 235 | NPL-KIOM-125 | *Apiaceae* | *Bupleurum* | *scorzonerifolium* | Root |
| 236 | NPL-KIOM-126 | *Apiaceae* | *Peucedanum* | *japonicum* | Root |
| 237 | NPL-KIOM-127 | *Lycopodiaceae* | *Lycopodium* | *clavatum* | Whole plant |
| 238 | NPL-KIOM-128 | *Zingiberaceae* | *Curcuma* | *kwangsiensis* | Root |
| 239 | NPL-KIOM-129 | *Zingiberaceae* | *Curcuma* | *phaeocaulis* | Root |
| 240 | NPL-KIOM-130 | *Zingiberaceae* | *Curcuma* | *wenyujin* | Root |
| 241 | NPL-KIOM-131 | *Asteraceae* | *Artemisia* | *argyi* | Leaf |
| 242 | NPL-KIOM-132 | *Asteraceae* | *Artemisia* | *princeps* | Leaf |
| 243 | NPL-KIOM-133 | *Asteraceae* | *Artemisia* | *montana* | Leaf |
| 244 | NPL-KIOM-134 | *Saururaceae* | *Houttuynia* | *cordata* | Whole plant |
| 245 | NPL-KIOM-135 | *Oleaceae* | *Ligustrum* | *lucidum* | Fruit and leaf |
| 246 | NPL-KIOM-136 | *Oleaceae* | *Ligustrum* | *japoricum* | Fruit and leaf |
| 247 | NPL-KIOM-137 | *Oleaceae* | *Forsythia* | *viridissima* | Fruit and leaf |
| 248 | NPL-KIOM-138 | *Oleaceae* | *Forsythia* | *suspensa* | Fruit and leaf |
| 249 | NPL-KIOM-139 | *Nelumbonaceae* | *Nelumbo* | *nucifera* | Seed and root |
| 250 | NPL-KIOM-140 | *Araliaceae* | *Acanthopanax* | *sessiliflorum* | Root |
| 251 | NPL-KIOM-141 | *Scolopendridae* | *Scolopendra* | *subspinipes* | Whole plant |
| 252 | NPL-KIOM-142 | *Schisandraceae* | *Schisandra* | *chinensis* | Fruit |
| 253 | NPL-KIOM-143 | *Rutaceae* | *Evodia* | *rutaecarpa* | Fruit and seed |
| 254 | NPL-KIOM-144 | *Lauraceae* | *Lindera* | *strichnifolia* | Whole plant |
| 255 | NPL-KIOM-145 | *Convallariaceae* | *Polygonatum* | *odoratum* | Root |
| 256 | NPL-KIOM-146 | *Gentianaceae* | *Gentiana* | *manshurica* | Root |
| 257 | NPL-KIOM-147 | *Gentianaceae* | *Gentiana* | *scabra* | Root |
| 258 | NPL-KIOM-148 | *Sapindaceae* | *Dimocarpus* | *longan* | Fruit |
| 259 | NPL-KIOM-149 | *Asteraceae* | *Arctium* | *lappa* | Root |
| 260 | NPL-KIOM-150 | *Amaranthaceae* | *Achyranthes* | *japonica* | Root |
| 261 | NPL-KIOM-151 | *Zingiberaceae* | *Curcuma* | *wenyujin* | Root |
| 262 | NPL-KIOM-152 | *Polygalaceae* | *Polygala* | *tenuifolia* | Root |
| 263 | NPL-KIOM-153 | *Ranunculaceae* | *Clematis* | *manshurica* | Root |
| 264 | NPL-KIOM-154 | *Ranunculaceae* | *Clematis* | *chinensis* | Root |
| 265 | NPL-KIOM-155 | *Ulmaceae* | *Ulmus* | *macrocarpa* | Rind |
| 266 | NPL-KIOM-156 | *Lauraceae* | *Cinnamomum* | *cassia* | Rind |
| 267 | NPL-KIOM-157 | *Orobanchaceae* | *Cistanche* | *deserticola* | Whole plant |
| 268 | NPL-KIOM-158 | *Ginkgoaceae* | *Ginkgo* | *biloba* | Leaf |
| 269 | NPL-KIOM-159 | *Berberidaceae* | *Epimedium* | *koreanum* | Whole plant |
| 270 | NPL-KIOM-160 | *Berberidaceae* | *Epimedium* | *sagittatum* | Whole plant |
| 271 | NPL-KIOM-161 | *Berberidaceae* | *Epimedium* | *brevicornum* | Whole plant |
| 272 | NPL-KIOM-162 | *Poaceae* | *Coix* | *lacryma-jovi* | Seed |
| 273 | NPL-KIOM-163 | *Lamiaceae* | *Leonurus* | *japonicus* | Whole plant |
| 274 | NPL-KIOM-164 | *Zingiberaceae* | *Alpinia* | *oxyphylla* | Root |
| 275 | NPL-KIOM-165 | *Caprifoliaceae* | *Lonicera* | *japonica* | Flower and leaf |
| 276 | NPL-KIOM-166 | *Araliaceae* | *Panax* | *ginseng* | Root |
| 277 | NPL-KIOM-167 | *Asteraceae* | *Artemisia* | *capillaris* | Leaf |
| 278 | NPL-KIOM-168 | *Apiaceae* | *Angelica* | *acutiloba* | Root |
| 279 | NPL-KIOM-169 | *Apiaceae* | *Angelica* | *acutiloba* | Root |
| 280 | NPL-KIOM-170 | *Boraginaceae* | *Lithospermum* | *erythrorhizon* | Root |
| 281 | NPL-KIOM-171 | *Boraginaceae* | *Arnebia* | *euchroma* | Root |
| 282 | NPL-KIOM-172 | *Boraginaceae* | *Arnebia* | *guttata* | Root |
| 283 | NPL-KIOM-173 | *Lamiaceae* | *Perilla* | *frutescens* | Leaf |
| 284 | NPL-KIOM-174 | *Lamiaceae* | *Perilla* | *frutescens* | Leaf |
| 285 | NPL-KIOM-175 | *Lamiaceae* | *Perilla* | *frutescens* | Leaf |
| 286 | NPL-KIOM-176 | *Lamiaceae* | *Perilla* | *frutescens* | Leaf |
| 287 | NPL-KIOM-177 | *Asteraceae* | *Aster* | *tataricus* | Whole plant |
| 288 | NPL-KIOM-178 | *Paeoniaceae* | *Paeonia* | *lactiflora* | Root |
| 289 | NPL-KIOM-179 | *Polyporaceae* | *Polyporus* | *umbellatus* | Mycelium |
| 290 | NPL-KIOM-180 | *Apiaceae* | *Angelica* | *decursiva* | Root |
| 291 | NPL-KIOM-181 | *Apiaceae* | *Peucedanum* | *praeruptorum* | Root |
| 292 | NPL-KIOM-182 | *Liliaceae* | *Fritillaria* | *thunbergii* | Bulb |
| 293 | NPL-KIOM-183 | *Ranunculaceae* | *Aconitum* | *carmichaeli* | Root |
| 294 | NPL-KIOM-184 | *Fabaceae* | *Gleditsia* | *sinensis* | Seed and rind |
| 295 | NPL-KIOM-185 | *Polygonaceae* | *Rheum* | *undulatum* | Root |
| 296 | NPL-KIOM-186 | *Poaceae* | *Phyllostachys* | *nigra* | Stem |
| 297 | NPL-KIOM-187 | *Poaceae* | *Phyllostachys* | *bambusoides* | Stem |
| 298 | NPL-KIOM-188 | *Rutaceae* | *Citrus* | *aurantium* | Rind and fruit |
| 299 | NPL-KIOM-189 | *Rutaceae* | *Citrus* | *natsudaidai* | Rind and fruit |
| 300 | NPL-KIOM-190 | *Solanaceae* | *Lycium* | *chinense* | Fruit |
| 301 | NPL-KIOM-191 | *Solanaceae* | *Lycium* | *barbarum* | Fruit |
| 302 | NPL-KIOM-192 | *Rhamnaceae* | *Hovenia* | *dulcis* | Fruit |
| 303 | NPL-KIOM-193 | *Asparagaceae* | *Anemarrhena* | *asphodeloides* | Root |
| 304 | NPL-KIOM-194 | *Amaranthaceae* | *Kochia* | *scoparia* | Whole plant |
| 305 | NPL-KIOM-195 | *Rutaceae* | *Poncirus* | *trifoliata* | Fruit and rind |
| 306 | NPL-KIOM-196 | *Rosaceae* | *Sanguisorba* | *officinalis* | Root |
| 307 | NPL-KIOM-197 | *Rosaceae* | *Sanguisorba* | *officinalis* | Root |
| 308 | NPL-KIOM-198 | *Orobanchaceae* | *Rehmannia* | *glutinosa* | Root |
| 309 | NPL-KIOM-199 | *Gentianaceae* | *Gentiana* | *dahurica* | Root |
| 310 | NPL-KIOM-200 | *Rutaceae* | *Citrus* | *reticulata* | Rind and fruit |
| 311 | NPL-KIOM-201 | *Rutaceae* | *Citrus* | *unshiu* | Rind and fruit |
| 312 | NPL-KIOM-202 | *Zygophyllaceae* | *Tribulus* | *terrestris* | Fruit |
| 313 | NPL-KIOM-203 | *Plantaginaceae* | *Plantago* | *asiatica* | Seed and whole plant |
| 314 | NPL-KIOM-204 | *Plantaginaceae* | *Plantago* | *depressa* | Seed and whole plant |
| 315 | NPL-KIOM-205 | *Asteraceae* | *Atractylodes* | *chinensis* | Root |
| 316 | NPL-KIOM-206 | *Asteraceae* | *Atractylodes* | *lancea* | Root |
| 317 | NPL-KIOM-207 | *Apiaceae* | *Cnidium* | *officinale* | Root |
| 318 | NPL-KIOM-208 | *Apiaceae* | *Ligusticum* | *chuanxiong* | Root |
| 319 | NPL-KIOM-209 | *Araceae* | *Arisaema* | *amurense* | Root |
| 320 | NPL-KIOM-210 | *Orchidaceae* | *Gastrodia* | *elata* | Bulb |
| 321 | NPL-KIOM-211 | *Asparagaceae* | *Asparagus* | *cochinchinensis* | Root |
| 322 | NPL-KIOM-212 | *Rutaceae* | *Citrus* | *reticulata* | Rind and fruit |
| 323 | NPL-KIOM-213 | *Rutaceae* | *Citrus* | *unshiu* | Rind and fruit |
| 324 | NPL-KIOM-214 | *Zingiberaceae* | *Amomum* | *tsao-ko* | Seed |
| 325 | NPL-KIOM-215 | *Zingiberaceae* | *Alpinia* | *katsumadai* | Seed and root |
| 326 | NPL-KIOM-216 | *Rubiaceae* | *Gardenia* | *jasminoides* | Fruit |
| 327 | NPL-KIOM-217 | *Anacardiaceae* | *Rhus* | *verniciflua* | Rind |
| 328 | NPL-KIOM-218 | *Lamiaceae* | *Lycopus* | *lucidus* | Whole plant |
| 329 | NPL-KIOM-219 | *Alismataceae* | *Alisma* | *orientale* | Root |
| 330 | NPL-KIOM-220 | *Asteraceae* | *Inula* | *helenium* | Root |
| 331 | NPL-KIOM-221 | *Smilacaceae* | *Smilax* | *china* | Root |
| 332 | NPL-KIOM-222 | *Convolvulaceae* | *Cuscuta* | *chinensis* | Whole plant |
| 333 | NPL-KIOM-223 | *Rubiaceae* | *Morinda* | *officinalis* | Root |
| 334 | NPL-KIOM-224 | *Asteraceae* | *Eupatorium* | *fortunei* | Whole plant |
| 335 | NPL-KIOM-225 | *Asteraceae* | *Taraxacum* | *coreanum* | Whole plant |
| 336 | NPL-KIOM-226 | *Asteraceae* | *Taraxacum* | *mongolicum* | Whole plant |
| 337 | NPL-KIOM-227 | *Asteraceae* | *Taraxacum* | *officinale* | Whole plant |
| 338 | NPL-KIOM-228 | *Piperaceae* | *Piper* | *longum* | Fruit |
| 339 | NPL-KIOM-229 | *Polygonaceae* | *Polygonum* | *multiflorum* | Root |
| 340 | NPL-KIOM-230 | *Asteraceae* | *Eclipta* | *prostrata* | Whole plant |
| 341 | NPL-KIOM-231 | *Asteraceae* | *Artemisia* | *iwayomogi* | Leaf |
| 342 | NPL-KIOM-232 | *Fabaceae* | *Albizzia* | *julibrissin* | Flower and fruit |
| 343 | NPL-KIOM-233 | *Araliaceae* | *Kalopanax* | *pictus* | Rind |
| 344 | NPL-KIOM-234 | *Apiaceae* | *Glehnia* | *littoralis* | Root |
| 345 | NPL-KIOM-235 | *Rosaceae* | *Prunus* | *armeniaca* | Fruit |
| 346 | NPL-KIOM-236 | *Rosaceae* | *Prunus* | *mandshurica* | Fruit |
| 347 | NPL-KIOM-237 | *Cyperaceae* | *Cyperus* | *rotundus* | Root |
| 348 | NPL-KIOM-238 | *Lamiaceae* | *Elsholtzia* | *ciliata* | Whole plant |
| 349 | NPL-KIOM-239 | *Scrophulariaceae* | *Scrophularia* | *buergeriana* | Whole plant |
| 350 | NPL-KIOM-240 | *Scrophulariaceae* | *Scrophularia* | *ningpoensis* | Whole plant |
| 351 | NPL-KIOM-241 | *Geraniaceae* | *Geranium* | *thunbergii* | Whole plant |
| 352 | NPL-KIOM-242 | *Papaveraceae* | *Corydalis* | *ternata* | Root |
| 353 | NPL-KIOM-243 | *Papaveraceae* | *Corydalis* | *yanhusuo* | Root |
| 354 | NPL-KIOM-244 | *Lamiaceae* | *Schizonepeta* | *tenuifolia* | Whole plant |
| 355 | NPL-KIOM-245 | *Fabaceae* | *Trigonella* | *foenum-graecum* | Seed |
| 356 | NPL-KIOM-246 | *Polygonaceae* | *Polygonum* | *cuspidatum* | Root |
| 357 | NPL-KIOM-247 | *Asteraceae* | *Carthamus* | *tinctorius* | Flower and seed |
| 358 | NPL-KIOM-248 | *Asteraceae* | *Carthamus* | *tinctorius* | Flower and seed |
| 359 | NPL-KIOM-249 | *Lamiaceae* | *Scutellaria* | *baicalensis* | Root |
| 360 | NPL-KIOM-250 | *Fabaceae* | *Astragalus* | *membranaceus* | Root |
| 361 | NPL-KIOM-251 | *Fabaceae* | *Astragalus* | *membranaceus* | Root |
| 362 | NPL-KIOM-252 | *Ranunculaceae* | *Coptis* | *chinensis* | Root |
| 363 | NPL-KIOM-253 | *Ranunculaceae* | *Coptis* | *deltoidea* | Root |
| 364 | NPL-KIOM-254 | *Ranunculaceae* | *Coptis* | *japonica* | Root |
| 365 | NPL-KIOM-255 | *Ranunculaceae* | *Coptis* | *teeta* | Root |
| 366 | NPL-KIOM-256 | *Rutaceae* | *Phellodendron* | *amurense* | Rind |
| 367 | NPL-KIOM-257 | *Rutaceae* | *Phellodendron* | *chinense* | Rind |
| 368 | NPL-KIOM-258 | *Asparagaceae* | *Polygonatum* | *sibiricum* | Root |
| 369 | NPL-KIOM-259 | *Asparagaceae* | *Polygonatum* | *cyrtonema* | Root |
| 370 | NPL-KIOM-260 | *Asparagaceae* | *Polygonatum* | *falcatum* | Root |
| 371 | NPL-KIOM-261 | *Asparagaceae* | *Polygonatum* | *kingianum* | Root |
| 372 | NPL-KIOM-262 | *Apiaceae* | *Foeniculum* | *vulgare* | Seed |
| 373 | NPL-KIOM-263 | *Magnoliaceae* | *Magnolia* | *officinalis* | Rind |
| 374 | NPL-KIOM-264 | *Magnoliaceae* | *Magnolia* | *obovata* | Rind |
| 375 | NPL-KIOM-265 | *Pedaliaceae* | *Sesamum* | *indicum* | Seed |
| 376 | NPL-NET-001 | *Ericaceae* | *Vaccinium* | *bracteatum* | Leaves |
| 377 | NPL-NET-002 | *Apocynaceae* | *Cynanchum* | *wilfordii* | Root |
| 378 | NPL-NET-003 | *Apocynaceae* | *Cynanchum* | *wilfordii* | Root |
| 379 | NPL-NET-004 | *Apocynaceae* | *Cynanchum* | *wilfordii* | Root |
| 380 | NPL-NET-005 | *Apocynaceae* | *Cynanchum* | *wilfordii* | Root |
| 381 | NPL-NET-006 | *Apocynaceae* | *Cynanchum* | *wilfordii* | Root |
| 382 | NPL-NET-007 | *Apocynaceae* | *Cynanchum* | *wilfordii* | Root |
| 383 | NPL-NET-008 | *Apocynaceae* | *Cynanchum* | *wilfordii* | Root |
| 384 | NPL-NET-009 | *Apocynaceae* | *Cynanchum* | *wilfordii* | Root |
| 385 | NPL-NET-010 | *Apocynaceae* | *Cynanchum* | *wilfordii* | Root |
| 386 | NPL-NET-011 | *Apocynaceae* | *Cynanchum* | *wilfordii* | Root |
| 387 | NPL-NET-012 | *Apocynaceae* | *Cynanchum* | *wilfordii* | Root |
| 388 | NPL-NET-013 | *Apocynaceae* | *Cynanchum* | *wilfordii* | Root |
| 389 | NPL-NET-014 | *Apocynaceae* | *Cynanchum* | *wilfordii* | Root |
| 390 | NPL-NET-015 | *Apocynaceae* | *Cynanchum* | *wilfordii* | Root |
| 391 | NPL-NET-016 | *Apocynaceae* | *Cynanchum* | *wilfordii* | Root |
| 392 | NPL-NET-032 | *Apiaceae* | *Ostericum* | *koreanum* | Root |
| 393 | NPL-NET-033 | *Araliaceae* | *Aralia* | *cordata* | Root |
| 394 | NPL-NET-034 | *Apiaceae* | *Angelica* | *dahurica* | Root |
| 395 | NPL-NET-035 | *Apiaceae* | *Anthriscus* | *sylvestris* | Root |
| 396 | NPL-NET-036 | *Apiaceae* | *Angelica* | *gigas* | Root |
| 397 | NPL-NET-037 | *Apiaceae* | *Angelica* | *acutiloba* | Root |
| 398 | NPL-NET-038 | *Apiaceae* | *Angelica* | *sinensis* | Root |
| 399 | NPL-NET-039 | *Apiaceae* | *Levisticum* | *officinale* | Root |
| 400 | NPL-NET-040 | *Apiaceae* | *Angelica* | *gigas* | Root |
| 401 | NPL-NET-041 | *Apiaceae* | *Angelica* | *gigas* | Root |
| 402 | NPL-NET-042 | *Asteraceae* | *Chrysanthemum* | *cinerariifolium* | Flower |
| 403 | NPL-NET-043 | *Loganiaceae* | *Strychnos* | *-* | Seed |
| 404 | NPL-NET-044 | *Caprifoliaceae* | *Valeriana* | *officinalis* | Root |
| 405 | NPL-NPL-001 | *Ginkgoaceae* | *Ginkgo* | *biloba* | Leaves |
| 406 | NPL-NPL-002 | *Fabaceae* | *Sophora* | *japonica* | Flowers |
| 407 | NPL-NPL-003 | *Asteraceae* | *Senecio* | *jacobaea* | - |
| 408 | NPL-NPL-004 | *Ranunculaceae* | *Aconitum* | *carmichaelii* | Root |
| 409 | NPL-NPL-005 | *Ranunculaceae* | *Aconitum* | *carmichaelii* | Root |
| 410 | NPL-NPL-006 | *Ephedraceae* | *Ephedra* | *sinica* | Aerial parts |
| 411 | NPL-NPL-007 | *Rutaceae* | *Phellodendron* | *amurense* | Bark |
| 412 | NPL-NPL-008 | *Rutaceae* | *Phellodendron* | *amurense* | Bark |
| 413 | NPL-NPL-009 | *Ranunculaceae* | *Coptis* | *japonica* | Root |
| 414 | NPL-NPL-010 | *Ulmaceae* | *Ulmus* | *davidiana* | Bark |
| 415 | NPL-NPL-011 | *Araliaceae* | *Acanthopanax* | *sessiliflorum* | Root and stem |
| 416 | NPL-NPL-012 | *Paeoniaceae* | *Paeonia* | *suffriticosa* | Root |
| 417 | NPL-NPL-013 | *Paeoniaceae* | *Paeonia* | *suffriticosa* | Root |
| 418 | NPL-NPL-014 | *Fabaceae* | *Glycyrrhiza* | *glabra* | Root |
| 419 | NPL-NPL-015 | *Fabaceae* | *Glycyrrhiza* | *glabra* | Root |
| 420 | NPL-NPL-016 | *Lamiaceae* | *Scutellaria* | *baicalensis* | Root |
| 421 | NPL-NPL-017 | *Rubiaceae* | *Uncaria* | *rhynchophylla* | Stem and hooks |
| 422 | NPL-NPL-018 | *Rubiaceae* | *Uncaria* | *tomentosa* | Stem and hooks |
| 423 | NPL-NPL-019 | *Taxaceae* | *Taxus* | *chinensis* | - |
| 424 | NPL-NPL-020 | *Fabaceae* | *Genista* | *monspesulana* | Leaves |
| 425 | NPL-NPL-021 | *Fabaceae* | *Astragalus* | *membranaceus* | Root |
| 426 | NPL-NPL-022 | *Solanaceae* | *Lycium* | *chinensis* | Fruit |
| 427 | NPL-NPL-023 | *Amaranthaceae* | *Achyranthes* | *bidentata* | Root |
| 428 | NPL-NPL-024 | *Amaranthaceae* | *Achyranthes* | *japonica* | Root |
| 429 | NPL-NPL-025 | *Amaranthaceae* | *Cyathula* | *officinalis* | Root |
| 430 | NPL-NPL-026 | *Aquifoliaceae* | *Ilex* | *aquifolium* | Leaves |
| 431 | NPL-NPL-027 | *Malvaceae* | *Adansonia* | *digitata* | Fruit and leaves |
| 432 | NPL-NPL-028 | *Campanulaceae* | *Codonopsis* | *pilosula* | Root |
| 433 | NPL-NPL-029 | *Apocynaceae* | *Catharanthus* | *roseus* | Leaves |
| 434 | NPL-NPL-031 | *Poaceae* | *Zea* | *mays* | Seed |
| 435 | NPL-NPL-032 | *Asteraceae* | *Calendula* | *arvensis* | Flower |
| 436 | NPL-NPL-033 | *Moraceae* | *Morus* | *alba* | Leaves |
| 437 | NPL-NPL-034 | *Moraceae* | *Morus* | *alba* | Leaves |
| 438 | NPL-NPL-037 | *Boraginaceae* | *Arnebia* | *euchroma* | Root |
| 439 | NPL-NPL-038 | *Asteraceae* | *Synurus* | *deltoides* | Leaves |
| 440 | NPL-NPL-039 | *Fabaceae* | *Millettia* | *saptholobi* | Stem |
| 441 | NPL-NPL-040 | *Apocynaceae* | *Hoodia* | *gordonii* | Stem |
| 442 | NPL-NPL-041 | *Lamiaceae* | *Orthosiphon* | *stamineus* | Leaves |
| 443 | NPL-NPL-042 | *Polygalaceae* | *Polygala* | *tenuifolia* | Root |
| 444 | NPL-NPL-043 | *Polygalaceae* | *Polygala* | *tenuifolia* | Root |
| 445 | NPL-NPL-044 | *Apiaceae* | *Angelica* | *acutiloba* | Root |
| 446 | NPL-NPL-045 | *Schisandraceae* | *Schisandra* | *chinensis* | Fruit |
| 447 | NPL-NPL-046 | *Asteraceae* | *Chrysanthemum* | *indicum* | Flower |
| 448 | NPL-NPL-047 | *Rhamnaceae* | *Zizyphus* | *jujuba* | Fruit |
| 449 | NPL-NPL-048 | *Apiaceae* | *Ligusticum* | *striatum* | Root |
| 450 | NPL-RDA-001 | *Araliaceae* | *Panax* | *ginseng* | Root |
| 451 | NPL-RDA-002 | *Zingiberaceae* | *Zingiber* | *officinale* | Root |
| 452 | NPL-RDA-003 | *Schisandraceae* | *Schisandra* | *chinensis* | Fruit |
| 453 | NPL-RDA-004 | *Paeoniaceae* | *Paeonia* | *lactiflora* | Root |
| 454 | NPL-RDA-005 | *Asteraceae* | *Atractylodes* | *macrocephala* | Root |
| 455 | NPL-RDA-006 | *Asteraceae* | *Artemisia* | *iwayomogi* | Leaves |
| 456 | NPL-RDA-007 | *Campanulaceae* | *Codonopsis* | *lanceolata* | Root |
| 457 | NPL-RDA-008 | *Apiaceae* | *Angelica* | *gigas* | Root |
| 458 | NPL-RDA-009 | *Apiaceae* | *Cnidium* | *officinale* | Root |
| 459 | NPL-RDA-010 | *Asteraceae* | *Artemisia* | *argyi* | Leaves |
| 460 | NPL-RDA-011 | *Araliaceae* | *Acanthopanax* | *senticosus* | Root and stem |
| 461 | NPL-RDA-012 | *Amaranthaceae* | *Achyranthes* | *japonica* | Root |
| 462 | NPL-RDA-013 | *Fabaceae* | *Glycyrrhiza* | *uralensis* | Root |
| 463 | NPL-RDA-014 | *Cornaceae* | *Cornus* | *officinalis* | Fruit |
| 464 | NPL-RDA-015 | *Zingiberaceae* | *Curcuma* | *longa* | Rhizome |
| 465 | NPL-RDA-016 | *Fabaceae* | *Astragalus* | *membranaceus* | Root |
| 466 | NPL-RDA-017 | *Asteraceae* | *Ixeris* | *strigosa* | Leaves |
| 467 | NPL-RDA-018 | *Lamiaceae* | *Scutellaria* | *baicalensis* | Root |
| 468 | NPL-RDA-019 | *Rosaceae* | *Rubus* | *coreanus* | Fruit |
| 469 | NPL-RDA-020 | *Araliaceae* | *Aralia* | *continentalis* | Root |
| 470 | NPL-RDA-021 | *Poaceae* | *Coix* | *lacryma-jobi* | Seed |
| 471 | NPL-RDA-022 | *Campanulaceae* | *Platycodon* | *grandiflorum* | Root |
| 472 | NPL-RDA-023 | *Orobanchaceae* | *Rehmannia* | *glutinosa* | Root |
| 473 | NPL-RDA-024 | *Asteraceae* | *Carthamus* | *tinctorius* | Flower |
| 474 | NPL-RDA-025 | *Asparagaceae* | *Liriope* | *platyphylla* | Root |
| 475 | NPL-RDA-026 | *Polygonaceae* | *Polygonum* | *multiflorum* | Root |
| 476 | NPL-RDA-027 | *Asparagaceae* | *Polygonatum* | *sibiricum* | Root |
| 477 | NPL-RDA-028 | *Apocynaceae* | *Cynanchum* | *wilfordii* | Root |
| 478 | NPL-SUB-001 | *Apiaceae* | *Notopterygium* | *-* | Root |
| 479 | NPL-SUB-002 | *Apiaceae* | *Glehnia* | *littoralis* | Root |
| 480 | NPL-SUB-003 | *Apiaceae* | *Glehnia* | *littoralis* | Root |
| 481 | NPL-SUB-004 | *Zingiberaceae* | *Zingiber* | *-* | Root |
| 482 | NPL-SUB-005 | *Zingiberaceae* | *Alpinia* | *officinarum* | Root |
| 483 | NPL-SUB-006 | *Apiaceae* | *Ligusticum* | *chuanxiong* | Root |
| 484 | NPL-SUB-007 | *Polypodiaceae* | *Drynaria* | *fortunei* | Root |
| 485 | NPL-SUB-008 | *Cibotiaceae* | *Cibotium* | *barometz* | Root |
| 486 | NPL-SUB-009 | *Polygonaceae* | *Fagopyrum* | *dibotryis* | Root |
| 487 | NPL-SUB-010 | *Campanulaceae* | *Platycodon* | *grandiflorus* | Root |
| 488 | NPL-SUB-011 | *Lamiaceae* | *Salvia* | *miltiorrhiza* | Root |
| 489 | NPL-SUB-012 | *Lamiaceae* | *Salvia* | *miltiorrhiza* | Root |
| 490 | NPL-SUB-013 | *Lamiaceae* | *Salvia* | *miltiorrhiza* | Root |
| 491 | NPL-SUB-014 | *Lamiaceae* | *Salvia* | *miltiorrhiza* | Root |
| 492 | NPL-SUB-015 | *Apiaceae* | *Angelica* | *sinensis* | Root |
| 493 | NPL-SUB-016 | *Campanulaceae* | *Adenophora* | *remotiflora* | Root |
| 494 | NPL-SUB-017 | *Euphorbiaceae* | *Euphorbia* | *pekinensis* | Root |
| 495 | NPL-SUB-018 | *Polygonaceae* | *Rheum* | *palmatum* | Root |
| 496 | NPL-SUB-019 | *Apiaceae* | *Cnidium* | *officinale* | Root |
| 497 | NPL-SUB-020 | *Apiaceae* | *Angelica* | *pubescens* | Root |
| 498 | NPL-SUB-021 | *Araliaceae* | *Aralia* | *cordata* | Root |
| 499 | NPL-SUB-022 | *Eucommiaceae* | *Eucommia* | *ulmoides* | Rind |
| 500 | NPL-SUB-023 | *Dioscoreaceae* | *Dioscorea* | *oposita* | Root |
| 501 | NPL-SUB-024 | *Poaceae* | *Imperata* | *cylindrica* | Root |
| 502 | NPL-SUB-025 | *Urticaceae* | *Boehmeria* | *nivea* | Root |
| 503 | NPL-SUB-026 | *Asteraceae* | *Aucklandia* | *lappa* | Root |
| 504 | NPL-SUB-027 | *Asteraceae* | *Saussurea* | *costus* | Root |
| 505 | NPL-SUB-028 | *Menispermaceae* | *Stephania* | *tetrandra* | Root |
| 506 | NPL-SUB-029 | *Asparagaceae* | *Ledebouria* | *seseloides* | Root |
| 507 | NPL-SUB-030 | *Ranunculaceae* | *Pulsatilla* | *chinensis* | Root |
| 508 | NPL-SUB-031 | *Vitaceae* | *Ampelopsis* | *radix* | Root |
| 509 | NPL-SUB-032 | *Stemonaceae* | *Stemona* | *japonica* | Root |
| 510 | NPL-SUB-033 | *Paeoniaceae* | *Paeonia* | *lactiflora* | Root |
| 511 | NPL-SUB-034 | *Asclepiadaceae* | *Cynanchum* | *stauntonii* | Root |
| 512 | NPL-SUB-035 | *Apiaceae* | *Angelica* | *dahurica* | Root |
| 513 | NPL-SUB-036 | *Asteraceae* | *Atractylodes* | *macrocephala* | Root |
| 514 | NPL-SUB-037 | *Asteraceae* | *Rhaponticum* | *uniflorum* | Root |
| 515 | NPL-SUB-038 | *Zingiberaceae* | *Kaempferia* | *galanga* | Root |
| 516 | NPL-SUB-039 | *Dipsacaceae* | *Dipsacus* | *asper* | Root |
| 517 | NPL-SUB-040 | *Araliaceae* | *Panax* | *notoginseng* | Root |
| 518 | NPL-SUB-041 | *Araliaceae* | *Panax* | *notoginseng* | Root |
| 519 | NPL-SUB-042 | *Araliaceae* | *Panax* | *notoginseng* | Root |
| 520 | NPL-SUB-043 | *Phytolaccaceae* | *Phytolacca* | *acinosa* | Root |
| 521 | NPL-SUB-044 | *Polygonaceae* | *Polygonum* | *multiflorum* | Root |
| 522 | NPL-SUB-045 | *Acoraceae* | *Acorus* | *tatarinowii* | Root |
| 523 | NPL-SUB-046 | *Liliaceae* | *Ophiopogon* | *japonicus* | Root |
| 524 | NPL-SUB-047 | *Dipsacaceae* | *Dipsacus* | *asper* | Root |
| 525 | NPL-SUB-048 | *Apiaceae* | *Bupleurum* | *chinense* | Root |
| 526 | NPL-SUB-049 | *Ranunculaceae* | *Anemone* | *raddeana* | Root |
| 527 | NPL-SUB-050 | *Schisandraceae* | *Schisandra* | *chinensis* | Fruit |
| 528 | NPL-SUB-051 | *Zingiberaceae* | *Curcuma* | *longa* | Root |
| 529 | NPL-SUB-052 | *Asparagaceae* | *Polygonatum* | *sibiricum* | Root |
| 530 | NPL-SUB-053 | *Amaranthaceae* | *Achyranthes* | *bidentata* | Root |
| 531 | NPL-SUB-054 | *Amaranthaceae* | *Achyranthes* | *bidentata* | Root |
| 532 | NPL-SUB-055 | *Amaranthaceae* | *Achyranthes* | *bidentata* | Root |
| 533 | NPL-SUB-056 | *Polygalaceae* | *Polygala* | *tenuifolia* | Root |
| 534 | NPL-SUB-057 | *Ranunculaceae* | *Clematis* | *chinensis* | Root |
| 535 | NPL-SUB-058 | *Caryophyllaceae* | *Stellaria* | *media* | Root |
| 536 | NPL-SUB-059 | *Araliaceae* | *Panax* | *ginseng* | Root |
| 537 | NPL-SUB-060 | *Araliaceae* | *Panax* | *ginseng* | Root |
| 538 | NPL-SUB-061 | *Araliaceae* | *Panax* | *ginseng* | Root |
| 539 | NPL-SUB-062 | *Araliaceae* | *Panax* | *ginseng* | Root |
| 540 | NPL-SUB-063 | *Asteraceae* | *Aster* | *tataricus* | Root |
| 541 | NPL-SUB-064 | *Boraginaceae* | *Arnebia* | *euchroma* | Root |
| 542 | NPL-SUB-065 | *Paeoniaceae* | *Paeonia* | *lactiflora* | Root |
| 543 | NPL-SUB-066 | *Apiaceae* | *Anthriscus* | *sylvestris* | Root |
| 544 | NPL-SUB-067 | *Asparagaceae* | *Anemarrhena* | *asphodeloides* | Root |
| 545 | NPL-SUB-068 | *Asparagaceae* | *Anemarrhena* | *asphodeloides* | Root |
| 546 | NPL-SUB-069 | *Asparagaceae* | *Anemarrhena* | *asphodeloides* | Root |
| 547 | NPL-SUB-070 | *Asparagaceae* | *Anemarrhena* | *asphodeloides* | Root |
| 548 | NPL-SUB-071 | *Rosaceae* | *Sanguisorba* | *officinalis* | Root |
| 549 | NPL-SUB-072 | *Boraginaceae* | *Arnebia* | *euchroma* | Root |
| 550 | NPL-SUB-073 | *Asteraceae* | *Atractylodes* | *macrocephala* | Root |
| 551 | NPL-SUB-074 | *Apiaceae* | *Ligusticum* | *chuanxiong* | Root |
| 552 | NPL-SUB-075 | *Apiaceae* | *Ligusticum* | *chuanxiong* | Root |
| 553 | NPL-SUB-076 | *Apiaceae* | *Ligusticum* | *chuanxiong* | Root |
| 554 | NPL-SUB-077 | *Ranunculaceae* | *Semiaquilegia* | *adoxoides* | Root |
| 555 | NPL-SUB-078 | *Asparagaceae* | *Asparagus* | *cochinchinensis* | Root |
| 556 | NPL-SUB-079 | *Orchidaceae* | *Gastrodia* | *elata* | Root |
| 557 | NPL-SUB-080 | *Orchidaceae* | *Gastrodia* | *elata* | Root |
| 558 | NPL-SUB-081 | *Smilacaceae* | *Smilax* | *china* | Root |
| 559 | NPL-SUB-082 | *Smilacaceae* | *Smilax* | *china* | Root |
| 560 | NPL-SUB-083 | *Caryophyllaceae* | *Pseudostellaria* | *heterophylla* | Root |
| 561 | NPL-SUB-084 | *Caryophyllaceae* | *Pseudostellaria* | *heterophylla* | Root |
| 562 | NPL-SUB-085 | *Smilacaceae* | *Smilax* | *china* | Root |
| 563 | NPL-SUB-086 | *Cruciferae* | *Isatis* | *tinctoria* | Root |
| 564 | NPL-SUB-087 | *Zingiberaceae* | *Zingiber* | *-* | Root |
| 565 | NPL-SUB-088 | *Cyperaceae* | *Cyperus* | *rotundus* | Root |
| 566 | NPL-SUB-089 | *Scrophulariaceae* | *Scrophularia* | *ningpoensis* | Root |
| 567 | NPL-SUB-090 | *Poaceae* | *Phragmites* | *communis* | Root |
| 568 | NPL-SUB-091 | *Polygonaceae* | *Polygonum* | *cuspidatum* | Root |
| 569 | NPL-SUB-092 | *Scrophulariaceae* | *Picrorhiza* | *kurroa* | Root |
| 570 | NPL-SUB-093 | *Fabaceae* | *Hedysarum* | *polybotrys* | Root |
| 571 | NPL-SUB-094 | *Araliaceae* | *Panax* | *ginseng* | Root |
| 572 | NPL-SUB-095 | *Araliaceae* | *Panax* | *ginseng* | Root |
| 573 | NPL-SUB-096 | *Lamiaceae* | *Scutellaria* | *baicalensis* | Root |
| 574 | NPL-SUB-097 | *Fabaceae* | *Astragalus* | *membranaceus* | Root |
| 575 | NPL-SUB-098 | *Fabaceae* | *Astragalus* | *membranaceus* | Root |
| 576 | NPL-SUB-099 | *Fabaceae* | *Glycyrrhiza* | *uralensis* | Root |
| 577 | NPL-SUB-100 | *Fabaceae* | *Glycyrrhiza* | *uralensis* | Root |
| 578 | NPL-SUB-101 | *Fabaceae* | *Glycyrrhiza* | *uralensis* | Root |
| 579 | NPL-SUB-102 | *Fabaceae* | *Glycyrrhiza* | *uralensis* | Root |
| 580 | NPL-SUB-103 | *Fabaceae* | *Glycyrrhiza* | *uralensis* | Root |
| 581 | NPL-SUB-104 | *Fabaceae* | *Glycyrrhiza* | *uralensis* | Root |
| 582 | NPL-SUB-105 | *Fabaceae* | *Glycyrrhiza* | *uralensis* | Root |
| 583 | NPL-SUB-106 | *Fabaceae* | *Glycyrrhiza* | *uralensis* | Root |
| 584 | NPL-SUB-107 | *Fabaceae* | *Glycyrrhiza* | *uralensis* | Root |
| 585 | NPL-SUB-108 | *Fabaceae* | *Glycyrrhiza* | *uralensis* | Root |
| 586 | NPL-SUB-109 | *Fabaceae* | *Glycyrrhiza* | *uralensis* | Root |
| 587 | NPL-SUB-110 | *Fabaceae* | *Glycyrrhiza* | *uralensis* | Root |
| 588 | NPL-SUB-111 | *Fabaceae* | *Glycyrrhiza* | *uralensis* | Root |
| 589 | NPL-SUB-112 | *Fabaceae* | *Glycyrrhiza* | *uralensis* | Root |
| 590 | NPL-SUB-113 | *Fabaceae* | *Glycyrrhiza* | *uralensis* | Root |
| 591 | NPL-SUB-114 | *Fabaceae* | *Glycyrrhiza* | *uralensis* | Root |
| 592 | NPL-SUB-115 | *Fabaceae* | *Glycyrrhiza* | *uralensis* | Root |
| 593 | NPL-SUB-116 | *Fabaceae* | *Glycyrrhiza* | *uralensis* | Root |
| 594 | NPL-SUB-117 | *Fabaceae* | *Glycyrrhiza* | *uralensis* | Root |
| 595 | NPL-SUB-118 | *Fabaceae* | *Glycyrrhiza* | *uralensis* | Root |
| 596 | NPL-SUB-119 | *Fabaceae* | *Glycyrrhiza* | *uralensis* | Root |
| 597 | NPL-SUB-120 | *Fabaceae* | *Astragalus* | *membranaceus* | Root |
| 598 | NPL-SUB-121 | *Fabaceae* | *Astragalus* | *membranaceus* | Root |
| 599 | NPL-SUB-122 | *Fabaceae* | *Astragalus* | *membranaceus* | Root |
| 600 | NPL-SUB-123 | *Fabaceae* | *Astragalus* | *membranaceus* | Root |
| 601 | NPL-SUB-124 | *Fabaceae* | *Astragalus* | *membranaceus* | Root |
| 602 | NPL-SUB-125 | *Fabaceae* | *Astragalus* | *membranaceus* | Root |
| 603 | NPL-SUB-126 | *Fabaceae* | *Astragalus* | *membranaceus* | Root |
| 604 | NPL-SUB-127 | *Fabaceae* | *Astragalus* | *membranaceus* | Root |
| 605 | NPL-SUB-128 | *Fabaceae* | *Astragalus* | *membranaceus* | Root |
| 606 | NPL-SUB-129 | *Fabaceae* | *Astragalus* | *membranaceus* | Root |
| 607 | NPL-SUB-130 | *Fabaceae* | *Astragalus* | *membranaceus* | Root |
| 608 | NPL-SUB-131 | *Fabaceae* | *Astragalus* | *membranaceus* | Root |
| 609 | NPL-SUB-132 | *Fabaceae* | *Astragalus* | *membranaceus* | Root |
| 610 | NPL-SUB-133 | *Fabaceae* | *Astragalus* | *membranaceus* | Root |
| 611 | NPL-SUB-134 | *Fabaceae* | *Astragalus* | *membranaceus* | Root |
| 612 | NPL-SUB-135 | *Fabaceae* | *Astragalus* | *membranaceus* | Root |
| 613 | NPL-SUB-136 | *Fabaceae* | *Astragalus* | *membranaceus* | Root |
| 614 | NPL-SUB-137 | *Fabaceae* | *Astragalus* | *membranaceus* | Root |
| 615 | NPL-SUB-138 | *Fabaceae* | *Astragalus* | *membranaceus* | Root |
| 616 | NPL-SUB-139 | *Fabaceae* | *Astragalus* | *membranaceus* | Root |
| 617 | NPL-SUB-140 | *Fabaceae* | *Astragalus* | *membranaceus* | Root |
| 618 | NPL-SUB-141 | *Fabaceae* | *Astragalus* | *membranaceus* | Root |
| 619 | NPL-SUB-142 | *Fabaceae* | *Astragalus* | *membranaceus* | Root |
| 620 | NPL-SUB-143 | *Fabaceae* | *Astragalus* | *membranaceus* | Root |
| 621 | NPL-SUB-144 | *Zingiberaceae* | *Zingiber* | *officinale* | Root |
| 622 | NPL-SUB-145 | *Acoraceae* | *Acorus* | *tatarinowii* | Root |
| 623 | NPL-SUB-146 | *Polygonaceae* | *Rheum* | *palmatum* | Root |
| 624 | NPL-SUB-147 | *Ranunculaceae* | *Cimicifuga* | *foetida* | Root |
| 625 | NPL-SUB-148 | *Lauraceae* | *Cinnamomum* | *cassia* | Branch |
| 626 | NPL-SUB-149 | *Fabaceae* | *Glycyrrhiza* | *uralensis* | Root |
| 627 | NPL-SUB-150 | *Rosaceae* | *Prunus* | *persica* | Seed |
| 628 | NPL-SUB-151 | *Zingiberaceae* | *Alpinia* | *officinarum* | Root |
| 629 | NPL-SUB-152 | *Acoraceae* | *Acorus* | *calamus* | Root |
| 630 | NPL-SUB-153 | *Zingiberaceae* | *Curcuma* | *longa* | Root |
| 631 | NPL-SUB-154 | *Zingiberaceae* | *Curcuma* | *aromatica* | Root |
| 632 | NPL-SUB-155 | *Zingiberaceae* | *Zingiber* | *officinale* | Root |
| 633 | NPL-SUB-156 | *Zingiberaceae* | *Alpinia* | *officinarum* | Root |
| 634 | NPL-SUB-157 | *Acoraceae* | *Acorus* | *calamus* | Root |
| 635 | NPL-SUB-158 | *Zingiberaceae* | *Curcuma* | *longa* | Root |
| 636 | NPL-SUB-159 | *Zingiberaceae* | *Curcuma* | *aromatica* | Root |
| 637 | NPL-SUB-160 | *Zingiberaceae* | *Zingiber* | *officinale* | Root |
| 638 | NPL-SUB-161 | *Zingiberaceae* | *Alpinia* | *officinarum* | Root |
| 639 | NPL-SUB-162 | *Acoraceae* | *Acorus* | *calamus* | Root |
| 640 | NPL-SUB-163 | *Zingiberaceae* | *Curcuma* | *longa* | Root |
| 641 | NPL-SUB-164 | *Zingiberaceae* | *Curcuma* | *aromatica* | Root |
| 642 | NPL-SUB-165 | *Zingiberaceae* | *Zingiber* | *officinale* | Root |
| 643 | NPL-SUB-166 | *Zingiberaceae* | *Alpinia* | *officinarum* | Root |
| 644 | NPL-SUB-167 | *Acoraceae* | *Acorus* | *calamus* | Root |
| 645 | NPL-SUB-168 | *Zingiberaceae* | *Curcuma* | *longa* | Root |
| 646 | NPL-SUB-169 | *Zingiberaceae* | *Curcuma* | *aromatica* | Root |
| 647 | NPL-SUB-170 | *Zingiberaceae* | *Zingiber* | *officinale* | Root |
| 648 | NPL-SUB-171 | *Zingiberaceae* | *Alpinia* | *officinarum* | Root |
| 649 | NPL-SUB-172 | *Acoraceae* | *Acorus* | *calamus* | Root |
| 650 | NPL-SUB-173 | *Zingiberaceae* | *Curcuma* | *longa* | Root |
| 651 | NPL-SUB-174 | *Zingiberaceae* | *Curcuma* | *aromatica* | Root |
| 652 | NPL-SUB-175 | *Zingiberaceae* | *Zingiber* | *officinale* | Root |
| 653 | NPL-HBD-332 | *Apiaceae* | *Angelica* | *gigas* | Root |
| 654 | NPL-HBD-334 | *Apiaceae* | *Angelica* | *gigas* | Root |
| 655 | NPL-HBD-336 | *Apiaceae* | *Angelica* | *gigas* | Stems and leaves |
| 656 | NPL-HBD-338 | *Apiaceae* | *Angelica* | *gigas* | Stems and leaves |
