# Supplementary material for: Leveraging Metabolic Similarity in a ¹H NMR Database of Medicinal Plants: A Macroscopic Approach to Advancing Pharmacognostic Insights
Source: Research Square preprint supplement (doi:10.21203/rs.3.rs-6765662/v1), 2025-06-27
Supplement: Supplementary file 2 [file 5e9c0906e2148b5d3afe6f6b.docx]

**Table 2.** Distance to the model (DModX) values of *Glycyrrhiza* species in the model of soft independent model of class analogy (SIMCA) for the *Angelica* class and the distance of non-*Glycyrrhiza* samples having DModX < 1.28031 (Dcrit = 0.05).

| **No.** | **Primary ID** | **Genus** | **Species** | **M3. DModX [5] (Norm), Weighted residuals** |
| --- | --- | --- | --- | --- |
| 1 | NPL-KIOM-003 | *Glycyrrhiza* | *glabra* | 1.60065 |
| 2 | NPL-KIOM-004 | *Glycyrrhiza* | *inflata* | 1.72332 |
| 3 | NPL-KIOM-005 | *Glycyrrhiza* | *uralensis* | 2.47028 |
| 4 | NPL-NPL-014 | *Glycyrrhiza* | *glabra* | 0.209195 |
| 5 | NPL-NPL-015 | *Glycyrrhiza* | *glabra* | 0.583945 |
| 6 | NPL-RDA-013 | *Glycyrrhiza* | *uralensis* | 0.582314 |
| 7 | NPL-SUB-099 | *Glycyrrhiza* | *uralensis* | 1.12873 |
| 8 | NPL-SUB-100 | *Glycyrrhiza* | *uralensis* | 0.77614 |
| 9 | NPL-SUB-101 | *Glycyrrhiza* | *uralensis* | 0.781782 |
| 10 | NPL-SUB-102 | *Glycyrrhiza* | *uralensis* | 0.967299 |
| 11 | NPL-SUB-103 | *Glycyrrhiza* | *uralensis* | 1.02192 |
| 12 | NPL-SUB-104 | *Glycyrrhiza* | *uralensis* | 0.870343 |
| 13 | NPL-SUB-105 | *Glycyrrhiza* | *uralensis* | 0.695624 |
| 14 | NPL-SUB-106 | *Glycyrrhiza* | *uralensis* | 0.980659 |
| 15 | NPL-SUB-107 | *Glycyrrhiza* | *uralensis* | 1.10028 |
| 16 | NPL-SUB-108 | *Glycyrrhiza* | *uralensis* | 1.05198 |
| 17 | NPL-SUB-109 | *Glycyrrhiza* | *uralensis* | 0.764558 |
| 18 | NPL-SUB-110 | *Glycyrrhiza* | *uralensis* | 0.786217 |
| 19 | NPL-SUB-111 | *Glycyrrhiza* | *uralensis* | 0.553723 |
| 20 | NPL-SUB-112 | *Glycyrrhiza* | *uralensis* | 0.747157 |
| 21 | NPL-SUB-113 | *Glycyrrhiza* | *uralensis* | 0.582447 |
| 22 | NPL-SUB-114 | *Glycyrrhiza* | *uralensis* | 0.954206 |
| 23 | NPL-SUB-115 | *Glycyrrhiza* | *uralensis* | 0.611436 |
| 24 | NPL-SUB-116 | *Glycyrrhiza* | *uralensis* | 0.710566 |
| 25 | NPL-SUB-117 | *Glycyrrhiza* | *uralensis* | 0.680215 |
| 26 | NPL-SUB-118 | *Glycyrrhiza* | *uralensis* | 0.779586 |
| 27 | NPL-SUB-119 | *Glycyrrhiza* | *uralensis* | 0.622515 |

Outliers are marked and defined as samples with DModX values exceeding the 95% confidence threshold (Dcrit = 0.05), based on SIMCA analysis (DModX < 1.28031).
