# Supplementary material for: Leveraging Metabolic Similarity in a ¹H NMR Database of Medicinal Plants: A Macroscopic Approach to Advancing Pharmacognostic Insights
Source: Research Square preprint supplement (doi:10.21203/rs.3.rs-6765662/v1), 2025-06-27
Supplement: Supplementary file 3 [file ac5f3c2e41432272659fc00f.xlsx]

## Sheet: 1H NMR bucket data
No.	Sample Code	Family	Genus	Species	Used part	a1	a2	a3	a4	a5	a6	a7	a8	a9	a10	a11	a12	a13	a14	a15	a16	a17	a18	a19	a20	a21	a22	a23	a24	a25	a26	a27	a28	a29	a30	a31	a32	a33	a34	a35	a36	a37	a38	a39	a40	a41	a42	a43	a44
						10	9.96	9.92	9.88	9.84	9.8	9.76	9.72	9.68	9.64	9.6	9.56	9.52	9.48	9.44	9.4	9.36	9.32	9.28	9.24	9.2	9.16	9.12	9.08	9.04	9	8.96	8.92	8.88	8.84	8.8	8.76	8.72	8.68	8.64	8.6	8.56	8.52	8.48	8.44	8.4	8.36	8.32	8.28
1	NPL-KHU-001	Fabaceae	Pueraria	lobata	Root	0.00000564	0.00001045	0.00000433	0.00000601	0.00000505	0.00000477	0.00000275	0.00000893	0.00000478	0.00000769	0.00000388	0.00000607	0.00000797	0.00001614	0.00000392	0.00000557	0.00000475	0.00000620	0.00000769	0.00000387	0.00000507	0.00006703	0.00001631	0.00000401	0.00000598	0.00000363	0.00001225	0.00000673	0.00007227	0.00008966	0.00000672	0.00001159	0.00001646	0.00001930	0.00002661	0.00004157	0.00005138	0.00007893	0.00063134	0.00010235	0.00019436	0.00016868	0.00044167	0.00430743
2	NPL-KHU-002	Zingiberaceae	Curcuma	longa	Root	0.00002824	0.00002082	0.00001305	0.00003380	0.00001537	0.00001195	0.00010707	0.00019989	0.00001960	0.00000936	0.00001253	0.00000748	0.00002408	0.00003261	0.00007340	0.00009711	0.00004671	0.00002569	0.00001240	0.00001425	0.00001176	0.00000660	0.00001985	0.00000436	0.00002028	0.00000945	0.00004123	0.00000473	0.00000254	0.00000235	0.00000246	0.00001045	0.00001571	0.00000322	0.00002146	0.00004448	0.00002395	0.00002368	0.00237554	0.00002711	0.00001513	0.00000946	0.00001458	0.00003532
3	NPL-KHU-003	Zingiberaceae	Zingiber	officinale	Root	0.00000695	0.00000285	0.00000873	0.00000470	0.00000301	0.00000215	0.00001120	0.00006191	0.00000667	0.00000301	0.00000200	0.00000121	0.00000722	0.00000468	0.00000244	0.00003312	0.00004813	0.00002626	0.00000204	0.00000349	0.00000250	0.00000142	0.00000728	0.00000583	0.00001061	0.00001400	0.00004316	0.00000698	0.00000272	0.00000842	0.00001168	0.00011440	0.00005183	0.00003585	0.00014568	0.00013858	0.00023503	0.00019090	0.00587197	0.00010287	0.00006787	0.00005605	0.00003624	0.00007174
4	NPL-KHU-004	Anacardiaceae	Rhus	verniciflua	Rind	0.00003182	0.00002028	0.00002692	0.00002387	0.00002815	0.00003307	0.00002539	0.00005461	0.00004136	0.00002499	0.00001917	0.00001370	0.00002842	0.00002459	0.00002151	0.00003106	0.00002669	0.00001720	0.00001548	0.00000944	0.00000733	0.00001895	0.00001003	0.00000730	0.00000546	0.00001383	0.00001072	0.00000742	0.00001500	0.00001599	0.00000485	0.00000840	0.00000561	0.00000542	0.00000795	0.00000752	0.00000827	0.00000206	0.00131081	0.00004575	0.00000456	0.00004496	0.00000560	0.00000603
5	NPL-KHU-005	Nymphaeaceae	Euryale	ferox	Seed	0.00038242	0.00024984	0.00065331	0.00068645	0.00075533	0.00054689	0.00055623	0.00058303	0.00050643	0.00093699	0.00055685	0.00049094	0.00052255	0.00050416	0.00065701	0.00081871	0.00068395	0.00078958	0.00047225	0.00091303	0.00047731	0.00062204	0.00061704	0.00041765	0.00076680	0.00066811	0.00063771	0.00057929	0.00061718	0.00060014	0.00076730	0.00078162	0.00046585	0.00070071	0.00073254	0.00102761	0.00076981	0.00082785	0.00779730	0.00060698	0.00043973	0.00077767	0.00054606	0.00048371
6	NPL-KHU-006	Lauraceae	Cinnamomum	cassia	Rind	0.00003851	0.00021350	0.00003360	0.00003188	0.00011589	0.00003721	0.00018159	0.00023436	0.00029517	0.01392192	0.01449530	0.00374692	0.00014267	0.00021550	0.00006020	0.00005258	0.00008651	0.00004114	0.00003518	0.00004287	0.00002796	0.00001701	0.00001873	0.00001472	0.00002375	0.00001354	0.00001930	0.00001646	0.00000915	0.00000783	0.00001351	0.00000787	0.00001270	0.00001070	0.00000708	0.00001099	0.00000793	0.00000828	0.00146315	0.00010675	0.00001168	0.00002233	0.00000461	0.00000724
7	NPL-KHU-007	Lauraceae	Cinnamomum	cassia	Rind	0.00002594	0.00005265	0.00001874	0.00001142	0.00019781	0.00000509	0.00019610	0.00023221	0.00003340	0.01981669	0.02129910	0.00331504	0.00025013	0.00037275	0.00008843	0.00007282	0.00008905	0.00004205	0.00003789	0.00002743	0.00002125	0.00001518	0.00000438	0.00001208	0.00001045	0.00000660	0.00000516	0.00000543	0.00000965	0.00000812	0.00000815	0.00000247	0.00000098	0.00000446	0.00000204	0.00000093	0.00000126	0.00000036	0.00108576	0.00000697	0.00000022	0.00000000	0.00000000	0.00000023
8	NPL-KHU-008	Zingiberaceae	Alpinia	officinarum	Root	0.00001408	0.00002750	0.00001065	0.00001592	0.00002058	0.00000887	0.00002153	0.00004780	0.00004019	0.00001506	0.00001234	0.00001873	0.00000733	0.00002015	0.00001275	0.00001013	0.00003296	0.00005683	0.00001197	0.00000592	0.00000651	0.00000534	0.00000831	0.00000736	0.00000243	0.00000695	0.00000418	0.00001567	0.00001334	0.00000241	0.00001524	0.00019612	0.00015972	0.00001721	0.00037197	0.00002193	0.00025426	0.00010109	0.00291950	0.00032366	0.00006480	0.00001564	0.00000299	0.00002145
9	NPL-KHU-009	Fabaceae	Sophora	flavescens	Root	0.00002055	0.00002273	0.00001434	0.00001197	0.00000385	0.00001889	0.00001246	0.00002040	0.00001228	0.00000616	0.00001319	0.00000862	0.00001259	0.00000763	0.00000515	0.00000958	0.00001207	0.00001609	0.00000710	0.00000836	0.00000172	0.00001121	0.00000308	0.00000653	0.00000626	0.00000443	0.00000875	0.00000506	0.00000193	0.00000232	0.00000564	0.00001056	0.00000619	0.00000292	0.00000485	0.00000496	0.00000438	0.00000354	0.00055230	0.00000766	0.00000429	0.00000351	0.00027424	0.00016090
10	NPL-KHU-010	Viscaceae	Viscum	coloratum	Whole plant	0.00001137	0.00001412	0.00001071	0.00000920	0.00001127	0.00001249	0.00001303	0.00001457	0.00001478	0.00000459	0.00001467	0.00001354	0.00000956	0.00000842	0.00000563	0.00000819	0.00001249	0.00000927	0.00000371	0.00000134	0.00000285	0.00000228	0.00000498	0.00001719	0.00000980	0.00001063	0.00000641	0.00000171	0.00000102	0.00000055	0.00000289	0.00000050	0.00000411	0.00000282	0.00000059	0.00001232	0.00000254	0.00000508	0.00071190	0.00000841	0.00000000	0.00000655	0.00000089	0.00000033
11	NPL-KHU-011	Poaceae	Oryza	sativa	Seed	0.00007021	0.00006964	0.00004825	0.00005131	0.00007420	0.00004366	0.00009035	0.00002385	0.00005135	0.00003612	0.00006475	0.00005556	0.00005165	0.00006066	0.00003031	0.00008063	0.00007710	0.00004518	0.00007168	0.00009029	0.00008119	0.00008853	0.00005777	0.00005657	0.00005778	0.00003073	0.00007926	0.00005411	0.00004466	0.00003819	0.00004251	0.00008862	0.00006693	0.00007124	0.00005664	0.00002740	0.00007052	0.00004953	0.00192590	0.00004582	0.00003518	0.00005309	0.00003310	0.00005309
12	NPL-KHU-012	Laminariaceae	Laminaria	japonica	Whole plant	0.00001541	0.00002608	0.00001955	0.00002519	0.00001571	0.00002177	0.00002692	0.00001552	0.00002286	0.00003080	0.00001939	0.00001725	0.00002807	0.00002463	0.00002157	0.00002319	0.00003035	0.00001435	0.00001641	0.00002393	0.00002007	0.00002117	0.00001731	0.00001836	0.00002443	0.00001907	0.00001734	0.00001877	0.00001633	0.00001560	0.00002834	0.00001565	0.00001505	0.00001945	0.00001068	0.00002366	0.00002118	0.00003489	0.00005148	0.00054522	0.00001134	0.00002535	0.00001855	0.00002724
13	NPL-KHU-013	Lamiaceae	Agastache	rugosa	Whole plant	0.00001030	0.00000613	0.00000295	0.00000147	0.00000409	0.00001954	0.00002552	0.00020874	0.00001628	0.00002135	0.00002309	0.00000472	0.00004752	0.00000494	0.00000641	0.00000993	0.00006954	0.00001522	0.00000613	0.00000152	0.00000046	0.00000118	0.00002103	0.00000017	0.00001647	0.00001346	0.00002276	0.00000599	0.00000243	0.00000304	0.00000225	0.00000044	0.00002009	0.00000237	0.00005482	0.00004951	0.00005662	0.00006655	0.00280438	0.00013401	0.00001233	0.00001385	0.00001608	0.00004791
14	NPL-KHU-014	Fabaceae	Sophora	japonica	Flower, Seed	0.00000437	0.00000457	0.00000316	0.00000090	0.00000217	0.00000231	0.00000258	0.00000149	0.00000157	0.00000010	0.00000077	0.00000016	0.00000067	0.00000021	0.00000025	0.00000246	0.00000214	0.00000342	0.00000010	0.00000002	0.00000003	0.00163507	0.00001482	0.00000001	0.00000001	0.00000189	0.00000104	0.00000000	0.00213910	0.00121577	0.00000230	0.00007979	0.00006764	0.00000393	0.00012248	0.00001780	0.00013935	0.00001898	0.00074044	0.00003252	0.00002936	0.00000582	0.00000005	0.00000071
15	NPL-KHU-015	Celastraceae	Euonymus	alatus	Rind	0.00002328	0.00003127	0.00002667	0.00003131	0.00001904	0.00004221	0.00002905	0.00009394	0.00003082	0.00002464	0.00001722	0.00003948	0.00003650	0.00004269	0.00003528	0.00003367	0.00003220	0.00003335	0.00005124	0.00002142	0.00001482	0.00001201	0.00001353	0.00000450	0.00000517	0.00002049	0.00004147	0.00001929	0.00002038	0.00001194	0.00001098	0.00000750	0.00001054	0.00000645	0.00000587	0.00002516	0.00000999	0.00000854	0.00139661	0.00005941	0.00000275	0.00000754	0.00000169	0.00001255
16	NPL-KHU-016	Rosaceae	Rosa	laevigata	Fruit	0.00001679	0.00001146	0.00001170	0.00001231	0.00001382	0.00001201	0.00001214	0.00001318	0.00001298	0.00000592	0.00001143	0.00000773	0.00000957	0.00001263	0.00000976	0.00000682	0.00000788	0.00000822	0.00000307	0.00000365	0.00000452	0.00000621	0.00000334	0.00000132	0.00000210	0.00000101	0.00000313	0.00000076	0.00000185	0.00000103	0.00000139	0.00000019	0.00000013	0.00000012	0.00000117	0.00000039	0.00000019	0.00000138	0.00064846	0.00000403	0.00000000	0.00000000	0.00000018	0.00000000
17	NPL-KHU-017	Balsaminaceae	Impatiens	balsamina	Whole plant	0.00005193	0.00005330	0.00004550	0.00002201	0.00005367	0.00004521	0.00007037	0.00005280	0.00005599	0.00004951	0.00002860	0.00006239	0.00016393	0.00038266	0.00029450	0.00010508	0.00004599	0.00039550	0.00002707	0.00002053	0.00001935	0.00001440	0.00003227	0.00001916	0.00003287	0.00000503	0.00002495	0.00001418	0.00001349	0.00000976	0.00000847	0.00000738	0.00000832	0.00000680	0.00001293	0.00003047	0.00001698	0.00003340	0.00461335	0.00000699	0.00000244	0.00001800	0.00005858	0.00012803
18	NPL-KHU-018	Poaceae	Oryza	sativa	Seed	0.00018578	0.00011443	0.00015617	0.00009255	0.00017399	0.00019785	0.00052001	0.00056811	0.00011450	0.00010702	0.00005960	0.00018699	0.00014819	0.00013867	0.00013646	0.00004894	0.00012789	0.00006938	0.00014288	0.00010894	0.00006055	0.00010918	0.00008288	0.00011683	0.00007864	0.00012286	0.00012903	0.00008682	0.00007641	0.00006092	0.00010167	0.00009284	0.00010192	0.00006685	0.00012848	0.00012981	0.00013957	0.00017384	0.00503328	0.00019186	0.00013829	0.00016079	0.00013119	0.00020431
19	NPL-KHU-019	Fabaceae	Vigna	radiatus	Seed	0.00005134	0.00004784	0.00005590	0.00004862	0.00003865	0.00006747	0.00005294	0.00004642	0.00004437	0.00003899	0.00004451	0.00002674	0.00005752	0.00006218	0.00006034	0.00003670	0.00004088	0.00005455	0.00006156	0.00004914	0.00005606	0.00207503	0.00005503	0.00003031	0.00006953	0.00009241	0.00005408	0.00009139	0.00299699	0.00121677	0.00004662	0.00003945	0.00004209	0.00006908	0.00004068	0.00005654	0.00010812	0.00007889	0.00091374	0.00004805	0.00001140	0.00009447	0.00003858	0.00005000
20	NPL-KHU-020	Lamiaceae	Salvia	miltiorrhiza	Root	0.00000154	0.00000137	0.00000029	0.00000022	0.00000078	0.00000084	0.00000073	0.00000052	0.00000738	0.00000099	0.00000061	0.00000170	0.00000123	0.00001367	0.00000554	0.00001234	0.00008078	0.00003569	0.00000300	0.00000089	0.00000002	0.00000014	0.00000344	0.00000020	0.00000144	0.00000185	0.00000003	0.00000004	0.00000089	0.00000000	0.00000006	0.00000255	0.00007532	0.00000017	0.00011180	0.00000083	0.00003525	0.00007972	0.00008675	0.00089805	0.00001682	0.00000150	0.00000000	0.00000000
21	NPL-KHU-021	Poaceae	Lophatherum	gracile	Whole plant	0.00003372	0.00002811	0.00004036	0.00002414	0.00002002	0.00002533	0.00002792	0.00002631	0.00004460	0.00001670	0.00002280	0.00001842	0.00002396	0.00002763	0.00004370	0.00003819	0.00002473	0.00001762	0.00001552	0.00001929	0.00000878	0.00003839	0.00000881	0.00000989	0.00000769	0.00000482	0.00001897	0.00000489	0.00002480	0.00001495	0.00000132	0.00000178	0.00000649	0.00000468	0.00000397	0.00000310	0.00000225	0.00000019	0.00102193	0.00000852	0.00000030	0.00000872	0.00000066	0.00000251
22	NPL-KHU-022	Apiaceae	Angelica	gigas	Root	0.00000154	0.00000205	0.00000117	0.00000095	0.00000230	0.00000229	0.00000381	0.00000266	0.00000237	0.00000157	0.00000041	0.00000041	0.00000084	0.00000059	0.00000095	0.00000035	0.00001683	0.00000470	0.00000077	0.00000001	0.00000003	0.00000003	0.00000763	0.00000006	0.00000742	0.00000014	0.00000615	0.00000009	0.00000003	0.00000013	0.00000000	0.00000007	0.00000005	0.00000000	0.00000013	0.00000180	0.00001932	0.00000217	0.00046789	0.00000067	0.00000215	0.00001942	0.00000481	0.00000874
23	NPL-KHU-023	Polygonaceae	Rheum	palmatum	Root	0.00002136	0.00001811	0.00001497	0.00001137	0.00001125	0.00000948	0.00000839	0.00001107	0.00000857	0.00000884	0.00000855	0.00000449	0.00000695	0.00000254	0.00000365	0.00000046	0.00000182	0.00000046	0.00000130	0.00000000	0.00000055	0.00000169	0.00000261	0.00000003	0.00000000	0.00000000	0.00000000	0.00000000	0.00000000	0.00000000	0.00000000	0.00000000	0.00000015	0.00000000	0.00000821	0.00000000	0.00000006	0.00000000	0.00081607	0.00000000	0.00000000	0.00000000	0.00000000	0.00000000
24	NPL-KHU-024	Cucurbitaceae	Benincasa	cerifera	Fruit	0.00000744	0.00001740	0.00001178	0.00000930	0.00001307	0.00002217	0.00002933	0.00002037	0.00003071	0.00001313	0.00000819	0.00001253	0.00000996	0.00001205	0.00000366	0.00001001	0.00002605	0.00002327	0.00000822	0.00000825	0.00000259	0.00018515	0.00000590	0.00000717	0.00000875	0.00003898	0.00010858	0.00003424	0.00026968	0.00021490	0.00006270	0.00020647	0.00061560	0.00007710	0.00046737	0.00013256	0.00046841	0.00039560	0.00175093	0.00009019	0.00012985	0.00004745	0.00000936	0.00008044
25	NPL-KHU-025	Fabaceae	Glycine	max	Seed	0.00000694	0.00000881	0.00000412	0.00000491	0.00000227	0.00000624	0.00000565	0.00000520	0.00000607	0.00000629	0.00000367	0.00000393	0.00000072	0.00000325	0.00000993	0.00000718	0.00001022	0.00000393	0.00000430	0.00000111	0.00000614	0.00006939	0.00000325	0.00000520	0.00000747	0.00000497	0.00002446	0.00000883	0.00010609	0.00004501	0.00000465	0.00000610	0.00001892	0.00001250	0.00003400	0.00004468	0.00013110	0.00011281	0.00147528	0.00010443	0.00010565	0.00016009	0.00017802	0.00024274
26	NPL-KHU-026	Rosaceae	Rosa	rugosa	Fruit	0.00001431	0.00001632	0.00001067	0.00000895	0.00000431	0.00001142	0.00000612	0.00000807	0.00000312	0.00000275	0.00000317	0.00000356	0.00000422	0.00000446	0.00000174	0.00000470	0.00001098	0.00001208	0.00000067	0.00000034	0.00000003	0.00001631	0.00002595	0.00000004	0.00000000	0.00000005	0.00000897	0.00000011	0.00001327	0.00002426	0.00000000	0.00000000	0.00000094	0.00000000	0.00000081	0.00000000	0.00000436	0.00000001	0.00111003	0.00000093	0.00000000	0.00003442	0.00000009	0.00000000
27	NPL-KHU-027	Malvaceae	Hibiscus	syriacus	Flower	0.00002138	0.00001667	0.00001565	0.00001105	0.00001280	0.00001813	0.00002410	0.00002864	0.00001282	0.00000946	0.00000978	0.00000853	0.00001360	0.00000904	0.00001677	0.00001098	0.00002821	0.00000865	0.00008038	0.00006767	0.00006952	0.00002292	0.00000323	0.00000269	0.00000215	0.00000770	0.00013949	0.00010313	0.00001212	0.00001448	0.00000493	0.00000302	0.00001032	0.00000466	0.00001694	0.00001216	0.00000605	0.00001020	0.00097627	0.00002581	0.00000398	0.00001157	0.00000752	0.00003764
28	NPL-KHU-028	Paeoniaceae	Paeonia	suffruticosa	Root	0.00002316	0.00002262	0.00001959	0.00001633	0.00001349	0.00001299	0.00001711	0.00002251	0.00001245	0.00001300	0.00001263	0.00001334	0.00001874	0.00006398	0.00001365	0.00000957	0.00002233	0.00002641	0.00001163	0.00000511	0.00000459	0.00000672	0.00000420	0.00000327	0.00000081	0.00000178	0.00000183	0.00000061	0.00000078	0.00000044	0.00000018	0.00000003	0.00000064	0.00000003	0.00000002	0.00000009	0.00000000	0.00000000	0.00028842	0.00000000	0.00000000	0.00000651	0.00000000	0.00000000
29	NPL-KHU-029	Cucurbitaceae	Momordica	cochinchinensis	Fruit	0.00010411	0.00010031	0.00010218	0.00009006	0.00007599	0.00009841	0.00008807	0.00012277	0.00040852	0.00011596	0.00010476	0.00012676	0.00050896	0.00037041	0.00123730	0.00028430	0.00008986	0.00011052	0.00015622	0.00010143	0.00011569	0.00009738	0.00011589	0.00006983	0.00007552	0.00008280	0.00008228	0.00012636	0.00010495	0.00011595	0.00006159	0.00009678	0.00009231	0.00006045	0.00009154	0.00009255	0.00009642	0.00010467	0.00588714	0.00007851	0.00006001	0.00005762	0.00008102	0.00006049
30	NPL-KHU-030	Actinidiaceae	Actinidia	polygama	Fruit	0.00000667	0.00000588	0.00000823	0.00002590	0.00000818	0.00000572	0.00000681	0.00000827	0.00003037	0.00015572	0.00000624	0.00000275	0.00000232	0.00000942	0.00000926	0.00000643	0.00003354	0.00004079	0.00000572	0.00000328	0.00000128	0.00005413	0.00000100	0.00000145	0.00000075	0.00000143	0.00000748	0.00000340	0.00004579	0.00005543	0.00000380	0.00000405	0.00000547	0.00000640	0.00004970	0.00007648	0.00009694	0.00010675	0.00150284	0.00074345	0.00010892	0.00009124	0.00007062	0.00006750
31	NPL-KHU-031	Lamiaceae	Mentha	arvensis	Leaf	0.00002109	0.00001024	0.00002152	0.00002071	0.00001607	0.00004370	0.00002277	0.00005146	0.00005655	0.00001776	0.00001912	0.00002441	0.00002214	0.00002190	0.00001953	0.00003050	0.00007103	0.00008022	0.00001439	0.00001153	0.00000823	0.00000512	0.00001361	0.00000624	0.00000450	0.00000764	0.00000950	0.00002900	0.00000606	0.00000470	0.00000819	0.00001038	0.00006178	0.00000425	0.00006638	0.00001506	0.00003442	0.00005139	0.00164244	0.00009249	0.00000695	0.00001497	0.00000910	0.00003371
32	NPL-KHU-032	Lamiaceae	Scutellaria	barbata	Whole plant	0.00001693	0.00001964	0.00001419	0.00003010	0.00001802	0.00001935	0.00004865	0.00003506	0.00002924	0.00001405	0.00001350	0.00005030	0.00004820	0.00008087	0.00001293	0.00004173	0.00002614	0.00003295	0.00001278	0.00001916	0.00001876	0.00125112	0.00002144	0.00003403	0.00001101	0.00000824	0.00004478	0.00002640	0.00132263	0.00109739	0.00004048	0.00001219	0.00002162	0.00002751	0.00003899	0.00004995	0.00002284	0.00002878	0.00080161	0.00003573	0.00001630	0.00001948	0.00002219	0.00007020
33	NPL-KHU-033	Araceae	Pinellia	ternata	Root	0.00003234	0.00004037	0.00003826	0.00002842	0.00004631	0.00004089	0.00003310	0.00003687	0.00004374	0.00003537	0.00003627	0.00003650	0.00004375	0.00010253	0.00003767	0.00003729	0.00010504	0.00011257	0.00004535	0.00003478	0.00001887	0.00005004	0.00000800	0.00001502	0.00000880	0.00002074	0.00004333	0.00003880	0.00003460	0.00003339	0.00002046	0.00002181	0.00002854	0.00002059	0.00003271	0.00002449	0.00005499	0.00002250	0.00241979	0.00007046	0.00004867	0.00006115	0.00003506	0.00010269
34	NPL-KHU-034	Menispermaceae	Sinomenium	acutum	Root	0.00000516	0.00001117	0.00000293	0.00000379	0.00000560	0.00000878	0.00001110	0.00001741	0.00003702	0.00002025	0.00003672	0.00006507	0.00003500	0.00003572	0.00000722	0.00000565	0.00001559	0.00000797	0.00000449	0.00002443	0.00000739	0.00001797	0.00000575	0.00000829	0.00000448	0.00000250	0.00000560	0.00001020	0.00001289	0.00001531	0.00000746	0.00000867	0.00000903	0.00004384	0.00001256	0.00005264	0.00009558	0.00001491	0.00026359	0.00042337	0.00005335	0.00002222	0.00003060	0.00002877
35	NPL-KHU-035	Ginkgoaceae	Ginkgo	biloba	Leaf	0.00001905	0.00001857	0.00002534	0.00002209	0.00002584	0.00002194	0.00002364	0.00002439	0.00001971	0.00002006	0.00002060	0.00001621	0.00001429	0.00002028	0.00001928	0.00004010	0.00004811	0.00006935	0.00002444	0.00000875	0.00001420	0.00004523	0.00002017	0.00000916	0.00000793	0.00001485	0.00005604	0.00003244	0.00008781	0.00004455	0.00003322	0.00007654	0.00006113	0.00001918	0.00010184	0.00003906	0.00009678	0.00003145	0.00110591	0.00005664	0.00003730	0.00003264	0.00001638	0.00004526
36	NPL-KHU-036	Cupressaceae	Platycladus	orientalis	Seed, Leaf	0.00002256	0.00002228	0.00002210	0.00002611	0.00003467	0.00002155	0.00003095	0.00002841	0.00003574	0.00002764	0.00002413	0.00002328	0.00003007	0.00002245	0.00002450	0.00003244	0.00003070	0.00002887	0.00002459	0.00002280	0.00001696	0.00003386	0.00001691	0.00002305	0.00001898	0.00002289	0.00002824	0.00003107	0.00002705	0.00001631	0.00001761	0.00002657	0.00003207	0.00001923	0.00002838	0.00002987	0.00003899	0.00003935	0.00056497	0.00002196	0.00002947	0.00005175	0.00002772	0.00004103
37	NPL-KHU-037	Paeoniaceae	Paeonia	japonica	Root	0.00000453	0.00000547	0.00000455	0.00000600	0.00000785	0.00000373	0.00000827	0.00001451	0.00000964	0.00000457	0.00000397	0.00000719	0.00000529	0.00000761	0.00001224	0.00000718	0.00002667	0.00008976	0.00000635	0.00000382	0.00000735	0.00000908	0.00000790	0.00000669	0.00000556	0.00001017	0.00002360	0.00000531	0.00000701	0.00000787	0.00000956	0.00001069	0.00002609	0.00000626	0.00001010	0.00001300	0.00001861	0.00003193	0.00120055	0.00001132	0.00001738	0.00015420	0.00004413	0.00005974
38	NPL-KHU-038	Rubiaceae	Oldenlandia	herbacea	Whole plant	0.00001139	0.00001066	0.00001513	0.00001244	0.00001150	0.00001506	0.00002738	0.00003234	0.00001644	0.00000837	0.00001815	0.00002412	0.00001795	0.00001469	0.00000333	0.00001856	0.00002722	0.00001726	0.00001215	0.00000097	0.00000185	0.00000813	0.00000603	0.00000222	0.00000494	0.00001548	0.00000561	0.00000961	0.00000481	0.00000639	0.00000477	0.00000377	0.00004798	0.00000863	0.00002083	0.00000800	0.00000456	0.00002735	0.00088434	0.00043433	0.00001738	0.00003386	0.00011106	0.00035159
39	NPL-KHU-039	Poaceae	Triticum	aestivum	Seed	0.00006341	0.00002980	0.00003652	0.00004006	0.00003987	0.00003301	0.00004008	0.00004501	0.00005836	0.00005270	0.00004780	0.00003965	0.00005395	0.00003790	0.00004246	0.00004340	0.00004443	0.00002954	0.00002726	0.00004082	0.00003105	0.00009950	0.00004663	0.00004007	0.00002879	0.00003083	0.00005379	0.00002454	0.00007297	0.00005976	0.00004171	0.00005495	0.00004923	0.00002856	0.00005755	0.00003771	0.00004746	0.00003966	0.00134175	0.00004151	0.00003774	0.00009496	0.00005608	0.00005907
40	NPL-KHU-040	Lemnaceae	Spirodela	polyrhiza	Whole plant	0.00001226	0.00000881	0.00000399	0.00001111	0.00000936	0.00001544	0.00001407	0.00001679	0.00001641	0.00000897	0.00001491	0.00001480	0.00000702	0.00000259	0.00000525	0.00002046	0.00009704	0.00001274	0.00001039	0.00000824	0.00000403	0.00000818	0.00006992	0.00000221	0.00005252	0.00001772	0.00006329	0.00000770	0.00001379	0.00000627	0.00000459	0.00004662	0.00024822	0.00000760	0.00016252	0.00006458	0.00016833	0.00016317	0.00182960	0.00015106	0.00006566	0.00003515	0.00001321	0.00003609
41	NPL-KHU-041	Dioscoreaceae	Dioscorea	tokoro	Root	0.00001087	0.00001432	0.00001827	0.00001280	0.00001354	0.00001560	0.00001734	0.00002147	0.00001284	0.00001438	0.00001532	0.00001765	0.00001351	0.00000968	0.00001247	0.00001698	0.00001681	0.00003492	0.00000907	0.00001373	0.00000888	0.00003564	0.00000674	0.00000496	0.00000969	0.00000505	0.00001090	0.00001226	0.00002259	0.00002250	0.00000064	0.00000447	0.00000314	0.00000103	0.00000053	0.00000127	0.00000462	0.00001596	0.00033218	0.00009220	0.00000424	0.00000148	0.00000016	0.00000036
42	NPL-KHU-042	Arecaceae	Areca	catechu	Seed	0.00002892	0.00001931	0.00003567	0.00003126	0.00001575	0.00003516	0.00002480	0.00004991	0.00008019	0.00002532	0.00002462	0.00004070	0.00003897	0.00002411	0.00001717	0.00002445	0.00002916	0.00002575	0.00001932	0.00001340	0.00002083	0.00007876	0.00023207	0.00001602	0.00003057	0.00002585	0.00001946	0.00003863	0.00014508	0.00024271	0.00007822	0.00002308	0.00002167	0.00001760	0.00003477	0.00001366	0.00001316	0.00002463	0.00181700	0.00001943	0.00001196	0.00002755	0.00002297	0.00000626
43	NPL-KHU-043	Cucurbitaceae	Cucumis	melo	Fruit	0.00000655	0.00000319	0.00000146	0.00000573	0.00000819	0.00000675	0.00000639	0.00000668	0.00000903	0.00000697	0.00000373	0.00001180	0.00000386	0.00000393	0.00003597	0.00002264	0.00002255	0.00001608	0.00000618	0.00000248	0.00000735	0.00006082	0.00000093	0.00000431	0.00000202	0.00000691	0.00003631	0.00001020	0.00007668	0.00005132	0.00001153	0.00001144	0.00003840	0.00000259	0.00004574	0.00001787	0.00005634	0.00003396	0.00091081	0.00005014	0.00002969	0.00002131	0.00001878	0.00004512
44	NPL-KHU-044	Combretaceae	Quisqualis	indica	Flower	0.00005738	0.00006696	0.00006378	0.00004586	0.00007132	0.00005467	0.00004446	0.00004452	0.00006945	0.00003758	0.00003530	0.00003892	0.00007262	0.00005038	0.00005045	0.00004125	0.00006156	0.00005428	0.00002707	0.00004231	0.00005077	0.00004422	0.00002555	0.00002841	0.00002896	0.00002623	0.00002598	0.00002082	0.00002157	0.00001304	0.00002084	0.00001625	0.00000805	0.00001921	0.00000943	0.00002263	0.00000935	0.00001839	0.00001189	0.00130590	0.00011550	0.00000955	0.00000826	0.00000880
45	NPL-KHU-045	Apiaceae	Aegopodium	podagraria	Whole plant	0.00000455	0.00001213	0.00000500	0.00000316	0.00000517	0.00114014	0.00002028	0.00001572	0.00000921	0.00001207	0.00000967	0.00001664	0.00001381	0.00000747	0.00000673	0.00000760	0.00003152	0.00003827	0.00000312	0.00000793	0.00000244	0.00000695	0.00000993	0.00000178	0.00000522	0.00000662	0.00003951	0.00000848	0.00000227	0.00000811	0.00000432	0.00000802	0.00001662	0.00003299	0.00003003	0.00004700	0.00002299	0.00002475	0.00005557	0.00059615	0.00002573	0.00006014	0.00008227	0.00007313
46	NPL-KHU-046	Cornaceae	Cornus	officinalis	Fruit	0.00000178	0.00000174	0.00000052	0.00000209	0.00000087	0.00000150	0.00000315	0.00000197	0.00000290	0.00000261	0.00001437	0.00001043	0.00014325	0.00143756	0.00001093	0.00000165	0.00000923	0.00000796	0.00000134	0.00000033	0.00000057	0.00000039	0.00000228	0.00000150	0.00000201	0.00000163	0.00000169	0.00000160	0.00000022	0.00000120	0.00000012	0.00000103	0.00000227	0.00000110	0.00000195	0.00000060	0.00000092	0.00000127	0.00000137	0.00000284	0.00000763	0.00006132	0.00044854	0.00002309
47	NPL-KHU-047	Lythraceae	Punica	granatum	Fruit	0.00005989	0.00006443	0.00005391	0.00005348	0.00007436	0.00007351	0.00004857	0.00005817	0.00005789	0.00009492	0.00003917	0.00003925	0.00007611	0.00009222	0.00007208	0.00006503	0.00005576	0.00004538	0.00005074	0.00003293	0.00005397	0.00002849	0.00003282	0.00003843	0.00001640	0.00002035	0.00002726	0.00002286	0.00002721	0.00002144	0.00002214	0.00002172	0.00003099	0.00002921	0.00002551	0.00003074	0.00002947	0.00001211	0.00002568	0.00196882	0.00005127	0.00001581	0.00001836	0.00001352
48	NPL-KHU-048	Zingiberaceae	Elettaria	cardamomum	Seed	0.00001728	0.00001024	0.00001757	0.00009285	0.00001833	0.00001521	0.00001986	0.00003569	0.00004955	0.00002451	0.00002220	0.00001799	0.00002134	0.00001309	0.00002223	0.00002528	0.00003542	0.00002891	0.00004259	0.00002039	0.00001752	0.00002070	0.00001261	0.00001627	0.00001088	0.00001337	0.00001098	0.00001704	0.00000932	0.00000727	0.00000684	0.00001252	0.00000937	0.00000795	0.00000723	0.00000889	0.00000698	0.00001195	0.00105505	0.00002171	0.00001022	0.00004685	0.00001356	0.00001562
49	NPL-KHU-049	Apiaceae	Anethum	graveolens	Whole plant	0.00001139	0.00000897	0.00001682	0.00001996	0.00001173	0.00001659	0.00000747	0.00001862	0.00001067	0.00000971	0.00000988	0.00002022	0.00001206	0.00000928	0.00001031	0.00000952	0.00001794	0.00002330	0.00001006	0.00016288	0.00001793	0.00000975	0.00000876	0.00001354	0.00000253	0.00000471	0.00000923	0.00000363	0.00000506	0.00000238	0.00000182	0.00000090	0.00000291	0.00000155	0.00000601	0.00001268	0.00000560	0.00000527	0.00000061	0.00060036	0.00002099	0.00002737	0.00000581	0.00000641
50	NPL-KHU-050	Ebenaceae	Diospyros	kaki	Fruit	0.00004246	0.00005195	0.00004163	0.00005778	0.00004811	0.00006282	0.00004895	0.00006705	0.00008693	0.00007536	0.00006199	0.00004455	0.00007418	0.00005144	0.00004020	0.00003685	0.00003787	0.00004159	0.00003646	0.00003848	0.00002229	0.00019632	0.00010517	0.00001583	0.00001385	0.00001940	0.00004349	0.00000417	0.00021514	0.00027004	0.00000726	0.00001095	0.00003326	0.00000526	0.00004266	0.00002255	0.00002496	0.00003028	0.00195556	0.00004295	0.00000598	0.00003857	0.00000796	0.00001138
51	NPL-KHU-051	Apiaceae	Bupleurum	falcatum	Root	0.00000702	0.00000911	0.00000737	0.00000707	0.00000895	0.00000678	0.00000330	0.00002521	0.00000697	0.00000992	0.00000981	0.00000857	0.00001104	0.00000829	0.00000628	0.00001896	0.00003473	0.00002457	0.00001966	0.00001023	0.00000538	0.00000472	0.00000460	0.00000569	0.00000387	0.00000363	0.00002948	0.00000220	0.00000909	0.00000761	0.00000170	0.00000129	0.00000271	0.00000137	0.00000054	0.00000840	0.00000459	0.00000787	0.00047507	0.00014311	0.00000219	0.00001957	0.00000138	0.00000467
52	NPL-KHU-052	Polygonaceae	Rumex	japonicus	Whole plant	0.00001197	0.00001574	0.00001498	0.00001210	0.00001627	0.00001141	0.00000737	0.00001409	0.00001639	0.00001879	0.00001804	0.00001036	0.00001115	0.00001151	0.00001153	0.00001327	0.00000931	0.00001379	0.00000689	0.00000909	0.00000424	0.00001512	0.00001095	0.00000725	0.00000671	0.00001274	0.00001497	0.00000367	0.00001840	0.00001925	0.00000596	0.00000370	0.00000789	0.00000954	0.00000845	0.00000399	0.00000437	0.00000511	0.00035742	0.00000525	0.00000411	0.00000369	0.00000643	0.00000813
53	NPL-KHU-053	Primulaceae	Lysimachia	foenum-graecum	Whole plant	0.00000453	0.00000172	0.00000411	0.00000391	0.00000264	0.00001073	0.00000655	0.00001458	0.00001358	0.00000904	0.00000318	0.00000628	0.00000344	0.00010173	0.00025135	0.00002247	0.00002435	0.00005891	0.00000536	0.00000366	0.00000689	0.00000584	0.00000683	0.00000267	0.00000609	0.00000398	0.00001437	0.00000581	0.00001099	0.00001245	0.00001280	0.00004085	0.00009316	0.00001917	0.00013617	0.00003481	0.00008691	0.00010286	0.00064495	0.00009119	0.00014913	0.00006638	0.00002408	0.00005626
54	NPL-KHU-054	Lardizabalaceae	Akebia	quinata	Fruit, Stem	0.00000900	0.00000216	0.00000427	0.00000342	0.00000393	0.00000727	0.00000376	0.00000536	0.00000358	0.00000769	0.00000163	0.00000275	0.00000395	0.00000750	0.00001432	0.00002501	0.00001029	0.00000472	0.00000302	0.00000191	0.00000190	0.00001553	0.00000584	0.00000421	0.00000242	0.00000348	0.00000353	0.00000462	0.00001414	0.00001103	0.00000112	0.00000314	0.00000293	0.00000387	0.00000531	0.00000589	0.00000857	0.00000594	0.00002207	0.00037013	0.00000618	0.00000478	0.00000851	0.00000312
55	NPL-KHU-055	Crassulaceae	Orostachys	japonica	Whole plant	0.00004203	0.00003576	0.00005146	0.00005328	0.00006711	0.00003423	0.00003819	0.00006635	0.00003919	0.00004723	0.00002553	0.00003852	0.00003671	0.00007170	0.00005209	0.00004019	0.00004777	0.00002732	0.00003224	0.00002349	0.00003053	0.00005231	0.00001529	0.00003440	0.00001144	0.00000905	0.00002132	0.00002594	0.00003859	0.00005470	0.00000561	0.00000345	0.00001048	0.00000555	0.00000417	0.00000963	0.00000528	0.00000260	0.00020318	0.00160424	0.00000398	0.00000844	0.00001327	0.00001240
56	NPL-KHU-056	Caryophyllaceae	Silene	firma	Whole plant	0.00001018	0.00001819	0.00000989	0.00001384	0.00001237	0.00001770	0.00004056	0.00003981	0.00001421	0.00000964	0.00001722	0.00004906	0.00003394	0.00026812	0.00130660	0.00019939	0.00002004	0.00009271	0.00004593	0.00002122	0.00000567	0.00009225	0.00000519	0.00000989	0.00001807	0.00005904	0.00006528	0.00006448	0.00012706	0.00006542	0.00001192	0.00001341	0.00001587	0.00000131	0.00001669	0.00003615	0.00001635	0.00001158	0.00086049	0.00000944	0.00001579	0.00010698	0.00004876	0.00003061
57	NPL-KHU-057	Solanaceae	Solanum	nigrum	Whole plant	0.00001083	0.00001278	0.00000648	0.00000746	0.00000626	0.00001296	0.00000773	0.00001526	0.00002060	0.00000807	0.00000650	0.00000608	0.00001091	0.00000792	0.00000741	0.00001454	0.00003377	0.00001951	0.00002296	0.00000584	0.00000161	0.00027450	0.00000889	0.00000228	0.00000353	0.00000193	0.00001941	0.00000366	0.00028519	0.00029235	0.00000665	0.00001457	0.00005094	0.00000396	0.00006432	0.00002415	0.00002876	0.00006731	0.00111407	0.00018022	0.00004775	0.00004752	0.00001853	0.00004558
58	NPL-KHU-058	Asteraceae	Arctium	lappa	Root	0.00000049	0.00000055	0.00000042	0.00000050	0.00000009	0.00000131	0.00000200	0.00000177	0.00000198	0.00000316	0.00000362	0.00000846	0.00009913	0.00047252	0.00001195	0.00001860	0.00004438	0.00003150	0.00000733	0.00000410	0.00000188	0.00008337	0.00000150	0.00000170	0.00000191	0.00000377	0.00001158	0.00000758	0.00009082	0.00009304	0.00001080	0.00000941	0.00002582	0.00001274	0.00002384	0.00003452	0.00005006	0.00006123	0.00039025	0.00021923	0.00010775	0.00007388	0.00003881	0.00005563
59	NPL-KHU-059	Brassicaceae	Brassica	napus	Seed	0.00001049	0.00001490	0.00001581	0.00001020	0.00001774	0.00001924	0.00001270	0.00001432	0.00001625	0.00001316	0.00002221	0.00001120	0.00000949	0.00000957	0.00001460	0.00001423	0.00001339	0.00000478	0.00001669	0.00000876	0.00001033	0.00000984	0.00003524	0.00002020	0.00001095	0.00001726	0.00003319	0.00000906	0.00001480	0.00001537	0.00003088	0.00001952	0.00000665	0.00000628	0.00000986	0.00001668	0.00000688	0.00000470	0.00047192	0.00002498	0.00000561	0.00004584	0.00000441	0.00002783
60	NPL-KHU-060	Asteraceae	Artemisia	anomala	Leaf	0.00003163	0.00003327	0.00003634	0.00005580	0.00003712	0.00003937	0.00005063	0.00007846	0.00008081	0.00002292	0.00003690	0.00004607	0.00004689	0.00002111	0.00001103	0.00002328	0.00000935	0.00001087	0.00002529	0.00001103	0.00000245	0.00001587	0.00001408	0.00001238	0.00000969	0.00001629	0.00003119	0.00003329	0.00002752	0.00001772	0.00002273	0.00001549	0.00000557	0.00000461	0.00000958	0.00000108	0.00000389	0.00000159	0.00098079	0.00006542	0.00000375	0.00000384	0.00004334	0.00006718
61	NPL-KHU-061	Ulmaceae	Ulmus	macrocarpa	Rind	0.00005392	0.00003812	0.00006756	0.00006360	0.00004215	0.00003774	0.00005146	0.00005688	0.00006349	0.00004260	0.00003900	0.00003337	0.00002323	0.00006603	0.00004653	0.00004583	0.00004018	0.00002846	0.00002376	0.00002870	0.00002628	0.00004267	0.00002828	0.00003396	0.00002781	0.00002186	0.00004699	0.00002053	0.00002649	0.00002162	0.00001255	0.00001804	0.00003229	0.00001545	0.00001477	0.00001829	0.00001358	0.00000872	0.00083468	0.00063058	0.00002930	0.00006664	0.00001827	0.00002502
62	NPL-KHU-062	Burseraceae	Boswellia	carteri	Resin	0.00004433	0.00003598	0.00002803	0.00006850	0.00002798	0.00002073	0.00002710	0.00002665	0.00003765	0.00001398	0.00000826	0.00002028	0.00007484	0.00009295	0.00007351	0.00013000	0.00020693	0.00016393	0.00010679	0.00000538	0.00000402	0.00000260	0.00000351	0.00000053	0.00000179	0.00000227	0.00000021	0.00000085	0.00000077	0.00000026	0.00000070	0.00000074	0.00000281	0.00002680	0.00000260	0.00001600	0.00000000	0.00000040	0.00000009	0.00386707	0.00013441	0.00002260	0.00003072	0.00012010
63	NPL-KHU-063	Lauraceae	Cinnamomum	cassia	Rind	0.00001570	0.00007696	0.00001104	0.00000979	0.00004085	0.00000408	0.00015846	0.00007127	0.00001873	0.00010567	0.03070367	0.00039939	0.00019309	0.00020669	0.00016618	0.00006736	0.00004397	0.00003867	0.00003784	0.00003179	0.00003388	0.00001791	0.00002312	0.00002768	0.00001894	0.00001644	0.00001446	0.00000827	0.00000824	0.00001227	0.00001742	0.00000439	0.00000985	0.00001223	0.00000739	0.00000402	0.00000472	0.00001043	0.00043761	0.00000554	0.00000213	0.00000102	0.00000282	0.00000352
64	NPL-KHU-064	Orobanchaceae	Cistanche	deserticola	Whole plant	0.00000141	0.00000145	0.00000127	0.00000098	0.00000075	0.00000148	0.00000189	0.00000176	0.00000344	0.00000135	0.00000328	0.00000068	0.00000173	0.00000217	0.00000142	0.00000857	0.00000497	0.00001239	0.00000272	0.00000081	0.00000189	0.00002364	0.00000149	0.00000199	0.00000343	0.00000392	0.00000838	0.00000430	0.00003486	0.00001875	0.00000570	0.00001131	0.00001345	0.00000482	0.00001361	0.00000897	0.00001387	0.00000759	0.00085975	0.00002844	0.00000782	0.00005578	0.00000397	0.00000442
65	NPL-KHU-065	Asteraceae	Artemisia	capillaris	Leaf	0.00002196	0.00004359	0.00003822	0.00001807	0.00001826	0.00002037	0.00003222	0.00024511	0.00004208	0.00005427	0.00004471	0.00006784	0.00015867	0.00003346	0.00003347	0.00002963	0.00009832	0.00008333	0.00002887	0.00001341	0.00002370	0.00003483	0.00004060	0.00000833	0.00000816	0.00000210	0.00002501	0.00001346	0.00002972	0.00001142	0.00000861	0.00003715	0.00009510	0.00001258	0.00003591	0.00002595	0.00008253	0.00004091	0.00086094	0.00003846	0.00003113	0.00002859	0.00003067	0.00002390
66	NPL-KHU-066	Apiaceae	Angelica	acutiloba	Root	0.00000140	0.00000104	0.00000044	0.00000037	0.00000056	0.00000126	0.00000038	0.00000110	0.00000045	0.00000117	0.00000065	0.00000081	0.00000028	0.00000011	0.00000097	0.00000274	0.00001726	0.00001631	0.00000174	0.00000023	0.00000023	0.00000148	0.00000070	0.00000027	0.00000061	0.00000088	0.00000749	0.00000082	0.00000221	0.00000247	0.00000107	0.00000122	0.00001710	0.00000034	0.00001792	0.00000535	0.00001504	0.00001430	0.00034968	0.00000775	0.00001888	0.00004994	0.00000691	0.00001123
67	NPL-KHU-067	Fabaceae	Pterocarpus	santalinus	Wood	0.00002752	0.00007414	0.00007894	0.00005139	0.00005544	0.00012767	0.00006246	0.00030034	0.00018564	0.00011121	0.00007765	0.00002001	0.00008869	0.00004757	0.00005203	0.00001740	0.00017723	0.00004001	0.00010592	0.00011551	0.00001173	0.00000457	0.00001351	0.00001131	0.00000086	0.00000619	0.00000595	0.00000857	0.00000407	0.00000755	0.00000814	0.00000398	0.00000821	0.00000344	0.00000547	0.00000511	0.00000149	0.00000633	0.00138872	0.00000055	0.00000253	0.00000184	0.00000205	0.00000072
68	NPL-KHU-068	Lamiaceae	Perilla	frutescens	Leaf	0.00002494	0.00004857	0.00006494	0.00003588	0.00006089	0.00003939	0.00008907	0.00007065	0.00004709	0.00006211	0.00005217	0.00005513	0.00004100	0.00004428	0.00004459	0.00004164	0.00016458	0.00003983	0.00004484	0.00004153	0.00004182	0.00003184	0.00017184	0.00004458	0.00015004	0.00004483	0.00005662	0.00002073	0.00002190	0.00002972	0.00002363	0.00001668	0.00002637	0.00001457	0.00001540	0.00005325	0.00001420	0.00003575	0.00273120	0.00003512	0.00005362	0.00007741	0.00005483	0.00005357
69	NPL-KHU-069	Lauraceae	Cinnamomum	camphora	Leaf, Rind	0.00000179	0.00000292	0.00000310	0.00000214	0.00000199	0.00000168	0.00000291	0.00000201	0.00000257	0.00000300	0.00000237	0.00000266	0.00000353	0.00000363	0.00000231	0.00000288	0.00000316	0.00000261	0.00000323	0.00000323	0.00000374	0.00000254	0.00000312	0.00000341	0.00000393	0.00000424	0.00000392	0.00000427	0.00000308	0.00000469	0.00000401	0.00000371	0.00000331	0.00000342	0.00000514	0.00000534	0.00000458	0.00000524	0.00003522	0.00000500	0.00000472	0.00000396	0.00000422	0.00000447
70	NPL-KHU-070	Polyporaceae	Polyporus	umbellatus	Mushroom	0.00018319	0.00023479	0.00016976	0.00021964	0.00016678	0.00011922	0.00018322	0.00042364	0.00043932	0.00020648	0.00022889	0.00024675	0.00036709	0.00022490	0.00024249	0.00025854	0.00017390	0.00017981	0.00014811	0.00021493	0.00017139	0.00012756	0.00017947	0.00027579	0.00021607	0.00023555	0.00062352	0.00017819	0.00021347	0.00022606	0.00010829	0.00017885	0.00024034	0.00014853	0.00017374	0.00060278	0.00027276	0.00018724	0.00533823	0.00017652	0.00018969	0.00024202	0.00008505	0.00065940
71	NPL-KHU-071	Urticaceae	Boehmeria	nivea	Stem	0.00007833	0.00008103	0.00007965	0.00003914	0.00005056	0.00004579	0.00007549	0.00002506	0.00012115	0.00002831	0.00004019	0.00005097	0.00003268	0.00003520	0.00001920	0.00002898	0.00003248	0.00003806	0.00003282	0.00003846	0.00004943	0.00002947	0.00001393	0.00002621	0.00005848	0.00004061	0.00005765	0.00005845	0.00002824	0.00003185	0.00003887	0.00003132	0.00005835	0.00002865	0.00007873	0.00002589	0.00006232	0.00006057	0.00269723	0.00010391	0.00001615	0.00002758	0.00001824	0.00002323
72	NPL-KHU-072	Adoxaceae	Sambucus	williamsii	Fruit	0.00003149	0.00002161	0.00001975	0.00001961	0.00003294	0.00002510	0.00002784	0.00004275	0.00004546	0.00002273	0.00003052	0.00004136	0.00005267	0.00002310	0.00003819	0.00002779	0.00007806	0.00004018	0.00001983	0.00002113	0.00001751	0.00001649	0.00004478	0.00002102	0.00005834	0.00002986	0.00003512	0.00002446	0.00001604	0.00000793	0.00001678	0.00001446	0.00003057	0.00001712	0.00002778	0.00002374	0.00003210	0.00001123	0.00183001	0.00003099	0.00001076	0.00004037	0.00002364	0.00004025
73	NPL-KHU-073	Tamaricaceae	Tamarix	chinensis	Whole plant	0.00002693	0.00002960	0.00002575	0.00002259	0.00002110	0.00003927	0.00003033	0.00003855	0.00001747	0.00002078	0.00003075	0.00003999	0.00003032	0.00002850	0.00002172	0.00003146	0.00003020	0.00003084	0.00002608	0.00001692	0.00002073	0.00014689	0.00008443	0.00001217	0.00000684	0.00001338	0.00003426	0.00001182	0.00017924	0.00024028	0.00001738	0.00002059	0.00004413	0.00001991	0.00003423	0.00006672	0.00004679	0.00005347	0.00009025	0.00154208	0.00002143	0.00002252	0.00004239	0.00008185
74	NPL-KHU-074	Myrtaceae	Syzygium	aromaticum	Flower bud	0.00001918	0.00001510	0.00001752	0.00001563	0.00000988	0.00001347	0.00001338	0.00015871	0.00001134	0.00000881	0.00002448	0.00000956	0.00007430	0.00011833	0.00000576	0.00001732	0.00002430	0.00001497	0.00000916	0.00000375	0.00000846	0.00001381	0.00003381	0.00000689	0.00000582	0.00000669	0.00000782	0.00000246	0.00002450	0.00004095	0.00000120	0.00000082	0.00000295	0.00000185	0.00000271	0.00000659	0.00000340	0.00000346	0.00000468	0.00077141	0.00001971	0.00000048	0.00000092	0.00000322
75	NPL-KHU-075	Campanulaceae	Adenophora	remotiflora	Root	0.00000567	0.00000446	0.00000397	0.00000359	0.00000552	0.00000249	0.00000405	0.00000602	0.00000280	0.00000343	0.00000348	0.00000369	0.00000398	0.00000259	0.00000591	0.00000375	0.00000438	0.00000704	0.00000385	0.00000559	0.00000155	0.00000266	0.00000246	0.00000251	0.00000200	0.00000202	0.00000638	0.00000228	0.00000269	0.00000261	0.00000198	0.00000181	0.00000225	0.00000069	0.00000222	0.00000236	0.00000373	0.00000860	0.00030188	0.00000214	0.00000095	0.00000437	0.00000106	0.00000574
76	NPL-KHU-076	Rhamnaceae	Hovenia	dulcis	Fruit	0.00001192	0.00001137	0.00000852	0.00000831	0.00000794	0.00001184	0.00002052	0.00001607	0.00001260	0.00000745	0.00001201	0.00001314	0.00000954	0.00000871	0.00000945	0.00000969	0.00001055	0.00000775	0.00000921	0.00000379	0.00000650	0.00001456	0.00000555	0.00000627	0.00000575	0.00000411	0.00000956	0.00000604	0.00001019	0.00001480	0.00000199	0.00000288	0.00000325	0.00000350	0.00000273	0.00000322	0.00000230	0.00000536	0.00046079	0.00002706	0.00000057	0.00000249	0.00000130	0.00000509
77	NPL-KHU-077	Amaranthaceae	Kochia	scoparia	Whole plant	0.00000959	0.00000683	0.00001401	0.00000407	0.00000714	0.00000577	0.00001236	0.00001094	0.00000529	0.00000645	0.00000766	0.00001503	0.00000520	0.00000697	0.00000458	0.00000804	0.00002195	0.00001427	0.00000968	0.00000740	0.00000658	0.00005621	0.00000309	0.00000711	0.00000623	0.00000712	0.00000795	0.00000899	0.00006622	0.00003326	0.00000812	0.00000877	0.00000421	0.00000157	0.00000933	0.00001361	0.00001083	0.00002269	0.00043883	0.00001818	0.00003233	0.00001219	0.00003352	0.00003003
78	NPL-KHU-078	Rutaceae	Poncirus	trifoliata	Fruit	0.00000759	0.00000637	0.00000373	0.00001026	0.00000771	0.00001021	0.00000799	0.00000878	0.00000559	0.00000670	0.00000642	0.00000798	0.00000589	0.00000499	0.00000755	0.00001680	0.00002793	0.00002692	0.00001249	0.00000279	0.00000128	0.00002254	0.00000120	0.00000001	0.00000021	0.00000020	0.00000061	0.00000024	0.00001199	0.00001355	0.00000003	0.00000001	0.00000000	0.00000000	0.00000014	0.00000013	0.00000000	0.00000008	0.00053887	0.00014566	0.00001663	0.00002013	0.00015936	0.00002018
79	NPL-KHU-079	Plantaginaceae	Plantago	asiatica	Seed, Leaf	0.00001676	0.00001893	0.00003102	0.00001899	0.00002019	0.00000989	0.00004974	0.00003125	0.00005694	0.00001980	0.00003035	0.00002522	0.00001383	0.00001260	0.00002421	0.00002447	0.00001570	0.00003258	0.00003194	0.00001139	0.00001155	0.00003129	0.00001659	0.00001438	0.00001148	0.00001037	0.00001564	0.00002611	0.00001974	0.00003310	0.00000857	0.00001512	0.00001108	0.00001331	0.00001976	0.00003028	0.00001146	0.00001585	0.00216283	0.00004123	0.00001336	0.00004896	0.00001776	0.00001584
80	NPL-KHU-080	Apiaceae	Cnidium	officinale	Root	0.00000656	0.00000482	0.00000582	0.00000497	0.00000642	0.00000747	0.00000414	0.00002960	0.00000460	0.00000576	0.00000379	0.00000430	0.00000413	0.00001007	0.00000575	0.00000728	0.00002147	0.00000649	0.00000375	0.00000423	0.00000317	0.00000310	0.00001437	0.00000401	0.00001157	0.00000522	0.00000937	0.00000213	0.00000296	0.00000182	0.00000170	0.00000155	0.00000214	0.00000091	0.00000069	0.00000670	0.00001099	0.00000246	0.00021559	0.00000295	0.00000204	0.00004393	0.00000724	0.00000749
81	NPL-KHU-081	Apiaceae	Ligusticum	chuanxiong	Root	0.00000433	0.00000707	0.00000545	0.00000387	0.00000644	0.00000456	0.00000447	0.00004640	0.00000863	0.00000360	0.00000390	0.00000399	0.00000369	0.00000248	0.00000762	0.00000426	0.00003071	0.00000851	0.00000605	0.00000438	0.00000354	0.00000429	0.00002159	0.00000332	0.00002212	0.00000262	0.00001314	0.00000510	0.00000700	0.00000502	0.00000229	0.00000266	0.00000451	0.00000574	0.00000417	0.00001003	0.00000959	0.00000852	0.00034222	0.00000259	0.00000392	0.00004536	0.00000660	0.00001190
82	NPL-KHU-082	Amaranthaceae	Celosia	argentea	Whole plant	0.00007638	0.00005578	0.00010026	0.00005357	0.00007182	0.00002923	0.00009054	0.00007142	0.00006955	0.00005844	0.00007647	0.00005447	0.00007029	0.00010039	0.00013354	0.00007656	0.00017889	0.00010491	0.00004144	0.00005771	0.00006756	0.00091782	0.00006343	0.00003236	0.00006862	0.00007250	0.00007423	0.00005388	0.00126198	0.00055456	0.00002847	0.00002592	0.00003353	0.00005537	0.00006554	0.00005308	0.00004350	0.00008204	0.00126873	0.00004614	0.00006929	0.00007385	0.00007549	0.00005295
83	NPL-KHU-083	Malvaceae	Alcea	rosea	Flower	0.00001518	0.00000459	0.00000999	0.00000976	0.00000948	0.00001177	0.00001231	0.00000948	0.00001325	0.00001082	0.00001154	0.00000621	0.00000751	0.00001279	0.00000551	0.00001331	0.00002851	0.00003393	0.00002278	0.00000565	0.00000734	0.00008001	0.00000948	0.00000691	0.00000264	0.00000370	0.00002080	0.00000562	0.00008433	0.00009057	0.00000255	0.00000329	0.00001826	0.00000253	0.00000223	0.00000654	0.00001023	0.00001878	0.00003325	0.00068671	0.00000554	0.00003097	0.00001462	0.00011545
84	NPL-KHU-084	Amaryllidaceae	Allium	fistulosum	Whole plant	0.00000211	0.00000149	0.00000128	0.00000213	0.00000212	0.00000272	0.00000318	0.00000300	0.00000288	0.00000215	0.00000116	0.00000389	0.00000146	0.00000156	0.00000269	0.00000656	0.00000666	0.00001510	0.00000158	0.00000089	0.00000141	0.00000326	0.00000047	0.00000065	0.00000071	0.00000240	0.00000883	0.00000169	0.00000314	0.00000135	0.00000086	0.00000047	0.00000365	0.00000080	0.00000477	0.00000318	0.00000969	0.00000570	0.00027132	0.00000410	0.00000693	0.00018385	0.00000328	0.00000797
85	NPL-KHU-085	Lamiaceae	Leonurus	japonicus	Whole plant	0.00002575	0.00002057	0.00001787	0.00003119	0.00002333	0.00002701	0.00002058	0.00002792	0.00004799	0.00002541	0.00002649	0.00003881	0.00002814	0.00003116	0.00002950	0.00003388	0.00001685	0.00002643	0.00002066	0.00003509	0.00002374	0.00044693	0.00002380	0.00003166	0.00003576	0.00004301	0.00005704	0.00006151	0.00054614	0.00034718	0.00003396	0.00004535	0.00005645	0.00005050	0.00004167	0.00002486	0.00004113	0.00007093	0.00057626	0.00003732	0.00004880	0.00004525	0.00004477	0.00011920
86	NPL-KHU-086	Cupressaceae	Platycladus	orientalis	Rind	0.00002173	0.00002199	0.00002845	0.00001895	0.00002232	0.00001811	0.00001675	0.00005234	0.00001878	0.00001822	0.00001256	0.00001497	0.00002428	0.00002830	0.00001751	0.00002744	0.00001763	0.00005483	0.00002078	0.00001393	0.00000678	0.00000676	0.00000523	0.00001125	0.00000161	0.00000633	0.00000793	0.00000830	0.00000406	0.00000129	0.00000427	0.00000351	0.00000455	0.00000081	0.00000225	0.00000096	0.00000341	0.00000242	0.00061161	0.00003661	0.00000036	0.00001075	0.00000371	0.00000456
87	NPL-KHU-087	Rubiaceae	Gardenia	jasminoides	Fruit	0.00000422	0.00000556	0.00000543	0.00001262	0.00000850	0.00000667	0.00000962	0.00001677	0.00007977	0.00001226	0.00000969	0.00001136	0.00001176	0.00001917	0.00000549	0.00001513	0.00001330	0.00001741	0.00000713	0.00000545	0.00001204	0.00003587	0.00001089	0.00000841	0.00000366	0.00000959	0.00000893	0.00000498	0.00000642	0.00000670	0.00001067	0.00001748	0.00001455	0.00000559	0.00000623	0.00000934	0.00000598	0.00000679	0.00037970	0.00001875	0.00000751	0.00000868	0.00000308	0.00000536
88	NPL-KHU-088	Thymelaeaceae	Aquilaria	agallocha	Resin	0.00001409	0.00001261	0.00001737	0.00001504	0.00001184	0.00001843	0.00001176	0.00004204	0.00002290	0.00002325	0.00002183	0.00002516	0.00003081	0.00004320	0.00002179	0.00002072	0.00002419	0.00001798	0.00001606	0.00001068	0.00001453	0.00000510	0.00000358	0.00000412	0.00000448	0.00000237	0.00000563	0.00000183	0.00000105	0.00000149	0.00000075	0.00000068	0.00000017	0.00000058	0.00000001	0.00000037	0.00000014	0.00000014	0.00010717	0.00000014	0.00000001	0.00000000	0.00000000	0.00000000
89	NPL-KHU-089	Apiaceae	Carum	carvi	Seed	0.00001189	0.00001291	0.00001160	0.00001174	0.00001316	0.00000543	0.00000621	0.00001465	0.00000810	0.00001188	0.00000722	0.00000973	0.00000733	0.00000974	0.00001010	0.00001516	0.00004495	0.00002193	0.00001138	0.00000812	0.00000170	0.00000206	0.00001720	0.00000234	0.00001688	0.00000517	0.00002561	0.00000735	0.00000818	0.00000181	0.00000172	0.00000753	0.00000438	0.00000884	0.00002140	0.00002412	0.00001527	0.00001278	0.00050374	0.00000478	0.00000498	0.00004823	0.00000472	0.00002530
90	NPL-KHU-090	Apiaceae	Cuminum	cyminum	Seed	0.00000110	0.00001123	0.00243454	0.00585045	0.00013948	0.00013993	0.00009816	0.00004810	0.00004502	0.00006216	0.00003117	0.00002331	0.00002284	0.00003685	0.00010268	0.00071854	0.00089442	0.00013879	0.00003981	0.00002552	0.00002089	0.00002137	0.00001140	0.00000763	0.00000720	0.00000991	0.00004119	0.00001211	0.00000614	0.00000424	0.00000472	0.00000394	0.00000459	0.00001549	0.00000753	0.00000424	0.00000058	0.00000506	0.00068113	0.00000737	0.00000146	0.00001189	0.00000074	0.00000875
91	NPL-KHU-091	Schisandraceae	Illicium	verum	Seed	0.00000737	0.00000972	0.00000680	0.00000474	0.00002379	0.00065243	0.00000966	0.00001295	0.00002343	0.00001089	0.00002346	0.00001676	0.00001419	0.00001153	0.00000857	0.00001537	0.00003119	0.00003419	0.00001568	0.00001334	0.00000638	0.00000936	0.00001917	0.00000400	0.00001305	0.00000291	0.00004814	0.00001100	0.00000777	0.00000701	0.00000485	0.00000466	0.00001040	0.00002983	0.00001484	0.00002225	0.00002676	0.00001735	0.00056210	0.00001739	0.00001112	0.00005949	0.00001030	0.00005701
92	NPL-KHU-092	Euphorbiaceae	Ricinus	communis	Seed	0.00000549	0.00001416	0.00001370	0.00000846	0.00000725	0.00001528	0.00001921	0.00001026	0.00001420	0.00001393	0.00000921	0.00000936	0.00001461	0.00001423	0.00003135	0.00002121	0.00001396	0.00001192	0.00001505	0.00001918	0.00001329	0.00079481	0.00006528	0.00000883	0.00000918	0.00000940	0.00002919	0.00001486	0.00079980	0.00083985	0.00000574	0.00000488	0.00003535	0.00001143	0.00000702	0.00000651	0.00004890	0.00002673	0.00098463	0.00003769	0.00000819	0.00003821	0.00030048	0.00047846
93	NPL-KHU-093	Nelumbonaceae	Nelumbo	nucifera	Flower, Seed, Root	0.00001329	0.00001082	0.00000577	0.00001028	0.00001055	0.00001185	0.00000878	0.00001165	0.00001234	0.00000715	0.00001621	0.00001517	0.00001388	0.00000812	0.00000769	0.00001360	0.00001866	0.00001840	0.00000979	0.00001517	0.00001163	0.00005226	0.00001301	0.00001129	0.00001793	0.00002000	0.00001746	0.00001229	0.00005548	0.00003970	0.00001824	0.00002719	0.00003791	0.00003439	0.00004865	0.00003862	0.00003269	0.00003345	0.00081564	0.00006972	0.00002777	0.00003423	0.00002083	0.00003641
94	NPL-KHU-094	Asteraceae	Carpesium	abrotanoides	Whole plant	0.00000842	0.00000870	0.00000732	0.00000310	0.00001183	0.00000362	0.00000936	0.00001086	0.00003045	0.00000641	0.00000627	0.00000988	0.00000812	0.00000540	0.00001292	0.00000850	0.00000997	0.00000838	0.00000869	0.00000427	0.00000900	0.00019070	0.00000571	0.00000618	0.00000450	0.00000971	0.00001012	0.00000774	0.00021265	0.00013595	0.00000404	0.00000911	0.00001549	0.00000252	0.00001498	0.00000683	0.00001367	0.00001253	0.00145439	0.00001147	0.00000586	0.00002680	0.00000756	0.00000897
95	NPL-KHU-095	Asteraceae	Eclipta	prostrata	Whole plant	0.00001134	0.00000790	0.00001073	0.00001059	0.00001399	0.00001249	0.00001753	0.00002025	0.00001316	0.00001056	0.00001683	0.00002154	0.00001919	0.00001243	0.00000983	0.00001920	0.00005472	0.00002905	0.00000660	0.00000577	0.00000378	0.00000340	0.00003053	0.00000304	0.00001520	0.00000793	0.00003051	0.00000759	0.00000575	0.00000273	0.00000450	0.00000898	0.00004921	0.00000116	0.00005574	0.00001596	0.00006233	0.00002392	0.00179661	0.00004091	0.00001137	0.00011713	0.00002567	0.00002425
96	NPL-KHU-096	Lamiaceae	Phlomis	umbrosa	Whole plant	0.00000775	0.00000734	0.00001228	0.00001326	0.00000661	0.00000689	0.00000964	0.00001445	0.00000976	0.00001450	0.00000750	0.00000972	0.00000908	0.00001072	0.00001049	0.00000616	0.00000774	0.00000589	0.00000486	0.00000851	0.00001028	0.00001051	0.00000862	0.00000734	0.00000634	0.00000531	0.00000808	0.00000629	0.00000417	0.00000282	0.00000533	0.00000496	0.00000506	0.00000508	0.00000373	0.00000212	0.00002198	0.00000498	0.00020306	0.00000299	0.00000227	0.00000744	0.00000425	0.00000274
97	NPL-KHU-097	Asteraceae	Artemisia	gmelinii	Leaf	0.00001900	0.00001678	0.00002058	0.00001786	0.00001948	0.00001851	0.00003206	0.00003951	0.00003535	0.00001726	0.00002343	0.00003287	0.00004372	0.00002398	0.00002335	0.00002260	0.00005065	0.00002284	0.00002777	0.00000951	0.00000755	0.00006418	0.00001149	0.00000719	0.00000700	0.00000529	0.00001446	0.00000574	0.00005530	0.00003948	0.00000823	0.00000580	0.00000864	0.00000881	0.00000482	0.00000387	0.00000201	0.00000538	0.00072905	0.00001598	0.00000765	0.00000226	0.00000404	0.00000395
98	NPL-KHU-098	Lygodiaceae	Lygodium	japonicum	Whole plant	0.00011186	0.00008475	0.00005188	0.00006353	0.00015141	0.00007136	0.00010989	0.00013204	0.00023947	0.00009733	0.00006630	0.00008401	0.00012568	0.00010572	0.00008372	0.00009954	0.00010871	0.00006716	0.00007274	0.00011491	0.00014085	0.00006068	0.00007857	0.00010399	0.00012206	0.00011805	0.00011877	0.00006619	0.00005821	0.00007568	0.00004954	0.00006874	0.00011581	0.00007522	0.00007664	0.00006960	0.00007219	0.00009625	0.00065912	0.00008830	0.00005458	0.00006551	0.00004271	0.00010627
99	NPL-KHU-099	Apiaceae	Glehnia	littoralis	Root	0.00000563	0.00000420	0.00000375	0.00000565	0.00000449	0.00000566	0.00000565	0.00000860	0.00000439	0.00000324	0.00000340	0.00000272	0.00000255	0.00000499	0.00000543	0.00001126	0.00004292	0.00003493	0.00000800	0.00000466	0.00000252	0.00000257	0.00001768	0.00000392	0.00002331	0.00000201	0.00001314	0.00000377	0.00000031	0.00000088	0.00000061	0.00000212	0.00000821	0.00000150	0.00000523	0.00000822	0.00001010	0.00000573	0.00036585	0.00000149	0.00000447	0.00005344	0.00000719	0.00001927
100	NPL-KHU-100	Pinaceae	Pinus	koraiensis	Seed	0.00003310	0.00002828	0.00004071	0.00004190	0.00004113	0.00003743	0.00003819	0.00003475	0.00004536	0.00004638	0.00003362	0.00005167	0.00003049	0.00004181	0.00003571	0.00004187	0.00004215	0.00004142	0.00005266	0.00002832	0.00004708	0.00005155	0.00003792	0.00003039	0.00003573	0.00004171	0.00010741	0.00003758	0.00005611	0.00004430	0.00004410	0.00003357	0.00003758	0.00003363	0.00003476	0.00008142	0.00006365	0.00003498	0.00038016	0.00005209	0.00003675	0.00003345	0.00004692	0.00006288
101	NPL-KHU-101	Lamiaceae	Elsholtzia	ciliata	Whole plant	0.00002137	0.00001944	0.00001257	0.00002508	0.00002052	0.00002484	0.00003151	0.00023898	0.00006156	0.00006703	0.00006131	0.00003116	0.00009079	0.00002911	0.00001784	0.00003072	0.00010698	0.00004051	0.00001324	0.00000536	0.00000344	0.00000369	0.00003635	0.00000104	0.00001287	0.00000810	0.00001802	0.00000472	0.00000148	0.00000266	0.00000151	0.00000329	0.00000580	0.00000358	0.00000926	0.00000931	0.00000575	0.00000709	0.00438832	0.00025590	0.00001093	0.00005184	0.00000683	0.00002078
102	NPL-KHU-102	Geraniaceae	Geranium	thunbergii	Root	0.00001154	0.00001042	0.00000847	0.00001185	0.00001471	0.00002667	0.00000726	0.00002554	0.00002224	0.00002757	0.00002768	0.00002424	0.00001999	0.00002671	0.00002621	0.00002654	0.00008053	0.00004367	0.00003230	0.00001229	0.00002594	0.00004971	0.00000769	0.00000879	0.00001226	0.00000542	0.00001978	0.00000581	0.00003877	0.00003927	0.00000796	0.00000836	0.00002423	0.00001928	0.00002784	0.00002531	0.00003406	0.00003614	0.00105960	0.00024004	0.00001532	0.00004102	0.00004133	0.00007155
103	NPL-KHU-103	Lamiaceae	Nepeta	tenuifolia	Whole plant	0.00001749	0.00002646	0.00001559	0.00001716	0.00002310	0.00005067	0.00002244	0.00005583	0.00010848	0.00002066	0.00002839	0.00002575	0.00004450	0.00003225	0.00001825	0.00003033	0.00006461	0.00003605	0.00002345	0.00001137	0.00002095	0.00000937	0.00001685	0.00001172	0.00001777	0.00001195	0.00001370	0.00000962	0.00000911	0.00000409	0.00000884	0.00000233	0.00001114	0.00001325	0.00001089	0.00001520	0.00001943	0.00001367	0.00040074	0.00026081	0.00002128	0.00001810	0.00001482	0.00003257
104	NPL-KHU-104	Juglandaceae	Juglans	regia	Seed, Rind	0.00008450	0.00008033	0.00010167	0.00010742	0.00010023	0.00005960	0.00007808	0.00007120	0.00010685	0.00006175	0.00007529	0.00006597	0.00008263	0.00006174	0.00004483	0.00005777	0.00012298	0.00006778	0.00008340	0.00005293	0.00007029	0.00028802	0.00003135	0.00007028	0.00011207	0.00007250	0.00006999	0.00004474	0.00029100	0.00017582	0.00006477	0.00008399	0.00005517	0.00004870	0.00005488	0.00007344	0.00008195	0.00009665	0.00274664	0.00002291	0.00004090	0.00009100	0.00004318	0.00003953
105	NPL-KHU-105	Asteraceae	Carthamus	tinctorius	Flower	0.00003369	0.00002931	0.00002603	0.00002201	0.00002848	0.00002543	0.00003290	0.00004341	0.00001945	0.00002721	0.00001557	0.00004723	0.00002639	0.00003170	0.00001769	0.00001928	0.00002654	0.00002137	0.00002237	0.00001932	0.00002097	0.00010030	0.00001078	0.00002746	0.00002061	0.00000880	0.00001188	0.00000776	0.00011743	0.00006275	0.00000717	0.00001158	0.00000576	0.00001333	0.00001830	0.00000887	0.00001027	0.00001204	0.00235044	0.00001195	0.00000548	0.00002628	0.00001367	0.00001449
106	NPL-KHU-106	Lamiaceae	Scutellaria	baicalensis	Root	0.00000282	0.00000499	0.00000390	0.00000495	0.00000407	0.00000347	0.00000329	0.00000349	0.00000453	0.00000502	0.00000308	0.00000290	0.00000623	0.00001731	0.00000733	0.00002228	0.00000959	0.00001093	0.00000477	0.00000350	0.00000633	0.00001310	0.00000220	0.00000488	0.00000255	0.00000313	0.00000527	0.00000365	0.00001217	0.00000845	0.00000336	0.00000519	0.00000754	0.00000727	0.00001004	0.00000940	0.00001161	0.00001962	0.00037845	0.00001772	0.00002094	0.00001975	0.00005336	0.00005032
107	NPL-KHU-107	Lauraceae	Lindera	obtusiloba	Whole plant	0.00004157	0.00012718	0.00008764	0.00012052	0.00012022	0.00011127	0.00007150	0.00038326	0.00013748	0.00011457	0.00032597	0.00059524	0.00022757	0.00012365	0.00007730	0.00009112	0.00008732	0.00009558	0.00007546	0.00004762	0.00006115	0.00004690	0.00005592	0.00004608	0.00003000	0.00005782	0.00004911	0.00006988	0.00003302	0.00001663	0.00002878	0.00002891	0.00004041	0.00003409	0.00002968	0.00001086	0.00003720	0.00006043	0.00249689	0.00008418	0.00001218	0.00008145	0.00003769	0.00002738
108	NPL-KHU-108	Apiaceae	Foeniculum	vulgare	Seed	0.00000398	0.00002777	0.00001370	0.00001286	0.00004180	0.00216182	0.00000327	0.00001590	0.00000487	0.00001285	0.00001164	0.00000939	0.00000738	0.00001103	0.00000558	0.00000847	0.00002162	0.00000968	0.00000532	0.00000774	0.00000508	0.00000445	0.00000802	0.00000506	0.00001082	0.00000611	0.00006213	0.00001260	0.00001222	0.00001269	0.00001372	0.00001999	0.00002992	0.00006353	0.00005109	0.00004151	0.00004927	0.00004073	0.00073090	0.00003150	0.00003113	0.00006467	0.00003704	0.00010074
109	NPL-KHU-109	Fabaceae	Glycine	max	Seed	0.00001474	0.00001318	0.00000778	0.00000850	0.00001005	0.00000918	0.00000726	0.00000606	0.00001016	0.00001194	0.00000758	0.00000683	0.00000731	0.00000762	0.00001175	0.00000866	0.00000595	0.00002034	0.00001112	0.00000744	0.00001499	0.00013489	0.00001117	0.00001064	0.00000455	0.00001143	0.00001385	0.00001115	0.00015974	0.00008797	0.00000523	0.00000628	0.00000229	0.00000655	0.00000611	0.00000943	0.00000569	0.00001131	0.00040628	0.00000327	0.00000572	0.00002302	0.00005845	0.00006000
110	NPL-KHU-110	Pedaliaceae	Sesamum	indicum	Seed	0.00004871	0.00003295	0.00005343	0.00004298	0.00008882	0.00003351	0.00007327	0.00007216	0.00004180	0.00003111	0.00004095	0.00006597	0.00003468	0.00003412	0.00004303	0.00003235	0.00002999	0.00005333	0.00005613	0.00002758	0.00003007	0.00006977	0.00004775	0.00004825	0.00005287	0.00004816	0.00009885	0.00004873	0.00005517	0.00005856	0.00003421	0.00004236	0.00004986	0.00003849	0.00004133	0.00011058	0.00003045	0.00008906	0.00130637	0.00004761	0.00004338	0.00010496	0.00005127	0.00016791
111	NPL-KIOM-001	Fabaceae	Pueraria	lobata	Root	0.00000806	0.00001300	0.00000315	0.00001106	0.00001021	0.00000893	0.00000373	0.00000688	0.00000346	0.00000577	0.00000250	0.00000269	0.00000429	0.00000460	0.00000155	0.00000166	0.00000116	0.00000287	0.00000099	0.00000137	0.00000043	0.00005109	0.00000268	0.00000092	0.00000006	0.00000005	0.00000001	0.00000000	0.00004149	0.00004289	0.00000000	0.00000000	0.00000006	0.00000000	0.00000000	0.00000000	0.00000000	0.00000116	0.00021007	0.00000703	0.00002146	0.00000000	0.00012012	0.00420098
112	NPL-KIOM-002	Asteraceae	Chrysanthemum	indicum	Flower	0.00001062	0.00001071	0.00001119	0.00000822	0.00001374	0.00000590	0.00000630	0.00000675	0.00001182	0.00000627	0.00000569	0.00000417	0.00000460	0.00000524	0.00000435	0.00001864	0.00001596	0.00001090	0.00001132	0.00000057	0.00000059	0.00001920	0.00000227	0.00000045	0.00000057	0.00000075	0.00000775	0.00000039	0.00001323	0.00000849	0.00000000	0.00000002	0.00000413	0.00000000	0.00000120	0.00000000	0.00000025	0.00000000	0.00076551	0.00000010	0.00000000	0.00008232	0.00000214	0.00000028
113	NPL-KIOM-003	Fabaceae	Glycyrrhiza	glabra	Root	0.00001157	0.00001234	0.00000853	0.00000712	0.00000310	0.00000484	0.00000417	0.00000689	0.00001163	0.00001503	0.00001587	0.00000226	0.00000185	0.00000137	0.00000174	0.00000413	0.00000109	0.00000024	0.00000007	0.00000010	0.00000005	0.00003474	0.00000000	0.00000000	0.00000000	0.00000000	0.00000000	0.00000000	0.00002087	0.00001384	0.00000000	0.00000280	0.00000000	0.00000000	0.00000000	0.00000000	0.00000000	0.00000000	0.00035511	0.00000000	0.00000000	0.00000000	0.00005429	0.00016979
114	NPL-KIOM-004	Fabaceae	Glycyrrhiza	inflata	Root	0.00000722	0.00000912	0.00000665	0.00000574	0.00000300	0.00000312	0.00000416	0.00000266	0.00000148	0.00000807	0.00000847	0.00000120	0.00000042	0.00000009	0.00000338	0.00000010	0.00000017	0.00000002	0.00000000	0.00000000	0.00000001	0.00003685	0.00000000	0.00000000	0.00000000	0.00000000	0.00000000	0.00000000	0.00001306	0.00001694	0.00000000	0.00000000	0.00000000	0.00000000	0.00000000	0.00000000	0.00000000	0.00000000	0.00028517	0.00000020	0.00000000	0.00000000	0.00004189	0.00022322
115	NPL-KIOM-005	Fabaceae	Glycyrrhiza	uralensis	Root	0.00000511	0.00000238	0.00000457	0.00000330	0.00000460	0.00000204	0.00000356	0.00000188	0.00000174	0.00000159	0.00000196	0.00000010	0.00000008	0.00000096	0.00000026	0.00000874	0.00000041	0.00000011	0.00000017	0.00000000	0.00000036	0.00013135	0.00000016	0.00000008	0.00000000	0.00000000	0.00000034	0.00000008	0.00014578	0.00009036	0.00000000	0.00000000	0.00000000	0.00000000	0.00000000	0.00000000	0.00000000	0.00000000	0.00035153	0.00000000	0.00000000	0.00000046	0.00005742	0.00007125
116	NPL-KIOM-006	Apiaceae	Notopterygium	forbesii	Root	0.00001508	0.00001518	0.00000985	0.00001191	0.00001021	0.00000772	0.00001359	0.00003393	0.00001575	0.00000975	0.00000958	0.00001222	0.00001637	0.00001071	0.00001133	0.00000918	0.00008031	0.00000743	0.00000857	0.00000687	0.00000352	0.00000531	0.00006583	0.00000593	0.00006633	0.00000430	0.00000812	0.00000302	0.00000256	0.00000196	0.00000257	0.00000118	0.00000370	0.00000265	0.00000201	0.00000314	0.00026490	0.00044657	0.00026617	0.00002343	0.00006911	0.00007902	0.00103513	0.00011179
117	NPL-KIOM-007	Apiaceae	Notopterygium	incisum	Root	0.00001262	0.00001498	0.00001611	0.00001040	0.00001206	0.00000648	0.00001100	0.00010857	0.00001626	0.00001345	0.00000227	0.00000110	0.00000656	0.00001842	0.00000218	0.00001037	0.00002196	0.00001024	0.00000086	0.00000003	0.00000000	0.00000013	0.00000203	0.00000000	0.00000014	0.00000006	0.00000000	0.00000003	0.00000000	0.00000000	0.00000000	0.00000000	0.00000000	0.00000000	0.00000000	0.00000000	0.00000000	0.00000000	0.00000097	0.00109686	0.00021191	0.00003800	0.00170775	0.00000152
118	NPL-KIOM-008	Apiaceae	Ostericum	koreanum	Root	0.00000764	0.00000950	0.00000566	0.00000925	0.00000817	0.00000340	0.00000437	0.00000824	0.00000459	0.00000236	0.00000301	0.00000632	0.00000570	0.00000348	0.00000276	0.00000184	0.00002601	0.00000224	0.00000239	0.00000027	0.00000052	0.00000777	0.00001985	0.00000016	0.00001790	0.00000010	0.00000258	0.00000000	0.00000174	0.00000069	0.00000013	0.00000000	0.00000020	0.00000000	0.00000000	0.00000000	0.00001248	0.00000005	0.00043656	0.00041686	0.00041404	0.00001390	0.00018310	0.00000212
119	NPL-KIOM-009	Zingiberaceae	Curcuma	longa	Root	0.00003983	0.00002938	0.00005531	0.00002173	0.00002779	0.00002421	0.00007026	0.00013540	0.00002469	0.00003628	0.00003084	0.00001127	0.00001190	0.00002161	0.00006628	0.00002544	0.00003726	0.00003584	0.00000687	0.00000676	0.00000684	0.00000595	0.00000847	0.00000408	0.00000669	0.00000293	0.00001162	0.00000125	0.00000424	0.00000140	0.00000107	0.00000091	0.00000044	0.00000071	0.00000204	0.00000020	0.00000000	0.00000001	0.00176178	0.00000211	0.00000000	0.00000117	0.00000038	0.00000000
120	NPL-KIOM-010	Brassicaceae	Brassica	juncea	Seed, Leaf	0.00002965	0.00002754	0.00003545	0.00002033	0.00002665	0.00002621	0.00002983	0.00003921	0.00002665	0.00003097	0.00003206	0.00002281	0.00001996	0.00002086	0.00001934	0.00001722	0.00002038	0.00002160	0.00004425	0.00000516	0.00001991	0.00002315	0.00001860	0.00002239	0.00001632	0.00003217	0.00002784	0.00002286	0.00002036	0.00000881	0.00002895	0.00001601	0.00001108	0.00000777	0.00000754	0.00000869	0.00000448	0.00001297	0.00046557	0.00001395	0.00000380	0.00003120	0.00000231	0.00001082
121	NPL-KIOM-011	Zingiberaceae	Zingiber	officinale	Root	0.00002311	0.00001910	0.00001454	0.00001890	0.00002543	0.00001569	0.00001152	0.00002244	0.00001927	0.00004520	0.00001817	0.00000986	0.00001249	0.00001700	0.00001075	0.00001077	0.00003717	0.00001749	0.00001555	0.00000563	0.00001371	0.00001076	0.00001420	0.00000278	0.00001096	0.00000433	0.00001040	0.00000287	0.00000537	0.00000091	0.00000095	0.00000054	0.00000053	0.00000051	0.00000403	0.00000027	0.00000004	0.00000000	0.00090944	0.00000201	0.00000060	0.00000547	0.00000084	0.00000019
122	NPL-KIOM-012	Fagaceae	Castanea	crenata	Fruit	0.00001342	0.00001517	0.00001520	0.00001534	0.00002162	0.00004109	0.00002051	0.00001763	0.00002464	0.00001705	0.00001329	0.00001876	0.00001594	0.00001934	0.00002329	0.00001861	0.00001592	0.00002049	0.00002498	0.00001856	0.00001856	0.00004055	0.00001703	0.00000672	0.00001686	0.00001628	0.00002041	0.00001223	0.00004848	0.00001935	0.00001108	0.00000811	0.00001166	0.00000937	0.00000892	0.00000974	0.00002821	0.00001702	0.00035048	0.00001089	0.00000696	0.00002728	0.00000907	0.00001928
123	NPL-KIOM-013	Nymphaeaceae	Euryale	ferox	Seed	0.00012004	0.00015017	0.00015296	0.00027555	0.00018143	0.00015618	0.00017662	0.00019377	0.00023996	0.00023695	0.00023516	0.00020671	0.00017829	0.00012461	0.00023239	0.00012580	0.00027380	0.00025610	0.00029056	0.00025501	0.00026340	0.00019441	0.00011064	0.00019749	0.00020295	0.00018273	0.00024943	0.00022507	0.00021976	0.00020094	0.00018811	0.00028357	0.00021479	0.00014185	0.00024819	0.00029615	0.00021164	0.00027830	0.00613665	0.00022107	0.00024659	0.00021259	0.00016693	0.00022571
124	NPL-KIOM-014	Fabaceae	Cassia	obtusifolia	Seed	0.00001838	0.00002168	0.00001985	0.00002757	0.00001702	0.00001592	0.00001255	0.00000666	0.00002293	0.00001163	0.00001178	0.00000607	0.00001068	0.00001144	0.00000434	0.00000785	0.00000588	0.00000888	0.00000895	0.00000443	0.00000582	0.00014787	0.00000695	0.00001129	0.00000308	0.00000296	0.00000337	0.00000355	0.00015792	0.00009698	0.00000088	0.00000009	0.00000007	0.00000247	0.00000151	0.00000105	0.00001127	0.00000095	0.00037265	0.00000107	0.00000044	0.00002612	0.00000063	0.00000031
125	NPL-KIOM-015	Fabaceae	Cassia	tora	Seed	0.00001589	0.00002141	0.00001346	0.00001970	0.00001446	0.00001074	0.00001582	0.00000713	0.00002113	0.00001290	0.00001081	0.00001108	0.00002157	0.00007259	0.00002529	0.00002643	0.00004521	0.00002721	0.00001261	0.00000708	0.00000645	0.00014220	0.00000385	0.00000826	0.00000862	0.00000410	0.00000304	0.00000341	0.00017156	0.00009563	0.00000862	0.00000686	0.00000889	0.00000817	0.00001979	0.00004561	0.00003567	0.00007105	0.00121337	0.00018325	0.00007452	0.00008027	0.00001753	0.00001921
126	NPL-KIOM-016	Lauraceae	Cinnamomum	cassia	Rind	0.00003045	0.00013314	0.00002537	0.00004445	0.00003573	0.00004570	0.00017994	0.00022132	0.00024122	0.01077404	0.00851048	0.00291789	0.00000639	0.00007736	0.00001477	0.00000645	0.00000129	0.00000127	0.00000367	0.00000072	0.00000224	0.00000588	0.00000176	0.00000217	0.00000199	0.00000053	0.00000273	0.00000261	0.00000332	0.00000004	0.00000140	0.00000270	0.00000148	0.00000085	0.00000015	0.00000159	0.00000407	0.00000345	0.00122885	0.00000299	0.00000030	0.00000034	0.00000131	0.00000043
127	NPL-KIOM-017	Zingiberaceae	Alpinia	officinarum	Root	0.00003150	0.00003841	0.00003112	0.00001736	0.00002578	0.00002415	0.00002162	0.00003315	0.00004159	0.00002339	0.00002019	0.00001925	0.00002342	0.00002567	0.00002649	0.00001358	0.00001568	0.00001512	0.00002003	0.00001919	0.00000794	0.00000550	0.00000499	0.00000069	0.00000415	0.00000552	0.00000429	0.00000229	0.00000211	0.00000639	0.00000148	0.00001576	0.00001968	0.00000412	0.00003699	0.00000018	0.00001008	0.00000912	0.00084371	0.00007432	0.00000345	0.00000131	0.00000023	0.00000365
128	NPL-KIOM-018	Apiaceae	Ligusticum	sinense	Root	0.00000674	0.00000535	0.00000833	0.00000635	0.00000495	0.00000630	0.00000741	0.00002121	0.00000982	0.00000423	0.00000385	0.00000897	0.00000930	0.00000552	0.00000650	0.00000630	0.00005448	0.00000329	0.00000677	0.00000577	0.00000203	0.00000335	0.00004590	0.00000055	0.00004617	0.00000226	0.00000708	0.00000056	0.00000078	0.00000039	0.00000053	0.00000067	0.00000045	0.00000010	0.00000032	0.00000055	0.00000065	0.00000064	0.00014238	0.00000010	0.00000005	0.00003595	0.00000006	0.00000029
129	NPL-KIOM-019	Apiaceae	Ligusticum	tenuissima	Root	0.00000942	0.00000805	0.00000759	0.00001375	0.00001021	0.00000576	0.00000773	0.00001230	0.00001318	0.00000572	0.00001391	0.00001240	0.00001364	0.00000806	0.00000564	0.00000404	0.00008873	0.00001212	0.00001388	0.00001012	0.00000627	0.00000409	0.00008416	0.00000526	0.00007274	0.00000663	0.00001327	0.00000863	0.00000228	0.00000168	0.00000131	0.00000300	0.00000268	0.00000109	0.00000132	0.00000430	0.00001799	0.00000562	0.00021551	0.00000142	0.00000093	0.00001919	0.00000266	0.00000518
130	NPL-KIOM-020	Santalaceae	Viscum	album	Whole plant	0.00000071	0.00000259	0.00000316	0.00000232	0.00000201	0.00000146	0.00000450	0.00000759	0.00000506	0.00000519	0.00000206	0.00000093	0.00000132	0.00000214	0.00000250	0.00000045	0.00000298	0.00000729	0.00000061	0.00000059	0.00000008	0.00000203	0.00000041	0.00000003	0.00000015	0.00000072	0.00000197	0.00000006	0.00000105	0.00000118	0.00000025	0.00000040	0.00000089	0.00000032	0.00000050	0.00000129	0.00000176	0.00000063	0.00057535	0.00000286	0.00000000	0.00000730	0.00000004	0.00000341
131	NPL-KIOM-021	Fabaceae	Caragana	sinica	Root	0.00002669	0.00003191	0.00002807	0.00002261	0.00001475	0.00002242	0.00002539	0.00002112	0.00001172	0.00001499	0.00001612	0.00001991	0.00001407	0.00001844	0.00001966	0.00001738	0.00001116	0.00001826	0.00001802	0.00006715	0.00000871	0.00001403	0.00003931	0.00001029	0.00000495	0.00000423	0.00001034	0.00000763	0.00000645	0.00001697	0.00000646	0.00000442	0.00000733	0.00000153	0.00000673	0.00000187	0.00000501	0.00000124	0.00100364	0.00000204	0.00000105	0.00001500	0.00001026	0.00002927
132	NPL-KIOM-022	Polypodiaceae	Drynaria	fortunei	Root	0.00000739	0.00002303	0.00001826	0.00001308	0.00001855	0.00001125	0.00001355	0.00001465	0.00002532	0.00006430	0.00005572	0.00001991	0.00001426	0.00003796	0.00000865	0.00001937	0.00002118	0.00006142	0.00002240	0.00001336	0.00001003	0.00000760	0.00000414	0.00000160	0.00000555	0.00000200	0.00000361	0.00000285	0.00000307	0.00000191	0.00000143	0.00001185	0.00001129	0.00000040	0.00004036	0.00001319	0.00002376	0.00001390	0.00136467	0.00004292	0.00004014	0.00000853	0.00000586	0.00000373
133	NPL-KIOM-023	Lamiaceae	Agastache	rugosa	Whole plant	0.00002249	0.00002097	0.00002058	0.00002439	0.00001483	0.00002823	0.00002302	0.00002872	0.00001968	0.00000976	0.00000939	0.00006579	0.00008397	0.00002965	0.00001914	0.00002590	0.00008559	0.00001327	0.00000815	0.00001252	0.00000860	0.00000864	0.00005643	0.00000595	0.00004770	0.00000972	0.00000889	0.00000643	0.00000097	0.00000112	0.00000035	0.00000140	0.00000057	0.00000027	0.00000206	0.00000148	0.00000340	0.00000120	0.00096226	0.00000586	0.00000000	0.00000657	0.00000096	0.00000059
134	NPL-KIOM-024	Cucurbitaceae	Trichosanthes	kirilowii	Root	0.00003343	0.00003899	0.00003668	0.00005568	0.00002534	0.00003274	0.00002997	0.00004029	0.00005409	0.00003768	0.00003467	0.00003739	0.00003707	0.00006047	0.00005644	0.00004091	0.00007927	0.00005184	0.00003112	0.00002985	0.00003596	0.00003039	0.00007071	0.00003140	0.00005910	0.00002109	0.00004359	0.00001837	0.00002779	0.00002692	0.00002219	0.00001522	0.00001602	0.00002014	0.00001591	0.00002002	0.00002473	0.00002540	0.00081217	0.00002201	0.00001630	0.00002350	0.00001273	0.00004455
135	NPL-KIOM-025	Cucurbitaceae	Trichosanthes	rosthornii	Root	0.00001770	0.00003406	0.00001874	0.00002551	0.00001999	0.00003176	0.00004676	0.00002431	0.00003525	0.00003172	0.00002968	0.00002400	0.00002607	0.00002838	0.00002450	0.00003016	0.00003598	0.00003290	0.00002317	0.00001876	0.00001206	0.00002226	0.00002709	0.00001604	0.00002788	0.00003752	0.00004771	0.00002359	0.00003315	0.00001715	0.00000757	0.00002042	0.00002381	0.00001102	0.00002105	0.00003187	0.00002206	0.00001823	0.00077281	0.00002607	0.00002180	0.00001086	0.00001233	0.00003246
136	NPL-KIOM-026	Cucurbitaceae	Trichosanthes	kirilowii	Root	0.00004336	0.00005265	0.00007269	0.00003608	0.00005773	0.00006248	0.00008342	0.00006055	0.00005518	0.00007922	0.00004524	0.00008977	0.00008836	0.00008924	0.00007932	0.00004143	0.00003441	0.00007259	0.00005355	0.00004878	0.00006289	0.00016254	0.00004174	0.00005835	0.00004914	0.00003575	0.00007708	0.00006339	0.00018215	0.00008665	0.00006449	0.00005131	0.00004080	0.00003156	0.00004078	0.00010146	0.00004840	0.00004577	0.00201716	0.00002869	0.00002927	0.00006260	0.00003744	0.00006084
137	NPL-KIOM-027	Cucurbitaceae	Trichosanthes	rosthornii	Root	0.00006355	0.00006045	0.00007350	0.00004241	0.00006484	0.00004987	0.00011400	0.00007957	0.00007126	0.00004712	0.00005798	0.00008283	0.00007384	0.00006493	0.00005815	0.00006098	0.00005140	0.00006075	0.00004898	0.00006552	0.00007432	0.00009731	0.00002769	0.00005262	0.00003117	0.00007283	0.00006096	0.00006550	0.00009084	0.00006650	0.00003380	0.00005039	0.00003758	0.00004423	0.00003681	0.00003681	0.00002818	0.00004882	0.00137297	0.00003916	0.00002919	0.00004267	0.00004110	0.00003774
138	NPL-KIOM-028	Lamiaceae	Pogostemon	cablin	Whole plant	0.00003595	0.00002944	0.00003878	0.00002445	0.00002692	0.00002091	0.00002482	0.00002082	0.00002636	0.00002267	0.00001960	0.00001886	0.00006277	0.00002676	0.00002014	0.00002558	0.00002978	0.00002530	0.00000576	0.00000169	0.00000338	0.00006776	0.00000221	0.00000052	0.00000004	0.00000112	0.00000000	0.00000059	0.00006293	0.00002426	0.00000024	0.00000000	0.00000053	0.00000038	0.00000000	0.00000021	0.00000049	0.00000000	0.00134094	0.00002577	0.00000065	0.00000011	0.00000029	0.00000000
139	NPL-KIOM-029	Solanaceae	Lycium	barbarum	Fruit	0.00000875	0.00000745	0.00000659	0.00000732	0.00000863	0.00000561	0.00000519	0.00001051	0.00000690	0.00000752	0.00000703	0.00000339	0.00000508	0.00000584	0.00000586	0.00000815	0.00001892	0.00004232	0.00000654	0.00000319	0.00000377	0.00001904	0.00000748	0.00000307	0.00000456	0.00000100	0.00000588	0.00000353	0.00002148	0.00000854	0.00000325	0.00000143	0.00000224	0.00000030	0.00000360	0.00000173	0.00000510	0.00000429	0.00026007	0.00000092	0.00000167	0.00000327	0.00000896	0.00001211
140	NPL-KIOM-030	Solanaceae	Lycium	chinense	Fruit	0.00000646	0.00000206	0.00000450	0.00000208	0.00000256	0.00000333	0.00000311	0.00000389	0.00000337	0.00000051	0.00000323	0.00000486	0.00000607	0.00000306	0.00000832	0.00002131	0.00005165	0.00011196	0.00000974	0.00000078	0.00000339	0.00003648	0.00000062	0.00000172	0.00000413	0.00000601	0.00001036	0.00001159	0.00006167	0.00002620	0.00000898	0.00003113	0.00003080	0.00000195	0.00004936	0.00001563	0.00006072	0.00003903	0.00072604	0.00002187	0.00001367	0.00000324	0.00000796	0.00000939
141	NPL-KIOM-031	Asteraceae	Chrysanthemum	zawadskii	Flower	0.00002513	0.00001594	0.00001958	0.00001358	0.00002563	0.00002313	0.00002627	0.00003140	0.00001383	0.00001875	0.00001714	0.00002921	0.00003158	0.00002334	0.00002647	0.00002828	0.00004894	0.00002835	0.00003735	0.00001980	0.00000660	0.00001237	0.00000450	0.00000217	0.00000224	0.00000248	0.00000248	0.00000162	0.00000046	0.00000107	0.00000011	0.00000102	0.00000019	0.00000018	0.00000036	0.00000000	0.00000252	0.00000233	0.00060143	0.00000179	0.00000000	0.00000000	0.00000000	0.00000003
142	NPL-KIOM-032	Asteraceae	Chrysanthemum	zawadskii	Flower	0.00001633	0.00001319	0.00002026	0.00001631	0.00001352	0.00001533	0.00001183	0.00001492	0.00000964	0.00000704	0.00000506	0.00001024	0.00001288	0.00000852	0.00001144	0.00001802	0.00005039	0.00003144	0.00001210	0.00000331	0.00000115	0.00000094	0.00000380	0.00000077	0.00000106	0.00000096	0.00000053	0.00000000	0.00000004	0.00000000	0.00000009	0.00000000	0.00000628	0.00000000	0.00000045	0.00000339	0.00000372	0.00000409	0.00052962	0.00002787	0.00000000	0.00000003	0.00000000	0.00000000
143	NPL-KIOM-033	Dicksoniaceae	Cibotium	barometz	Root	0.00002743	0.00001941	0.00002592	0.00001832	0.00002449	0.00002609	0.00002085	0.00002522	0.00005525	0.00002500	0.00001454	0.00001853	0.00001885	0.00003867	0.00001389	0.00000966	0.00001354	0.00000675	0.00000684	0.00000640	0.00000834	0.00001818	0.00002895	0.00000354	0.00000631	0.00000526	0.00000773	0.00000206	0.00001710	0.00003903	0.00000055	0.00000039	0.00000083	0.00000103	0.00000110	0.00000032	0.00000217	0.00000015	0.00000058	0.00007528	0.00021025	0.00000383	0.00000003	0.00000000
144	NPL-KIOM-034	Asteraceae	Chrysanthemum	morifolium	Flower	0.00000955	0.00001593	0.00001113	0.00000940	0.00001159	0.00000769	0.00000636	0.00001042	0.00001102	0.00000677	0.00000471	0.00000944	0.00000610	0.00000746	0.00000610	0.00001074	0.00001475	0.00001078	0.00000874	0.00000065	0.00000082	0.00003545	0.00000118	0.00000073	0.00000061	0.00000020	0.00000384	0.00000014	0.00003191	0.00002185	0.00000001	0.00000000	0.00000113	0.00000000	0.00000033	0.00000000	0.00000000	0.00000000	0.00060227	0.00000117	0.00000000	0.00001648	0.00000057	0.00000008
145	NPL-KIOM-035	Caprifoliaceae	Lonicera	japonica	Flower, Leaf	0.00001431	0.00001548	0.00001134	0.00000968	0.00001436	0.00001513	0.00000962	0.00001692	0.00002903	0.00001393	0.00000361	0.00000453	0.00000279	0.00000696	0.00000885	0.00000383	0.00003374	0.00000550	0.00000305	0.00000321	0.00000196	0.00000038	0.00001827	0.00000020	0.00001529	0.00000109	0.00001130	0.00000012	0.00000008	0.00000000	0.00000000	0.00000000	0.00000614	0.00000000	0.00000074	0.00000000	0.00003588	0.00000000	0.00064151	0.00000023	0.00000000	0.00001481	0.00000061	0.00000000
146	NPL-KIOM-036	Primulaceae	Lysimachia	christinae	Root	0.00002197	0.00002369	0.00002629	0.00002274	0.00003323	0.00003678	0.00002445	0.00002879	0.00003260	0.00001442	0.00001698	0.00001928	0.00000724	0.00000867	0.00006395	0.00002311	0.00002250	0.00001707	0.00001060	0.00001224	0.00000493	0.00002230	0.00000594	0.00001152	0.00000805	0.00000515	0.00001378	0.00000432	0.00001524	0.00000981	0.00000274	0.00000121	0.00000343	0.00000148	0.00000418	0.00000134	0.00000417	0.00000228	0.00070330	0.00004899	0.00000164	0.00000442	0.00000000	0.00000074
147	NPL-KIOM-037	Campanulaceae	Platycodon	grandiflorum	Root	0.00001549	0.00001409	0.00001238	0.00001679	0.00001939	0.00001560	0.00001456	0.00001440	0.00001860	0.00001392	0.00001686	0.00001644	0.00001477	0.00001466	0.00001330	0.00001382	0.00001880	0.00001766	0.00001328	0.00001136	0.00001494	0.00001694	0.00001166	0.00001184	0.00001077	0.00001242	0.00001602	0.00001296	0.00001713	0.00001262	0.00000862	0.00000663	0.00000711	0.00000708	0.00000565	0.00000441	0.00000871	0.00000925	0.00017522	0.00000922	0.00000401	0.00000663	0.00000534	0.00000427
148	NPL-KIOM-038	Brassicaceae	Raphanus	sativus	Root	0.00002452	0.00002922	0.00001407	0.00003815	0.00002908	0.00002859	0.00001960	0.00002304	0.00002069	0.00001536	0.00001251	0.00001736	0.00000791	0.00002356	0.00001249	0.00001633	0.00000907	0.00001013	0.00001676	0.00001062	0.00000603	0.00001611	0.00011527	0.00000609	0.00001013	0.00000345	0.00001905	0.00000425	0.00000543	0.00000344	0.00011335	0.00000370	0.00000198	0.00000092	0.00000050	0.00000612	0.00000045	0.00000287	0.00042216	0.00008981	0.00000009	0.00001868	0.00000039	0.00000074
149	NPL-KIOM-039	Poaceae	Phragmites	communis	Whole plant	0.00002214	0.00001696	0.00002337	0.00001438	0.00001764	0.00003080	0.00002833	0.00002690	0.00001532	0.00001752	0.00001905	0.00001286	0.00001181	0.00001497	0.00001074	0.00002256	0.00002266	0.00003999	0.00001143	0.00001021	0.00001026	0.00001588	0.00000594	0.00000202	0.00000866	0.00000322	0.00000601	0.00000180	0.00000763	0.00000277	0.00000439	0.00000478	0.00000296	0.00000142	0.00000324	0.00000356	0.00000381	0.00000165	0.00040603	0.00000375	0.00000049	0.00000461	0.00000166	0.00000278
150	NPL-KIOM-040	Lamiaceae	Salvia	miltiorrhiza	Root	0.00000342	0.00000406	0.00000660	0.00000725	0.00001245	0.00000883	0.00000302	0.00000711	0.00001041	0.00000896	0.00001407	0.00003050	0.00003166	0.00004177	0.00003557	0.00003010	0.00004812	0.00003715	0.00002417	0.00001446	0.00000928	0.00000638	0.00002123	0.00000799	0.00001864	0.00001188	0.00000665	0.00000833	0.00001397	0.00001584	0.00001084	0.00000423	0.00000299	0.00000222	0.00000722	0.00000771	0.00000067	0.00000006	0.00016152	0.00000040	0.00000000	0.00000010	0.00000028	0.00000000
151	NPL-KIOM-041	Apiaceae	Angelica	gigas	Root	0.00001286	0.00000667	0.00000918	0.00000957	0.00000594	0.00000709	0.00000709	0.00001188	0.00000893	0.00000350	0.00000695	0.00001032	0.00000741	0.00000615	0.00000636	0.00000581	0.00002436	0.00000352	0.00000342	0.00000443	0.00000232	0.00000351	0.00001456	0.00000149	0.00001239	0.00000077	0.00000791	0.00000225	0.00000066	0.00000066	0.00000039	0.00000020	0.00000078	0.00000000	0.00000009	0.00000003	0.00000894	0.00000002	0.00030529	0.00000018	0.00000094	0.00000325	0.00000268	0.00000041
152	NPL-KIOM-042	Campanulaceae	Codonopsis	pilosula	Root	0.00001490	0.00001612	0.00001518	0.00001576	0.00001572	0.00001400	0.00001670	0.00002152	0.00001408	0.00001532	0.00001277	0.00001103	0.00001340	0.00001262	0.00001176	0.00000958	0.00001484	0.00001483	0.00001408	0.00001563	0.00001696	0.00002180	0.00001176	0.00001159	0.00001012	0.00001051	0.00001243	0.00000974	0.00001923	0.00001464	0.00000300	0.00000400	0.00000792	0.00000173	0.00000490	0.00000248	0.00000339	0.00000456	0.00023782	0.00000331	0.00000136	0.00000553	0.00000268	0.00000284
153	NPL-KIOM-043	Campanulaceae	Codonopsis	tangshen	Root	0.00001030	0.00000712	0.00000857	0.00000993	0.00000985	0.00000962	0.00001012	0.00001301	0.00000811	0.00000996	0.00000941	0.00000900	0.00001082	0.00000971	0.00000570	0.00001447	0.00001353	0.00002401	0.00000779	0.00001024	0.00000412	0.00001970	0.00000441	0.00000607	0.00000425	0.00000890	0.00002041	0.00000805	0.00002514	0.00001015	0.00000115	0.00000333	0.00000344	0.00000181	0.00000298	0.00000232	0.00000634	0.00000369	0.00028032	0.00000080	0.00000134	0.00001003	0.00000192	0.00000651
154	NPL-KIOM-044	Campanulaceae	Codonopsis	pilosula	Root	0.00002258	0.00002212	0.00001991	0.00003793	0.00001929	0.00001757	0.00002739	0.00004014	0.00002049	0.00001745	0.00001830	0.00001933	0.00002836	0.00003005	0.00001883	0.00002833	0.00002690	0.00003146	0.00001208	0.00001941	0.00002321	0.00003349	0.00001722	0.00000969	0.00001530	0.00001910	0.00000460	0.00001359	0.00002815	0.00001303	0.00000998	0.00000544	0.00000616	0.00000761	0.00000944	0.00000571	0.00000181	0.00000231	0.00110357	0.00004449	0.00000779	0.00002655	0.00001330	0.00001342
155	NPL-KIOM-045	Arecaceae	Areca	catechu	Seed	0.00005517	0.00007078	0.00004103	0.00004302	0.00004116	0.00003129	0.00007895	0.00007474	0.00004754	0.00003186	0.00003030	0.00005186	0.00006332	0.00003301	0.00003891	0.00004505	0.00002369	0.00003773	0.00001758	0.00002656	0.00001735	0.00143080	0.00005141	0.00001305	0.00001972	0.00002376	0.00004372	0.00001897	0.00206176	0.00109121	0.00003422	0.00001215	0.00004707	0.00002468	0.00002057	0.00005364	0.00006045	0.00003002	0.00120167	0.00004206	0.00001689	0.00009290	0.00002613	0.00002223
156	NPL-KIOM-046	Rhamnaceae	Zizyphus	jujuba	Fruit	0.00001076	0.00001277	0.00001094	0.00001096	0.00001465	0.00001696	0.00001169	0.00001488	0.00001389	0.00001317	0.00001655	0.00001335	0.00001362	0.00002404	0.00001326	0.00002162	0.00002487	0.00002598	0.00001703	0.00000894	0.00000877	0.00000608	0.00000735	0.00000407	0.00000596	0.00000437	0.00000752	0.00000862	0.00000540	0.00000413	0.00000391	0.00000665	0.00000458	0.00000186	0.00000337	0.00000188	0.00000066	0.00000192	0.00035722	0.00000723	0.00000314	0.00000282	0.00000516	0.00001782
157	NPL-KIOM-047	Rhamnaceae	Zizyphus	jujuba	Fruit	0.00001426	0.00001493	0.00001252	0.00001184	0.00001157	0.00001834	0.00001531	0.00001321	0.00001375	0.00001398	0.00001467	0.00001539	0.00001046	0.00001570	0.00001170	0.00001766	0.00001948	0.00003506	0.00001418	0.00001111	0.00000581	0.00000726	0.00000704	0.00000688	0.00000827	0.00000741	0.00000878	0.00000569	0.00000750	0.00000565	0.00000503	0.00000240	0.00000474	0.00000199	0.00000551	0.00000301	0.00000227	0.00000329	0.00033922	0.00000620	0.00000223	0.00000186	0.00000328	0.00004621
158	NPL-KIOM-048	Rosaceae	Prunus	davidiana	Seed	0.00006446	0.00052284	0.00005895	0.00007703	0.00007998	0.00006013	0.00007523	0.00006151	0.00008720	0.00008470	0.00006896	0.00006524	0.00006457	0.00007359	0.00007938	0.00007211	0.00006873	0.00006326	0.00007150	0.00006324	0.00008289	0.00005595	0.00007609	0.00007631	0.00011566	0.00009283	0.00004177	0.00004975	0.00007060	0.00006391	0.00005227	0.00004102	0.00005534	0.00005867	0.00004928	0.00005253	0.00004935	0.00005655	0.00101666	0.00005631	0.00003722	0.00005624	0.00002241	0.00003024
159	NPL-KIOM-049	Rosaceae	Prunus	persica	Fruit	0.00003044	0.00068966	0.00002068	0.00001382	0.00002125	0.00002663	0.00002515	0.00001970	0.00001559	0.00002428	0.00001877	0.00001906	0.00001704	0.00001435	0.00002739	0.00002471	0.00002311	0.00001293	0.00002428	0.00001088	0.00002227	0.00002130	0.00002049	0.00001339	0.00001197	0.00002042	0.00003822	0.00000763	0.00000868	0.00001577	0.00002788	0.00002165	0.00001245	0.00001336	0.00000939	0.00004006	0.00001700	0.00003321	0.00069829	0.00002188	0.00001633	0.00002573	0.00002385	0.00005176
160	NPL-KIOM-050	Araliaceae	Aralia	continentalis	Root	0.00001533	0.00001414	0.00001946	0.00000969	0.00001735	0.00000945	0.00003035	0.00007023	0.00001691	0.00002652	0.00001777	0.00001756	0.00000948	0.00001599	0.00000628	0.00000548	0.00003929	0.00000751	0.00000816	0.00000751	0.00000542	0.00000129	0.00002875	0.00000439	0.00002681	0.00000403	0.00000739	0.00000131	0.00000068	0.00000011	0.00000051	0.00000150	0.00000240	0.00000028	0.00000139	0.00000484	0.00004663	0.00004449	0.00066531	0.00000228	0.00000076	0.00009114	0.00000355	0.00000068
161	NPL-KIOM-051	Eucommiaceae	Eucommia	ulmoides	Rind	0.00003064	0.00003774	0.00004616	0.00005278	0.00003914	0.00006074	0.00006547	0.00008990	0.00016519	0.00004931	0.00008001	0.00007998	0.00012265	0.00003989	0.00003163	0.00003836	0.00008441	0.00002444	0.00001428	0.00000372	0.00000352	0.00000250	0.00000409	0.00000500	0.00000207	0.00000149	0.00000345	0.00002628	0.00000124	0.00000383	0.00002721	0.00000020	0.00000063	0.00000613	0.00000000	0.00002714	0.00000000	0.00000000	0.00043211	0.00666543	0.00002778	0.00000268	0.00000016	0.00003133
162	NPL-KIOM-052	Eucommiaceae	Eucommia	ulmoides	Rind	0.00002941	0.00002421	0.00001736	0.00001962	0.00002127	0.00002384	0.00003623	0.00003545	0.00004015	0.00002644	0.00001700	0.00003394	0.00003272	0.00002014	0.00002428	0.00001907	0.00001021	0.00000784	0.00000803	0.00000518	0.00000556	0.00000501	0.00000221	0.00000141	0.00000272	0.00000112	0.00000660	0.00000498	0.00000081	0.00000227	0.00000184	0.00000104	0.00000202	0.00000027	0.00000082	0.00000625	0.00000114	0.00000046	0.00203215	0.00029963	0.00000211	0.00000207	0.00000007	0.00000461
163	NPL-KIOM-053	Cannabaceae	Cannabis	sativa	Whole plant	0.00005881	0.00007727	0.00011345	0.00006148	0.00007953	0.00010378	0.00007965	0.00009633	0.00010639	0.00005465	0.00008585	0.00007247	0.00006864	0.00006029	0.00008338	0.00006267	0.00006948	0.00007399	0.00007714	0.00003245	0.00008838	0.00138076	0.00006243	0.00006407	0.00007196	0.00007638	0.00012016	0.00005240	0.00188302	0.00084049	0.00003997	0.00005852	0.00006571	0.00004797	0.00006412	0.00008855	0.00004215	0.00003920	0.00223339	0.00006051	0.00007336	0.00008796	0.00008530	0.00006954
164	NPL-KIOM-054	Portulacaceae	Portulaca	oleracea	Whole plant	0.00000023	0.00000020	0.00000235	0.00000014	0.00000132	0.00000003	0.00000195	0.00000363	0.00001259	0.00000021	0.00000095	0.00000087	0.00000048	0.00000084	0.00000021	0.00001032	0.00003679	0.00001152	0.00000257	0.00000053	0.00000007	0.00013611	0.00000038	0.00000039	0.00000000	0.00000040	0.00001358	0.00000054	0.00016393	0.00009468	0.00000243	0.00002652	0.00016411	0.00000477	0.00031308	0.00005060	0.00012219	0.00020136	0.00224060	0.00041612	0.00006799	0.00053117	0.00004142	0.00009059
165	NPL-KIOM-055	Ephedraceae	Ephedra	sinica	Whole plant	0.00002018	0.00002650	0.00001467	0.00002294	0.00000950	0.00002345	0.00001379	0.00002952	0.00001569	0.00000577	0.00001811	0.00001650	0.00001768	0.00002170	0.00000828	0.00000992	0.00000387	0.00001513	0.00001253	0.00000362	0.00000285	0.00004128	0.00001297	0.00000158	0.00000099	0.00000240	0.00000696	0.00000458	0.00002725	0.00003686	0.00000120	0.00000012	0.00000097	0.00000015	0.00000040	0.00000102	0.00001476	0.00000000	0.00116627	0.00001984	0.00000021	0.00000000	0.00000036	0.00000328
166	NPL-KIOM-056	Ephedraceae	Ephedra	intermedia	Whole plant	0.00001262	0.00001374	0.00000967	0.00000265	0.00000580	0.00000533	0.00000793	0.00000778	0.00000408	0.00000221	0.00000423	0.00000070	0.00000423	0.00000130	0.00000294	0.00000131	0.00000113	0.00000000	0.00000045	0.00000000	0.00000016	0.00000000	0.00003422	0.00000000	0.00000000	0.00000000	0.00000031	0.00000000	0.00000000	0.00001579	0.00001152	0.00000000	0.00000000	0.00000000	0.00000000	0.00000000	0.00000000	0.00000001	0.00046746	0.00000059	0.00000000	0.00000000	0.00000061	0.00000000
167	NPL-KIOM-057	Ephedraceae	Ephedra	equisetina	Whole plant	0.00001112	0.00001338	0.00000836	0.00000643	0.00000337	0.00001113	0.00000556	0.00002389	0.00000244	0.00000281	0.00000777	0.00000572	0.00000963	0.00000186	0.00000024	0.00000030	0.00000027	0.00000046	0.00000028	0.00000005	0.00000003	0.00000011	0.00000249	0.00000000	0.00000000	0.00000000	0.00000001	0.00000000	0.00000000	0.00000000	0.00000000	0.00000000	0.00000000	0.00000000	0.00000000	0.00000000	0.00000000	0.00000000	0.00057036	0.00000000	0.00000000	0.00000000	0.00000000	0.00000000
168	NPL-KIOM-058	Ephedraceae	Ephedra	intermedia	Whole plant	0.00001985	0.00003351	0.00002933	0.00002376	0.00001977	0.00001404	0.00003694	0.00002466	0.00001613	0.00001513	0.00001028	0.00001747	0.00003470	0.00001143	0.00001125	0.00001341	0.00001539	0.00000697	0.00001793	0.00000458	0.00001188	0.00004874	0.00000445	0.00000139	0.00000238	0.00000179	0.00000584	0.00000247	0.00003169	0.00002524	0.00000130	0.00000098	0.00000158	0.00000100	0.00000174	0.00006796	0.00000635	0.00000003	0.00118153	0.00009766	0.00000022	0.00000100	0.00000012	0.00000027
169	NPL-KIOM-059	Ephedraceae	Ephedra	equisetina	Whole plant	0.00001968	0.00004266	0.00003358	0.00002709	0.00002094	0.00001657	0.00002746	0.00005910	0.00005651	0.00001662	0.00002537	0.00013153	0.00017677	0.00002663	0.00001483	0.00002655	0.00001768	0.00001136	0.00000487	0.00001306	0.00001192	0.00007267	0.00000466	0.00000472	0.00000380	0.00000178	0.00000558	0.00000310	0.00004004	0.00004957	0.00000174	0.00000158	0.00000538	0.00000044	0.00000045	0.00000033	0.00000047	0.00000079	0.00116038	0.00000511	0.00000239	0.00000171	0.00000041	0.00000418
170	NPL-KIOM-060	Verbenaceae	Vitex	rotundifolia	Seed	0.00002698	0.00002562	0.00003491	0.00002549	0.00003384	0.00003377	0.00003465	0.00006132	0.00003145	0.00002763	0.00001036	0.00006447	0.00004974	0.00001418	0.00001603	0.00008500	0.00001837	0.00001380	0.00001728	0.00001232	0.00001663	0.00001503	0.00001941	0.00002610	0.00003046	0.00002669	0.00001129	0.00001334	0.00001262	0.00001938	0.00002016	0.00001546	0.00001126	0.00001059	0.00000937	0.00001377	0.00000801	0.00000674	0.00168597	0.00001549	0.00000780	0.00000352	0.00001472	0.00000619
171	NPL-KIOM-061	Verbenaceae	Vitex	trifolia	Seed	0.00005048	0.00001362	0.00004134	0.00025665	0.00002120	0.00007489	0.00008284	0.00002785	0.00002481	0.00001490	0.00001024	0.00012337	0.00006297	0.00001948	0.00004529	0.00001420	0.00001835	0.00001825	0.00000961	0.00001457	0.00000570	0.00000448	0.00000908	0.00000957	0.00003096	0.00000921	0.00001395	0.00000797	0.00003029	0.00004164	0.00004328	0.00001273	0.00004291	0.00002896	0.00002834	0.00002034	0.00000070	0.00000611	0.00233074	0.00003807	0.00001256	0.00000031	0.00000456	0.00000132
172	NPL-KIOM-062	Asparagaceae	Liriope	platyphylla	Root	0.00000759	0.00000757	0.00000926	0.00001201	0.00000811	0.00000887	0.00001017	0.00000933	0.00000968	0.00001246	0.00001158	0.00001093	0.00000959	0.00001185	0.00000869	0.00001239	0.00001231	0.00001463	0.00000896	0.00001270	0.00001424	0.00001936	0.00001229	0.00001147	0.00001257	0.00001232	0.00001656	0.00001194	0.00002036	0.00001608	0.00001105	0.00001046	0.00001274	0.00000733	0.00001258	0.00001178	0.00001224	0.00001251	0.00015264	0.00000655	0.00001183	0.00000989	0.00000634	0.00000826
173	NPL-KIOM-063	Asparagaceae	Ophiopogon	japonicus	Root	0.00000800	0.00000537	0.00001277	0.00000806	0.00000718	0.00000669	0.00000833	0.00000778	0.00000909	0.00000836	0.00000754	0.00000880	0.00000951	0.00000945	0.00000782	0.00000978	0.00001074	0.00001290	0.00000780	0.00000802	0.00000743	0.00001014	0.00000652	0.00001173	0.00000826	0.00000609	0.00000958	0.00000845	0.00000841	0.00000815	0.00000750	0.00000892	0.00000694	0.00000762	0.00000880	0.00000818	0.00000812	0.00001060	0.00017348	0.00000450	0.00000446	0.00000617	0.00000396	0.00000477
174	NPL-KIOM-064	Poaceae	Hordeum	vulgare	Whole plant	0.00002758	0.00001908	0.00001642	0.00002068	0.00002754	0.00002134	0.00003347	0.00002218	0.00002533	0.00002596	0.00001308	0.00002082	0.00001037	0.00005340	0.00001868	0.00002128	0.00002436	0.00001455	0.00001539	0.00001726	0.00000948	0.00001868	0.00001905	0.00001213	0.00001273	0.00000513	0.00001741	0.00001097	0.00001172	0.00000997	0.00000617	0.00000692	0.00001094	0.00000528	0.00000117	0.00000122	0.00000180	0.00000318	0.00065961	0.00003394	0.00001409	0.00005148	0.00000972	0.00000873
175	NPL-KIOM-065	Rosaceae	Chaenomeles	sinensis	Fruit	0.00002474	0.00002782	0.00001770	0.00002072	0.00001699	0.00001873	0.00002174	0.00002297	0.00002419	0.00001448	0.00001449	0.00000932	0.00001495	0.00002121	0.00002126	0.00000887	0.00001477	0.00001457	0.00001081	0.00000894	0.00000756	0.00000598	0.00002600	0.00000454	0.00000212	0.00000386	0.00000318	0.00000357	0.00000558	0.00002049	0.00000072	0.00000007	0.00000171	0.00000011	0.00000000	0.00000145	0.00000050	0.00000000	0.00000006	0.00034680	0.00007245	0.00000000	0.00000260	0.00000009
176	NPL-KIOM-066	Rosaceae	Chaenomeles	speciosa	Fruit	0.00002412	0.00002862	0.00001832	0.00002003	0.00002540	0.00001555	0.00001895	0.00001357	0.00001875	0.00002046	0.00001765	0.00001224	0.00001311	0.00001229	0.00000952	0.00000691	0.00000920	0.00000182	0.00000326	0.00000268	0.00000271	0.00000408	0.00002407	0.00000225	0.00000122	0.00000054	0.00000077	0.00000000	0.00000578	0.00000921	0.00000135	0.00000042	0.00000000	0.00000009	0.00000041	0.00000000	0.00000000	0.00000000	0.00000000	0.00000000	0.00032987	0.00003456	0.00000000	0.00000000
177	NPL-KIOM-067	Paeoniaceae	Paeonia	suffruticosa	Root	0.00001318	0.00000862	0.00001293	0.00001005	0.00000826	0.00001552	0.00000654	0.00002153	0.00001419	0.00000507	0.00000972	0.00000972	0.00000579	0.00000888	0.00000266	0.00000962	0.00002953	0.00000957	0.00000155	0.00000143	0.00000198	0.00000161	0.00000046	0.00000016	0.00000000	0.00000002	0.00000083	0.00000004	0.00000022	0.00000023	0.00000000	0.00000000	0.00000010	0.00000000	0.00000014	0.00000000	0.00000000	0.00000000	0.00051806	0.00000016	0.00000000	0.00000930	0.00000007	0.00000000
178	NPL-KIOM-068	Equisetaceae	Equisetum	hyemale	Whole plant	0.00001871	0.00001674	0.00002257	0.00002657	0.00002181	0.00001718	0.00002331	0.00001517	0.00002713	0.00001392	0.00001606	0.00001264	0.00001948	0.00001783	0.00001230	0.00001831	0.00002037	0.00002425	0.00001182	0.00000865	0.00000998	0.00000741	0.00001259	0.00000504	0.00000620	0.00001025	0.00001146	0.00000512	0.00000468	0.00000522	0.00000381	0.00000193	0.00000154	0.00000127	0.00000287	0.00000370	0.00000627	0.00000329	0.00072678	0.00003027	0.00000173	0.00001878	0.00000298	0.00033193
179	NPL-KIOM-069	Lardizabalaceae	Akebia	quinata	Fruit	0.00003457	0.00002996	0.00003050	0.00003853	0.00004194	0.00005071	0.00003653	0.00005638	0.00003698	0.00005441	0.00003679	0.00003963	0.00004050	0.00003806	0.00003060	0.00002401	0.00003857	0.00002674	0.00002109	0.00002323	0.00002420	0.00002209	0.00001075	0.00001735	0.00001527	0.00001641	0.00002201	0.00001396	0.00002014	0.00001165	0.00000743	0.00001321	0.00001024	0.00001067	0.00000995	0.00000484	0.00000935	0.00000489	0.00146866	0.00003139	0.00000652	0.00000856	0.00000340	0.00000262
180	NPL-KIOM-070	Asteraceae	Aucklandia	lappa	Root	0.00001523	0.00001413	0.00001388	0.00001370	0.00001258	0.00000989	0.00001267	0.00002130	0.00001245	0.00001044	0.00001928	0.00001799	0.00001645	0.00005223	0.00001819	0.00000897	0.00001347	0.00002247	0.00001022	0.00000575	0.00000333	0.00001592	0.00000448	0.00000264	0.00000466	0.00000231	0.00000255	0.00000076	0.00001314	0.00000748	0.00000163	0.00000315	0.00000632	0.00000113	0.00000462	0.00000002	0.00000596	0.00000459	0.00034674	0.00000955	0.00000214	0.00000000	0.00000001	0.00000000
181	NPL-KIOM-071	Lamiaceae	Mentha	arvensis	Whole plant	0.00002254	0.00002159	0.00001760	0.00001249	0.00001380	0.00001740	0.00001933	0.00001714	0.00002041	0.00000728	0.00000595	0.00002066	0.00001710	0.00001271	0.00001018	0.00001140	0.00004912	0.00001910	0.00000705	0.00000246	0.00000109	0.00000158	0.00002192	0.00000256	0.00000848	0.00001069	0.00001088	0.00000144	0.00000026	0.00000004	0.00000060	0.00000154	0.00000478	0.00000000	0.00000424	0.00000135	0.00000000	0.00000131	0.00090059	0.00006365	0.00000036	0.00000005	0.00000002	0.00000083
182	NPL-KIOM-072	Araceae	Pinellia	ternata	Root	0.00004908	0.00006011	0.00007394	0.00004917	0.00003937	0.00003861	0.00006842	0.00006756	0.00010314	0.00005416	0.00006417	0.00004788	0.00005660	0.00005167	0.00007700	0.00002652	0.00002979	0.00006542	0.00006466	0.00005904	0.00004393	0.00009474	0.00005674	0.00002682	0.00004127	0.00006230	0.00007924	0.00003476	0.00010339	0.00005963	0.00005503	0.00004739	0.00004569	0.00005451	0.00006508	0.00006843	0.00010060	0.00006991	0.00233748	0.00003479	0.00003474	0.00026406	0.00004526	0.00013097
183	NPL-KIOM-073	Menispermaceae	Sinomenium	acutum	Root	0.00000606	0.00000348	0.00000345	0.00000061	0.00000411	0.00000371	0.00000203	0.00000373	0.00000642	0.00001678	0.00000469	0.00004740	0.00000175	0.00000194	0.00000053	0.00000332	0.00000260	0.00000329	0.00000050	0.00000168	0.00000000	0.00003197	0.00000126	0.00000041	0.00000005	0.00000047	0.00000161	0.00000038	0.00002124	0.00001648	0.00000357	0.00000350	0.00000046	0.00000935	0.00000681	0.00000958	0.00002761	0.00000064	0.00052473	0.00000108	0.00000304	0.00000451	0.00000183	0.00001709
184	NPL-KIOM-074	Apiaceae	Saposhnikovia	divaricata	Root	0.00000380	0.00000634	0.00000413	0.00000642	0.00000475	0.00000716	0.00000602	0.00001261	0.00000781	0.00000193	0.00000239	0.00000261	0.00000323	0.00000955	0.00000099	0.00000498	0.00004734	0.00001717	0.00000433	0.00000166	0.00000426	0.00003448	0.00002497	0.00000009	0.00000986	0.00001510	0.00000031	0.00000043	0.00002802	0.00002273	0.00000027	0.00000000	0.00000000	0.00000007	0.00000015	0.00000286	0.00000128	0.00000026	0.00007630	0.00164857	0.00000041	0.00004356	0.00000133	0.00000486
185	NPL-KIOM-075	Ginkgoaceae	Ginkgo	biloba	Leaf	0.00004579	0.00002881	0.00003431	0.00002466	0.00003258	0.00003635	0.00003198	0.00004369	0.00003416	0.00001465	0.00002457	0.00003438	0.00001905	0.00003310	0.00003435	0.00003261	0.00003027	0.00004421	0.00002080	0.00003319	0.00003197	0.00007724	0.00002098	0.00002940	0.00002202	0.00000917	0.00003307	0.00002239	0.00008228	0.00003731	0.00003005	0.00002646	0.00001491	0.00002307	0.00002284	0.00002992	0.00004339	0.00003125	0.00103503	0.00001960	0.00003297	0.00009269	0.00002216	0.00003294
186	NPL-KIOM-076	Papaveraceae	Chelidonium	majus	Whole plant	0.00000959	0.00001277	0.00000888	0.00000443	0.00000715	0.00001138	0.00001544	0.00001248	0.00002491	0.00001778	0.00112637	0.00005644	0.00002536	0.00001853	0.00018904	0.00001903	0.00001439	0.00000521	0.00007111	0.00000199	0.00000107	0.00012733	0.00000386	0.00000412	0.00000028	0.00000049	0.00000191	0.00000000	0.00009948	0.00011199	0.00000000	0.00000000	0.00000002	0.00000045	0.00000033	0.00000116	0.00005906	0.00094619	0.00047758	0.00002473	0.00000000	0.00003845	0.00000000	0.00000120
187	NPL-KIOM-077	Zingiberaceae	Amomum	kravanh	Seed	0.00002796	0.00002283	0.00001721	0.00001648	0.00002159	0.00002429	0.00002845	0.00009665	0.00007868	0.00001950	0.00002842	0.00001039	0.00001726	0.00002828	0.00003011	0.00002395	0.00001633	0.00001147	0.00000586	0.00000776	0.00001440	0.00010190	0.00001028	0.00001505	0.00000843	0.00000942	0.00001268	0.00001374	0.00011995	0.00004498	0.00000630	0.00000721	0.00000974	0.00000642	0.00001113	0.00000470	0.00003220	0.00001020	0.00181606	0.00001963	0.00002145	0.00006216	0.00002369	0.00002251
188	NPL-KIOM-078	Zingiberaceae	Amomum	compactum	Seed	0.00002660	0.00003645	0.00002036	0.00003352	0.00003241	0.00002906	0.00003619	0.00004077	0.00007140	0.00003758	0.00001927	0.00002693	0.00001946	0.00001964	0.00003251	0.00001708	0.00002128	0.00001991	0.00001739	0.00003132	0.00000761	0.00005756	0.00001483	0.00001375	0.00001980	0.00000956	0.00001658	0.00001171	0.00007066	0.00002113	0.00001306	0.00002575	0.00002354	0.00000809	0.00000704	0.00001978	0.00003847	0.00000903	0.00106839	0.00001130	0.00001058	0.00003183	0.00001105	0.00001731
189	NPL-KIOM-079	Apocynaceae	Cynanchum	wilfordii	Root	0.00000442	0.00000937	0.00000882	0.00000861	0.00000625	0.00000764	0.00000700	0.00000840	0.00000969	0.00000617	0.00000787	0.00000572	0.00000530	0.00000502	0.00000301	0.00000599	0.00000745	0.00000701	0.00000364	0.00000418	0.00000569	0.00000117	0.00000161	0.00000177	0.00000620	0.00000165	0.00005718	0.00000141	0.00000057	0.00000032	0.00000407	0.00000012	0.00000049	0.00000046	0.00000112	0.00002281	0.00002893	0.00000147	0.00039462	0.00000010	0.00000009	0.00003053	0.00000049	0.00000453
190	NPL-KIOM-080	Apiaceae	Angelica	dahurica	Root	0.00000605	0.00000665	0.00001065	0.00001075	0.00001124	0.00000680	0.00000645	0.00000822	0.00002047	0.00000763	0.00000464	0.00000319	0.00000298	0.00005002	0.00000332	0.00000514	0.00008282	0.00002299	0.00000852	0.00000142	0.00000211	0.00000200	0.00005081	0.00000228	0.00002468	0.00002670	0.00000631	0.00000028	0.00000029	0.00000008	0.00000052	0.00000097	0.00000130	0.00000012	0.00000022	0.00000216	0.00000514	0.00000465	0.00011682	0.00046972	0.00003002	0.00050320	0.00012066	0.00017648
191	NPL-KIOM-081	Apiaceae	Angelica	dahurica	Root	0.00000430	0.00000571	0.00000292	0.00000340	0.00000260	0.00000242	0.00000134	0.00000507	0.00000269	0.00000040	0.00000226	0.00000210	0.00000232	0.00000202	0.00000074	0.00000114	0.00003537	0.00000223	0.00000037	0.00000016	0.00000010	0.00006688	0.00002530	0.00000013	0.00002545	0.00000004	0.00000649	0.00000000	0.00008839	0.00002927	0.00000000	0.00000003	0.00000001	0.00000000	0.00000005	0.00000117	0.00000839	0.00000047	0.00033575	0.00036141	0.00038608	0.00096509	0.00025213	0.00000885
192	NPL-KIOM-082	Asteraceae	Atractylodes	japonica	Root	0.00001312	0.00001640	0.00001426	0.00001116	0.00001504	0.00001665	0.00001028	0.00001754	0.00001002	0.00001070	0.00000841	0.00001166	0.00000582	0.00000692	0.00000665	0.00001037	0.00000857	0.00001973	0.00000358	0.00000168	0.00000524	0.00000263	0.00000791	0.00000482	0.00000212	0.00000355	0.00002179	0.00000081	0.00000172	0.00000000	0.00000074	0.00000067	0.00001155	0.00000001	0.00000065	0.00000066	0.00000128	0.00000012	0.00038381	0.00000008	0.00000000	0.00000124	0.00000014	0.00000493
193	NPL-KIOM-083	Asteraceae	Atractylodes	macrocephala	Root	0.00001110	0.00000932	0.00000996	0.00001194	0.00001039	0.00000840	0.00000938	0.00001614	0.00001192	0.00000847	0.00001069	0.00001366	0.00000812	0.00000556	0.00001213	0.00001777	0.00000939	0.00002023	0.00000385	0.00000533	0.00000473	0.00000663	0.00000640	0.00000663	0.00000563	0.00000367	0.00001651	0.00000135	0.00000331	0.00000512	0.00000403	0.00000621	0.00001295	0.00000090	0.00000318	0.00000324	0.00003172	0.00003079	0.00057689	0.00000601	0.00001138	0.00000495	0.00000331	0.00000583
194	NPL-KIOM-084	Fabaceae	Dolichos	lablab	Fruit	0.00004139	0.00003170	0.00002196	0.00002819	0.00004484	0.00001983	0.00002509	0.00003916	0.00003645	0.00002691	0.00004164	0.00005581	0.00004464	0.00004928	0.00004887	0.00004268	0.00003999	0.00008822	0.00005950	0.00004542	0.00004066	0.00380957	0.00005956	0.00002924	0.00003999	0.00007985	0.00003705	0.00004999	0.00559281	0.00204607	0.00002437	0.00002097	0.00002666	0.00003045	0.00002118	0.00002569	0.00005402	0.00003072	0.00087630	0.00003222	0.00002097	0.00005714	0.00002165	0.00004608
195	NPL-KIOM-085	Rubiaceae	Hedyotis	diffusa	Whole plant	0.00001907	0.00001449	0.00001178	0.00000591	0.00000593	0.00000940	0.00001733	0.00002443	0.00001559	0.00002731	0.00001725	0.00001262	0.00001884	0.00000332	0.00000896	0.00000594	0.00000685	0.00000578	0.00000318	0.00000202	0.00000419	0.00000144	0.00000472	0.00000222	0.00000027	0.00000287	0.00000432	0.00000148	0.00000174	0.00000034	0.00000056	0.00000027	0.00000158	0.00000002	0.00000010	0.00000020	0.00000000	0.00000001	0.00029946	0.00075280	0.00000000	0.00001127	0.00001675	0.00005721
196	NPL-KIOM-086	Fabaceae	Psoralea	corylifolia	Seed	0.00001162	0.00000908	0.00000795	0.00000689	0.00000720	0.00000654	0.00000134	0.00031647	0.00001072	0.00012153	0.00000230	0.00000250	0.00000051	0.00000343	0.00000267	0.00000225	0.00001324	0.00000055	0.00000037	0.00000000	0.00000000	0.00066036	0.00000010	0.00000000	0.00000008	0.00000000	0.00000000	0.00000000	0.00094669	0.00034166	0.00000000	0.00000000	0.00000000	0.00000000	0.00000000	0.00000001	0.00000000	0.00000000	0.00051692	0.00000000	0.00000000	0.00001029	0.00000100	0.00002808
197	NPL-KIOM-087	Polyporaceae	Poria	cocos	Mycelium	0.00012559	0.00014217	0.00009824	0.00007104	0.00010102	0.00014922	0.00007006	0.00013310	0.00012404	0.00014199	0.00012985	0.00013287	0.00014289	0.00013491	0.00009890	0.00014019	0.00016848	0.00015220	0.00008341	0.00008841	0.00007939	0.00010968	0.00008315	0.00010040	0.00005451	0.00009167	0.00012022	0.00009327	0.00015241	0.00010945	0.00008388	0.00013741	0.00011612	0.00007493	0.00015685	0.00002080	0.00006906	0.00009056	0.00369839	0.00023310	0.00010314	0.00022429	0.00013317	0.00015425
198	NPL-KIOM-088	Rosaceae	Rubus	coreanus	Fruit	0.00002650	0.00002503	0.00001280	0.00001206	0.00001285	0.00001515	0.00000934	0.00002231	0.00002547	0.00000695	0.00001208	0.00001779	0.00002181	0.00001484	0.00001067	0.00001973	0.00001192	0.00003107	0.00001026	0.00000449	0.00000402	0.00000065	0.00003630	0.00000091	0.00000119	0.00000120	0.00000628	0.00000000	0.00001113	0.00000663	0.00001634	0.00000007	0.00000107	0.00000000	0.00000000	0.00000031	0.00000000	0.00000093	0.00054165	0.00042110	0.00000000	0.00001273	0.00002223	0.00000149
199	NPL-KIOM-089	Ranunculaceae	Aconitum	carmichaeli	Root	0.00000824	0.00000691	0.00001311	0.00000386	0.00000468	0.00000436	0.00000453	0.00000724	0.00001052	0.00000442	0.00000554	0.00000243	0.00001044	0.00003361	0.00000507	0.00004122	0.00020066	0.00021472	0.00001741	0.00000874	0.00000314	0.00006608	0.00000620	0.00000054	0.00000160	0.00000066	0.00000627	0.00000170	0.00006656	0.00005298	0.00000354	0.00000458	0.00003228	0.00000171	0.00004467	0.00001641	0.00001443	0.00004739	0.00193163	0.00014516	0.00013080	0.00003088	0.00002001	0.00000385
200	NPL-KIOM-090	Ranunculaceae	Aconitum	carmichaeli	Root	0.00006672	0.00006388	0.00008241	0.00005924	0.00005841	0.00005899	0.00006884	0.00004475	0.00009722	0.00005691	0.00004650	0.00001916	0.00005394	0.00005482	0.00005158	0.00005729	0.00005514	0.00004846	0.00003934	0.00005026	0.00003788	0.00002554	0.00004235	0.00002788	0.00003234	0.00005141	0.00002602	0.00004133	0.00002629	0.00003917	0.00003515	0.00002262	0.00001912	0.00002785	0.00000949	0.00002850	0.00003165	0.00002701	0.00004452	0.00306852	0.00004148	0.00010093	0.00006967	0.00002469
201	NPL-KIOM-091	Arecaceae	Areca	catechu	Seed	0.00003717	0.00001704	0.00003051	0.00002851	0.00001415	0.00002009	0.00002174	0.00002219	0.00002230	0.00002052	0.00001921	0.00001084	0.00001598	0.00002377	0.00000687	0.00000734	0.00000619	0.00000578	0.00000443	0.00000255	0.00000444	0.00000336	0.00019396	0.00000079	0.00000182	0.00000278	0.00000199	0.00000137	0.00008153	0.00008904	0.00016851	0.00000074	0.00000022	0.00000079	0.00000089	0.00000004	0.00000024	0.00000114	0.00118225	0.00000008	0.00000000	0.00000455	0.00000106	0.00000000
202	NPL-KIOM-092	Campanulaceae	Adenophora	triphylla	Root	0.00000847	0.00000678	0.00000907	0.00000836	0.00000637	0.00000801	0.00000912	0.00001626	0.00000864	0.00000743	0.00001002	0.00000971	0.00001134	0.00000987	0.00001073	0.00001180	0.00000923	0.00000909	0.00001183	0.00000853	0.00000808	0.00001767	0.00001153	0.00001381	0.00001027	0.00000924	0.00001672	0.00001129	0.00002007	0.00001061	0.00000926	0.00000477	0.00001341	0.00000599	0.00000961	0.00000632	0.00002369	0.00001097	0.00024785	0.00000830	0.00000598	0.00001034	0.00000565	0.00001126
203	NPL-KIOM-093	Apiaceae	Cnidium	monieri	Seed	0.00001304	0.00002088	0.00002418	0.00002330	0.00001175	0.00001369	0.00000834	0.00001243	0.00001098	0.00000755	0.00000683	0.00000816	0.00000978	0.00003365	0.00000116	0.00001720	0.00000969	0.00000443	0.00000356	0.00000513	0.00000379	0.00000282	0.00000383	0.00000118	0.00000192	0.00000480	0.00001851	0.00000065	0.00000312	0.00000209	0.00000060	0.00000461	0.00000128	0.00007158	0.00000244	0.00002144	0.00000071	0.00000322	0.00002173	0.00084171	0.00000204	0.00094423	0.00047414	0.00007137
204	NPL-KIOM-094	Apiaceae	Torilis	japonica	Seed	0.00002594	0.00003064	0.00002214	0.00000947	0.00002435	0.00001821	0.00001009	0.00002067	0.00002612	0.00001291	0.00000755	0.00001493	0.00001607	0.00001478	0.00004245	0.00002045	0.00001708	0.00001231	0.00001031	0.00000401	0.00000100	0.00000431	0.00000285	0.00000088	0.00000508	0.00000109	0.00002619	0.00000239	0.00000159	0.00000168	0.00000136	0.00000028	0.00000165	0.00000040	0.00000310	0.00001041	0.00000162	0.00000191	0.00100697	0.00000326	0.00000026	0.00000985	0.00000291	0.00000812
205	NPL-KIOM-095	Zingiberaceae	Amomum	villosum	Seed	0.00002502	0.00001584	0.00000614	0.00000668	0.00001693	0.00001088	0.00000981	0.00002045	0.00001206	0.00001380	0.00000597	0.00001311	0.00001114	0.00000100	0.00001505	0.00003273	0.00005032	0.00004414	0.00002123	0.00002266	0.00000572	0.00000691	0.00000641	0.00000112	0.00000524	0.00000066	0.00000658	0.00000376	0.00000256	0.00000292	0.00000135	0.00001008	0.00005857	0.00000074	0.00007712	0.00001922	0.00007027	0.00003174	0.00163567	0.00011543	0.00004282	0.00002548	0.00000009	0.00001435
206	NPL-KIOM-096	Zingiberaceae	Amomum	villosum	Seed	0.00002355	0.00001858	0.00001668	0.00000973	0.00001780	0.00001991	0.00002130	0.00002822	0.00001918	0.00001671	0.00000738	0.00001034	0.00001800	0.00001667	0.00001250	0.00001501	0.00002030	0.00002332	0.00001399	0.00001719	0.00001147	0.00000263	0.00000649	0.00000283	0.00000286	0.00000544	0.00002008	0.00000770	0.00000311	0.00000134	0.00000239	0.00000047	0.00000263	0.00000165	0.00000395	0.00000809	0.00005752	0.00005528	0.00200143	0.00025123	0.00000435	0.00004496	0.00000528	0.00001091
207	NPL-KIOM-097	Rosaceae	Crataegus	pinnatifida	Fruit	0.00001257	0.00001211	0.00001351	0.00001132	0.00000918	0.00001606	0.00001280	0.00002936	0.00001434	0.00000912	0.00001089	0.00000927	0.00003677	0.00002000	0.00000395	0.00000927	0.00000262	0.00000672	0.00000425	0.00000473	0.00000138	0.00000398	0.00002240	0.00000099	0.00000142	0.00000240	0.00000023	0.00000093	0.00000518	0.00001314	0.00000000	0.00000001	0.00000013	0.00000020	0.00000008	0.00000002	0.00000053	0.00000012	0.00000000	0.00043335	0.00001196	0.00000001	0.00000021	0.00000000
208	NPL-KIOM-098	Cornaceae	Cornus	officinalis	Fruit	0.00000997	0.00000757	0.00000881	0.00000785	0.00001078	0.00001092	0.00000831	0.00001287	0.00001309	0.00000908	0.00000454	0.00000840	0.00001148	0.00000839	0.00001060	0.00001062	0.00000898	0.00001345	0.00000498	0.00000716	0.00000569	0.00000477	0.00000783	0.00000469	0.00000360	0.00000345	0.00000607	0.00000368	0.00000290	0.00000386	0.00000237	0.00000402	0.00000589	0.00000383	0.00001683	0.00000298	0.00000237	0.00000277	0.00000083	0.00000144	0.00000156	0.00002548	0.00020822	0.00000415
209	NPL-KIOM-099	Dioscoreaceae	Dioscorea	batatas	Root	0.00000668	0.00000828	0.00001204	0.00000722	0.00000827	0.00000931	0.00000862	0.00001020	0.00000626	0.00000941	0.00000569	0.00001093	0.00001858	0.00000573	0.00001142	0.00002330	0.00002694	0.00003932	0.00001093	0.00000815	0.00000897	0.00015403	0.00000539	0.00001116	0.00000843	0.00000979	0.00003474	0.00004581	0.00023374	0.00008484	0.00000924	0.00003942	0.00004212	0.00000656	0.00005720	0.00002158	0.00008957	0.00001377	0.00070218	0.00000178	0.00000474	0.00013729	0.00000441	0.00000682
210	NPL-KIOM-100	Dioscoreaceae	Dioscorea	japonica	Root	0.00002265	0.00002420	0.00001592	0.00002321	0.00001926	0.00002072	0.00001535	0.00002779	0.00001765	0.00001385	0.00002197	0.00002723	0.00002687	0.00002973	0.00003385	0.00003149	0.00002149	0.00003183	0.00001915	0.00003198	0.00001904	0.00017024	0.00001797	0.00001955	0.00004258	0.00002691	0.00002177	0.00002323	0.00022934	0.00009132	0.00001298	0.00002475	0.00002559	0.00001708	0.00002257	0.00002845	0.00005020	0.00002029	0.00083241	0.00002279	0.00001941	0.00012954	0.00001332	0.00002925
211	NPL-KIOM-101	Rhamnaceae	Zizyphus	jujuba	Fruit, Root	0.00002216	0.00002175	0.00003060	0.00002276	0.00003158	0.00002406	0.00002908	0.00002971	0.00001973	0.00003086	0.00002927	0.00003729	0.00002800	0.00001653	0.00002972	0.00002456	0.00004259	0.00001648	0.00002094	0.00002665	0.00002707	0.00005822	0.00002006	0.00000932	0.00000856	0.00001314	0.00002052	0.00000908	0.00004099	0.00004894	0.00001079	0.00001031	0.00002064	0.00000482	0.00004467	0.00000873	0.00000372	0.00001235	0.00043501	0.00000735	0.00000560	0.00000312	0.00000349	0.00000568
212	NPL-KIOM-102	Rhamnaceae	Zizyphus	jujuba	Fruit, Root	0.00002472	0.00002016	0.00002072	0.00002534	0.00002285	0.00003016	0.00002730	0.00002507	0.00002573	0.00002033	0.00002170	0.00002934	0.00002359	0.00001988	0.00001967	0.00002868	0.00002985	0.00002614	0.00001891	0.00003871	0.00002048	0.00006087	0.00001569	0.00001028	0.00001128	0.00001439	0.00001794	0.00001336	0.00005540	0.00005856	0.00000772	0.00001005	0.00000768	0.00000523	0.00005057	0.00000880	0.00001585	0.00000764	0.00086027	0.00001579	0.00000808	0.00000568	0.00000636	0.00000601
213	NPL-KIOM-103	Rutaceae	Zanthoxylum	piperitum	Rind, Seed	0.00002431	0.00002424	0.00002583	0.00000952	0.00001074	0.00001841	0.00001840	0.00000973	0.00002421	0.00000580	0.00000595	0.00001178	0.00000573	0.00001890	0.00007884	0.00007797	0.00002616	0.00001109	0.00000793	0.00000383	0.00000457	0.00018690	0.00000484	0.00000068	0.00000421	0.00000181	0.00000564	0.00000167	0.00014838	0.00017137	0.00000044	0.00000015	0.00000113	0.00000011	0.00000474	0.00000009	0.00000187	0.00000263	0.00196869	0.00000169	0.00000034	0.00002856	0.00000246	0.00000032
214	NPL-KIOM-104	Rutaceae	Zanthoxylum	schinifolium	Rind, Seed	0.00003951	0.00004857	0.00003216	0.00001868	0.00002684	0.00002525	0.00002887	0.00002655	0.00002445	0.00003441	0.00002748	0.00005378	0.00003134	0.00003381	0.00001837	0.00002121	0.00001836	0.00003132	0.00000747	0.00000958	0.00000948	0.00020727	0.00001193	0.00001244	0.00001083	0.00001181	0.00000629	0.00001349	0.00026801	0.00012806	0.00000349	0.00000588	0.00000950	0.00000297	0.00000631	0.00000830	0.00000324	0.00000585	0.00233663	0.00001358	0.00081814	0.00002315	0.00001331	0.00026754
215	NPL-KIOM-105	Rutaceae	Zanthoxylum	bungeanum	Rind, Seed	0.00000396	0.00000150	0.00000213	0.00000382	0.00000166	0.00000042	0.00000028	0.00000258	0.00000109	0.00000019	0.00000060	0.00000088	0.00000243	0.00000229	0.00000694	0.00003061	0.00000426	0.00000399	0.00000000	0.00000000	0.00000000	0.00025967	0.00006974	0.00000000	0.00000000	0.00000000	0.00000000	0.00000000	0.00027877	0.00031876	0.00000000	0.00000000	0.00000000	0.00000000	0.00000000	0.00000026	0.00000000	0.00000000	0.00002044	0.00098511	0.00000000	0.00000286	0.00000367	0.00000013
216	NPL-KIOM-106	Sparganiaceae	Sparganium	stoloniferum	Root	0.00008542	0.00009985	0.00009483	0.00007119	0.00010854	0.00016358	0.00008886	0.00012216	0.00006380	0.00010036	0.00009944	0.00008837	0.00007268	0.00005605	0.00012023	0.00012026	0.00008037	0.00010303	0.00017692	0.00019287	0.00014703	0.00110471	0.00027862	0.00019862	0.00018660	0.00018540	0.00016696	0.00018729	0.00126762	0.00061100	0.00007767	0.00010225	0.00012184	0.00008939	0.00011832	0.00012155	0.00016411	0.00019485	0.00743720	0.00023603	0.00016392	0.00020422	0.00026598	0.00018300
217	NPL-KIOM-107	Moraceae	Morus	alba	Leaf, Fruit	0.00005014	0.00003445	0.00006727	0.00003027	0.00003189	0.00003276	0.00003495	0.00004595	0.00003716	0.00004485	0.00002657	0.00001890	0.00002831	0.00002297	0.00003097	0.00003169	0.00003083	0.00002302	0.00003447	0.00003335	0.00002385	0.00002418	0.00001293	0.00001236	0.00000708	0.00001494	0.00002169	0.00001423	0.00001227	0.00002052	0.00001301	0.00000922	0.00001525	0.00001402	0.00001479	0.00001199	0.00001025	0.00001073	0.00185508	0.00003660	0.00000314	0.00001537	0.00001889	0.00001374
218	NPL-KIOM-108	Moraceae	Morus	alba	Leaf, Fruit	0.00001264	0.00001538	0.00001183	0.00001000	0.00000901	0.00000848	0.00000585	0.00000509	0.00001294	0.00001029	0.00000888	0.00001549	0.00000519	0.00000946	0.00000729	0.00000666	0.00000547	0.00000625	0.00000348	0.00000200	0.00000372	0.00029620	0.00000741	0.00000089	0.00000115	0.00000231	0.00001518	0.00000073	0.00030539	0.00027538	0.00000062	0.00000000	0.00000442	0.00000084	0.00000180	0.00000159	0.00001432	0.00000025	0.00067791	0.00000149	0.00000005	0.00006212	0.00000339	0.00000480
219	NPL-KIOM-109	Moraceae	Morus	bombycis	Leaf, Root	0.00001246	0.00000154	0.00000470	0.00000569	0.00000423	0.00000418	0.00001154	0.00000505	0.00000408	0.00000684	0.00000400	0.00000395	0.00000356	0.00000783	0.00000882	0.00000383	0.00000570	0.00000264	0.00000164	0.00000165	0.00000255	0.00028352	0.00000030	0.00000016	0.00000007	0.00000149	0.00000615	0.00000160	0.00028662	0.00024470	0.00000031	0.00000004	0.00000101	0.00000000	0.00000189	0.00000045	0.00001048	0.00000262	0.00075516	0.00000000	0.00000000	0.00004409	0.00000198	0.00000396
220	NPL-KIOM-110	Moraceae	Morus	alba	Leaf, Fruit	0.00007665	0.00010194	0.00012638	0.00009486	0.00007984	0.00011240	0.00008402	0.00012686	0.00008499	0.00008134	0.00006309	0.00020607	0.00009579	0.00010778	0.00006913	0.00013067	0.00013229	0.00007366	0.00008616	0.00009351	0.00010329	0.00006381	0.00009886	0.00008077	0.00009975	0.00009674	0.00010523	0.00008086	0.00007636	0.00007611	0.00011076	0.00008721	0.00007546	0.00011231	0.00005560	0.00005840	0.00006907	0.00009095	0.00392992	0.00005716	0.00007116	0.00009186	0.00011658	0.00007861
221	NPL-KIOM-111	Orchidaceae	Dendrobium	fimbriatum	Whole plant	0.00002230	0.00002668	0.00001822	0.00001933	0.00001988	0.00002231	0.00002527	0.00007267	0.00002300	0.00001951	0.00003884	0.00003650	0.00002226	0.00002838	0.00001613	0.00002077	0.00003491	0.00004631	0.00001858	0.00001620	0.00001486	0.00006708	0.00001444	0.00019762	0.00000618	0.00001065	0.00001939	0.00019303	0.00001676	0.00001992	0.00001257	0.00002588	0.00001225	0.00001006	0.00002541	0.00002006	0.00002278	0.00000941	0.00303059	0.00002951	0.00022976	0.00001726	0.00002110	0.00001650
222	NPL-KIOM-112	Orchidaceae	Dendrobium	candidum	Whole plant	0.00016756	0.00011779	0.00008237	0.00009073	0.00011542	0.00011517	0.00006988	0.00012001	0.00010244	0.00008910	0.00009049	0.00009438	0.00012375	0.00017482	0.00006451	0.00015806	0.00012773	0.00009794	0.00005132	0.00008596	0.00009288	0.00012478	0.00009246	0.00004360	0.00004889	0.00007683	0.00007643	0.00005461	0.00007686	0.00006285	0.00005512	0.00004301	0.00005710	0.00005047	0.00005826	0.00003610	0.00003611	0.00003589	0.00386759	0.00005562	0.00006416	0.00017327	0.00003305	0.00004061
223	NPL-KIOM-113	Acoraceae	Acorus	gramineus	Root	0.00004254	0.00003028	0.00002636	0.00003201	0.00001934	0.00002993	0.00002668	0.00005181	0.00001747	0.00003862	0.00003415	0.00004242	0.00005657	0.00004735	0.00002114	0.00002051	0.00002354	0.00004997	0.00002342	0.00001213	0.00002068	0.00001891	0.00001521	0.00001600	0.00002130	0.00001961	0.00001876	0.00003041	0.00003549	0.00001892	0.00001681	0.00003919	0.00001117	0.00001141	0.00002351	0.00004225	0.00004135	0.00003677	0.00112251	0.00001284	0.00001357	0.00002394	0.00001448	0.00003260
224	NPL-KIOM-114	Hypoxidaceae	Curculigo	orchioides	Root	0.00002735	0.00002774	0.00003450	0.00003100	0.00004586	0.00002721	0.00002282	0.00009734	0.00003408	0.00003831	0.00004128	0.00003133	0.00003063	0.00013642	0.00002606	0.00002241	0.00003818	0.00002717	0.00002427	0.00001367	0.00001432	0.00001402	0.00001158	0.00000584	0.00000211	0.00000923	0.00000473	0.00000211	0.00000482	0.00000527	0.00000142	0.00000268	0.00000157	0.00000067	0.00000129	0.00000102	0.00000160	0.00000131	0.00077754	0.00003494	0.00000141	0.00000670	0.00000007	0.00000066
225	NPL-KIOM-115	Aristolochiaceae	Asiasarum	heterotropoides	Root	0.00001699	0.00001459	0.00001674	0.00002017	0.00002199	0.00003023	0.00002726	0.00003172	0.00001766	0.00001417	0.00001174	0.00003512	0.00003303	0.00003039	0.00003006	0.00003240	0.00002434	0.00002918	0.00001405	0.00000418	0.00000855	0.00004083	0.00000476	0.00000386	0.00000645	0.00000661	0.00001043	0.00000302	0.00003147	0.00001140	0.00000152	0.00000287	0.00000253	0.00000105	0.00000502	0.00000176	0.00000915	0.00000560	0.00096197	0.00000890	0.00000169	0.00003637	0.00000037	0.00000228
226	NPL-KIOM-116	Aristolochiaceae	Asiasarum	sieboldii	Root	0.00001023	0.00000503	0.00001342	0.00000946	0.00001491	0.00001493	0.00001224	0.00001060	0.00001355	0.00001214	0.00001229	0.00001675	0.00001274	0.00001458	0.00001507	0.00000816	0.00001105	0.00001834	0.00000747	0.00000494	0.00001082	0.00003905	0.00000492	0.00000117	0.00000347	0.00000530	0.00001619	0.00000110	0.00004124	0.00001118	0.00000461	0.00000096	0.00000285	0.00000141	0.00000246	0.00000606	0.00001084	0.00000317	0.00072327	0.00000026	0.00000000	0.00006546	0.00000540	0.00000547
227	NPL-KIOM-117	Fabaceae	Cassia	angustifolia	Leaf, Seed	0.00000597	0.00001185	0.00000859	0.00000871	0.00000759	0.00000643	0.00000800	0.00000866	0.00000468	0.00000425	0.00000434	0.00000272	0.00000323	0.00000401	0.00000243	0.00000102	0.00000272	0.00000274	0.00000226	0.00000026	0.00000034	0.00014587	0.00001596	0.00000000	0.00000000	0.00000052	0.00000030	0.00000000	0.00013688	0.00015704	0.00000004	0.00000000	0.00000000	0.00000000	0.00000000	0.00000005	0.00000000	0.00000448	0.00000021	0.00059334	0.00000000	0.00002090	0.00000805	0.00000000
228	NPL-KIOM-118	Fabaceae	Caesalpinia	sappan	Seed, 나무Rind	0.00006944	0.00007718	0.00005353	0.00004182	0.00008490	0.00006557	0.00004776	0.00008816	0.00018622	0.00004116	0.00004770	0.00016678	0.00007460	0.00008685	0.00004314	0.00006632	0.00005359	0.00005608	0.00005714	0.00003557	0.00002951	0.00002754	0.00002871	0.00002910	0.00001241	0.00002791	0.00003094	0.00001850	0.00001303	0.00002680	0.00003169	0.00000631	0.00003057	0.00000705	0.00001392	0.00001235	0.00001051	0.00003756	0.00299975	0.00002426	0.00001050	0.00002273	0.00000717	0.00001324
229	NPL-KIOM-119	Dipsacaceae	Dipsacus	asperoides	Root	0.00001468	0.00000650	0.00001063	0.00000605	0.00000634	0.00000689	0.00000506	0.00001011	0.00039344	0.00001108	0.00000514	0.00000580	0.00000718	0.00000607	0.00000388	0.00000588	0.00000698	0.00000862	0.00008041	0.00001306	0.00000475	0.00000770	0.00000763	0.00000603	0.00000410	0.00000101	0.00000454	0.00000970	0.00000487	0.00000016	0.00000112	0.00000240	0.00000559	0.00000237	0.00000863	0.00000590	0.00000056	0.00000500	0.00024715	0.00000406	0.00000004	0.00000409	0.00000013	0.00000000
230	NPL-KIOM-120	Ranunculaceae	Cimicifuga	heracleifolia	Root	0.00002145	0.00002604	0.00002047	0.00001907	0.00002116	0.00002342	0.00001983	0.00003061	0.00005787	0.00000613	0.00001543	0.00000958	0.00000836	0.00002868	0.00000507	0.00000537	0.00000780	0.00001041	0.00000141	0.00000249	0.00000407	0.00004289	0.00000288	0.00000227	0.00000077	0.00000123	0.00000248	0.00000012	0.00002035	0.00002183	0.00000007	0.00000236	0.00001606	0.00000006	0.00001798	0.00000069	0.00000010	0.00001519	0.00054102	0.00008795	0.00000000	0.00000000	0.00000000	0.00000000
231	NPL-KIOM-121	Ranunculaceae	Cimicifuga	dahurica	Root	0.00001603	0.00001634	0.00000840	0.00001771	0.00001755	0.00001060	0.00001525	0.00002375	0.00003821	0.00000742	0.00001186	0.00000986	0.00000721	0.00002254	0.00000646	0.00000285	0.00000382	0.00000440	0.00000224	0.00000501	0.00000075	0.00006271	0.00000191	0.00000167	0.00000027	0.00000050	0.00000038	0.00000014	0.00004040	0.00003745	0.00000016	0.00000192	0.00001718	0.00000000	0.00001574	0.00000018	0.00000178	0.00001732	0.00049890	0.00009646	0.00000000	0.00000000	0.00000000	0.00000080
232	NPL-KIOM-122	Apiaceae	Anethum	graveolens	Whole plant	0.00002917	0.00003834	0.00003675	0.00003536	0.00002393	0.00002981	0.00004705	0.00003301	0.00002057	0.00004436	0.00001804	0.00002677	0.00001806	0.00001577	0.00002219	0.00003573	0.00002934	0.00002653	0.00003377	0.00001944	0.00001663	0.00002265	0.00001919	0.00000658	0.00001843	0.00001185	0.00004264	0.00000755	0.00001206	0.00000628	0.00000434	0.00000563	0.00000050	0.00001462	0.00000667	0.00001225	0.00000286	0.00000921	0.00109396	0.00001426	0.00000652	0.00001061	0.00001128	0.00003315
233	NPL-KIOM-123	Ebenaceae	Diospyros	kaki	Fruit	0.00002772	0.00002965	0.00001648	0.00002328	0.00001267	0.00001330	0.00001385	0.00002957	0.00003563	0.00004981	0.00006060	0.00001999	0.00001612	0.00002671	0.00001403	0.00000426	0.00001027	0.00000912	0.00000600	0.00000102	0.00000905	0.00012026	0.00001726	0.00000675	0.00000185	0.00000269	0.00000843	0.00000228	0.00010325	0.00010088	0.00000067	0.00000048	0.00000395	0.00000087	0.00000009	0.00000015	0.00000231	0.00000000	0.00140334	0.00001105	0.00000088	0.00000908	0.00001494	0.00016209
234	NPL-KIOM-124	Apiaceae	Bupleurum	falcatum	Root	0.00001796	0.00001655	0.00001377	0.00001918	0.00001404	0.00001496	0.00001976	0.00003770	0.00002718	0.00001415	0.00001258	0.00002403	0.00003463	0.00002105	0.00000959	0.00001619	0.00003064	0.00001018	0.00004304	0.00002562	0.00001381	0.00000606	0.00001346	0.00000395	0.00001316	0.00000985	0.00004517	0.00001765	0.00000966	0.00000945	0.00000152	0.00000002	0.00000043	0.00000009	0.00000174	0.00000005	0.00000048	0.00000049	0.00077657	0.00003755	0.00000087	0.00001130	0.00000027	0.00000016
235	NPL-KIOM-125	Apiaceae	Bupleurum	scorzonerifolium	Root	0.00004182	0.00001907	0.00001610	0.00001635	0.00001061	0.00003657	0.00002988	0.00003774	0.00003679	0.00002171	0.00001763	0.00004462	0.00004420	0.00003101	0.00001615	0.00002245	0.00002849	0.00001397	0.00004434	0.00003425	0.00001782	0.00000906	0.00000706	0.00000661	0.00000529	0.00001015	0.00003831	0.00001372	0.00001124	0.00000375	0.00000180	0.00000011	0.00000105	0.00000179	0.00000015	0.00000283	0.00000017	0.00000086	0.00078975	0.00002674	0.00000239	0.00001248	0.00000123	0.00000047
236	NPL-KIOM-126	Apiaceae	Peucedanum	japonicum	Root	0.00001273	0.00001244	0.00001011	0.00001054	0.00000850	0.00000970	0.00001241	0.00001168	0.00000862	0.00001206	0.00000849	0.00001155	0.00000892	0.00000770	0.00000774	0.00000674	0.00003446	0.00001148	0.00000443	0.00000777	0.00000728	0.00000272	0.00002099	0.00000469	0.00002113	0.00000256	0.00000773	0.00000551	0.00000062	0.00000088	0.00000056	0.00000003	0.00000029	0.00000011	0.00000037	0.00000075	0.00001102	0.00000071	0.00020681	0.00000042	0.00000571	0.00005498	0.00000097	0.00000196
237	NPL-KIOM-127	Lycopodiaceae	Lycopodium	clavatum	Whole plant	0.00003341	0.00002221	0.00004171	0.00003690	0.00002328	0.00002792	0.00003853	0.00006529	0.00003494	0.00003312	0.00003429	0.00004398	0.00004701	0.00005315	0.00002592	0.00002792	0.00002489	0.00001525	0.00000924	0.00001036	0.00000754	0.00001003	0.00000547	0.00000856	0.00000274	0.00000765	0.00000833	0.00000454	0.00000508	0.00000473	0.00000279	0.00000479	0.00000222	0.00000499	0.00000408	0.00000212	0.00000000	0.00000025	0.00073105	0.00002698	0.00000127	0.00000013	0.00000072	0.00000104
238	NPL-KIOM-128	Zingiberaceae	Curcuma	kwangsiensis	Root	0.00002574	0.00004094	0.00002773	0.00003683	0.00003366	0.00004493	0.00005651	0.00002595	0.00002076	0.00002505	0.00002435	0.00000931	0.00001677	0.00003131	0.00002645	0.00001824	0.00004871	0.00002510	0.00001871	0.00001376	0.00000969	0.00001202	0.00003383	0.00001066	0.00002646	0.00000781	0.00001396	0.00000452	0.00000542	0.00000361	0.00000420	0.00000183	0.00000376	0.00000327	0.00000677	0.00000737	0.00000722	0.00000892	0.00095850	0.00001666	0.00000608	0.00001864	0.00000238	0.00000203
239	NPL-KIOM-129	Zingiberaceae	Curcuma	phaeocaulis	Root	0.00004766	0.00002988	0.00006018	0.00002720	0.00003232	0.00006965	0.00007675	0.00005393	0.00005747	0.00002199	0.00002812	0.00001588	0.00003459	0.00004949	0.00002463	0.00001867	0.00005157	0.00002866	0.00002066	0.00002473	0.00001271	0.00000867	0.00000998	0.00001643	0.00001860	0.00001953	0.00001449	0.00000540	0.00000820	0.00000965	0.00001299	0.00000866	0.00001266	0.00000896	0.00001027	0.00001754	0.00000974	0.00001030	0.00164699	0.00000454	0.00000445	0.00000611	0.00001553	0.00000970
240	NPL-KIOM-130	Zingiberaceae	Curcuma	wenyujin	Root	0.00003291	0.00003732	0.00007404	0.00004009	0.00002803	0.00003883	0.00002770	0.00002788	0.00003677	0.00002779	0.00002902	0.00002417	0.00002696	0.00004513	0.00003621	0.00002672	0.00001770	0.00003443	0.00001120	0.00000765	0.00000317	0.00000672	0.00000226	0.00000447	0.00000281	0.00000191	0.00000282	0.00000093	0.00000100	0.00000089	0.00000088	0.00000182	0.00000073	0.00000008	0.00000275	0.00000109	0.00000143	0.00000191	0.00117418	0.00000128	0.00000012	0.00000182	0.00000343	0.00000405
241	NPL-KIOM-131	Asteraceae	Artemisia	argyi	Leaf	0.00001298	0.00001366	0.00000765	0.00001336	0.00001510	0.00001315	0.00000350	0.00001600	0.00002381	0.00000925	0.00000924	0.00002608	0.00002681	0.00001333	0.00001903	0.00002670	0.00010007	0.00002047	0.00001000	0.00000776	0.00000419	0.00000290	0.00005344	0.00000340	0.00000158	0.00000442	0.00001514	0.00000217	0.00000150	0.00000144	0.00000171	0.00000126	0.00000004	0.00001001	0.00000334	0.00000221	0.00000174	0.00000125	0.00144966	0.00000391	0.00000016	0.00000047	0.00000423	0.00000641
242	NPL-KIOM-132	Asteraceae	Artemisia	princeps	Leaf	0.00000473	0.00000956	0.00001256	0.00000719	0.00001807	0.00000664	0.00000502	0.00001009	0.00002088	0.00000889	0.00001505	0.00000746	0.00001550	0.00000466	0.00000330	0.00001366	0.00001972	0.00000403	0.00000751	0.00000096	0.00000076	0.00000095	0.00000660	0.00000137	0.00000945	0.00000016	0.00000529	0.00000075	0.00000005	0.00000047	0.00000000	0.00000134	0.00000125	0.00000071	0.00000106	0.00000036	0.00000044	0.00000114	0.00108096	0.00000000	0.00000014	0.00000463	0.00000191	0.00000729
243	NPL-KIOM-133	Asteraceae	Artemisia	montana	Leaf	0.00000098	0.00000380	0.00000099	0.00000159	0.00000026	0.00000030	0.00000002	0.00000075	0.00000926	0.00000013	0.00000063	0.00000142	0.00000028	0.00000045	0.00000046	0.00000008	0.00000389	0.00000017	0.00000092	0.00000000	0.00000001	0.00000000	0.00000000	0.00000000	0.00000000	0.00000000	0.00000154	0.00000000	0.00000000	0.00000000	0.00000000	0.00000000	0.00000069	0.00000000	0.00000000	0.00000000	0.00000000	0.00000023	0.00075167	0.00000000	0.00000000	0.00001572	0.00000166	0.00000140
244	NPL-KIOM-134	Saururaceae	Houttuynia	cordata	Whole plant	0.00002543	0.00003258	0.00002369	0.00001369	0.00001323	0.00003056	0.00002164	0.00002392	0.00002558	0.00001169	0.00001598	0.00002550	0.00003590	0.00005246	0.00002326	0.00001836	0.00002489	0.00002103	0.00001168	0.00000783	0.00000813	0.00004932	0.00016672	0.00000419	0.00000603	0.00000199	0.00002056	0.00000205	0.00010401	0.00025482	0.00000110	0.00000038	0.00000118	0.00000012	0.00000134	0.00000593	0.00000377	0.00000214	0.00000744	0.00214823	0.00001684	0.00004666	0.00003393	0.00000162
245	NPL-KIOM-135	Oleaceae	Ligustrum	lucidum	Fruit, Leaf	0.00000801	0.00000766	0.00000466	0.00001012	0.00000926	0.00000493	0.00000487	0.00000407	0.00002004	0.00000737	0.00000866	0.00006011	0.00000750	0.00001300	0.00000269	0.00000408	0.00000559	0.00000166	0.00000159	0.00000337	0.00000076	0.00000311	0.00000938	0.00000477	0.00000061	0.00000019	0.00000139	0.00000025	0.00000097	0.00000150	0.00000098	0.00000201	0.00000272	0.00000020	0.00000297	0.00000261	0.00000427	0.00000059	0.00063293	0.00000027	0.00000000	0.00000082	0.00000103	0.00000000
246	NPL-KIOM-136	Oleaceae	Ligustrum	japoricum	Fruit, Leaf	0.00001323	0.00000246	0.00000081	0.00000031	0.00000043	0.00000048	0.00000016	0.00000059	0.00000476	0.00001013	0.00001471	0.00000726	0.00000764	0.00000516	0.00000175	0.00000083	0.00000052	0.00000474	0.00013016	0.00047866	0.00000608	0.00000408	0.00000798	0.00001105	0.00000408	0.00000060	0.00000309	0.00000249	0.00000257	0.00004138	0.00000525	0.00002204	0.00002502	0.00002678	0.00004470	0.00002127	0.00000065	0.00000119	0.00001923	0.00048834	0.00000000	0.00000000	0.00000000	0.00000000
247	NPL-KIOM-137	Oleaceae	Forsythia	viridissima	Fruit, Leaf	0.00002107	0.00002339	0.00003525	0.00003899	0.00003577	0.00001869	0.00002760	0.00004439	0.00001748	0.00001167	0.00001447	0.00002293	0.00001833	0.00001505	0.00002068	0.00002413	0.00001940	0.00001715	0.00000755	0.00000783	0.00001824	0.00000380	0.00000188	0.00000166	0.00000055	0.00000187	0.00000316	0.00000227	0.00003031	0.00000392	0.00000152	0.00000001	0.00002732	0.00000669	0.00002742	0.00001536	0.00000045	0.00000096	0.00081696	0.00001140	0.00000132	0.00000640	0.00000007	0.00000000
248	NPL-KIOM-138	Oleaceae	Forsythia	suspensa	Fruit, Leaf	0.00002089	0.00001709	0.00001136	0.00007972	0.00000695	0.00001180	0.00001799	0.00002244	0.00006022	0.00000598	0.00000726	0.00000227	0.00000704	0.00001035	0.00000414	0.00001256	0.00001145	0.00001620	0.00000257	0.00000221	0.00000045	0.00000009	0.00000065	0.00000046	0.00000026	0.00000012	0.00000000	0.00000005	0.00000010	0.00000015	0.00000000	0.00000038	0.00000140	0.00000003	0.00000320	0.00000012	0.00000710	0.00000055	0.00081266	0.00000057	0.00000002	0.00000401	0.00000006	0.00000000
249	NPL-KIOM-139	Nelumbonaceae	Nelumbo	nucifera	Seed, Root	0.00001719	0.00001438	0.00001035	0.00002056	0.00001728	0.00002230	0.00000966	0.00002265	0.00001903	0.00001466	0.00001097	0.00001732	0.00001044	0.00001757	0.00001612	0.00001467	0.00000932	0.00001105	0.00002396	0.00001284	0.00001606	0.00038070	0.00001019	0.00001551	0.00001018	0.00001601	0.00003018	0.00002198	0.00043323	0.00033357	0.00000889	0.00000911	0.00001933	0.00001811	0.00001095	0.00001521	0.00005253	0.00002129	0.00077929	0.00002246	0.00001436	0.00004212	0.00002244	0.00002039
250	NPL-KIOM-140	Araliaceae	Acanthopanax	sessiliflorum	Root	0.00001812	0.00001381	0.00001939	0.00003867	0.00001831	0.00002024	0.00003852	0.00007202	0.00008913	0.00001029	0.00001967	0.00004182	0.00003275	0.00001538	0.00006212	0.00005778	0.00002349	0.00000977	0.00001595	0.00000705	0.00000444	0.00000696	0.00000860	0.00000174	0.00000742	0.00000633	0.00000563	0.00000308	0.00000270	0.00000254	0.00000110	0.00000268	0.00000141	0.00000072	0.00001076	0.00000092	0.00000048	0.00000763	0.00390065	0.00022644	0.00001161	0.00003134	0.00000550	0.00000210
251	NPL-KIOM-141	Scolopendridae	Scolopendra	subspinipes	Whole plant	0.00000091	0.00000121	0.00000063	0.00000168	0.00000157	0.00000074	0.00000205	0.00000207	0.00000141	0.00000052	0.00000003	0.00000163	0.00000073	0.00000011	0.00000086	0.00000335	0.00000018	0.00000057	0.00000110	0.00000050	0.00000217	0.00000254	0.00000192	0.00000243	0.00000205	0.00000459	0.00013290	0.00000169	0.00000747	0.00000523	0.00002820	0.00003812	0.00010576	0.00004857	0.00007514	0.00076664	0.00058888	0.00062160	0.00066568	0.00007519	0.00011386	0.00059876	0.00023071	0.00034860
252	NPL-KIOM-142	Schisandraceae	Schisandra	chinensis	Fruit	0.00000554	0.00000757	0.00000479	0.00000752	0.00001010	0.00000564	0.00000348	0.00000717	0.00000795	0.00000795	0.00002054	0.00001212	0.00097050	0.00283378	0.00006311	0.00000844	0.00005384	0.00004926	0.00001349	0.00013224	0.00000023	0.00005923	0.00001636	0.00000009	0.00000025	0.00000001	0.00000062	0.00000001	0.00003426	0.00009188	0.00000000	0.00000009	0.00000054	0.00000175	0.00000010	0.00000000	0.00000000	0.00000000	0.00000000	0.00000000	0.00000000	0.00000094	0.00079310	0.00014450
253	NPL-KIOM-143	Rutaceae	Evodia	rutaecarpa	Fruit, Seed	0.00000010	0.00000005	0.00000000	0.00000001	0.00000004	0.00000000	0.00000000	0.00000015	0.00000179	0.00000000	0.00000000	0.00000000	0.00000000	0.00000000	0.00000000	0.00000000	0.00000000	0.00000000	0.00000000	0.00000000	0.00000000	0.00002141	0.00019074	0.00000000	0.00001554	0.00000000	0.00000000	0.00000000	0.00010244	0.00024843	0.00000000	0.00000000	0.00000000	0.00000000	0.00000000	0.00000000	0.00000000	0.00000000	0.00036483	0.00049708	0.00002910	0.00101450	0.00000916	0.00031078
254	NPL-KIOM-144	Lauraceae	Lindera	strichnifolia	Whole plant	0.00003213	0.00003143	0.00005467	0.00004405	0.00002529	0.00003471	0.00004445	0.00004687	0.00003560	0.00003953	0.00005055	0.00002322	0.00004901	0.00003956	0.00002965	0.00002377	0.00010838	0.00001970	0.00001502	0.00000908	0.00000754	0.00001286	0.00007478	0.00000170	0.00005421	0.00001036	0.00000620	0.00000262	0.00000626	0.00000805	0.00000002	0.00000103	0.00000074	0.00000236	0.00000115	0.00000105	0.00000000	0.00000051	0.00116533	0.00000758	0.00000037	0.00000864	0.00000111	0.00000000
255	NPL-KIOM-145	Convallariaceae	Polygonatum	odoratum	Root	0.00000965	0.00000677	0.00000742	0.00001341	0.00000862	0.00000863	0.00001018	0.00000975	0.00000917	0.00000770	0.00001042	0.00000984	0.00000622	0.00000941	0.00001268	0.00000959	0.00001372	0.00001210	0.00001570	0.00000596	0.00000764	0.00002379	0.00000570	0.00000824	0.00000995	0.00000913	0.00000842	0.00000820	0.00002185	0.00001195	0.00000653	0.00000467	0.00000742	0.00000469	0.00000504	0.00000788	0.00001052	0.00000853	0.00019173	0.00000261	0.00000600	0.00003002	0.00000538	0.00000285
256	NPL-KIOM-146	Gentianaceae	Gentiana	manshurica	Root	0.00000183	0.00000556	0.00000163	0.00000063	0.00000170	0.00000460	0.00000095	0.00000073	0.00000025	0.00000031	0.00000005	0.00000118	0.00000030	0.00000074	0.00000231	0.00001891	0.00000368	0.00000057	0.00000009	0.00000004	0.00000072	0.00000065	0.00000036	0.00001102	0.00000034	0.00000251	0.00000041	0.00000357	0.00000403	0.00001274	0.00003710	0.00003768	0.00002272	0.00000282	0.00000289	0.00000000	0.00000000	0.00000000	0.00123207	0.00003354	0.00000000	0.00000379	0.00000143	0.00000000
257	NPL-KIOM-147	Gentianaceae	Gentiana	scabra	Root	0.00000348	0.00000204	0.00000128	0.00000151	0.00000148	0.00000440	0.00000018	0.00000638	0.00000390	0.00000155	0.00000105	0.00000310	0.00000170	0.00000160	0.00000652	0.00003618	0.00001996	0.00000414	0.00000134	0.00000158	0.00000813	0.00000220	0.00000247	0.00003002	0.00001153	0.00001290	0.00001524	0.00002659	0.00002575	0.00003279	0.00008755	0.00005849	0.00005239	0.00001635	0.00000656	0.00000186	0.00000823	0.00000348	0.00068545	0.00000000	0.00000029	0.00001012	0.00000080	0.00000005
258	NPL-KIOM-148	Sapindaceae	Dimocarpus	longan	Fruit	0.00000807	0.00000899	0.00000940	0.00001148	0.00001123	0.00000868	0.00001384	0.00001335	0.00001506	0.00001337	0.00000950	0.00000801	0.00000885	0.00001072	0.00001131	0.00001467	0.00001588	0.00003484	0.00001055	0.00000695	0.00001057	0.00002128	0.00000961	0.00000687	0.00000805	0.00000758	0.00002089	0.00001273	0.00002548	0.00001977	0.00001136	0.00000578	0.00000962	0.00000440	0.00000981	0.00000671	0.00001143	0.00000691	0.00051729	0.00000972	0.00000702	0.00000662	0.00000770	0.00000967
259	NPL-KIOM-149	Asteraceae	Arctium	lappa	Root	0.00003101	0.00001759	0.00003373	0.00002035	0.00003313	0.00003019	0.00004170	0.00004139	0.00002901	0.00002082	0.00002571	0.00003635	0.00001920	0.00001947	0.00001748	0.00001944	0.00002456	0.00003096	0.00001799	0.00001351	0.00000662	0.00026889	0.00002119	0.00001521	0.00001143	0.00000954	0.00000668	0.00000059	0.00034662	0.00020506	0.00000906	0.00000683	0.00000496	0.00000245	0.00000381	0.00000151	0.00000236	0.00000225	0.00071066	0.00001720	0.00000382	0.00000182	0.00000100	0.00000028
260	NPL-KIOM-150	Amaranthaceae	Achyranthes	japonica	Root	0.00002106	0.00002852	0.00001922	0.00002113	0.00001823	0.00002441	0.00002750	0.00002681	0.00002202	0.00002466	0.00002393	0.00001845	0.00001576	0.00002114	0.00002006	0.00002229	0.00002751	0.00001970	0.00002270	0.00001565	0.00001869	0.00001955	0.00002187	0.00002164	0.00001855	0.00001143	0.00001791	0.00001008	0.00001218	0.00001200	0.00000816	0.00000790	0.00000526	0.00000273	0.00000597	0.00000683	0.00000206	0.00000206	0.00046012	0.00000140	0.00000484	0.00000243	0.00000199	0.00000319
261	NPL-KIOM-151	Zingiberaceae	Curcuma	wenyujin	Root, RootStem	0.00003895	0.00004444	0.00006589	0.00005617	0.00004865	0.00004711	0.00004635	0.00008866	0.00003177	0.00006043	0.00004412	0.00004981	0.00004718	0.00020444	0.00003275	0.00003618	0.00004595	0.00005710	0.00002345	0.00002952	0.00003155	0.00002077	0.00003528	0.00002478	0.00002250	0.00001251	0.00002359	0.00000621	0.00001182	0.00001586	0.00001739	0.00001223	0.00001555	0.00001758	0.00003180	0.00001509	0.00000270	0.00000300	0.00393091	0.00005163	0.00004859	0.00003213	0.00003493	0.00000949
262	NPL-KIOM-152	Polygalaceae	Polygala	tenuifolia	Root	0.00000476	0.00000071	0.00000100	0.00000051	0.00000110	0.00000099	0.00000093	0.00000340	0.00000702	0.00000003	0.00000067	0.00000004	0.00000000	0.00000051	0.00000000	0.00000033	0.00000316	0.00000098	0.00000000	0.00000000	0.00000000	0.00001026	0.00000000	0.00000000	0.00000000	0.00000000	0.00000000	0.00000000	0.00000181	0.00000338	0.00000000	0.00000000	0.00000000	0.00000000	0.00000000	0.00000000	0.00000000	0.00000000	0.00032281	0.00000000	0.00000000	0.00000090	0.00000000	0.00047851
263	NPL-KIOM-153	Ranunculaceae	Clematis	manshurica	Root	0.00000535	0.00000625	0.00000934	0.00000604	0.00000917	0.00000758	0.00000754	0.00000512	0.00000676	0.00000474	0.00000680	0.00000364	0.00000274	0.00000490	0.00000415	0.00000322	0.00001213	0.00001425	0.00000282	0.00000259	0.00000107	0.00003340	0.00000127	0.00000081	0.00000045	0.00000209	0.00000190	0.00000079	0.00002455	0.00001941	0.00000123	0.00000015	0.00000165	0.00000002	0.00000008	0.00000058	0.00000027	0.00000035	0.00048490	0.00002748	0.00000000	0.00000000	0.00000023	0.00000000
264	NPL-KIOM-154	Ranunculaceae	Clematis	chinensis	Root	0.00003551	0.00002693	0.00002307	0.00002070	0.00002122	0.00001555	0.00001753	0.00002219	0.00002408	0.00001728	0.00001735	0.00001220	0.00002415	0.00001416	0.00003928	0.00002284	0.00001707	0.00003583	0.00000891	0.00000511	0.00000282	0.00000249	0.00000231	0.00000397	0.00000126	0.00000268	0.00000191	0.00000031	0.00000176	0.00000148	0.00000024	0.00000000	0.00000000	0.00000000	0.00000000	0.00000011	0.00000000	0.00000000	0.00000000	0.00081842	0.00000000	0.00000057	0.00000000	0.00000024
265	NPL-KIOM-155	Ulmaceae	Ulmus	macrocarpa	Rind	0.00005797	0.00004402	0.00005877	0.00006549	0.00004492	0.00003171	0.00005143	0.00005553	0.00006641	0.00018147	0.00006317	0.00007209	0.00003806	0.00006131	0.00005810	0.00005331	0.00005815	0.00004245	0.00003306	0.00005245	0.00003640	0.00003814	0.00001821	0.00001749	0.00001865	0.00001804	0.00001416	0.00001125	0.00002147	0.00001697	0.00001203	0.00001259	0.00001604	0.00002376	0.00001144	0.00000934	0.00001385	0.00001357	0.00230840	0.00002031	0.00001682	0.00003206	0.00001790	0.00000576
266	NPL-KIOM-156	Lauraceae	Cinnamomum	cassia	Rind	0.00001607	0.00010156	0.00002966	0.00001990	0.00004101	0.00001580	0.00027384	0.00008144	0.00004603	0.02804941	0.02847974	0.00225017	0.00002693	0.00024488	0.00000000	0.00000000	0.00000000	0.00000000	0.00000037	0.00000000	0.00000000	0.00000000	0.00000000	0.00000000	0.00000000	0.00000000	0.00000000	0.00000000	0.00000000	0.00000000	0.00000000	0.00000000	0.00000000	0.00000000	0.00000000	0.00000000	0.00000000	0.00000000	0.00187119	0.00000000	0.00000000	0.00000000	0.00000000	0.00000000
267	NPL-KIOM-157	Orobanchaceae	Cistanche	deserticola	Whole plant	0.00000184	0.00000338	0.00000192	0.00000318	0.00000201	0.00000163	0.00000199	0.00002033	0.00000216	0.00003493	0.00003472	0.00000665	0.00001750	0.00004949	0.00000155	0.00000148	0.00000059	0.00000172	0.00000044	0.00000000	0.00000004	0.00006938	0.00000000	0.00000086	0.00000039	0.00000044	0.00000005	0.00000000	0.00008826	0.00004163	0.00000000	0.00000017	0.00000076	0.00000003	0.00000651	0.00001349	0.00000039	0.00000213	0.00035192	0.00000000	0.00000000	0.00001421	0.00000013	0.00000000
268	NPL-KIOM-158	Ginkgoaceae	Ginkgo	biloba	Leaf	0.00001657	0.00000913	0.00001299	0.00001471	0.00001682	0.00001197	0.00001455	0.00001665	0.00000988	0.00000739	0.00000512	0.00000860	0.00000687	0.00001350	0.00000803	0.00001018	0.00000970	0.00000915	0.00001344	0.00000855	0.00000570	0.00001655	0.00005393	0.00000126	0.00000043	0.00000059	0.00000779	0.00000249	0.00003107	0.00007106	0.00000024	0.00000076	0.00000547	0.00000132	0.00000019	0.00000230	0.00000144	0.00005178	0.00000784	0.00064192	0.00000038	0.00000145	0.00000375	0.00000287
269	NPL-KIOM-159	Berberidaceae	Epimedium	koreanum	Whole plant	0.00002925	0.00001280	0.00000869	0.00001141	0.00001442	0.00002016	0.00002178	0.00001775	0.00001524	0.00000907	0.00000587	0.00000555	0.00001318	0.00000443	0.00000780	0.00001818	0.00001231	0.00001093	0.00000921	0.00000242	0.00000127	0.00003520	0.00000095	0.00000080	0.00000116	0.00000000	0.00000216	0.00000125	0.00002036	0.00001378	0.00000009	0.00000004	0.00000003	0.00000000	0.00000000	0.00000005	0.00000000	0.00000011	0.00092833	0.00005193	0.00000000	0.00000000	0.00000000	0.00000000
270	NPL-KIOM-160	Berberidaceae	Epimedium	sagittatum	Whole plant	0.00000572	0.00001332	0.00001293	0.00001466	0.00001799	0.00001178	0.00000971	0.00001563	0.00001109	0.00000480	0.00000735	0.00000477	0.00000802	0.00001727	0.00001194	0.00000525	0.00000367	0.00001186	0.00000350	0.00000100	0.00000255	0.00010689	0.00000243	0.00000012	0.00000077	0.00000122	0.00000093	0.00000093	0.00007730	0.00007016	0.00000000	0.00000000	0.00000000	0.00000000	0.00000000	0.00000000	0.00000000	0.00000000	0.00092597	0.00001547	0.00000000	0.00000000	0.00000000	0.00000000
271	NPL-KIOM-161	Berberidaceae	Epimedium	brevicornum	Whole plant	0.00001096	0.00000920	0.00000903	0.00001232	0.00002256	0.00001717	0.00002049	0.00002183	0.00001598	0.00000648	0.00001172	0.00000568	0.00000657	0.00000423	0.00000611	0.00000562	0.00000392	0.00000224	0.00000147	0.00000068	0.00000000	0.00002028	0.00000074	0.00000003	0.00000013	0.00000000	0.00000000	0.00000003	0.00000568	0.00000659	0.00000007	0.00000002	0.00000000	0.00000000	0.00000000	0.00000000	0.00000000	0.00000000	0.00055094	0.00013228	0.00000000	0.00000000	0.00000000	0.00000000
272	NPL-KIOM-162	Poaceae	Coix	lacryma-jovi	Seed	0.00008671	0.00007636	0.00012649	0.00008442	0.00008211	0.00011519	0.00012559	0.00007288	0.00013965	0.00010424	0.00009655	0.00013482	0.00006978	0.00009299	0.00005756	0.00010378	0.00008745	0.00008549	0.00009968	0.00009448	0.00008824	0.00009007	0.00006713	0.00008805	0.00012034	0.00009391	0.00009383	0.00009668	0.00010376	0.00008304	0.00006060	0.00007338	0.00009101	0.00005228	0.00010447	0.00006766	0.00006477	0.00007480	0.00234011	0.00010257	0.00008054	0.00009234	0.00005580	0.00007068
273	NPL-KIOM-163	Lamiaceae	Leonurus	japonicus	Whole plant	0.00000864	0.00000739	0.00000607	0.00000480	0.00000630	0.00000480	0.00001302	0.00001484	0.00000532	0.00000242	0.00000442	0.00001619	0.00000628	0.00000479	0.00000447	0.00001193	0.00000587	0.00001098	0.00000052	0.00000310	0.00000227	0.00087979	0.00000033	0.00000070	0.00000147	0.00000213	0.00001937	0.00001746	0.00122683	0.00049388	0.00000000	0.00000146	0.00000536	0.00000076	0.00000398	0.00000534	0.00000598	0.00000342	0.00100736	0.00000000	0.00000021	0.00008339	0.00000231	0.00001048
274	NPL-KIOM-164	Zingiberaceae	Alpinia	oxyphylla	Root	0.00003034	0.00002424	0.00005053	0.00003069	0.00004477	0.00002605	0.00001911	0.00003201	0.00002364	0.00001316	0.00000954	0.00001106	0.00001742	0.00006405	0.00002269	0.00001532	0.00006084	0.00003035	0.00002303	0.00000466	0.00000681	0.00000435	0.00000356	0.00000091	0.00000250	0.00000137	0.00000109	0.00000096	0.00000101	0.00000211	0.00000000	0.00000006	0.00000010	0.00000000	0.00000000	0.00000075	0.00000010	0.00000089	0.00136483	0.00023090	0.00000157	0.00000090	0.00000043	0.00000057
275	NPL-KIOM-165	Caprifoliaceae	Lonicera	japonica	Flower, Leaf	0.00002422	0.00003450	0.00002719	0.00002271	0.00002666	0.00002180	0.00002355	0.00003947	0.00015456	0.00006744	0.00003646	0.00006085	0.00002815	0.00001842	0.00001898	0.00002068	0.00002182	0.00001144	0.00002387	0.00002933	0.00003375	0.00000436	0.00000445	0.00000988	0.00000406	0.00000160	0.00000727	0.00000717	0.00000815	0.00000687	0.00000497	0.00000419	0.00000196	0.00000202	0.00000580	0.00000286	0.00000013	0.00000797	0.00073916	0.00001178	0.00000012	0.00000081	0.00000004	0.00000000
276	NPL-KIOM-166	Araliaceae	Panax	ginseng	Root	0.00001172	0.00000904	0.00001151	0.00001020	0.00000796	0.00000850	0.00001461	0.00001068	0.00001091	0.00000923	0.00001305	0.00000840	0.00000945	0.00001150	0.00001033	0.00001417	0.00001795	0.00002304	0.00001109	0.00000930	0.00000829	0.00000753	0.00001343	0.00000670	0.00000666	0.00000934	0.00001969	0.00000262	0.00000330	0.00000361	0.00000431	0.00000438	0.00001089	0.00000148	0.00000259	0.00000340	0.00000106	0.00000436	0.00032909	0.00000469	0.00000350	0.00009087	0.00000736	0.00000900
277	NPL-KIOM-167	Asteraceae	Artemisia	capillaris	Leaf	0.00002093	0.00003991	0.00002926	0.00001266	0.00002390	0.00002191	0.00001975	0.00002811	0.00003317	0.00001551	0.00000468	0.00000872	0.00001912	0.00002462	0.00000626	0.00001575	0.00008463	0.00006195	0.00000576	0.00000137	0.00000216	0.00000449	0.00000008	0.00000001	0.00000023	0.00000000	0.00000008	0.00000000	0.00000000	0.00000000	0.00000000	0.00000000	0.00000000	0.00000000	0.00000115	0.00000000	0.00000000	0.00000000	0.00092932	0.00000030	0.00000000	0.00000231	0.00000000	0.00000000
278	NPL-KIOM-168	Apiaceae	Angelica	acutiloba	Root	0.00000368	0.00000180	0.00000541	0.00000256	0.00000547	0.00000305	0.00000546	0.00000713	0.00000294	0.00000242	0.00000153	0.00000302	0.00000502	0.00000210	0.00000177	0.00000373	0.00000591	0.00000318	0.00000232	0.00000180	0.00000041	0.00000144	0.00000195	0.00000176	0.00000117	0.00000105	0.00000476	0.00000087	0.00000043	0.00000031	0.00000080	0.00000164	0.00000030	0.00000087	0.00000197	0.00000283	0.00000057	0.00000095	0.00032179	0.00000037	0.00000222	0.00006374	0.00000417	0.00000530
279	NPL-KIOM-169	Apiaceae	Angelica	acutiloba	Root	0.00000736	0.00000590	0.00000824	0.00000534	0.00000586	0.00000997	0.00000916	0.00000865	0.00000523	0.00000652	0.00000348	0.00000907	0.00000789	0.00000602	0.00000745	0.00000457	0.00001301	0.00000500	0.00000605	0.00000649	0.00000370	0.00000513	0.00001021	0.00000412	0.00000513	0.00000324	0.00000847	0.00000331	0.00000268	0.00000295	0.00000335	0.00000152	0.00000520	0.00000161	0.00000310	0.00000297	0.00000258	0.00000185	0.00019852	0.00000146	0.00000418	0.00001204	0.00000110	0.00000441
280	NPL-KIOM-170	Boraginaceae	Lithospermum	erythrorhizon	Root	0.00000709	0.00000674	0.00000687	0.00000652	0.00000723	0.00000727	0.00000374	0.00000615	0.00000624	0.00000428	0.00000661	0.00000436	0.00000622	0.00000677	0.00000706	0.00000646	0.00000821	0.00000547	0.00000442	0.00000391	0.00000355	0.00000288	0.00000707	0.00000309	0.00000536	0.00000242	0.00000565	0.00000141	0.00000260	0.00000169	0.00000307	0.00000121	0.00000136	0.00000209	0.00000252	0.00000100	0.00000481	0.00000235	0.00021643	0.00000159	0.00000036	0.00000389	0.00000263	0.00000113
281	NPL-KIOM-171	Boraginaceae	Arnebia	euchroma	Root	0.00006086	0.00006253	0.00009443	0.00009460	0.00009218	0.00002501	0.00009164	0.00006211	0.00027281	0.00006037	0.00008118	0.00006508	0.00014903	0.00005570	0.00004822	0.00004662	0.00005952	0.00004933	0.00007025	0.00003939	0.00003905	0.00003747	0.00003748	0.00003003	0.00004393	0.00002764	0.00002991	0.00001350	0.00002279	0.00000839	0.00002452	0.00002268	0.00002818	0.00003286	0.00001883	0.00005451	0.00000969	0.00005625	0.00005004	0.00512570	0.00006292	0.00011049	0.00006932	0.00013947
282	NPL-KIOM-172	Boraginaceae	Arnebia	guttata	Root	0.00007717	0.00010691	0.00013844	0.00009124	0.00006473	0.00013424	0.00007873	0.00011490	0.00012044	0.00015056	0.00010666	0.00011877	0.00014869	0.00009935	0.00006686	0.00006462	0.00011160	0.00008044	0.00005309	0.00003957	0.00010806	0.00007768	0.00007291	0.00006094	0.00010021	0.00004752	0.00004840	0.00001599	0.00007026	0.00010464	0.00005193	0.00004647	0.00006009	0.00009807	0.00010554	0.00008916	0.00009895	0.00006403	0.00005186	0.00540142	0.00005271	0.00006479	0.00007506	0.00009717
283	NPL-KIOM-173	Lamiaceae	Perilla	frutescens	Leaf	0.00001923	0.00001740	0.00000957	0.00000605	0.00000952	0.00001072	0.00000660	0.00001448	0.00001694	0.00004978	0.00005316	0.00002151	0.00003661	0.00011177	0.00000823	0.00001041	0.00006413	0.00001240	0.00000120	0.00000164	0.00000179	0.00000246	0.00000818	0.00000049	0.00000268	0.00000070	0.00000630	0.00000000	0.00000133	0.00000012	0.00000000	0.00000106	0.00000007	0.00000000	0.00000014	0.00000139	0.00000314	0.00000000	0.00125891	0.00000344	0.00006185	0.00004011	0.00000064	0.00000629
284	NPL-KIOM-174	Lamiaceae	Perilla	frutescens	Leaf	0.00001537	0.00002443	0.00002318	0.00001890	0.00002502	0.00002322	0.00002540	0.00003260	0.00005026	0.00001769	0.00001915	0.00003403	0.00003233	0.00002847	0.00003637	0.00004119	0.00021228	0.00001887	0.00000918	0.00001098	0.00000839	0.00000362	0.00000635	0.00000686	0.00000956	0.00000588	0.00001051	0.00000168	0.00000201	0.00000764	0.00000371	0.00000255	0.00000525	0.00000342	0.00000363	0.00000193	0.00001374	0.00000157	0.00188587	0.00000610	0.00000131	0.00012332	0.00000744	0.00000810
285	NPL-KIOM-175	Lamiaceae	Perilla	frutescens	Leaf	0.00002560	0.00003294	0.00002968	0.00003816	0.00003538	0.00003105	0.00004522	0.00006800	0.00006354	0.00003633	0.00003008	0.00003807	0.00002201	0.00002931	0.00002231	0.00003933	0.00011193	0.00001056	0.00001447	0.00001813	0.00002113	0.00001406	0.00009984	0.00002316	0.00005356	0.00001779	0.00005432	0.00001313	0.00000694	0.00000867	0.00001449	0.00001840	0.00001429	0.00001773	0.00001662	0.00003871	0.00001635	0.00001627	0.00304130	0.00000659	0.00003689	0.00023963	0.00004080	0.00003169
286	NPL-KIOM-176	Lamiaceae	Perilla	frutescens	Leaf	0.00007310	0.00005472	0.00006615	0.00005314	0.00008952	0.00008976	0.00009712	0.00009420	0.00008394	0.00007225	0.00007231	0.00008493	0.00005296	0.00006004	0.00007113	0.00006436	0.00022966	0.00005969	0.00006028	0.00006565	0.00004210	0.00004301	0.00017081	0.00004840	0.00017337	0.00006284	0.00007966	0.00004433	0.00004785	0.00001939	0.00005411	0.00003828	0.00003464	0.00003571	0.00005583	0.00005177	0.00004182	0.00004037	0.00389516	0.00009933	0.00003111	0.00006130	0.00005014	0.00004916
287	NPL-KIOM-177	Asteraceae	Aster	tataricus	Whole plant	0.00000259	0.00000305	0.00000239	0.00000052	0.00000170	0.00000150	0.00000165	0.00000289	0.00000123	0.00000087	0.00000255	0.00000111	0.00000459	0.00000156	0.00000202	0.00000606	0.00001972	0.00003932	0.00000352	0.00000071	0.00000045	0.00000127	0.00000185	0.00000033	0.00000050	0.00000342	0.00000711	0.00000029	0.00000156	0.00000082	0.00000055	0.00000703	0.00002339	0.00000047	0.00001439	0.00000150	0.00001555	0.00002073	0.00032829	0.00006504	0.00000331	0.00000335	0.00000104	0.00000515
288	NPL-KIOM-178	Paeoniaceae	Paeonia	lactiflora	Root	0.00001440	0.00001280	0.00001082	0.00000581	0.00000815	0.00001010	0.00001119	0.00002750	0.00001704	0.00001204	0.00000783	0.00000619	0.00001395	0.00001010	0.00001225	0.00000689	0.00000292	0.00000772	0.00000632	0.00000441	0.00000212	0.00000116	0.00000293	0.00000182	0.00000192	0.00000075	0.00000333	0.00000006	0.00000107	0.00000040	0.00000038	0.00000122	0.00000095	0.00000024	0.00000033	0.00000000	0.00000570	0.00000004	0.00033155	0.00000081	0.00000000	0.00002122	0.00000000	0.00000000
289	NPL-KIOM-179	Polyporaceae	Polyporus	umbellatus	Mycelium	0.00005786	0.00008900	0.00008450	0.00006638	0.00003643	0.00012995	0.00010547	0.00007320	0.00044274	0.00007274	0.00009497	0.00004827	0.00008932	0.00010212	0.00011010	0.00012803	0.00012359	0.00011065	0.00005686	0.00013392	0.00013881	0.00010554	0.00008338	0.00005877	0.00006595	0.00008577	0.00017015	0.00009599	0.00005853	0.00008675	0.00005501	0.00003609	0.00004673	0.00003495	0.00003775	0.00019970	0.00008912	0.00003374	0.00220326	0.00263000	0.00009052	0.00013419	0.00008496	0.00022943
290	NPL-KIOM-180	Apiaceae	Angelica	decursiva	Root	0.00001215	0.00000864	0.00001497	0.00001003	0.00000784	0.00001077	0.00000812	0.00000937	0.00001464	0.00000827	0.00000278	0.00001204	0.00001655	0.00001044	0.00000278	0.00000427	0.00000559	0.00000193	0.00001463	0.00000194	0.00000559	0.00000729	0.00000157	0.00000032	0.00000166	0.00000118	0.00001181	0.00000076	0.00000779	0.00000125	0.00000087	0.00000000	0.00000003	0.00000010	0.00000000	0.00000135	0.00000176	0.00000022	0.00086793	0.00004548	0.00000048	0.00001567	0.00000000	0.00000001
291	NPL-KIOM-181	Apiaceae	Peucedanum	praeruptorum	Root	0.00000507	0.00000644	0.00000509	0.00000471	0.00000830	0.00000418	0.00000704	0.00000686	0.00000787	0.00000247	0.00000430	0.00000672	0.00000538	0.00000381	0.00000396	0.00000332	0.00002153	0.00000619	0.00000365	0.00000301	0.00000209	0.00000112	0.00001002	0.00000091	0.00000709	0.00000334	0.00000741	0.00000235	0.00000158	0.00000084	0.00000020	0.00000011	0.00000106	0.00000004	0.00000024	0.00000228	0.00000296	0.00000096	0.00047820	0.00001897	0.00000044	0.00008880	0.00000056	0.00000153
292	NPL-KIOM-182	Liliaceae	Fritillaria	thunbergii	Bulb	0.00003205	0.00003734	0.00002460	0.00003401	0.00003094	0.00003304	0.00004104	0.00003539	0.00006275	0.00005125	0.00001955	0.00004777	0.00003694	0.00003950	0.00002798	0.00002661	0.00002973	0.00002783	0.00001385	0.00001449	0.00002872	0.00002905	0.00003648	0.00001263	0.00001416	0.00001866	0.00003458	0.00000925	0.00002771	0.00003726	0.00001019	0.00000994	0.00001459	0.00001685	0.00001911	0.00002592	0.00002882	0.00005752	0.00006786	0.00104400	0.00002064	0.00017446	0.00003013	0.00002167
293	NPL-KIOM-183	Ranunculaceae	Aconitum	carmichaeli	Root	0.00000117	0.00000210	0.00000060	0.00000076	0.00000159	0.00000139	0.00000029	0.00000038	0.00000100	0.00000090	0.00000180	0.00000161	0.00005746	0.00063162	0.00002515	0.00000740	0.00002144	0.00000998	0.00000010	0.00000007	0.00000000	0.00000001	0.00000221	0.00000000	0.00000000	0.00000000	0.00000000	0.00000000	0.00000088	0.00000457	0.00000000	0.00000051	0.00000384	0.00000056	0.00000525	0.00001246	0.00000631	0.00000403	0.00000373	0.00000872	0.00005370	0.00159135	0.00005873	0.00000924
294	NPL-KIOM-184	Fabaceae	Gleditsia	sinensis	Seed, Rind	0.00001633	0.00001106	0.00000988	0.00001598	0.00001005	0.00001732	0.00003417	0.00002646	0.00004881	0.00002450	0.00001990	0.00001593	0.00001812	0.00000872	0.00000872	0.00001010	0.00000432	0.00001331	0.00000509	0.00000282	0.00000282	0.00014432	0.00003435	0.00000497	0.00000373	0.00000905	0.00006576	0.00001933	0.00014116	0.00020619	0.00000767	0.00002584	0.00012610	0.00001211	0.00008348	0.00008243	0.00010489	0.00006420	0.00121355	0.00013833	0.00001469	0.00002309	0.00000456	0.00004714
295	NPL-KIOM-185	Polygonaceae	Rheum	undulatum	Root	0.00000858	0.00000781	0.00000655	0.00000555	0.00000975	0.00001413	0.00001466	0.00001094	0.00002472	0.00000427	0.00000202	0.00000188	0.00000099	0.00000160	0.00000188	0.00000197	0.00000136	0.00000069	0.00000080	0.00000057	0.00000037	0.00000104	0.00000399	0.00000008	0.00000001	0.00000000	0.00000022	0.00000000	0.00000003	0.00000027	0.00000000	0.00000000	0.00000008	0.00000000	0.00000000	0.00000000	0.00000012	0.00000000	0.00017569	0.00000000	0.00000000	0.00000000	0.00000065	0.00000000
296	NPL-KIOM-186	Poaceae	Phyllostachys	nigra	Stem	0.00009240	0.00006007	0.00007657	0.00012106	0.00009480	0.00016392	0.00027783	0.00028072	0.00013352	0.00015372	0.00012715	0.00145471	0.00122966	0.00038645	0.00020699	0.00030514	0.00023969	0.00013232	0.00012953	0.00010878	0.00010793	0.00006242	0.00002651	0.00005376	0.00006255	0.00003858	0.00004381	0.00006613	0.00006877	0.00003811	0.00001843	0.00001485	0.00003759	0.00002249	0.00004473	0.00003255	0.00001668	0.00002380	0.00366189	0.00017501	0.00002395	0.00002421	0.00003461	0.00002027
297	NPL-KIOM-187	Poaceae	Phyllostachys	bambusoides	Stem	0.00007648	0.00006464	0.00005201	0.00010590	0.00007939	0.00008788	0.00016361	0.00018248	0.00012746	0.00010504	0.00010210	0.00070297	0.00080753	0.00022291	0.00012326	0.00016926	0.00015036	0.00011582	0.00007525	0.00005471	0.00006007	0.00004425	0.00003069	0.00003575	0.00005116	0.00005856	0.00003176	0.00003813	0.00005995	0.00002600	0.00001759	0.00004426	0.00002203	0.00001926	0.00002234	0.00002398	0.00001096	0.00000780	0.00199188	0.00010101	0.00001370	0.00001984	0.00001151	0.00000383
298	NPL-KIOM-188	Rutaceae	Citrus	aurantium	Rind, Fruit	0.00000072	0.00000041	0.00000078	0.00000007	0.00000017	0.00000037	0.00000000	0.00000184	0.00000000	0.00000022	0.00000003	0.00000097	0.00000003	0.00002851	0.00000000	0.00000058	0.00000127	0.00000005	0.00000012	0.00000000	0.00000000	0.00000000	0.00001343	0.00000000	0.00000000	0.00000000	0.00000000	0.00000000	0.00000124	0.00001237	0.00000000	0.00000000	0.00000000	0.00000000	0.00000010	0.00000000	0.00000000	0.00000000	0.00000000	0.00000038	0.00051645	0.00004252	0.00006696	0.00000258
299	NPL-KIOM-189	Rutaceae	Citrus	natsudaidai	Rind, Fruit	0.00000605	0.00000243	0.00000197	0.00000182	0.00000221	0.00000136	0.00000090	0.00000045	0.00000082	0.00000065	0.00000117	0.00000061	0.00000020	0.00000039	0.00000055	0.00000004	0.00000008	0.00000017	0.00000023	0.00000000	0.00000006	0.00000411	0.00006555	0.00000002	0.00000000	0.00000000	0.00000015	0.00000000	0.00002506	0.00008826	0.00000000	0.00000000	0.00000000	0.00000000	0.00000000	0.00000004	0.00000000	0.00000747	0.00000010	0.00028381	0.00000036	0.00000229	0.00009020	0.00014224
300	NPL-KIOM-190	Solanaceae	Lycium	chinense	Fruit	0.00000426	0.00000396	0.00000488	0.00000248	0.00000475	0.00000466	0.00000495	0.00014150	0.00010291	0.00008671	0.00004489	0.00002257	0.00002303	0.00002353	0.00002390	0.00002290	0.00005250	0.00002980	0.00001834	0.00001147	0.00000701	0.00001295	0.00001345	0.00000490	0.00002177	0.00000970	0.00000786	0.00000155	0.00000274	0.00000190	0.00000414	0.00028915	0.00004041	0.00007478	0.00008532	0.00010737	0.00000075	0.00000378	0.00089897	0.00003681	0.00025539	0.00002195	0.00000177	0.00000000
301	NPL-KIOM-191	Solanaceae	Lycium	barbarum	Fruit	0.00000594	0.00000650	0.00000214	0.00000521	0.00000718	0.00000783	0.00001207	0.00008164	0.00001780	0.00004001	0.00003831	0.00001719	0.00001509	0.00001234	0.00000674	0.00000905	0.00007255	0.00001968	0.00000563	0.00000342	0.00000436	0.00000831	0.00004655	0.00001195	0.00004986	0.00001104	0.00001212	0.00000644	0.00001479	0.00000926	0.00000470	0.00059502	0.00006208	0.00005593	0.00008706	0.00000915	0.00000537	0.00002371	0.00104532	0.00001527	0.00056692	0.00001221	0.00001678	0.00001733
302	NPL-KIOM-192	Rhamnaceae	Hovenia	dulcis	Fruit	0.00001354	0.00001575	0.00001075	0.00001802	0.00001436	0.00001727	0.00001511	0.00001926	0.00001748	0.00001414	0.00001997	0.00001591	0.00001214	0.00001293	0.00001706	0.00001686	0.00002545	0.00002200	0.00001637	0.00001087	0.00001552	0.00001371	0.00001401	0.00000694	0.00001051	0.00000695	0.00001045	0.00001265	0.00001795	0.00001323	0.00000484	0.00000463	0.00000503	0.00000571	0.00001563	0.00000557	0.00000809	0.00000546	0.00046605	0.00000440	0.00000203	0.00000218	0.00000451	0.00000125
303	NPL-KIOM-193	Asparagaceae	Anemarrhena	asphodeloides	Root	0.00000666	0.00000478	0.00000675	0.00000600	0.00000879	0.00000507	0.00000547	0.00000653	0.00000739	0.00000512	0.00000644	0.00000292	0.00000552	0.00001087	0.00000425	0.00000614	0.00000967	0.00000628	0.00000348	0.00000793	0.00000414	0.00000520	0.00000631	0.00000717	0.00000427	0.00000519	0.00000689	0.00000599	0.00000652	0.00000508	0.00000371	0.00000881	0.00000251	0.00000493	0.00000568	0.00002835	0.00004735	0.00006637	0.00037528	0.00001354	0.00000366	0.00001204	0.00000455	0.00000329
304	NPL-KIOM-194	Amaranthaceae	Kochia	scoparia	Whole plant	0.00001578	0.00002412	0.00001523	0.00001939	0.00000886	0.00001760	0.00001638	0.00001735	0.00001012	0.00001831	0.00001334	0.00001747	0.00000734	0.00001312	0.00001165	0.00001431	0.00001313	0.00000892	0.00001469	0.00001204	0.00000882	0.00010528	0.00000763	0.00000519	0.00000570	0.00000509	0.00000618	0.00000637	0.00012155	0.00007025	0.00000628	0.00001106	0.00001083	0.00000487	0.00001310	0.00000904	0.00000680	0.00000799	0.00094182	0.00000679	0.00000627	0.00001176	0.00001346	0.00004574
305	NPL-KIOM-195	Rutaceae	Poncirus	trifoliata	Fruit, Rind	0.00000261	0.00000206	0.00000290	0.00000149	0.00000201	0.00000241	0.00000883	0.00000231	0.00000333	0.00000150	0.00000129	0.00000205	0.00000152	0.00000532	0.00000483	0.00000757	0.00001627	0.00000940	0.00000451	0.00000160	0.00000103	0.00003076	0.00000056	0.00000076	0.00000104	0.00000091	0.00000245	0.00000078	0.00003015	0.00002363	0.00000104	0.00000051	0.00000102	0.00000362	0.00000160	0.00000509	0.00000370	0.00000596	0.00052237	0.00002232	0.00006572	0.00005726	0.00010225	0.00002220
306	NPL-KIOM-196	Rosaceae	Sanguisorba	officinalis	Root	0.00002073	0.00001311	0.00000906	0.00001319	0.00001208	0.00001352	0.00001516	0.00001949	0.00001937	0.00001435	0.00001194	0.00001618	0.00001098	0.00001684	0.00001040	0.00001620	0.00002156	0.00001264	0.00000631	0.00000698	0.00000713	0.00000678	0.00002362	0.00000955	0.00000580	0.00000711	0.00000579	0.00000427	0.00000999	0.00001531	0.00001366	0.00000228	0.00000280	0.00000243	0.00000432	0.00000558	0.00001170	0.00001131	0.00017329	0.00046396	0.00000035	0.00000274	0.00000476	0.00000794
307	NPL-KIOM-197	Rosaceae	Sanguisorba	officinalis	Root	0.00003054	0.00003082	0.00002517	0.00002307	0.00001733	0.00003003	0.00001932	0.00001539	0.00001662	0.00001202	0.00001651	0.00001522	0.00001349	0.00001167	0.00000935	0.00000846	0.00000716	0.00000466	0.00000970	0.00000457	0.00000321	0.00000446	0.00000701	0.00000588	0.00000058	0.00000075	0.00000246	0.00000164	0.00000274	0.00000077	0.00000203	0.00000011	0.00000001	0.00000003	0.00000047	0.00000409	0.00000014	0.00000031	0.00000141	0.00110195	0.00000007	0.00000000	0.00000938	0.00000026
308	NPL-KIOM-198	Orobanchaceae	Rehmannia	glutinosa	Root	0.00000560	0.00000471	0.00000375	0.00000487	0.00000411	0.00000501	0.00000645	0.00000440	0.00000301	0.00000435	0.00000551	0.00000391	0.00000688	0.00000524	0.00000697	0.00000990	0.00001393	0.00000810	0.00000725	0.00000700	0.00000644	0.00000716	0.00001561	0.00001095	0.00001615	0.00001012	0.00001264	0.00001322	0.00001678	0.00002035	0.00002668	0.00001699	0.00001606	0.00001115	0.00001010	0.00001086	0.00001530	0.00000937	0.00032700	0.00001343	0.00000671	0.00001016	0.00000464	0.00000404
309	NPL-KIOM-199	Gentianaceae	Gentiana	dahurica	Root	0.00000018	0.00000244	0.00000137	0.00000078	0.00000015	0.00000471	0.00000062	0.00000142	0.00000102	0.00000052	0.00000079	0.00000232	0.00000371	0.00000166	0.00000248	0.00001457	0.00000368	0.00000243	0.00000104	0.00000062	0.00000350	0.00000493	0.00000186	0.00001129	0.00000316	0.00000650	0.00001434	0.00002185	0.00002694	0.00002438	0.00004967	0.00005262	0.00003629	0.00001807	0.00000811	0.00000416	0.00000415	0.00000551	0.00082433	0.00003150	0.00000166	0.00001261	0.00000201	0.00000422
310	NPL-KIOM-200	Rutaceae	Citrus	reticulata	Rind, Fruit	0.00000915	0.00000429	0.00000907	0.00000446	0.00000438	0.00000619	0.00000688	0.00000563	0.00000375	0.00000334	0.00000414	0.00000379	0.00000185	0.00000336	0.00000143	0.00000637	0.00001216	0.00001056	0.00000342	0.00000008	0.00000015	0.00000979	0.00000045	0.00000033	0.00000015	0.00000012	0.00000005	0.00000008	0.00000232	0.00000310	0.00000000	0.00000000	0.00000001	0.00000000	0.00000000	0.00000036	0.00000000	0.00000000	0.00001558	0.00047406	0.00000000	0.00003318	0.00000016	0.00000035
311	NPL-KIOM-201	Rutaceae	Citrus	unshiu	Rind, Fruit	0.00000814	0.00001209	0.00000569	0.00000477	0.00000518	0.00000989	0.00000645	0.00000745	0.00000735	0.00000400	0.00000455	0.00000188	0.00000681	0.00001165	0.00000305	0.00000897	0.00000768	0.00000294	0.00000146	0.00000211	0.00000041	0.00000528	0.00000317	0.00000023	0.00000028	0.00000015	0.00000107	0.00000002	0.00000084	0.00000163	0.00000000	0.00000003	0.00000000	0.00000000	0.00000000	0.00000022	0.00000000	0.00000000	0.00000000	0.00064239	0.00000000	0.00000827	0.00000113	0.00000000
312	NPL-KIOM-202	Zygophyllaceae	Tribulus	terrestris	Fruit	0.00002457	0.00001131	0.00001361	0.00002183	0.00001986	0.00002017	0.00002750	0.00003758	0.00001611	0.00002033	0.00001810	0.00002877	0.00002252	0.00001534	0.00001970	0.00001412	0.00001885	0.00002569	0.00000821	0.00001209	0.00000897	0.00015962	0.00000800	0.00000641	0.00000651	0.00000929	0.00001062	0.00000282	0.00016477	0.00015689	0.00000465	0.00000287	0.00000530	0.00000696	0.00000473	0.00001800	0.00002818	0.00001733	0.00031668	0.00161815	0.00000661	0.00003408	0.00018969	0.00001688
313	NPL-KIOM-203	Plantaginaceae	Plantago	asiatica	Seed, Whole plant	0.00027850	0.00015822	0.00014860	0.00012236	0.00020379	0.00022982	0.00015502	0.00024513	0.00025149	0.00014054	0.00019792	0.00017393	0.00015138	0.00025472	0.00017895	0.00029266	0.00019304	0.00017620	0.00017998	0.00023553	0.00024380	0.00025573	0.00019886	0.00020335	0.00025511	0.00023763	0.00025305	0.00019343	0.00033552	0.00025940	0.00030271	0.00023214	0.00027040	0.00024850	0.00025635	0.00017891	0.00022602	0.00028569	0.01060588	0.00029936	0.00023377	0.00016184	0.00022033	0.00022185
314	NPL-KIOM-204	Plantaginaceae	Plantago	depressa	Seed, Whole plant	0.00016320	0.00012840	0.00012213	0.00010650	0.00022585	0.00020600	0.00011828	0.00014081	0.00008836	0.00013286	0.00019319	0.00012905	0.00012062	0.00013394	0.00016313	0.00012251	0.00012549	0.00015389	0.00016838	0.00010581	0.00016934	0.00011447	0.00011670	0.00015280	0.00013906	0.00015457	0.00011462	0.00019899	0.00016839	0.00015500	0.00013579	0.00008928	0.00017249	0.00013923	0.00021443	0.00014018	0.00010351	0.00024855	0.00630149	0.00018663	0.00015440	0.00016057	0.00023155	0.00014034
315	NPL-KIOM-205	Asteraceae	Atractylodes	chinensis	Root	0.00001668	0.00001305	0.00000868	0.00001626	0.00001875	0.00001180	0.00001391	0.00001980	0.00001888	0.00001154	0.00001261	0.00001867	0.00002178	0.00001228	0.00002081	0.00000970	0.00001669	0.00002267	0.00001210	0.00001321	0.00000940	0.00000764	0.00001016	0.00001276	0.00001054	0.00000713	0.00001890	0.00000514	0.00000329	0.00000322	0.00000299	0.00000091	0.00000962	0.00000382	0.00000657	0.00000303	0.00000554	0.00000222	0.00056760	0.00001999	0.00000165	0.00000119	0.00000128	0.00000389
316	NPL-KIOM-206	Asteraceae	Atractylodes	lancea	Root	0.00001033	0.00000546	0.00000728	0.00000962	0.00000897	0.00000890	0.00000473	0.00000637	0.00000739	0.00000227	0.00000537	0.00000782	0.00000609	0.00000703	0.00000968	0.00000841	0.00000884	0.00002127	0.00000565	0.00000457	0.00000487	0.00000461	0.00000424	0.00001060	0.00000622	0.00000676	0.00001656	0.00000378	0.00000573	0.00000226	0.00000184	0.00000235	0.00000314	0.00000147	0.00000250	0.00000464	0.00000843	0.00001037	0.00052211	0.00002135	0.00000237	0.00000224	0.00000408	0.00000810
317	NPL-KIOM-207	Apiaceae	Cnidium	officinale	Root	0.00001134	0.00000557	0.00000535	0.00000764	0.00001170	0.00001141	0.00001372	0.00002973	0.00001537	0.00000608	0.00000521	0.00000923	0.00001412	0.00001007	0.00000506	0.00001425	0.00004266	0.00000684	0.00001580	0.00001046	0.00000437	0.00000557	0.00004074	0.00000467	0.00003134	0.00000608	0.00000725	0.00000536	0.00000463	0.00000233	0.00000397	0.00000332	0.00000365	0.00000228	0.00000393	0.00000321	0.00000899	0.00000284	0.00061272	0.00000541	0.00000167	0.00018143	0.00000974	0.00000402
318	NPL-KIOM-208	Apiaceae	Ligusticum	chuanxiong	Root	0.00001175	0.00000548	0.00000523	0.00000656	0.00000973	0.00000522	0.00000549	0.00002543	0.00001257	0.00000680	0.00000526	0.00000847	0.00000646	0.00000746	0.00000685	0.00000548	0.00005070	0.00000623	0.00000768	0.00000698	0.00000464	0.00000322	0.00004626	0.00000512	0.00004001	0.00000694	0.00000849	0.00000316	0.00000494	0.00000117	0.00000292	0.00000179	0.00000104	0.00000075	0.00000240	0.00000241	0.00000266	0.00000345	0.00038320	0.00000192	0.00000151	0.00004236	0.00000245	0.00000504
319	NPL-KIOM-209	Araceae	Arisaema	amurense	Root	0.00002674	0.00001918	0.00001442	0.00002107	0.00001942	0.00002708	0.00002489	0.00003502	0.00002591	0.00001546	0.00001815	0.00001956	0.00002703	0.00003066	0.00001199	0.00002066	0.00002633	0.00003606	0.00001521	0.00001319	0.00001943	0.00002037	0.00001586	0.00001380	0.00000895	0.00002566	0.00003055	0.00002466	0.00005344	0.00003095	0.00002621	0.00004378	0.00003409	0.00002053	0.00005431	0.00004743	0.00010700	0.00005574	0.00157129	0.00001501	0.00001263	0.00007471	0.00003615	0.00015849
320	NPL-KIOM-210	Orchidaceae	Gastrodia	elata	Bulb	0.00001492	0.00001479	0.00001261	0.00001172	0.00002032	0.00000798	0.00003547	0.00001211	0.00001769	0.00000941	0.00001817	0.00001518	0.00001555	0.00002102	0.00001244	0.00002683	0.00001831	0.00001965	0.00001293	0.00001716	0.00001110	0.00001264	0.00000817	0.00001369	0.00001322	0.00001804	0.00007213	0.00001522	0.00001721	0.00001878	0.00001737	0.00001988	0.00004377	0.00002755	0.00002058	0.00003475	0.00008574	0.00004568	0.00091646	0.00002214	0.00001875	0.00012404	0.00002305	0.00008236
321	NPL-KIOM-211	Asparagaceae	Asparagus	cochinchinensis	Root	0.00000624	0.00000949	0.00000615	0.00000643	0.00000430	0.00000709	0.00000893	0.00000479	0.00000634	0.00000711	0.00000712	0.00000632	0.00000673	0.00000715	0.00000482	0.00000602	0.00000784	0.00000814	0.00002367	0.00001071	0.00000391	0.00000529	0.00001132	0.00000807	0.00001492	0.00001744	0.00001708	0.00002759	0.00001081	0.00000623	0.00000839	0.00000777	0.00000656	0.00000630	0.00000908	0.00000816	0.00001028	0.00000915	0.00022458	0.00000398	0.00000469	0.00000609	0.00000615	0.00000968
322	NPL-KIOM-212	Rutaceae	Citrus	reticulata	Rind, Fruit	0.00000762	0.00000651	0.00000730	0.00000583	0.00000380	0.00000840	0.00000694	0.00000679	0.00001209	0.00000749	0.00000583	0.00000696	0.00000624	0.00001098	0.00000664	0.00001273	0.00000658	0.00000915	0.00001148	0.00000606	0.00000915	0.00001517	0.00000322	0.00000329	0.00000375	0.00000325	0.00001218	0.00000578	0.00000700	0.00001068	0.00000523	0.00000435	0.00000423	0.00000486	0.00000363	0.00001017	0.00001049	0.00001272	0.00004187	0.00043885	0.00000376	0.00004266	0.00001240	0.00002756
323	NPL-KIOM-213	Rutaceae	Citrus	unshiu	Rind, Fruit	0.00000255	0.00000218	0.00000231	0.00000404	0.00000229	0.00000539	0.00000642	0.00000579	0.00000752	0.00000191	0.00000133	0.00001088	0.00000676	0.00000533	0.00000254	0.00000428	0.00000595	0.00000412	0.00000296	0.00000183	0.00000040	0.00001429	0.00000019	0.00000077	0.00000039	0.00000079	0.00000253	0.00000114	0.00001133	0.00000727	0.00000022	0.00000049	0.00000069	0.00000053	0.00000000	0.00000355	0.00000517	0.00000233	0.00041821	0.00016648	0.00000041	0.00003408	0.00000293	0.00000370
324	NPL-KIOM-214	Zingiberaceae	Amomum	tsao-ko	Seed	0.00003257	0.00002273	0.00001978	0.00008280	0.00002487	0.00004029	0.00006469	0.00020268	0.00006005	0.00002849	0.00002213	0.00001939	0.00002058	0.00002615	0.00008809	0.00013268	0.00009142	0.00035835	0.00002551	0.00001396	0.00001613	0.00001961	0.00000375	0.00000986	0.00000458	0.00000589	0.00000713	0.00000502	0.00000658	0.00000277	0.00000275	0.00001171	0.00001245	0.00000257	0.00001871	0.00000862	0.00000646	0.00000433	0.00495921	0.00037548	0.00003110	0.00000666	0.00001740	0.00001226
325	NPL-KIOM-215	Zingiberaceae	Alpinia	katsumadai	Seed, Root	0.00002915	0.00002950	0.00002635	0.00003000	0.00001806	0.00002149	0.00006646	0.00003094	0.00003135	0.00001263	0.00001577	0.00000866	0.00001751	0.00002270	0.00001225	0.00002187	0.00002714	0.00001268	0.00001786	0.00001249	0.00001174	0.00007506	0.00000658	0.00000508	0.00000614	0.00000935	0.00001994	0.00000618	0.00005847	0.00003846	0.00000461	0.00000034	0.00000718	0.00000196	0.00000550	0.00000296	0.00000758	0.00002550	0.00315021	0.00001220	0.00000693	0.00001656	0.00000738	0.00000521
326	NPL-KIOM-216	Rubiaceae	Gardenia	jasminoides	Fruit	0.00001123	0.00001007	0.00000681	0.00001149	0.00000778	0.00000828	0.00000815	0.00001065	0.00003927	0.00002909	0.00001462	0.00001190	0.00001779	0.00003915	0.00001150	0.00002286	0.00002918	0.00000908	0.00001085	0.00000763	0.00002261	0.00001529	0.00004482	0.00000525	0.00000291	0.00000293	0.00000701	0.00000218	0.00000237	0.00000109	0.00000461	0.00000729	0.00000488	0.00000104	0.00000207	0.00000580	0.00000199	0.00000073	0.00000149	0.00072169	0.00000090	0.00000165	0.00000123	0.00000112
327	NPL-KIOM-217	Anacardiaceae	Rhus	verniciflua	Rind	0.00004752	0.00003263	0.00003408	0.00002885	0.00003527	0.00002350	0.00004052	0.00006046	0.00007269	0.00003719	0.00001844	0.00003549	0.00005061	0.00002338	0.00003124	0.00003156	0.00002458	0.00002464	0.00002513	0.00001197	0.00001507	0.00005000	0.00003168	0.00001449	0.00002078	0.00002314	0.00002384	0.00002563	0.00003568	0.00004694	0.00001268	0.00001172	0.00001567	0.00001015	0.00002864	0.00001337	0.00006669	0.00002349	0.00264772	0.00000659	0.00000593	0.00003791	0.00002421	0.00001199
328	NPL-KIOM-218	Lamiaceae	Lycopus	lucidus	Whole plant	0.00002358	0.00003487	0.00002774	0.00002925	0.00002275	0.00001665	0.00003554	0.00004068	0.00005525	0.00002062	0.00003434	0.00003438	0.00002038	0.00002274	0.00002443	0.00003612	0.00003467	0.00002493	0.00001715	0.00001967	0.00001175	0.00001522	0.00000746	0.00001561	0.00001327	0.00000932	0.00001735	0.00000794	0.00001319	0.00000975	0.00000613	0.00000980	0.00001283	0.00000645	0.00000787	0.00000846	0.00001543	0.00000779	0.00113162	0.00001132	0.00000755	0.00002845	0.00000508	0.00000751
329	NPL-KIOM-219	Alismataceae	Alisma	orientale	Root	0.00001090	0.00001177	0.00001231	0.00001010	0.00001483	0.00001385	0.00001090	0.00001790	0.00001656	0.00001355	0.00001259	0.00001592	0.00001399	0.00001538	0.00001413	0.00001555	0.00001314	0.00002044	0.00001978	0.00001235	0.00001939	0.00013252	0.00001340	0.00001075	0.00001576	0.00001122	0.00003106	0.00001367	0.00019240	0.00007325	0.00000783	0.00001271	0.00001238	0.00001048	0.00001689	0.00001925	0.00003664	0.00001430	0.00075733	0.00000317	0.00000273	0.00001967	0.00000829	0.00001829
330	NPL-KIOM-220	Asteraceae	Inula	helenium	Root	0.00000598	0.00000378	0.00000730	0.00000785	0.00000773	0.00000700	0.00000590	0.00000730	0.00000661	0.00000532	0.00000724	0.00000639	0.00000763	0.00001280	0.00000682	0.00000426	0.00000362	0.00000581	0.00000616	0.00000256	0.00000447	0.00000644	0.00000357	0.00000445	0.00000373	0.00000413	0.00000329	0.00000248	0.00000502	0.00000351	0.00000326	0.00000190	0.00000176	0.00000281	0.00000285	0.00000282	0.00000297	0.00000318	0.00025811	0.00000319	0.00000438	0.00000349	0.00000263	0.00000261
331	NPL-KIOM-221	Smilacaceae	Smilax	china	Root	0.00002530	0.00002457	0.00002805	0.00001307	0.00002476	0.00003509	0.00002678	0.00003334	0.00003142	0.00001687	0.00002858	0.00002678	0.00002331	0.00002187	0.00001911	0.00002072	0.00003151	0.00003260	0.00002343	0.00000969	0.00001108	0.00004564	0.00001148	0.00001405	0.00000899	0.00000802	0.00001332	0.00001008	0.00003954	0.00003436	0.00000515	0.00000770	0.00000624	0.00000529	0.00000668	0.00000487	0.00001941	0.00000278	0.00072137	0.00001212	0.00000137	0.00000809	0.00000178	0.00000123
332	NPL-KIOM-222	Convolvulaceae	Cuscuta	chinensis	Whole plant	0.00004466	0.00005334	0.00004260	0.00004455	0.00003672	0.00005270	0.00003343	0.00004143	0.00005662	0.00003428	0.00002867	0.00003443	0.00002994	0.00003663	0.00002835	0.00004008	0.00003156	0.00003288	0.00006318	0.00002183	0.00003328	0.00009262	0.00001419	0.00000613	0.00002370	0.00003855	0.00002840	0.00004216	0.00012042	0.00003575	0.00000507	0.00000433	0.00000634	0.00000691	0.00000383	0.00000917	0.00001007	0.00000299	0.00235272	0.00003930	0.00000788	0.00007632	0.00003514	0.00009004
333	NPL-KIOM-223	Rubiaceae	Morinda	officinalis	Root	0.00000539	0.00000637	0.00000556	0.00000339	0.00000261	0.00000514	0.00000496	0.00000654	0.00000417	0.00000744	0.00000591	0.00000575	0.00000524	0.00000569	0.00000706	0.00000449	0.00000469	0.00000629	0.00000518	0.00000814	0.00000655	0.00000501	0.00000659	0.00000517	0.00000529	0.00000697	0.00000827	0.00000721	0.00000329	0.00000781	0.00000605	0.00000695	0.00000572	0.00000383	0.00000876	0.00000435	0.00000539	0.00000375	0.00024149	0.00000967	0.00000172	0.00000456	0.00000737	0.00001127
334	NPL-KIOM-224	Asteraceae	Eupatorium	fortunei	Whole plant	0.00002061	0.00001642	0.00002066	0.00003241	0.00001857	0.00002139	0.00002281	0.00003197	0.00002684	0.00002012	0.00002660	0.00004407	0.00005037	0.00003115	0.00002617	0.00004764	0.00005525	0.00003080	0.00003242	0.00002588	0.00001422	0.00008825	0.00002300	0.00001331	0.00001752	0.00002216	0.00001667	0.00001645	0.00008669	0.00009577	0.00001859	0.00001148	0.00003212	0.00001682	0.00002456	0.00003506	0.00002416	0.00005059	0.00105620	0.00016061	0.00002055	0.00003440	0.00002538	0.00003857
335	NPL-KIOM-225	Asteraceae	Taraxacum	coreanum	Whole plant	0.00000427	0.00000479	0.00000555	0.00000835	0.00000529	0.00001113	0.00000635	0.00000809	0.00000902	0.00000190	0.00000362	0.00000707	0.00000934	0.00000608	0.00001200	0.00001987	0.00002468	0.00004925	0.00000585	0.00000323	0.00000510	0.00011968	0.00000257	0.00000300	0.00000111	0.00000116	0.00001720	0.00000996	0.00010322	0.00011086	0.00000424	0.00000182	0.00001225	0.00000157	0.00000360	0.00000326	0.00001536	0.00001483	0.00017968	0.00083248	0.00000233	0.00008121	0.00001196	0.00002551
336	NPL-KIOM-226	Asteraceae	Taraxacum	mongolicum	Whole plant	0.00001299	0.00001043	0.00000592	0.00001112	0.00000628	0.00000745	0.00001162	0.00000959	0.00002016	0.00000572	0.00000521	0.00000788	0.00000875	0.00000919	0.00000591	0.00001612	0.00003188	0.00002700	0.00001522	0.00000569	0.00000331	0.00015675	0.00014488	0.00000275	0.00000182	0.00000386	0.00002195	0.00000457	0.00021606	0.00038680	0.00001344	0.00001948	0.00002824	0.00000467	0.00002243	0.00002988	0.00001646	0.00002848	0.00000491	0.00106171	0.00001164	0.00024575	0.00005667	0.00001420
337	NPL-KIOM-227	Asteraceae	Taraxacum	officinale	Whole plant	0.00000511	0.00000731	0.00000730	0.00000415	0.00000886	0.00001011	0.00001046	0.00001105	0.00003661	0.00001205	0.00000846	0.00001259	0.00001462	0.00002113	0.00001489	0.00003215	0.00004594	0.00004730	0.00003002	0.00001271	0.00000901	0.00004089	0.00014202	0.00001850	0.00001282	0.00002593	0.00005291	0.00000944	0.00011683	0.00024202	0.00001750	0.00001301	0.00003719	0.00002107	0.00002734	0.00008464	0.00004269	0.00004341	0.00014517	0.00134776	0.00001607	0.00013444	0.00009873	0.00005989
338	NPL-KIOM-228	Piperaceae	Piper	longum	Fruit	0.00002212	0.00001369	0.00002102	0.00002138	0.00001979	0.00002622	0.00007321	0.00003422	0.00002130	0.00003289	0.00001968	0.00003857	0.00001531	0.00001292	0.00001540	0.00003330	0.00003020	0.00003797	0.00002807	0.00001542	0.00001105	0.00012097	0.00001873	0.00000782	0.00001009	0.00001238	0.00001162	0.00001450	0.00014560	0.00004906	0.00000293	0.00003971	0.00000497	0.00000492	0.00003684	0.00000144	0.00004059	0.00000723	0.00150661	0.00001221	0.00000480	0.00013423	0.00000541	0.00000205
339	NPL-KIOM-229	Polygonaceae	Polygonum	multiflorum	Root	0.00004341	0.00003177	0.00002602	0.00002988	0.00002181	0.00001761	0.00003999	0.00002818	0.00001684	0.00001608	0.00002249	0.00002283	0.00002205	0.00002827	0.00001752	0.00003324	0.00002668	0.00001917	0.00001755	0.00001939	0.00002123	0.00001814	0.00001511	0.00001287	0.00002619	0.00002211	0.00004473	0.00001882	0.00001631	0.00000750	0.00000292	0.00001009	0.00000258	0.00001154	0.00000786	0.00001369	0.00000626	0.00000873	0.00104867	0.00001390	0.00000329	0.00001492	0.00000299	0.00000277
340	NPL-KIOM-230	Asteraceae	Eclipta	prostrata	Whole plant	0.00002145	0.00002266	0.00002328	0.00001937	0.00002573	0.00003049	0.00001858	0.00004148	0.00001699	0.00001936	0.00001177	0.00003249	0.00003742	0.00002600	0.00001919	0.00001911	0.00006200	0.00002349	0.00001952	0.00001270	0.00000589	0.00001276	0.00003417	0.00001183	0.00001222	0.00001305	0.00002826	0.00001375	0.00001498	0.00001407	0.00000686	0.00000384	0.00001028	0.00001047	0.00001127	0.00000953	0.00000823	0.00001041	0.00134701	0.00001712	0.00000924	0.00002117	0.00001043	0.00003076
341	NPL-KIOM-231	Asteraceae	Artemisia	iwayomogi	Leaf	0.00002311	0.00001707	0.00002266	0.00001637	0.00002175	0.00001552	0.00002257	0.00003889	0.00003847	0.00001009	0.00002194	0.00002984	0.00003602	0.00001431	0.00001576	0.00002731	0.00003033	0.00002108	0.00002146	0.00000598	0.00000438	0.00004208	0.00000508	0.00000110	0.00000224	0.00000248	0.00000378	0.00000293	0.00002493	0.00002273	0.00000000	0.00000010	0.00000361	0.00000050	0.00000264	0.00000260	0.00000027	0.00000165	0.00120482	0.00001449	0.00000120	0.00000221	0.00000230	0.00000282
342	NPL-KIOM-232	Fabaceae	Albizzia	julibrissin	Flower, Fruit	0.00001191	0.00001642	0.00000640	0.00000995	0.00001257	0.00001365	0.00001955	0.00001679	0.00003617	0.00001376	0.00002145	0.00002798	0.00001800	0.00001758	0.00000568	0.00001717	0.00000753	0.00000576	0.00004454	0.00000508	0.00001149	0.00001440	0.00002424	0.00000668	0.00000370	0.00000597	0.00000775	0.00000713	0.00001277	0.00002017	0.00000229	0.00000477	0.00000416	0.00000868	0.00000534	0.00003190	0.00001190	0.00001975	0.00013002	0.00452218	0.00000313	0.00000719	0.00007231	0.00003220
343	NPL-KIOM-233	Araliaceae	Kalopanax	pictus	Rind	0.00002367	0.00001992	0.00002626	0.00003735	0.00004363	0.00003461	0.00003388	0.00005349	0.00003984	0.00003593	0.00009177	0.00010464	0.00005772	0.00002821	0.00002659	0.00003807	0.00001805	0.00001654	0.00001088	0.00000925	0.00001534	0.00001774	0.00001287	0.00000648	0.00001280	0.00000913	0.00000741	0.00000413	0.00000275	0.00000652	0.00000130	0.00000750	0.00000436	0.00000321	0.00000071	0.00002186	0.00000840	0.00000821	0.00276980	0.00236657	0.00002186	0.00001867	0.00000387	0.00001960
344	NPL-KIOM-234	Apiaceae	Glehnia	littoralis	Root	0.00000956	0.00001249	0.00001583	0.00001416	0.00001238	0.00001102	0.00001272	0.00002240	0.00001821	0.00001151	0.00001134	0.00001152	0.00001103	0.00001163	0.00001397	0.00000655	0.00003146	0.00001186	0.00000566	0.00001397	0.00001005	0.00001279	0.00002704	0.00000736	0.00002825	0.00000620	0.00002694	0.00001009	0.00000327	0.00000530	0.00000325	0.00000296	0.00001455	0.00000154	0.00000615	0.00000468	0.00001776	0.00001083	0.00083163	0.00000733	0.00000562	0.00011104	0.00001331	0.00001753
345	NPL-KIOM-235	Rosaceae	Prunus	armeniaca	Fruit	0.00000823	0.00385127	0.00010699	0.00007905	0.00007270	0.00005344	0.00005255	0.00005334	0.00005045	0.00004116	0.00003922	0.00003854	0.00003310	0.00004347	0.00003267	0.00003180	0.00002419	0.00003036	0.00002175	0.00003090	0.00003410	0.00002811	0.00002149	0.00002672	0.00002198	0.00001352	0.00003522	0.00001515	0.00000986	0.00001837	0.00000599	0.00001241	0.00000353	0.00000400	0.00001042	0.00001113	0.00000636	0.00000336	0.00084818	0.00001099	0.00000223	0.00001189	0.00000309	0.00000082
346	NPL-KIOM-236	Rosaceae	Prunus	mandshurica	Fruit	0.00005550	0.00456868	0.00006005	0.00004582	0.00006234	0.00004967	0.00004280	0.00004714	0.00003592	0.00004897	0.00003428	0.00004219	0.00003161	0.00005104	0.00003214	0.00002769	0.00003098	0.00003414	0.00003749	0.00002693	0.00003063	0.00004315	0.00003274	0.00002619	0.00003312	0.00003354	0.00003925	0.00003157	0.00004016	0.00003754	0.00003136	0.00001941	0.00002871	0.00001465	0.00003220	0.00002605	0.00002554	0.00002526	0.00075991	0.00002364	0.00002059	0.00003265	0.00001995	0.00002741
347	NPL-KIOM-237	Cyperaceae	Cyperus	rotundus	Root	0.00001905	0.00000878	0.00000751	0.00001226	0.00000843	0.00001816	0.00001729	0.00002047	0.00000775	0.00001459	0.00000686	0.00000897	0.00000881	0.00001846	0.00000893	0.00001379	0.00001027	0.00001274	0.00000582	0.00000828	0.00001226	0.00001483	0.00000414	0.00000179	0.00000803	0.00000606	0.00000728	0.00000491	0.00000503	0.00000775	0.00000458	0.00000774	0.00000813	0.00000350	0.00000947	0.00000925	0.00002483	0.00001042	0.00102746	0.00000864	0.00000658	0.00001948	0.00000786	0.00000943
348	NPL-KIOM-238	Lamiaceae	Elsholtzia	ciliata	Whole plant	0.00000771	0.00001301	0.00001548	0.00002324	0.00001273	0.00001822	0.00001337	0.00002940	0.00001804	0.00006459	0.00005883	0.00001511	0.00001456	0.00001368	0.00000663	0.00002493	0.00003715	0.00001318	0.00001079	0.00000278	0.00000789	0.00000533	0.00001956	0.00000295	0.00001156	0.00000591	0.00003809	0.00000340	0.00000515	0.00000193	0.00000223	0.00000074	0.00000119	0.00000016	0.00000447	0.00001994	0.00000212	0.00000099	0.00110625	0.00001426	0.00000079	0.00009778	0.00000636	0.00002770
349	NPL-KIOM-239	Scrophulariaceae	Scrophularia	buergeriana	Whole plant	0.00000064	0.00000070	0.00000018	0.00000019	0.00000011	0.00000038	0.00000058	0.00000073	0.00000155	0.00000026	0.00000001	0.00000036	0.00000045	0.00000017	0.00000067	0.00000297	0.00001030	0.00000985	0.00000176	0.00000204	0.00000276	0.00000600	0.00001468	0.00001859	0.00002516	0.00003809	0.00005728	0.00009066	0.00011890	0.00010320	0.00008078	0.00010494	0.00009087	0.00007053	0.00011856	0.00008015	0.00011678	0.00010608	0.00041799	0.00008054	0.00005457	0.00009413	0.00003179	0.00002357
350	NPL-KIOM-240	Scrophulariaceae	Scrophularia	ningpoensis	Whole plant	0.00000070	0.00000058	0.00000093	0.00000038	0.00000024	0.00000097	0.00000102	0.00000254	0.00000071	0.00000073	0.00000050	0.00000118	0.00000142	0.00000199	0.00000250	0.00000597	0.00001048	0.00000845	0.00000778	0.00000959	0.00000940	0.00001847	0.00003253	0.00003723	0.00005342	0.00007222	0.00009582	0.00013633	0.00016596	0.00014355	0.00009053	0.00007611	0.00006703	0.00005287	0.00004943	0.00005210	0.00004969	0.00006148	0.00067818	0.00001934	0.00002001	0.00003113	0.00002413	0.00002532
351	NPL-KIOM-241	Geraniaceae	Geranium	thunbergii	Whole plant	0.00000969	0.00000655	0.00000519	0.00000507	0.00000540	0.00000337	0.00000790	0.00001102	0.00001103	0.00005638	0.00006498	0.00002120	0.00001486	0.00000621	0.00001201	0.00001489	0.00000926	0.00000915	0.00000729	0.00000244	0.00000343	0.00003372	0.00000559	0.00000252	0.00000053	0.00000207	0.00000594	0.00000667	0.00003212	0.00002467	0.00000055	0.00000307	0.00000131	0.00000190	0.00000238	0.00000642	0.00000273	0.00000519	0.00067042	0.00003597	0.00000201	0.00001130	0.00001072	0.00013491
352	NPL-KIOM-242	Papaveraceae	Corydalis	ternata	Root	0.00001456	0.00001508	0.00002187	0.00001738	0.00001881	0.00001965	0.00002059	0.00046665	0.00008812	0.00008437	0.00001096	0.00002055	0.00001259	0.00001461	0.00001160	0.00000861	0.00001809	0.00001550	0.00001075	0.00000927	0.00000605	0.00001576	0.00000791	0.00000914	0.00000615	0.00000892	0.00001720	0.00000155	0.00000807	0.00000580	0.00000666	0.00000204	0.00000708	0.00001334	0.00051846	0.00002712	0.00003748	0.00001399	0.00141641	0.00000171	0.00000266	0.00001506	0.00001303	0.00001015
353	NPL-KIOM-243	Papaveraceae	Corydalis	yanhusuo	Root	0.00001501	0.00001736	0.00001386	0.00002213	0.00003043	0.00002450	0.00008373	0.00165604	0.00058038	0.00002796	0.00004903	0.00000916	0.00000826	0.00000821	0.00001238	0.00001323	0.00000953	0.00000697	0.00000736	0.00000708	0.00000342	0.00002442	0.00000456	0.00000526	0.00000732	0.00000838	0.00002515	0.00001268	0.00004137	0.00002172	0.00002660	0.00004763	0.00025848	0.00002866	0.00078662	0.00000669	0.00000850	0.00001622	0.00118358	0.00000315	0.00000790	0.00007227	0.00001360	0.00001619
354	NPL-KIOM-244	Lamiaceae	Schizonepeta	tenuifolia	Whole plant	0.00001671	0.00001346	0.00000886	0.00001198	0.00000977	0.00000823	0.00000835	0.00001678	0.00005073	0.00000765	0.00000823	0.00001769	0.00001250	0.00002323	0.00001287	0.00000944	0.00003226	0.00000812	0.00001186	0.00000857	0.00001024	0.00000666	0.00001127	0.00000993	0.00000704	0.00000319	0.00001978	0.00000351	0.00000291	0.00000348	0.00000868	0.00000653	0.00000748	0.00001033	0.00000898	0.00001090	0.00001076	0.00001702	0.00071217	0.00000751	0.00000488	0.00002371	0.00001273	0.00002146
355	NPL-KIOM-245	Fabaceae	Trigonella	foenum-graecum	Seed	0.00000811	0.00000650	0.00000602	0.00000700	0.00001228	0.00001641	0.00000917	0.00001022	0.00002407	0.00001634	0.00000969	0.00001075	0.00001529	0.00001383	0.00002108	0.00002521	0.00002847	0.00005539	0.00003648	0.00003903	0.00007111	0.00377129	0.00000136	0.00000485	0.00001557	0.00006634	0.00004827	0.00011980	0.00468159	0.00283964	0.00000000	0.00000000	0.00000740	0.00000728	0.00000981	0.00000270	0.00000279	0.00000781	0.00051128	0.00001053	0.00001888	0.00004852	0.00023264	0.00050718
356	NPL-KIOM-246	Polygonaceae	Polygonum	cuspidatum	Root	0.00002637	0.00002488	0.00003329	0.00001676	0.00002962	0.00003291	0.00002137	0.00018608	0.00002587	0.00003219	0.00005410	0.00002428	0.00001671	0.00001900	0.00002077	0.00001556	0.00002147	0.00001338	0.00001690	0.00001990	0.00000961	0.00002163	0.00001070	0.00000835	0.00000875	0.00000701	0.00001278	0.00000659	0.00001879	0.00001999	0.00000363	0.00000208	0.00000277	0.00000223	0.00000281	0.00000430	0.00000859	0.00000301	0.00080208	0.00001027	0.00000138	0.00000355	0.00000376	0.00000133
357	NPL-KIOM-247	Asteraceae	Carthamus	tinctorius	Flower, Seed	0.00000670	0.00000772	0.00000602	0.00000409	0.00000698	0.00000636	0.00000919	0.00000903	0.00000535	0.00000394	0.00000572	0.00000046	0.00000269	0.00000203	0.00000104	0.00000681	0.00000883	0.00000883	0.00000314	0.00000255	0.00000183	0.00010064	0.00001653	0.00000223	0.00000333	0.00000222	0.00000573	0.00000071	0.00010448	0.00013120	0.00000262	0.00000177	0.00000453	0.00000158	0.00000286	0.00003040	0.00001576	0.00001234	0.00005079	0.00152800	0.00007945	0.00004357	0.00009588	0.00011864
358	NPL-KIOM-248	Asteraceae	Carthamus	tinctorius	Flower, Seed	0.00005015	0.00003514	0.00003468	0.00003022	0.00004076	0.00002263	0.00003047	0.00003794	0.00001456	0.00002657	0.00001646	0.00005385	0.00002688	0.00003429	0.00002153	0.00003280	0.00002968	0.00002753	0.00002666	0.00000885	0.00003274	0.00015306	0.00001527	0.00002125	0.00001925	0.00001962	0.00006111	0.00002106	0.00017507	0.00007815	0.00002449	0.00000922	0.00001780	0.00002729	0.00002220	0.00004481	0.00001712	0.00002499	0.00186832	0.00001178	0.00001102	0.00008260	0.00003130	0.00004374
359	NPL-KIOM-249	Lamiaceae	Scutellaria	baicalensis	Root	0.00001059	0.00001123	0.00000933	0.00000929	0.00001384	0.00000924	0.00000698	0.00001197	0.00000799	0.00000854	0.00000530	0.00000420	0.00000909	0.00001023	0.00000608	0.00000639	0.00000723	0.00000442	0.00000466	0.00000443	0.00000356	0.00000364	0.00000286	0.00000296	0.00000296	0.00000179	0.00000132	0.00000184	0.00000158	0.00000215	0.00000178	0.00000106	0.00000067	0.00000146	0.00000040	0.00000197	0.00000133	0.00000069	0.00001709	0.00036946	0.00000226	0.00000403	0.00003045	0.00001159
360	NPL-KIOM-250	Fabaceae	Astragalus	membranaceus	Root	0.00001829	0.00002169	0.00001006	0.00001337	0.00001159	0.00000811	0.00000865	0.00001139	0.00000970	0.00000895	0.00000844	0.00001005	0.00000706	0.00001124	0.00001496	0.00001034	0.00000755	0.00000414	0.00000741	0.00000716	0.00003373	0.00003935	0.00000799	0.00000697	0.00000541	0.00000849	0.00001945	0.00000336	0.00005422	0.00001955	0.00000744	0.00000460	0.00000312	0.00000145	0.00000716	0.00001286	0.00000155	0.00000481	0.00124965	0.00000203	0.00000121	0.00001445	0.00006948	0.00004546
361	NPL-KIOM-251	Fabaceae	Astragalus	membranaceus	Root	0.00000905	0.00000624	0.00000642	0.00000740	0.00000380	0.00000381	0.00000749	0.00000291	0.00000250	0.00000227	0.00000159	0.00000494	0.00000137	0.00000264	0.00000467	0.00000379	0.00000369	0.00000441	0.00000249	0.00000364	0.00000332	0.00012219	0.00000464	0.00000360	0.00000354	0.00000269	0.00001183	0.00000391	0.00011026	0.00010538	0.00000064	0.00000302	0.00000580	0.00000359	0.00001062	0.00001631	0.00000929	0.00002315	0.00040184	0.00006879	0.00000474	0.00001368	0.00001315	0.00005023
362	NPL-KIOM-252	Ranunculaceae	Coptis	chinensis	Root	0.00000000	0.00000000	0.00000000	0.00000000	0.00003843	0.00000407	0.00000000	0.00000463	0.01708155	0.01144349	0.00165399	0.00048374	0.00042635	0.00027001	0.00014677	0.00011564	0.00011080	0.00009710	0.00004853	0.00002796	0.00001908	0.00009244	0.00003936	0.00002622	0.00000059	0.00000030	0.00000030	0.00000000	0.00001645	0.00002620	0.00002840	0.00000247	0.00000000	0.00004151	0.00012615	0.00715209	0.00063422	0.01922314	0.00206930	0.00073751	0.00025829	0.00020587	0.00005783	0.00014914
363	NPL-KIOM-253	Ranunculaceae	Coptis	deltoidea	Root	0.00000001	0.00000006	0.00000055	0.00000000	0.00005267	0.00002484	0.00000152	0.00005103	0.01815060	0.01047978	0.00108189	0.00021681	0.00017804	0.00015236	0.00009491	0.00014161	0.00066376	0.00007419	0.00005204	0.00002126	0.00001004	0.00004650	0.00005170	0.00015003	0.00000305	0.00000666	0.00002031	0.00000066	0.00004680	0.00009792	0.00005543	0.00001583	0.00000549	0.00004512	0.00019719	0.00597371	0.00164046	0.01910453	0.00315560	0.00036025	0.00010177	0.00015620	0.00019527	0.00002508
364	NPL-KIOM-254	Ranunculaceae	Coptis	japonica	Root	0.00000004	0.00000040	0.00000938	0.00000000	0.00001652	0.00002445	0.00042239	0.00033371	0.01168658	0.00605733	0.00071410	0.00014987	0.00014638	0.00009557	0.00003699	0.00007799	0.00004623	0.00004935	0.00001655	0.00000497	0.00000234	0.00002131	0.00000161	0.00000085	0.00000003	0.00000017	0.00000056	0.00000000	0.00002563	0.00007730	0.00015066	0.00000148	0.00000145	0.00010287	0.00006312	0.00253610	0.00159436	0.01402782	0.00105182	0.00016214	0.00008216	0.00005916	0.00000486	0.00000000
365	NPL-KIOM-255	Ranunculaceae	Coptis	teeta	Root	0.00000000	0.00000000	0.00000000	0.00000000	0.00006460	0.00000497	0.00001357	0.00001371	0.02137095	0.01084756	0.00063375	0.00025928	0.00023203	0.00015999	0.00008535	0.00029762	0.00031622	0.00006150	0.00003411	0.00001683	0.00001856	0.00004143	0.00001685	0.00012193	0.00000057	0.00000434	0.00000041	0.00000000	0.00003752	0.00004744	0.00003308	0.00000744	0.00000035	0.00008767	0.00654524	0.00183428	0.01846708	0.00394275	0.00114828	0.00018212	0.00023847	0.00003717	0.00004323	0.00000046
366	NPL-KIOM-256	Rutaceae	Phellodendron	amurense	Rind	0.00000815	0.00000279	0.00000368	0.00001156	0.00002790	0.00003351	0.00011233	0.00045663	0.00496849	0.00000000	0.00001056	0.00000431	0.00001249	0.00000040	0.00000002	0.00000000	0.00000000	0.00000006	0.00000702	0.00000000	0.00000017	0.00000008	0.00000057	0.00000095	0.00000039	0.00000190	0.00000291	0.00000002	0.00000077	0.00000641	0.00000605	0.00001021	0.00007191	0.00156786	0.00018738	0.00318525	0.00015756	0.00000264	0.00102863	0.00000175	0.00000027	0.00007414	0.00003262	0.00001960
367	NPL-KIOM-257	Rutaceae	Phellodendron	chinense	Rind	0.00000610	0.00001101	0.00000353	0.00000209	0.00005259	0.00000624	0.00003751	0.00007986	0.01228977	0.00049857	0.00012799	0.00012519	0.00014128	0.00004734	0.00001389	0.00001716	0.00000663	0.00000783	0.00000592	0.00000493	0.00000295	0.00000557	0.00000322	0.00000263	0.00000022	0.00000158	0.00000142	0.00000053	0.00000026	0.00000338	0.00000229	0.00000024	0.00002795	0.00005360	0.00007415	0.00010909	0.01152960	0.00028275	0.00083194	0.00007755	0.00002754	0.00002104	0.00002272	0.00000445
368	NPL-KIOM-258	Asparagaceae	Polygonatum	sibiricum	Root	0.00000253	0.00000216	0.00000194	0.00000243	0.00000200	0.00000273	0.00000297	0.00000207	0.00000328	0.00000206	0.00000158	0.00000364	0.00000330	0.00000255	0.00000171	0.00000510	0.00000675	0.00000511	0.00000346	0.00000087	0.00000158	0.00001337	0.00000160	0.00000201	0.00000560	0.00000449	0.00001021	0.00000952	0.00003094	0.00001244	0.00000693	0.00003551	0.00002292	0.00000156	0.00001087	0.00000401	0.00005645	0.00001252	0.00024819	0.00000669	0.00000702	0.00004571	0.00000573	0.00000543
369	NPL-KIOM-259	Asparagaceae	Polygonatum	cyrtonema	Root	0.00000220	0.00000132	0.00000088	0.00000122	0.00000264	0.00000206	0.00000446	0.00000315	0.00000236	0.00000214	0.00000248	0.00000163	0.00000321	0.00000122	0.00000153	0.00000395	0.00000424	0.00000354	0.00001580	0.00000322	0.00000371	0.00001986	0.00000250	0.00000179	0.00000733	0.00001128	0.00000717	0.00001757	0.00002604	0.00001088	0.00000167	0.00000209	0.00000195	0.00000137	0.00000454	0.00000152	0.00000472	0.00000506	0.00035423	0.00000207	0.00000176	0.00001492	0.00000227	0.00000220
370	NPL-KIOM-260	Asparagaceae	Polygonatum	falcatum	Root	0.00000419	0.00000599	0.00000560	0.00000608	0.00000532	0.00000680	0.00000440	0.00000842	0.00000637	0.00000770	0.00000860	0.00000432	0.00000511	0.00000539	0.00000641	0.00000629	0.00000531	0.00000570	0.00001861	0.00000368	0.00000484	0.00000431	0.00000712	0.00000623	0.00000824	0.00001141	0.00000918	0.00001768	0.00000931	0.00000785	0.00000979	0.00000370	0.00000316	0.00000366	0.00000282	0.00000325	0.00000241	0.00000661	0.00023829	0.00000412	0.00000305	0.00000384	0.00000589	0.00000581
371	NPL-KIOM-261	Asparagaceae	Polygonatum	kingianum	Root	0.00000378	0.00000524	0.00000395	0.00000511	0.00000452	0.00000343	0.00000376	0.00000504	0.00000377	0.00000410	0.00000423	0.00000478	0.00000340	0.00000448	0.00000350	0.00000418	0.00000381	0.00000612	0.00003748	0.00000598	0.00000404	0.00000597	0.00000510	0.00000482	0.00001630	0.00002340	0.00000830	0.00003512	0.00000620	0.00000626	0.00000223	0.00000330	0.00000380	0.00000149	0.00000384	0.00000425	0.00000426	0.00000740	0.00020215	0.00000434	0.00000235	0.00000218	0.00000199	0.00000226
372	NPL-KIOM-262	Apiaceae	Foeniculum	vulgare	Seed	0.00001063	0.00001513	0.00000600	0.00000746	0.00000701	0.00056153	0.00000264	0.00000907	0.00001825	0.00000500	0.00001084	0.00001244	0.00000465	0.00000636	0.00000379	0.00000798	0.00002156	0.00000365	0.00000396	0.00000323	0.00000253	0.00000341	0.00000498	0.00000087	0.00000798	0.00000442	0.00004423	0.00000617	0.00000197	0.00000104	0.00000221	0.00000033	0.00000049	0.00003815	0.00000692	0.00001526	0.00000364	0.00000180	0.00070151	0.00000565	0.00000199	0.00002547	0.00000653	0.00004730
373	NPL-KIOM-263	Magnoliaceae	Magnolia	officinalis	Rind	0.00003134	0.00004774	0.00002928	0.00002497	0.00002180	0.00003046	0.00005249	0.00008256	0.00004297	0.00002708	0.00011431	0.00007672	0.00008834	0.00003586	0.00003617	0.00002854	0.00001806	0.00002951	0.00002241	0.00001862	0.00002235	0.00001192	0.00001178	0.00000688	0.00000528	0.00000735	0.00000885	0.00000329	0.00000546	0.00000874	0.00000483	0.00000488	0.00000138	0.00000531	0.00000116	0.00000009	0.00000163	0.00000034	0.00107539	0.00001892	0.00000045	0.00004315	0.00004188	0.00000030
374	NPL-KIOM-264	Magnoliaceae	Magnolia	obovata	Rind	0.00004210	0.00003801	0.00003544	0.00003121	0.00002769	0.00001861	0.00005696	0.00008157	0.00003613	0.00003804	0.00027176	0.00011041	0.00012855	0.00003769	0.00002973	0.00003779	0.00002989	0.00002231	0.00002897	0.00001237	0.00001072	0.00001104	0.00000632	0.00000313	0.00000177	0.00000137	0.00000656	0.00000197	0.00000015	0.00000191	0.00000208	0.00000062	0.00000009	0.00000059	0.00000247	0.00000029	0.00000000	0.00000000	0.00233658	0.00034256	0.00000440	0.00000755	0.00000205	0.00000582
375	NPL-KIOM-265	Pedaliaceae	Sesamum	indicum	Seed	0.00005036	0.00005440	0.00003583	0.00003782	0.00004077	0.00003129	0.00004752	0.00002619	0.00002128	0.00002506	0.00004253	0.00005333	0.00001196	0.00004587	0.00004466	0.00003360	0.00003839	0.00002343	0.00003928	0.00003238	0.00001273	0.00002224	0.00003762	0.00001491	0.00001868	0.00003742	0.00016230	0.00001808	0.00001413	0.00000944	0.00001455	0.00001169	0.00001519	0.00000778	0.00000531	0.00011703	0.00001890	0.00002857	0.00160497	0.00000726	0.00000688	0.00005845	0.00001653	0.00013480
376	NPL-NET-001	Ericaceae	Vaccinium	bracteatum	Leaves	0.00001263	0.00001126	0.00001383	0.00001742	0.00001062	0.00000921	0.00001228	0.00001768	0.00001542	0.00001237	0.00000984	0.00000885	0.00000796	0.00001017	0.00000616	0.00000911	0.00000868	0.00000776	0.00000570	0.00000660	0.00000601	0.00000443	0.00000463	0.00000462	0.00000558	0.00000513	0.00000695	0.00000179	0.00000564	0.00000358	0.00000333	0.00000397	0.00000165	0.00000282	0.00000210	0.00000490	0.00000409	0.00000557	0.00002717	0.00003509	0.00001047	0.00000622	0.00000130	0.00000143
377	NPL-NET-002	Apocynaceae	Cynanchum	wilfordii	Root	0.00001744	0.00001256	0.00001002	0.00000990	0.00000847	0.00001084	0.00001583	0.00002163	0.00001127	0.00000972	0.00000642	0.00000846	0.00000901	0.00000834	0.00000316	0.00000828	0.00001311	0.00002098	0.00000322	0.00000246	0.00000119	0.00000213	0.00000220	0.00000182	0.00000169	0.00000079	0.00001959	0.00000076	0.00000060	0.00000046	0.00000034	0.00000000	0.00000032	0.00000000	0.00000006	0.00000217	0.00000570	0.00000000	0.00057773	0.00000033	0.00000141	0.00012173	0.00000127	0.00000067
378	NPL-NET-003	Apocynaceae	Cynanchum	wilfordii	Root	0.00001926	0.00001355	0.00001514	0.00001496	0.00001283	0.00001432	0.00001028	0.00001165	0.00001185	0.00001443	0.00001133	0.00001818	0.00001207	0.00000627	0.00000471	0.00001292	0.00001382	0.00000667	0.00000413	0.00000403	0.00000615	0.00000228	0.00000733	0.00000291	0.00000372	0.00000142	0.00002967	0.00000262	0.00000064	0.00000142	0.00000095	0.00000087	0.00000142	0.00000029	0.00000000	0.00001362	0.00001699	0.00000009	0.00007467	0.00000015	0.00000249	0.00004319	0.00000026	0.00000732
379	NPL-NET-004	Apocynaceae	Cynanchum	wilfordii	Root	0.00000463	0.00001144	0.00000441	0.00000822	0.00000582	0.00000587	0.00000691	0.00001065	0.00000373	0.00000513	0.00000227	0.00000728	0.00000604	0.00000417	0.00000494	0.00000932	0.00001417	0.00001408	0.00000312	0.00000099	0.00000462	0.00000277	0.00000121	0.00000097	0.00000014	0.00000085	0.00001889	0.00000083	0.00000051	0.00000035	0.00000050	0.00000036	0.00000107	0.00000190	0.00000150	0.00000470	0.00000842	0.00000046	0.00023416	0.00000009	0.00000031	0.00003657	0.00000027	0.00000297
380	NPL-NET-005	Apocynaceae	Cynanchum	wilfordii	Root	0.00001376	0.00001094	0.00000943	0.00000703	0.00000935	0.00001242	0.00001169	0.00001298	0.00001031	0.00001293	0.00001187	0.00000547	0.00000985	0.00001062	0.00000809	0.00002058	0.00001864	0.00002245	0.00000861	0.00000849	0.00001173	0.00000972	0.00000469	0.00000643	0.00000549	0.00000726	0.00002299	0.00001152	0.00000979	0.00000560	0.00000807	0.00000581	0.00000294	0.00000394	0.00000387	0.00001152	0.00001510	0.00000735	0.00063979	0.00000365	0.00000916	0.00004235	0.00000693	0.00003589
381	NPL-NET-006	Apocynaceae	Cynanchum	wilfordii	Root	0.00001593	0.00001627	0.00001552	0.00001247	0.00001296	0.00001131	0.00001683	0.00001553	0.00001294	0.00001289	0.00000947	0.00000639	0.00001282	0.00001624	0.00000865	0.00000802	0.00000764	0.00000950	0.00000765	0.00000817	0.00001000	0.00000699	0.00000527	0.00000629	0.00000458	0.00000495	0.00003401	0.00000135	0.00000234	0.00000295	0.00000061	0.00000305	0.00000105	0.00000157	0.00000079	0.00000874	0.00001737	0.00000067	0.00004192	0.00000047	0.00000042	0.00001358	0.00000004	0.00000376
382	NPL-NET-007	Apocynaceae	Cynanchum	wilfordii	Root	0.00000620	0.00000875	0.00001000	0.00000531	0.00000672	0.00000821	0.00001413	0.00000749	0.00000698	0.00000569	0.00000530	0.00000753	0.00000393	0.00000824	0.00000464	0.00000574	0.00000432	0.00000146	0.00000449	0.00000132	0.00000168	0.00000161	0.00000176	0.00000126	0.00000260	0.00000195	0.00002253	0.00000120	0.00000024	0.00000007	0.00000033	0.00000054	0.00000041	0.00000025	0.00000033	0.00000436	0.00001677	0.00000016	0.00004113	0.00000000	0.00000158	0.00002612	0.00000006	0.00000047
383	NPL-NET-008	Apocynaceae	Cynanchum	wilfordii	Root	0.00001910	0.00001997	0.00002211	0.00001547	0.00001840	0.00001553	0.00001566	0.00001542	0.00001657	0.00001054	0.00001008	0.00001399	0.00001021	0.00001263	0.00001379	0.00000708	0.00000961	0.00000648	0.00000566	0.00001029	0.00000323	0.00000305	0.00000302	0.00000311	0.00000388	0.00000392	0.00006354	0.00002874	0.00000186	0.00000035	0.00000082	0.00000134	0.00000023	0.00000022	0.00000016	0.00001419	0.00008402	0.00000025	0.00007259	0.00000000	0.00000000	0.00000428	0.00000021	0.00000192
384	NPL-NET-009	Apocynaceae	Cynanchum	wilfordii	Root	0.00000870	0.00001417	0.00000624	0.00000582	0.00001026	0.00000735	0.00001127	0.00000916	0.00000589	0.00000280	0.00000524	0.00001301	0.00000533	0.00000719	0.00000566	0.00000713	0.00000384	0.00000385	0.00000680	0.00000202	0.00000786	0.00000452	0.00000242	0.00000516	0.00000464	0.00000240	0.00009055	0.00000211	0.00000241	0.00000108	0.00000388	0.00000197	0.00000299	0.00000024	0.00000183	0.00002416	0.00005688	0.00000393	0.00015296	0.00000031	0.00000252	0.00001022	0.00000069	0.00000502
385	NPL-NET-010	Apocynaceae	Cynanchum	wilfordii	Root	0.00001766	0.00001086	0.00001692	0.00000735	0.00001741	0.00001949	0.00001270	0.00001586	0.00001305	0.00001183	0.00001145	0.00001064	0.00001217	0.00001879	0.00001789	0.00001091	0.00000688	0.00000617	0.00001176	0.00000742	0.00001190	0.00001104	0.00001010	0.00000437	0.00000586	0.00000578	0.00000607	0.00000799	0.00000260	0.00000192	0.00000576	0.00000232	0.00000354	0.00000117	0.00000074	0.00000527	0.00003510	0.00001399	0.00007308	0.00000191	0.00000106	0.00001807	0.00000100	0.00000174
386	NPL-NET-011	Apocynaceae	Cynanchum	wilfordii	Root	0.00001133	0.00000864	0.00000543	0.00000523	0.00000464	0.00000730	0.00000765	0.00000694	0.00000630	0.00000453	0.00000670	0.00000607	0.00000650	0.00000503	0.00000311	0.00001085	0.00000920	0.00000749	0.00000292	0.00000200	0.00000316	0.00000222	0.00000107	0.00000066	0.00000287	0.00000413	0.00002317	0.00000224	0.00000132	0.00000426	0.00000257	0.00000109	0.00000187	0.00000176	0.00000204	0.00000777	0.00001329	0.00000178	0.00013982	0.00000165	0.00000358	0.00006316	0.00000204	0.00001134
387	NPL-NET-012	Apocynaceae	Cynanchum	wilfordii	Root	0.00001339	0.00001077	0.00000711	0.00000354	0.00000968	0.00001038	0.00000874	0.00001184	0.00000995	0.00000879	0.00000528	0.00000444	0.00000295	0.00000676	0.00000588	0.00000777	0.00000938	0.00000870	0.00000303	0.00000631	0.00000440	0.00000320	0.00000107	0.00000352	0.00000188	0.00000036	0.00002183	0.00000141	0.00000092	0.00000096	0.00000022	0.00000047	0.00000006	0.00000035	0.00000008	0.00000393	0.00000666	0.00000047	0.00009331	0.00000000	0.00000000	0.00004503	0.00000000	0.00000066
388	NPL-NET-013	Apocynaceae	Cynanchum	wilfordii	Root	0.00001729	0.00001114	0.00001367	0.00001275	0.00001205	0.00001331	0.00001051	0.00001927	0.00000973	0.00000886	0.00000955	0.00001514	0.00000657	0.00001396	0.00001155	0.00000628	0.00000587	0.00000440	0.00000871	0.00000623	0.00000458	0.00000791	0.00000380	0.00000368	0.00000360	0.00000428	0.00003032	0.00000559	0.00000307	0.00000362	0.00000364	0.00000254	0.00000387	0.00000083	0.00000171	0.00001258	0.00001809	0.00000311	0.00003880	0.00000043	0.00000305	0.00002431	0.00000025	0.00000136
389	NPL-NET-014	Apocynaceae	Cynanchum	wilfordii	Root	0.00000633	0.00000667	0.00000606	0.00000579	0.00000481	0.00000376	0.00000583	0.00000488	0.00000531	0.00000536	0.00000512	0.00000454	0.00000245	0.00000711	0.00000423	0.00000777	0.00000599	0.00000916	0.00000334	0.00000216	0.00000338	0.00000192	0.00000135	0.00000187	0.00000148	0.00000057	0.00002313	0.00000118	0.00000094	0.00000086	0.00000000	0.00000007	0.00000037	0.00000019	0.00000000	0.00000770	0.00001427	0.00000004	0.00010488	0.00000001	0.00000012	0.00005988	0.00000077	0.00000996
390	NPL-NET-015	Apocynaceae	Cynanchum	wilfordii	Root	0.00000726	0.00000731	0.00000616	0.00000545	0.00000359	0.00000418	0.00000316	0.00001001	0.00000362	0.00000547	0.00000255	0.00000218	0.00000283	0.00000475	0.00000300	0.00000140	0.00000052	0.00000278	0.00000143	0.00000043	0.00000072	0.00000045	0.00000041	0.00000046	0.00000061	0.00000052	0.00002524	0.00000045	0.00000019	0.00000001	0.00000006	0.00000000	0.00000000	0.00000000	0.00000000	0.00000426	0.00002317	0.00000000	0.00007791	0.00000000	0.00000004	0.00002647	0.00000000	0.00000000
391	NPL-NET-016	Apocynaceae	Cynanchum	wilfordii	Root	0.00001600	0.00002013	0.00001266	0.00002070	0.00001665	0.00001678	0.00001628	0.00002462	0.00002083	0.00001397	0.00001398	0.00001400	0.00000601	0.00001727	0.00002268	0.00001300	0.00000254	0.00000600	0.00000475	0.00000745	0.00000512	0.00000316	0.00000649	0.00000406	0.00000322	0.00000148	0.00008153	0.00000737	0.00000072	0.00000088	0.00000048	0.00000089	0.00000005	0.00000032	0.00000006	0.00001822	0.00005454	0.00000063	0.00008277	0.00000019	0.00000004	0.00000585	0.00000016	0.00000024
392	NPL-NET-032	Apiaceae	Ostericum	koreanum	Root	0.00000544	0.00000494	0.00000380	0.00000231	0.00000763	0.00000596	0.00000222	0.00000505	0.00000556	0.00000208	0.00000406	0.00000431	0.00000516	0.00000631	0.00000819	0.00000329	0.00002526	0.00000443	0.00000570	0.00000348	0.00000270	0.00001978	0.00002368	0.00000251	0.00002101	0.00000209	0.00001006	0.00000199	0.00001296	0.00000398	0.00000312	0.00000171	0.00000722	0.00000179	0.00000088	0.00000379	0.00003882	0.00003195	0.00012859	0.00085165	0.00000629	0.00006774	0.00005871	0.00001200
393	NPL-NET-033	Araliaceae	Aralia	cordata	Root	0.00003094	0.00002179	0.00002595	0.00002357	0.00002524	0.00001343	0.00002816	0.00004449	0.00002314	0.00006107	0.00002414	0.00002859	0.00002513	0.00003070	0.00001390	0.00002774	0.00005447	0.00001716	0.00001254	0.00001210	0.00000437	0.00000856	0.00001076	0.00000934	0.00000841	0.00000605	0.00001188	0.00000760	0.00000342	0.00000320	0.00000153	0.00000156	0.00000327	0.00000036	0.00000529	0.00001068	0.00012261	0.00014263	0.00125764	0.00003859	0.00000578	0.00007664	0.00001165	0.00000694
394	NPL-NET-034	Apiaceae	Angelica	dahurica	Root	0.00000299	0.00000358	0.00000254	0.00000311	0.00000241	0.00000123	0.00000263	0.00000456	0.00000564	0.00000537	0.00000432	0.00000335	0.00000250	0.00000573	0.00000361	0.00000288	0.00002580	0.00000574	0.00000270	0.00000428	0.00000542	0.00000273	0.00002637	0.00000166	0.00001892	0.00000245	0.00000738	0.00000388	0.00000312	0.00000249	0.00000167	0.00000077	0.00000375	0.00000164	0.00000163	0.00000263	0.00001032	0.00000554	0.00007377	0.00040049	0.00009165	0.00056550	0.00010922	0.00001294
395	NPL-NET-035	Apiaceae	Anthriscus	sylvestris	Root	0.00000671	0.00000472	0.00000348	0.00000358	0.00000416	0.00000651	0.00000603	0.00001984	0.00000659	0.00000476	0.00000669	0.00000410	0.00000622	0.00000429	0.00000462	0.00000283	0.00001819	0.00000364	0.00000437	0.00000334	0.00000653	0.00000391	0.00001300	0.00000212	0.00001328	0.00000161	0.00000363	0.00000242	0.00000349	0.00000155	0.00000094	0.00000149	0.00000292	0.00000035	0.00000142	0.00000293	0.00000394	0.00000491	0.00011142	0.00000246	0.00001358	0.00006824	0.00000278	0.00000558
396	NPL-NET-036	Apiaceae	Angelica	gigas	Root	0.00000537	0.00000608	0.00000449	0.00000657	0.00000562	0.00000450	0.00000771	0.00001236	0.00000563	0.00000485	0.00000457	0.00000597	0.00000595	0.00000724	0.00000548	0.00000378	0.00003127	0.00000587	0.00000309	0.00000358	0.00000148	0.00000138	0.00002071	0.00000102	0.00001708	0.00000123	0.00000885	0.00000217	0.00000181	0.00000038	0.00000031	0.00000039	0.00000094	0.00000022	0.00000027	0.00000453	0.00001582	0.00000422	0.00011283	0.00000018	0.00000356	0.00001212	0.00000943	0.00000337
397	NPL-NET-037	Apiaceae	Angelica	acutiloba	Root	0.00000357	0.00000243	0.00000543	0.00000531	0.00000559	0.00000267	0.00000566	0.00000569	0.00000423	0.00000284	0.00000488	0.00000393	0.00000519	0.00000347	0.00000628	0.00000235	0.00001012	0.00000460	0.00000375	0.00000414	0.00000321	0.00000350	0.00000447	0.00000146	0.00000177	0.00000309	0.00001299	0.00000275	0.00000308	0.00000178	0.00000201	0.00000100	0.00000345	0.00000127	0.00000361	0.00000237	0.00000937	0.00000190	0.00005319	0.00000215	0.00001691	0.00005987	0.00000672	0.00001403
398	NPL-NET-038	Apiaceae	Angelica	sinensis	Root	0.00000336	0.00000264	0.00000287	0.00000219	0.00000447	0.00000286	0.00000175	0.00000697	0.00000222	0.00000245	0.00000167	0.00000093	0.00000171	0.00000271	0.00000306	0.00000160	0.00003025	0.00000147	0.00000316	0.00000106	0.00000096	0.00000063	0.00002746	0.00000058	0.00002804	0.00000060	0.00000446	0.00000028	0.00000066	0.00000010	0.00000003	0.00000000	0.00000015	0.00000009	0.00000012	0.00000090	0.00000214	0.00000023	0.00005475	0.00000010	0.00000004	0.00000648	0.00000010	0.00000186
399	NPL-NET-039	Apiaceae	Levisticum	officinale	Root	0.00000904	0.00000865	0.00001024	0.00000698	0.00000947	0.00000685	0.00000836	0.00003448	0.00001137	0.00000780	0.00000619	0.00000708	0.00000770	0.00000615	0.00000652	0.00000841	0.00004983	0.00000855	0.00000614	0.00001299	0.00000264	0.00000272	0.00003369	0.00000321	0.00003116	0.00000481	0.00001847	0.00000503	0.00000506	0.00000570	0.00000336	0.00000386	0.00000434	0.00000462	0.00000315	0.00000885	0.00001250	0.00000197	0.00023191	0.00000305	0.00000146	0.00007926	0.00001193	0.00001974
400	NPL-NET-040	Apiaceae	Angelica	gigas	Root	0.00001698	0.00001160	0.00001387	0.00001382	0.00001162	0.00001563	0.00001755	0.00002304	0.00001554	0.00000916	0.00000842	0.00000633	0.00000862	0.00001446	0.00000657	0.00000635	0.00002363	0.00000504	0.00000274	0.00000256	0.00000265	0.00000103	0.00001197	0.00000121	0.00000872	0.00000069	0.00000764	0.00000098	0.00000017	0.00000004	0.00000000	0.00000000	0.00000031	0.00000000	0.00000000	0.00000058	0.00000368	0.00000005	0.00020334	0.00000004	0.00000000	0.00001014	0.00000000	0.00000016
401	NPL-NET-041	Apiaceae	Angelica	gigas	Root	0.00000544	0.00000456	0.00000700	0.00000531	0.00000472	0.00000331	0.00000948	0.00001335	0.00000712	0.00000242	0.00000537	0.00000323	0.00000768	0.00000742	0.00000272	0.00000350	0.00001923	0.00000427	0.00000322	0.00000268	0.00000180	0.00000129	0.00001436	0.00000112	0.00001069	0.00000079	0.00000671	0.00000173	0.00000046	0.00000057	0.00000044	0.00000000	0.00000032	0.00000038	0.00000007	0.00000083	0.00001075	0.00000096	0.00016161	0.00000003	0.00000310	0.00001431	0.00000017	0.00000089
402	NPL-NET-042	Asteraceae	Chrysanthemum	cinerariifolium	Flower	0.00000296	0.00000443	0.00000246	0.00000162	0.00000156	0.00000141	0.00000083	0.00000308	0.00000613	0.00000100	0.00000090	0.00001404	0.00000856	0.00000046	0.00000101	0.00000091	0.00001511	0.00001564	0.00004159	0.00000634	0.00000000	0.00000000	0.00000194	0.00000000	0.00000000	0.00000053	0.00000000	0.00000000	0.00000000	0.00000000	0.00000000	0.00000000	0.00000000	0.00000000	0.00000000	0.00000025	0.00000000	0.00000003	0.00102112	0.00000233	0.00000000	0.00000000	0.00000003	0.00000014
403	NPL-NET-043	Loganiaceae	Strychnos	Semen	Seed	0.00002328	0.00002005	0.00001630	0.00001610	0.00001557	0.00001651	0.00001889	0.00001634	0.00001830	0.00001297	0.00001571	0.00001647	0.00001700	0.00001236	0.00001128	0.00001218	0.00001758	0.00001106	0.00000869	0.00000704	0.00000317	0.00000534	0.00000923	0.00000657	0.00000643	0.00000765	0.00000531	0.00001471	0.00000758	0.00000989	0.00000488	0.00000553	0.00001372	0.00001484	0.00001566	0.00000817	0.00000748	0.00001433	0.00014905	0.00000555	0.00000758	0.00000619	0.00000353	0.00000490
404	NPL-NET-044	Caprifoliaceae	Valeriana	officinalis	Root	0.00001262	0.00000793	0.00001176	0.00001065	0.00000880	0.00000792	0.00001698	0.00001410	0.00001238	0.00001540	0.00000594	0.00000677	0.00000921	0.00000920	0.00000998	0.00001103	0.00000963	0.00007227	0.00000916	0.00000829	0.00000509	0.00000605	0.00000413	0.00000521	0.00000648	0.00000336	0.00000582	0.00000350	0.00000595	0.00000657	0.00001172	0.00002325	0.00003274	0.00002760	0.00003980	0.00007441	0.00006667	0.00004789	0.00078076	0.00018047	0.00001734	0.00004588	0.00002926	0.00002950
405	NPL-NPL-001	Ginkgoaceae	Ginkgo	biloba	Leaves	0.00000470	0.00000213	0.00000113	0.00000315	0.00000517	0.00000315	0.00000346	0.00000154	0.00000078	0.00000289	0.00000261	0.00000325	0.00000068	0.00000034	0.00000075	0.00000153	0.00000483	0.00003264	0.00000469	0.00000007	0.00000000	0.00005729	0.00000462	0.00000000	0.00000018	0.00000014	0.00000055	0.00000000	0.00003833	0.00003712	0.00000000	0.00000000	0.00000088	0.00000000	0.00000237	0.00000032	0.00000000	0.00000882	0.00000690	0.00070923	0.00000000	0.00000978	0.00002543	0.00000000
406	NPL-NPL-002	Fabaceae	Sophora	japonica	Flowers	0.00001460	0.00000812	0.00001110	0.00000986	0.00000460	0.00000831	0.00001876	0.00001005	0.00000568	0.00000373	0.00001211	0.00000441	0.00000609	0.00001069	0.00001378	0.00001482	0.00002938	0.00000777	0.00000064	0.00000168	0.00000124	0.00149304	0.00004285	0.00000821	0.00000080	0.00000272	0.00000572	0.00000006	0.00206155	0.00099085	0.00002581	0.00002939	0.00001856	0.00000688	0.00003863	0.00001244	0.00002713	0.00000359	0.00067691	0.00001540	0.00001008	0.00000333	0.00000104	0.00000502
407	NPL-NPL-003	Asteraceae	Senecio	jacobaea		0.00002088	0.00001820	0.00001919	0.00001002	0.00000836	0.00001203	0.00001307	0.00001937	0.00002165	0.00001172	0.00000902	0.00001108	0.00001065	0.00000911	0.00001045	0.00001278	0.00001603	0.00000884	0.00000510	0.00000318	0.00000330	0.00001287	0.00000187	0.00000020	0.00000040	0.00000074	0.00000475	0.00000124	0.00000875	0.00000610	0.00000045	0.00000001	0.00000317	0.00000096	0.00000047	0.00000201	0.00000084	0.00000164	0.00002919	0.00140360	0.00000121	0.00007009	0.00002335	0.00000482
408	NPL-NPL-004	Ranunculaceae	Aconitum	carmichaelii	Root	0.00000382	0.00000446	0.00000158	0.00000242	0.00000179	0.00000241	0.00000386	0.00000116	0.00000078	0.00000215	0.00000160	0.00000242	0.00000287	0.00000529	0.00000441	0.00009490	0.00015401	0.00015247	0.00000060	0.00000047	0.00000136	0.00006513	0.00000033	0.00000017	0.00000003	0.00000123	0.00000068	0.00000127	0.00007855	0.00002825	0.00000024	0.00000197	0.00000093	0.00000209	0.00000416	0.00000380	0.00001589	0.00004478	0.00198267	0.00000369	0.00000768	0.00010007	0.00000434	0.00000205
409	NPL-NPL-005	Ranunculaceae	Aconitum	carmichaelii	Root	0.00001612	0.00001403	0.00001810	0.00000902	0.00002320	0.00001310	0.00001951	0.00001753	0.00001238	0.00000752	0.00001354	0.00001039	0.00001381	0.00001155	0.00001374	0.00002446	0.00003435	0.00005663	0.00000689	0.00001084	0.00001074	0.00007472	0.00000612	0.00000437	0.00000321	0.00000762	0.00001342	0.00000453	0.00008292	0.00004195	0.00000248	0.00000097	0.00000557	0.00000382	0.00000377	0.00000258	0.00001093	0.00001279	0.00093814	0.00000984	0.00000808	0.00012965	0.00000992	0.00000538
410	NPL-NPL-006	Ephedraceae	Ephedra	sinica	Aerial parts	0.00001154	0.00001655	0.00000458	0.00000706	0.00000627	0.00000613	0.00001369	0.00001470	0.00000432	0.00000172	0.00001842	0.00000268	0.00000314	0.00000126	0.00000206	0.00000212	0.00000601	0.00000581	0.00000073	0.00000007	0.00000001	0.00000000	0.00001193	0.00000001	0.00000000	0.00000000	0.00000000	0.00000000	0.00000000	0.00000049	0.00000114	0.00000000	0.00001739	0.00000000	0.00001492	0.00000000	0.00000008	0.00001774	0.00097846	0.00013590	0.00000007	0.00000000	0.00000000	0.00000164
411	NPL-NPL-007	Rutaceae	Phellodendron	amurense	Bark	0.00000606	0.00000525	0.00000309	0.00000376	0.00001684	0.00000077	0.00001901	0.00005611	0.00517657	0.00016023	0.00006857	0.00006794	0.00004837	0.00000755	0.00000794	0.00001340	0.00001048	0.00000567	0.00000452	0.00000025	0.00000041	0.00000071	0.00000029	0.00000000	0.00000000	0.00000087	0.00000000	0.00000000	0.00000000	0.00000070	0.00000019	0.00000000	0.00000012	0.00193341	0.00016505	0.00255069	0.00023310	0.00002464	0.00039681	0.00001350	0.00000006	0.00001870	0.00000291	0.00000000
412	NPL-NPL-008	Rutaceae	Phellodendron	amurense	Bark	0.00000295	0.00000068	0.00000275	0.00000106	0.00001442	0.00000698	0.00004421	0.00026086	0.00247587	0.00000000	0.00005295	0.00000670	0.00000236	0.00000000	0.00000000	0.00000000	0.00000000	0.00000022	0.00000067	0.00000000	0.00000000	0.00000000	0.00000000	0.00000000	0.00000000	0.00000000	0.00000000	0.00000000	0.00000000	0.00000000	0.00000002	0.00000002	0.00002786	0.00087945	0.00006843	0.00142623	0.00000334	0.00000000	0.00023808	0.00051875	0.00000000	0.00001284	0.00002938	0.00000041
413	NPL-NPL-009	Ranunculaceae	Coptis	japonica	Root	0.00000000	0.00000122	0.00000000	0.00000000	0.00006697	0.00000667	0.00004377	0.00028552	0.02201987	0.00773280	0.00018253	0.00008849	0.00007326	0.00001190	0.00004660	0.00028734	0.00000113	0.00000000	0.00000000	0.00000001	0.00000000	0.00002829	0.00004035	0.00013394	0.00000000	0.00001643	0.00000015	0.00000000	0.00000874	0.00018556	0.00001076	0.00000644	0.00000553	0.00021826	0.00622538	0.00171951	0.01909507	0.00157819	0.00066418	0.00001245	0.00017296	0.00000000	0.00002186	0.00000057
414	NPL-NPL-010	Ulmaceae	Ulmus	davidiana	Bark	0.00000188	0.00000080	0.00000044	0.00000101	0.00000085	0.00000165	0.00000151	0.00000119	0.00000214	0.00000112	0.00000110	0.00000163	0.00000599	0.00000431	0.00000318	0.00000229	0.00002566	0.00000606	0.00000319	0.00000206	0.00000006	0.00000663	0.00001781	0.00000000	0.00000213	0.00000339	0.00000016	0.00000011	0.00000012	0.00000030	0.00000002	0.00000000	0.00000014	0.00000000	0.00000394	0.00000003	0.00000332	0.00000108	0.00015165	0.00013933	0.00000001	0.00000000	0.00000000	0.00000013
415	NPL-NPL-011	Araliaceae	Acanthopanax	sessiliflorum	Root and stem	0.00002290	0.00002725	0.00002399	0.00003944	0.00004260	0.00001464	0.00005370	0.00008930	0.00009847	0.00002161	0.00002583	0.00003065	0.00007263	0.00002827	0.00008167	0.00005856	0.00003214	0.00001978	0.00000745	0.00000617	0.00001370	0.00000547	0.00000931	0.00000227	0.00000369	0.00000636	0.00000300	0.00000182	0.00000155	0.00000161	0.00000164	0.00000025	0.00000013	0.00000223	0.00000908	0.00000073	0.00003189	0.00000435	0.00255071	0.00006995	0.00000079	0.00004242	0.00000580	0.00000072
416	NPL-NPL-012	Paeoniaceae	Paeonia	suffriticosa	Root	0.00000397	0.00000598	0.00000578	0.00000712	0.00000757	0.00000734	0.00000844	0.00001143	0.00000622	0.00000343	0.00000679	0.00000249	0.00000291	0.00000483	0.00000318	0.00001428	0.00001039	0.00000196	0.00000119	0.00000164	0.00000184	0.00000091	0.00000018	0.00000063	0.00000050	0.00000062	0.00000079	0.00000004	0.00000039	0.00000024	0.00000023	0.00000002	0.00000102	0.00000000	0.00000000	0.00000000	0.00000711	0.00000000	0.00023747	0.00000000	0.00000000	0.00001193	0.00000000	0.00000007
417	NPL-NPL-013	Paeoniaceae	Paeonia	suffriticosa	Root	0.00001076	0.00001583	0.00001160	0.00001740	0.00000888	0.00001802	0.00001108	0.00001826	0.00000411	0.00000782	0.00000567	0.00000884	0.00000447	0.00000438	0.00000200	0.00000536	0.00000382	0.00000239	0.00000422	0.00000185	0.00000036	0.00000049	0.00000018	0.00000049	0.00000045	0.00000004	0.00000017	0.00000050	0.00000000	0.00000000	0.00000000	0.00000000	0.00000000	0.00000000	0.00000019	0.00000000	0.00000000	0.00000000	0.00024699	0.00000000	0.00000000	0.00000651	0.00000000	0.00000000
418	NPL-NPL-014	Fabaceae	Glycyrrhiza	glabra	Root	0.00000180	0.00000347	0.00000244	0.00000248	0.00000521	0.00000069	0.00000216	0.00000108	0.00000088	0.00000102	0.00000007	0.00000004	0.00000000	0.00000035	0.00000083	0.00007161	0.00000613	0.00000220	0.00000000	0.00000000	0.00000000	0.00018558	0.00000000	0.00000000	0.00000000	0.00000000	0.00000013	0.00000000	0.00019418	0.00014131	0.00000000	0.00000277	0.00001503	0.00000000	0.00002519	0.00000000	0.00001471	0.00000500	0.00040402	0.00000010	0.00000439	0.00000000	0.00000660	0.00009283
419	NPL-NPL-015	Fabaceae	Glycyrrhiza	glabra	Root	0.00000362	0.00000638	0.00000164	0.00000104	0.00000149	0.00000219	0.00000278	0.00000632	0.00000122	0.00000080	0.00000017	0.00000042	0.00000068	0.00000012	0.00000192	0.00005546	0.00000866	0.00000159	0.00000002	0.00000004	0.00000022	0.00013786	0.00000000	0.00000011	0.00000000	0.00000000	0.00000000	0.00000000	0.00015299	0.00010153	0.00000000	0.00000017	0.00000008	0.00000000	0.00000418	0.00000000	0.00000025	0.00000000	0.00031155	0.00000006	0.00000003	0.00000000	0.00002058	0.00010319
420	NPL-NPL-016	Lamiaceae	Scutellaria	baicalensis	Root	0.00000971	0.00000644	0.00000396	0.00000398	0.00000400	0.00000546	0.00000294	0.00000319	0.00000632	0.00000085	0.00000163	0.00000118	0.00000267	0.00001352	0.00000053	0.00000441	0.00000173	0.00000122	0.00000056	0.00000011	0.00000000	0.00000000	0.00000002	0.00000000	0.00000000	0.00000000	0.00000000	0.00000000	0.00000000	0.00000000	0.00000000	0.00000000	0.00000000	0.00000000	0.00000000	0.00000000	0.00000000	0.00000089	0.00020346	0.00000451	0.00006917	0.00000000	0.00001936	0.00000000
421	NPL-NPL-017	Rubiaceae	Uncaria	rhynchophylla	Stem and hooks	0.00002942	0.00003341	0.00002746	0.00002572	0.00002044	0.00001845	0.00001519	0.00002927	0.00004656	0.00001600	0.00002199	0.00002871	0.00003098	0.00001332	0.00001768	0.00001077	0.00001719	0.00001440	0.00000428	0.00001602	0.00000370	0.00000062	0.00000314	0.00000197	0.00000050	0.00000150	0.00000237	0.00000386	0.00000016	0.00000026	0.00000277	0.00000043	0.00000146	0.00000060	0.00000000	0.00000046	0.00000003	0.00000000	0.00043790	0.00004275	0.00000036	0.00000187	0.00000099	0.00000000
422	NPL-NPL-018	Rubiaceae	Uncaria	tomentosa	Stem and hooks	0.00005626	0.00005186	0.00004106	0.00003072	0.00003683	0.00004366	0.00003874	0.00004052	0.00006532	0.00002040	0.00002187	0.00002472	0.00002763	0.00002042	0.00001929	0.00001090	0.00001596	0.00000481	0.00000773	0.00001187	0.00000848	0.00000308	0.00000649	0.00000372	0.00000220	0.00000222	0.00000203	0.00000331	0.00006208	0.00000054	0.00000166	0.00000139	0.00000017	0.00000320	0.00000000	0.00000189	0.00000034	0.00000212	0.00037091	0.00000338	0.00001947	0.00000000	0.00000023	0.00000000
423	NPL-NPL-019	Taxaceae	Taxus	chinensis	Bark	0.00001709	0.00000938	0.00001256	0.00000837	0.00000744	0.00000697	0.00004530	0.00001366	0.00001224	0.00000123	0.00000393	0.00000131	0.00000706	0.00000206	0.00000176	0.00000069	0.00000097	0.00000004	0.00000037	0.00000000	0.00000034	0.00000020	0.00000000	0.00000000	0.00000000	0.00000000	0.00000000	0.00000000	0.00000000	0.00000000	0.00000000	0.00000000	0.00000000	0.00000000	0.00000000	0.00000000	0.00000000	0.00000000	0.00049196	0.00000021	0.00000000	0.00000000	0.00000000	0.00000000
424	NPL-NPL-020	Fabaceae	Genista	monspesulana	Leaves	0.00000043	0.00000091	0.00000012	0.00000026	0.00000010	0.00000010	0.00000026	0.00000356	0.00000000	0.00000032	0.00000000	0.00000000	0.00000000	0.00000003	0.00000017	0.00000000	0.00002679	0.00000979	0.00000013	0.00000000	0.00000000	0.00007362	0.00000000	0.00000000	0.00000002	0.00000000	0.00000000	0.00000000	0.00006322	0.00005404	0.00000000	0.00000000	0.00000015	0.00000000	0.00001605	0.00000874	0.00001159	0.00002343	0.00126216	0.00007942	0.00000340	0.00006882	0.00000368	0.00000820
425	NPL-NPL-021	Fabaceae	Astragalus	membranaceus	Root	0.00001160	0.00000573	0.00001338	0.00000762	0.00000838	0.00000712	0.00000614	0.00000886	0.00001450	0.00000318	0.00000705	0.00000563	0.00000671	0.00000551	0.00000788	0.00000634	0.00000637	0.00000692	0.00000469	0.00000213	0.00001746	0.00006818	0.00000478	0.00000121	0.00000100	0.00000489	0.00001435	0.00000287	0.00007678	0.00002772	0.00000147	0.00000110	0.00000321	0.00000104	0.00000397	0.00000517	0.00000136	0.00000169	0.00054510	0.00000331	0.00000203	0.00010766	0.00003997	0.00006877
426	NPL-NPL-022	Solanaceae	Lycium	chinensis	Fruit	0.00000000	0.00000000	0.00000000	0.00000000	0.00000000	0.00000000	0.00000000	0.00000000	0.00000000	0.00000000	0.00000000	0.00000000	0.00000000	0.00000205	0.00000000	0.00000481	0.00008790	0.00017570	0.00005925	0.00000000	0.00000000	0.00000899	0.00000127	0.00000000	0.00000000	0.00000000	0.00000000	0.00000000	0.00000100	0.00000025	0.00000000	0.00000000	0.00000027	0.00000000	0.00001294	0.00000073	0.00000000	0.00000570	0.00001389	0.00112055	0.00000129	0.00000010	0.00000000	0.00000000
427	NPL-NPL-023	Amaranthaceae	Achyranthes	bidentata	Root	0.00000986	0.00001094	0.00001500	0.00001244	0.00001396	0.00001598	0.00001290	0.00002381	0.00001546	0.00001203	0.00001405	0.00001333	0.00001693	0.00001242	0.00001622	0.00002002	0.00001486	0.00001606	0.00001131	0.00000945	0.00002225	0.00002093	0.00001513	0.00001062	0.00000794	0.00001097	0.00000958	0.00000775	0.00001470	0.00000717	0.00000393	0.00000388	0.00000477	0.00000386	0.00000349	0.00000703	0.00000510	0.00000650	0.00024278	0.00000467	0.00000166	0.00001118	0.00000323	0.00000384
428	NPL-NPL-024	Amaranthaceae	Achyranthes	japonica	Root	0.00001012	0.00001364	0.00000954	0.00001223	0.00001032	0.00001517	0.00001302	0.00001757	0.00001503	0.00001108	0.00000952	0.00001123	0.00000709	0.00001312	0.00001132	0.00002257	0.00001237	0.00001034	0.00001344	0.00001168	0.00002207	0.00001584	0.00001165	0.00001744	0.00001342	0.00000955	0.00001094	0.00000989	0.00001673	0.00001735	0.00000776	0.00000596	0.00000725	0.00000419	0.00000964	0.00000806	0.00000671	0.00001113	0.00023216	0.00000152	0.00000412	0.00001414	0.00000664	0.00000516
429	NPL-NPL-025	Amaranthaceae	Cyathula	officinalis	Root	0.00000782	0.00001130	0.00001452	0.00000903	0.00000942	0.00001314	0.00001090	0.00001409	0.00000901	0.00001005	0.00000864	0.00001050	0.00001037	0.00001387	0.00001785	0.00001810	0.00001467	0.00003059	0.00000881	0.00000905	0.00001414	0.00001575	0.00001371	0.00000912	0.00001095	0.00001442	0.00001871	0.00000825	0.00001645	0.00000928	0.00000972	0.00002036	0.00002431	0.00000662	0.00002764	0.00001271	0.00003460	0.00001853	0.00037350	0.00000702	0.00000503	0.00000378	0.00000481	0.00000453
430	NPL-NPL-026	Aquifoliaceae	Ilex	aquifolium	Leaves	0.00001857	0.00001937	0.00001985	0.00002193	0.00002347	0.00002044	0.00002706	0.00002726	0.00003977	0.00001850	0.00001935	0.00003459	0.00003020	0.00001864	0.00002035	0.00003177	0.00002254	0.00001237	0.00001455	0.00000883	0.00000747	0.00000565	0.00000547	0.00000939	0.00000629	0.00000581	0.00000580	0.00000216	0.00000091	0.00000075	0.00000084	0.00000090	0.00000335	0.00000041	0.00000210	0.00000041	0.00000396	0.00000021	0.00090512	0.00002079	0.00000020	0.00000159	0.00000139	0.00000014
431	NPL-NPL-027	Malvaceae	Adansonia	digitata	Fruit and leaves	0.00002572	0.00003528	0.00002570	0.00003079	0.00002336	0.00002452	0.00002995	0.00002582	0.00003104	0.00003043	0.00002541	0.00003392	0.00003333	0.00002585	0.00002565	0.00002089	0.00002399	0.00002509	0.00002661	0.00001543	0.00001896	0.00001623	0.00001524	0.00001200	0.00002380	0.00001509	0.00001349	0.00001298	0.00001505	0.00001698	0.00001377	0.00001235	0.00001286	0.00000949	0.00000897	0.00001131	0.00000568	0.00000390	0.00000360	0.00000783	0.00000378	0.00001868	0.00025272	0.00000772
432	NPL-NPL-028	Campanulaceae	Codonopsis	pilosula	Root	0.00001615	0.00001612	0.00002174	0.00001439	0.00001423	0.00001283	0.00001525	0.00002198	0.00001206	0.00001694	0.00001797	0.00001561	0.00001505	0.00002060	0.00001974	0.00002211	0.00002969	0.00003464	0.00001449	0.00001855	0.00001229	0.00001126	0.00000625	0.00000803	0.00000507	0.00000357	0.00001154	0.00001120	0.00000688	0.00000361	0.00000223	0.00000337	0.00000346	0.00000185	0.00000484	0.00000256	0.00000386	0.00000152	0.00043521	0.00000955	0.00000124	0.00000792	0.00000293	0.00000328
433	NPL-NPL-029	Apocynaceae	Catharanthus	roseus	Leaves	0.00000962	0.00000197	0.00000148	0.00000328	0.00000240	0.00000238	0.00000145	0.00000123	0.00000201	0.00000646	0.00000016	0.00000047	0.00000032	0.00000506	0.00000168	0.00000031	0.00000260	0.00000670	0.00000019	0.00000000	0.00000000	0.00000004	0.00000004	0.00000000	0.00000000	0.00000000	0.00000014	0.00000000	0.00000000	0.00000000	0.00000000	0.00000000	0.00000000	0.00000000	0.00000000	0.00000000	0.00000353	0.00000219	0.00046497	0.00001262	0.00000000	0.00000018	0.00000000	0.00000001
434	NPL-NPL-031	Poaceae	Zea	mays	Seed	0.00002129	0.00003755	0.00002702	0.00003068	0.00002370	0.00001779	0.00002793	0.00014595	0.00004626	0.00002547	0.00002289	0.00002330	0.00002333	0.00002669	0.00003207	0.00001876	0.00002619	0.00003455	0.00002279	0.00001867	0.00001736	0.00005796	0.00001348	0.00001354	0.00001534	0.00001104	0.00006292	0.00001201	0.00008123	0.00003866	0.00001608	0.00001640	0.00001682	0.00000391	0.00007748	0.00003215	0.00007056	0.00002152	0.00079168	0.00002453	0.00001864	0.00012775	0.00001399	0.00005776
435	NPL-NPL-032	Asteraceae	Calendula	arvensis	Flower	0.00000032	0.00000016	0.00000023	0.00000024	0.00000129	0.00000005	0.00000000	0.00000000	0.00000013	0.00000000	0.00000000	0.00000000	0.00000000	0.00000000	0.00000003	0.00000378	0.00002308	0.00001050	0.00000028	0.00000000	0.00000000	0.00007693	0.00000001	0.00000000	0.00000000	0.00000000	0.00000073	0.00000000	0.00007583	0.00006643	0.00000000	0.00000000	0.00000920	0.00000000	0.00001909	0.00000371	0.00000526	0.00001639	0.00001486	0.00036990	0.00000847	0.00000768	0.00004103	0.00001171
436	NPL-NPL-033	Moraceae	Morus	alba	Leaves	0.00000138	0.00000529	0.00000190	0.00000128	0.00000219	0.00000023	0.00000636	0.00000121	0.00000040	0.00000009	0.00000011	0.00000016	0.00000049	0.00000018	0.00000021	0.00000032	0.00000452	0.00000000	0.00000005	0.00000000	0.00000000	0.00012418	0.00000000	0.00000000	0.00000009	0.00000030	0.00000000	0.00000000	0.00011816	0.00010109	0.00000000	0.00000000	0.00000087	0.00000000	0.00000418	0.00000000	0.00000061	0.00000000	0.00039492	0.00000000	0.00000000	0.00000000	0.00002833	0.00027136
437	NPL-NPL-034	Moraceae	Morus	alba	Leaves	0.00001600	0.00001432	0.00001267	0.00000747	0.00001289	0.00002161	0.00001146	0.00001734	0.00002750	0.00001585	0.00000469	0.00001328	0.00002649	0.00002096	0.00002074	0.00001695	0.00001496	0.00001447	0.00000794	0.00000696	0.00000526	0.00045850	0.00000512	0.00001671	0.00000174	0.00000681	0.00002313	0.00000108	0.00057108	0.00035964	0.00000385	0.00000293	0.00000644	0.00000355	0.00000372	0.00001180	0.00000289	0.00000258	0.00141373	0.00000930	0.00000184	0.00000342	0.00000682	0.00001295
438	NPL-NPL-037	Boraginaceae	Arnebia	euchroma	Root	0.00007303	0.00008599	0.00009710	0.00009398	0.00012551	0.00013555	0.00012868	0.00018077	0.00029301	0.00010046	0.00006377	0.00012066	0.00014182	0.00013304	0.00009390	0.00013355	0.00010200	0.00016922	0.00011978	0.00008065	0.00012412	0.00007596	0.00011322	0.00010846	0.00006857	0.00009268	0.00012226	0.00007206	0.00005489	0.00003227	0.00007343	0.00006228	0.00006074	0.00009793	0.00007836	0.00006935	0.00012491	0.00008830	0.00006788	0.00392931	0.00008922	0.00012483	0.00010512	0.00012245
439	NPL-NPL-038	Asteraceae	Synurus	deltoides	Leaves	0.00001291	0.00001570	0.00001658	0.00001637	0.00000903	0.00000898	0.00006468	0.00001915	0.00004755	0.00000761	0.00001661	0.00001115	0.00012428	0.00001442	0.00000574	0.00000150	0.00000658	0.00000471	0.00000431	0.00000187	0.00000133	0.00016724	0.00000057	0.00000339	0.00000569	0.00000317	0.00000053	0.00000167	0.00015073	0.00014607	0.00000006	0.00000024	0.00000011	0.00000149	0.00000135	0.00000018	0.00000035	0.00000076	0.00055674	0.00000028	0.00000013	0.00000000	0.00000105	0.00000039
440	NPL-NPL-039	Fabaceae	Millettia	saptholobi	Stem	0.00003462	0.00003965	0.00002443	0.00002809	0.00002289	0.00002620	0.00002164	0.00003470	0.00008043	0.00001380	0.00004587	0.00002181	0.00001153	0.00001098	0.00000543	0.00001019	0.00001071	0.00000992	0.00000607	0.00000423	0.00000441	0.00000245	0.00003403	0.00000248	0.00000329	0.00000058	0.00000789	0.00000356	0.00000845	0.00000351	0.00000597	0.00000028	0.00000292	0.00000016	0.00000029	0.00000238	0.00000170	0.00000077	0.00085612	0.00000343	0.00000000	0.00000650	0.00000432	0.00000710
441	NPL-NPL-040	Apocynaceae	Hoodia	gordonii	Stem	0.00000962	0.00000570	0.00000760	0.00000592	0.00000723	0.00000769	0.00000969	0.00001711	0.00000654	0.00000305	0.00000524	0.00000675	0.00000518	0.00000944	0.00000164	0.00000887	0.00000644	0.00001329	0.00000409	0.00000438	0.00000783	0.00009755	0.00000580	0.00000401	0.00000649	0.00001275	0.00000889	0.00001103	0.00011206	0.00008198	0.00000266	0.00000079	0.00000277	0.00000339	0.00000268	0.00000885	0.00000844	0.00000511	0.00071751	0.00015285	0.00000055	0.00001024	0.00000386	0.00002434
442	NPL-NPL-041	Lamiaceae	Orthosiphon	stamineus	Leaves	0.00000630	0.00000595	0.00000333	0.00000499	0.00000340	0.00001214	0.00000682	0.00000864	0.00006319	0.00000635	0.00000155	0.00000526	0.00000072	0.00000417	0.00000412	0.00000136	0.00000789	0.00000354	0.00000006	0.00000137	0.00000040	0.00000015	0.00000028	0.00000000	0.00000156	0.00000051	0.00000000	0.00000004	0.00000132	0.00000000	0.00000009	0.00000000	0.00000053	0.00000000	0.00000020	0.00001680	0.00000023	0.00000296	0.00015248	0.00220346	0.00000000	0.00002797	0.00000047	0.00000572
443	NPL-NPL-042	Polygalaceae	Polygala	tenuifolia	Root	0.00000467	0.00000431	0.00000422	0.00000247	0.00000450	0.00000532	0.00000224	0.00000957	0.00000092	0.00000063	0.00000048	0.00000180	0.00000099	0.00000017	0.00000024	0.00000060	0.00000111	0.00000015	0.00000035	0.00000000	0.00000000	0.00001272	0.00000000	0.00000000	0.00000000	0.00000000	0.00000000	0.00000000	0.00000109	0.00000258	0.00000000	0.00000000	0.00000000	0.00000000	0.00000000	0.00000000	0.00000000	0.00000000	0.00058586	0.00000000	0.00000000	0.00000000	0.00000000	0.00043070
444	NPL-NPL-043	Polygalaceae	Polygala	tenuifolia	Root	0.00000776	0.00000579	0.00000784	0.00000601	0.00000556	0.00000615	0.00000486	0.00001174	0.00000089	0.00000161	0.00000139	0.00000053	0.00000056	0.00000082	0.00000015	0.00000166	0.00000295	0.00000102	0.00000003	0.00000006	0.00000000	0.00001263	0.00000000	0.00000000	0.00000000	0.00000000	0.00000000	0.00000000	0.00000204	0.00000354	0.00000000	0.00000000	0.00000000	0.00000000	0.00000000	0.00000000	0.00000000	0.00000000	0.00047612	0.00000751	0.00000000	0.00000000	0.00000000	0.00036925
445	NPL-NPL-044	Apiaceae	Angelica	acutiloba	Root	0.00000759	0.00000662	0.00000661	0.00000557	0.00000545	0.00000840	0.00000518	0.00001263	0.00000511	0.00000411	0.00000393	0.00000746	0.00000408	0.00000840	0.00000502	0.00001044	0.00003905	0.00002157	0.00000663	0.00000416	0.00000210	0.00000416	0.00000986	0.00000129	0.00000605	0.00000501	0.00000286	0.00000127	0.00000116	0.00000159	0.00000045	0.00000071	0.00000072	0.00000024	0.00000067	0.00000305	0.00000392	0.00000267	0.00000143	0.00019847	0.00000035	0.00008495	0.00001684	0.00000058
446	NPL-NPL-045	Schisandraceae	Schisandra	chinensis	Fruit	0.00001399	0.00001572	0.00002979	0.00001433	0.00001123	0.00001143	0.00000919	0.00001568	0.00001276	0.00000782	0.00001154	0.00002349	0.00027274	0.00083608	0.00004132	0.00002495	0.00017068	0.00011638	0.00007007	0.00038429	0.00000679	0.00008815	0.00000534	0.00000448	0.00000311	0.00000152	0.00000069	0.00000076	0.00007109	0.00008844	0.00000070	0.00000170	0.00000021	0.00000058	0.00000196	0.00000001	0.00000028	0.00000028	0.00000012	0.00000019	0.00000002	0.00000012	0.00022737	0.00058225
447	NPL-NPL-046	Asteraceae	Chrysanthemum	indicum	Flower	0.00000944	0.00000952	0.00000540	0.00000467	0.00000599	0.00000710	0.00000650	0.00000596	0.00000388	0.00000362	0.00000338	0.00000320	0.00000324	0.00000747	0.00001726	0.00001999	0.00003555	0.00002067	0.00000187	0.00000013	0.00000010	0.00003020	0.00000020	0.00000027	0.00000001	0.00000000	0.00000096	0.00000000	0.00001849	0.00001699	0.00000000	0.00000000	0.00000000	0.00000000	0.00000029	0.00000019	0.00000000	0.00000000	0.00104336	0.00023671	0.00000000	0.00000802	0.00000000	0.00000001
448	NPL-NPL-047	Rhamnaceae	Zizyphus	jojoba	Fruit	0.00004698	0.00002498	0.00001876	0.00003059	0.00002127	0.00002157	0.00004178	0.00003931	0.00004755	0.00003007	0.00004309	0.00004738	0.00004456	0.00004362	0.00002251	0.00003485	0.00002678	0.00003342	0.00002410	0.00001483	0.00001695	0.00001503	0.00002951	0.00000871	0.00001395	0.00000809	0.00001913	0.00001701	0.00001606	0.00002004	0.00000865	0.00001212	0.00001008	0.00001304	0.00001995	0.00006355	0.00003578	0.00002944	0.00280044	0.00003194	0.00002908	0.00006870	0.00002055	0.00002327
449	NPL-NPL-048	Apiaceae	Ligusticum	striatum	Root	0.00000173	0.00000143	0.00000052	0.00000098	0.00000004	0.00000125	0.00000042	0.00002873	0.00000201	0.00000017	0.00000040	0.00000015	0.00000036	0.00001175	0.00000006	0.00000020	0.00004533	0.00000369	0.00000020	0.00000000	0.00000013	0.00000015	0.00001702	0.00000000	0.00000860	0.00000678	0.00000028	0.00000000	0.00000001	0.00000000	0.00000000	0.00000000	0.00000000	0.00000000	0.00000032	0.00000126	0.00000075	0.00000372	0.00002103	0.00052058	0.00000309	0.00005777	0.00000124	0.00000025
450	NPL-RDA-001	Araliaceae	Panax	ginseng	Root	0.00001793	0.00002060	0.00003217	0.00002841	0.00002225	0.00001459	0.00001630	0.00002314	0.00003683	0.00001943	0.00002725	0.00002489	0.00002444	0.00002269	0.00002084	0.00002258	0.00002668	0.00003499	0.00002303	0.00001993	0.00001660	0.00001958	0.00003638	0.00002819	0.00002682	0.00002633	0.00004800	0.00002852	0.00002700	0.00001085	0.00002866	0.00001256	0.00003412	0.00001434	0.00001555	0.00002291	0.00002063	0.00003266	0.00057709	0.00003054	0.00002240	0.00004587	0.00001541	0.00002586
451	NPL-RDA-002	Zingiberaceae	Zingiber	officinale	Root	0.00001618	0.00001565	0.00001491	0.00001374	0.00001331	0.00001711	0.00000966	0.00002659	0.00000569	0.00001353	0.00000882	0.00001047	0.00001355	0.00001645	0.00001074	0.00002472	0.00005655	0.00005184	0.00001539	0.00000856	0.00000773	0.00001706	0.00004410	0.00000652	0.00003556	0.00001564	0.00003028	0.00001536	0.00001320	0.00001533	0.00000476	0.00002582	0.00002176	0.00000549	0.00002258	0.00002482	0.00002278	0.00001483	0.00123305	0.00002736	0.00000671	0.00003700	0.00000509	0.00002028
452	NPL-RDA-003	Schisandraceae	Schisandra	chinensis	Fruit	0.00002092	0.00001341	0.00001668	0.00002469	0.00001547	0.00000996	0.00000673	0.00000970	0.00001440	0.00001246	0.00000706	0.00000602	0.00007406	0.00024110	0.00002705	0.00001867	0.00006238	0.00004854	0.00003861	0.00018389	0.00000902	0.00010938	0.00005826	0.00000317	0.00000470	0.00000429	0.00000389	0.00000502	0.00008327	0.00020997	0.00000146	0.00000108	0.00000246	0.00001714	0.00000632	0.00000085	0.00000208	0.00000014	0.00000025	0.00000017	0.00000000	0.00000017	0.00055604	0.00004128
453	NPL-RDA-004	Paeoniaceae	Paeonia	lactiflora	Root	0.00000944	0.00000874	0.00001054	0.00001033	0.00001299	0.00000741	0.00001459	0.00003711	0.00001403	0.00000867	0.00000508	0.00000676	0.00000878	0.00000234	0.00000561	0.00000413	0.00000727	0.00000478	0.00000511	0.00000173	0.00000288	0.00000078	0.00000382	0.00000142	0.00000128	0.00000077	0.00000144	0.00000132	0.00000087	0.00000000	0.00000023	0.00000020	0.00000001	0.00000000	0.00000021	0.00000001	0.00001261	0.00000015	0.00019372	0.00000010	0.00000000	0.00000135	0.00000000	0.00000000
454	NPL-RDA-005	Asteraceae	Atractylodes	macrocephala	Root	0.00000584	0.00000445	0.00000805	0.00001032	0.00000831	0.00000710	0.00000738	0.00000623	0.00000623	0.00000697	0.00000641	0.00000787	0.00000623	0.00000726	0.00001095	0.00001316	0.00001107	0.00001411	0.00000607	0.00000681	0.00000596	0.00000754	0.00000846	0.00000400	0.00000524	0.00000654	0.00001888	0.00000343	0.00000344	0.00000323	0.00000312	0.00000440	0.00001013	0.00000199	0.00000402	0.00000307	0.00000396	0.00000348	0.00017351	0.00000314	0.00000209	0.00000152	0.00000494	0.00001326
455	NPL-RDA-006	Asteraceae	Artemisia	iwayomogi	Leaves	0.00001984	0.00001411	0.00001617	0.00001620	0.00001912	0.00001427	0.00000976	0.00002454	0.00001910	0.00000877	0.00000970	0.00002362	0.00000592	0.00001507	0.00001273	0.00001375	0.00001281	0.00000868	0.00000414	0.00000132	0.00000577	0.00001988	0.00000010	0.00000048	0.00000040	0.00000033	0.00000005	0.00000041	0.00000737	0.00000620	0.00000000	0.00000000	0.00000000	0.00000025	0.00000179	0.00000000	0.00000014	0.00000000	0.00127208	0.00000095	0.00000000	0.00000065	0.00000000	0.00000000
456	NPL-RDA-007	Campanulaceae	Codonopsis	lanceolata	Root	0.00000788	0.00000767	0.00000971	0.00000988	0.00000912	0.00000887	0.00001010	0.00001331	0.00001092	0.00000986	0.00000816	0.00001310	0.00001069	0.00000917	0.00000995	0.00001053	0.00000884	0.00002208	0.00000643	0.00000858	0.00000454	0.00003108	0.00000360	0.00000341	0.00000332	0.00000540	0.00000849	0.00000498	0.00002771	0.00001469	0.00000365	0.00000267	0.00000260	0.00000240	0.00000322	0.00000330	0.00001183	0.00000397	0.00034610	0.00000483	0.00000166	0.00001747	0.00000597	0.00000129
457	NPL-RDA-008	Apiaceae	Angelica	gigas	Root	0.00000723	0.00000631	0.00000352	0.00000557	0.00000298	0.00000362	0.00001319	0.00001214	0.00000530	0.00000533	0.00000580	0.00000491	0.00000458	0.00000417	0.00000295	0.00000474	0.00000653	0.00000231	0.00000152	0.00000430	0.00000098	0.00000144	0.00000384	0.00000041	0.00000223	0.00000105	0.00000746	0.00000169	0.00000064	0.00000031	0.00000007	0.00000008	0.00000109	0.00000000	0.00000051	0.00000112	0.00002397	0.00000900	0.00044815	0.00000005	0.00000015	0.00000443	0.00000030	0.00000915
458	NPL-RDA-009	Apiaceae	Cnidium	officinale	Root	0.00001783	0.00001150	0.00001268	0.00000840	0.00000802	0.00000906	0.00000598	0.00004508	0.00000799	0.00000633	0.00000675	0.00001230	0.00000758	0.00000550	0.00000820	0.00000609	0.00002801	0.00000265	0.00000264	0.00000571	0.00000393	0.00000301	0.00002538	0.00000209	0.00002371	0.00000784	0.00000684	0.00000231	0.00000102	0.00000186	0.00000112	0.00000057	0.00000073	0.00000075	0.00000084	0.00000304	0.00002069	0.00000215	0.00037093	0.00000005	0.00000006	0.00009019	0.00000094	0.00000459
459	NPL-RDA-010	Asteraceae	Artemisia	argyi	Leaves	0.00000167	0.00000061	0.00000011	0.00000047	0.00000448	0.00000037	0.00000016	0.00000028	0.00001395	0.00000000	0.00000000	0.00002424	0.00000256	0.00000002	0.00000000	0.00000222	0.00002700	0.00000032	0.00000000	0.00000000	0.00000000	0.00000000	0.00003820	0.00000000	0.00000000	0.00000190	0.00000012	0.00000000	0.00000000	0.00000000	0.00000000	0.00000000	0.00000000	0.00000437	0.00000000	0.00000015	0.00000000	0.00000000	0.00058567	0.00000000	0.00000000	0.00000000	0.00000000	0.00000000
460	NPL-RDA-011	Araliaceae	Acanthopanax	senticosus	Root and stem	0.00004299	0.00002941	0.00006451	0.00006004	0.00005796	0.00005210	0.00003828	0.00004699	0.00003602	0.00003975	0.00009287	0.00006318	0.00006275	0.00006614	0.00002896	0.00004226	0.00004449	0.00004512	0.00003449	0.00002903	0.00005296	0.00002545	0.00003813	0.00004530	0.00003630	0.00005023	0.00004504	0.00003972	0.00001941	0.00002535	0.00001321	0.00001718	0.00002093	0.00002385	0.00003984	0.00003204	0.00005358	0.00007155	0.00017486	0.00264919	0.00000788	0.00005460	0.00002874	0.00002375
461	NPL-RDA-012	Amaranthaceae	Achyranthes	japonica	Root	0.00001803	0.00001816	0.00001640	0.00001731	0.00001230	0.00001889	0.00002257	0.00002029	0.00002196	0.00001404	0.00001401	0.00001388	0.00001614	0.00001799	0.00001948	0.00001383	0.00001810	0.00002140	0.00001889	0.00001655	0.00001828	0.00001674	0.00001465	0.00002485	0.00002108	0.00001468	0.00001573	0.00001260	0.00001287	0.00001598	0.00001314	0.00001397	0.00000986	0.00001252	0.00000985	0.00000789	0.00000835	0.00001135	0.00014298	0.00034764	0.00001470	0.00001032	0.00000652	0.00000610
462	NPL-RDA-013	Fabaceae	Glycyrrhiza	uralensis	Root	0.00002530	0.00001943	0.00003210	0.00002078	0.00002361	0.00001892	0.00002274	0.00002709	0.00002574	0.00001767	0.00001763	0.00004325	0.00002643	0.00002747	0.00002304	0.00004099	0.00002086	0.00002736	0.00001746	0.00002156	0.00001200	0.00003938	0.00023633	0.00001563	0.00001299	0.00001148	0.00002063	0.00000927	0.00010841	0.00035618	0.00001023	0.00001013	0.00001053	0.00000133	0.00000690	0.00000567	0.00000622	0.00000403	0.00000732	0.00078638	0.00000729	0.00000424	0.00000158	0.00000502
463	NPL-RDA-014	Cornaceae	Cornus	officinalis	Fruit	0.00001619	0.00001780	0.00001648	0.00001915	0.00001990	0.00001841	0.00001492	0.00001996	0.00001080	0.00001540	0.00001911	0.00001180	0.00001359	0.00001547	0.00005010	0.00000937	0.00001653	0.00001777	0.00001353	0.00001280	0.00002062	0.00001096	0.00001340	0.00001581	0.00001245	0.00001540	0.00001348	0.00001416	0.00000652	0.00000871	0.00000756	0.00001031	0.00002116	0.00000890	0.00001321	0.00000780	0.00000819	0.00000771	0.00000532	0.00000515	0.00047974	0.00000823	0.00000845	0.00001417
464	NPL-RDA-015	Zingiberaceae	Curcuma	longa	Rhizome	0.00002873	0.00001958	0.00002328	0.00002099	0.00002044	0.00002794	0.00003068	0.00005318	0.00002540	0.00002508	0.00001733	0.00002598	0.00002330	0.00003046	0.00001814	0.00005144	0.00009453	0.00003400	0.00001496	0.00001782	0.00001133	0.00002158	0.00007352	0.00001457	0.00003737	0.00004772	0.00001820	0.00001214	0.00001706	0.00001583	0.00001243	0.00001698	0.00001077	0.00001334	0.00000843	0.00001155	0.00000595	0.00000879	0.00003152	0.00087096	0.00000759	0.00006609	0.00000812	0.00001699
465	NPL-RDA-016	Fabaceae	Astragalus	membranaceus	Root	0.00002320	0.00001887	0.00003483	0.00001308	0.00001250	0.00000936	0.00001024	0.00003611	0.00002142	0.00002007	0.00001212	0.00003365	0.00002168	0.00002740	0.00001655	0.00001512	0.00001842	0.00002031	0.00000868	0.00000431	0.00001295	0.00001225	0.00001468	0.00000527	0.00001287	0.00000108	0.00000412	0.00000260	0.00000461	0.00001817	0.00000084	0.00000175	0.00000505	0.00000110	0.00000158	0.00000040	0.00000498	0.00000336	0.00038874	0.00107552	0.00000332	0.00000056	0.00000257	0.00000027
466	NPL-RDA-017	Asteraceae	Ixeris	strigosa	Leaves	0.00000734	0.00000999	0.00000505	0.00000880	0.00001231	0.00000577	0.00000876	0.00000959	0.00000812	0.00000811	0.00000731	0.00000782	0.00000980	0.00000312	0.00000531	0.00000888	0.00000771	0.00000677	0.00000671	0.00000669	0.00000598	0.00000910	0.00001122	0.00000463	0.00000395	0.00000641	0.00000889	0.00000652	0.00001225	0.00001531	0.00000498	0.00000586	0.00000645	0.00000179	0.00000450	0.00000999	0.00001153	0.00000454	0.00001472	0.00016915	0.00000377	0.00000749	0.00000601	0.00000463
467	NPL-RDA-018	Lamiaceae	Scutellaria	baicalensis	Root	0.00001875	0.00001203	0.00001156	0.00001009	0.00001881	0.00000998	0.00001653	0.00001460	0.00001936	0.00000672	0.00001172	0.00001543	0.00001780	0.00001499	0.00000894	0.00000882	0.00001144	0.00001073	0.00001277	0.00000872	0.00000886	0.00001778	0.00007179	0.00001562	0.00000679	0.00000737	0.00001296	0.00000673	0.00003815	0.00010876	0.00000633	0.00000840	0.00000535	0.00000360	0.00001044	0.00000951	0.00001193	0.00001037	0.00010589	0.00037668	0.00001303	0.00002086	0.00002628	0.00001317
468	NPL-RDA-019	Rosaceae	Rubus	coreanus	Fruit	0.00003489	0.00003983	0.00002390	0.00003452	0.00003657	0.00002386	0.00004582	0.00003161	0.00004825	0.00003115	0.00002198	0.00002806	0.00004095	0.00003424	0.00002518	0.00001397	0.00002408	0.00002756	0.00001539	0.00001019	0.00001355	0.00000708	0.00005189	0.00001871	0.00000955	0.00000693	0.00001595	0.00000343	0.00000441	0.00003208	0.00001153	0.00000089	0.00000358	0.00000060	0.00000045	0.00000378	0.00000601	0.00000707	0.00029123	0.00219321	0.00000541	0.00000851	0.00000378	0.00000515
469	NPL-RDA-020	Araliaceae	Aralia	continentalis	Root	0.00002585	0.00003389	0.00003093	0.00002591	0.00003485	0.00002196	0.00002734	0.00002807	0.00002478	0.00002511	0.00004675	0.00002526	0.00002687	0.00002753	0.00001897	0.00001788	0.00003278	0.00003329	0.00002513	0.00001974	0.00001307	0.00001027	0.00002035	0.00001215	0.00001520	0.00001359	0.00001388	0.00000710	0.00000939	0.00000749	0.00000267	0.00000511	0.00000661	0.00000377	0.00000323	0.00000655	0.00001162	0.00000639	0.00090209	0.00050032	0.00000418	0.00000862	0.00000605	0.00001340
470	NPL-RDA-021	Poaceae	Coix	lacryma-jobi	Seed	0.00013923	0.00012784	0.00014455	0.00013007	0.00020135	0.00017937	0.00015536	0.00015514	0.00013579	0.00013005	0.00006542	0.00014111	0.00010411	0.00008481	0.00013913	0.00015926	0.00010298	0.00006329	0.00013674	0.00011582	0.00021800	0.00020130	0.00018185	0.00016639	0.00011492	0.00008864	0.00012758	0.00011034	0.00016133	0.00012536	0.00011409	0.00013649	0.00010295	0.00009511	0.00013979	0.00013373	0.00015471	0.00017313	0.00222904	0.00095598	0.00012470	0.00016621	0.00014493	0.00020517
471	NPL-RDA-022	Campanulaceae	Platycodon	grandiflorum	Root	0.00001555	0.00001559	0.00001326	0.00001907	0.00001183	0.00001927	0.00001371	0.00002555	0.00002133	0.00001106	0.00001398	0.00002331	0.00002114	0.00001439	0.00001700	0.00001538	0.00002082	0.00003150	0.00001549	0.00001212	0.00001625	0.00002021	0.00001061	0.00000971	0.00001191	0.00000974	0.00001168	0.00001224	0.00000975	0.00001405	0.00001029	0.00000654	0.00001115	0.00000385	0.00000634	0.00000868	0.00001711	0.00000960	0.00013471	0.00017302	0.00000836	0.00000874	0.00000881	0.00000611
472	NPL-RDA-023	Orobanchaceae	Rehmannia	glutinosa	Root	0.00000154	0.00000196	0.00000172	0.00000054	0.00000443	0.00000189	0.00000274	0.00000298	0.00000256	0.00000080	0.00000143	0.00000239	0.00000266	0.00000239	0.00000331	0.00001194	0.00002443	0.00001064	0.00000139	0.00000476	0.00000414	0.00000304	0.00001542	0.00001107	0.00002315	0.00002187	0.00001833	0.00002438	0.00002354	0.00001917	0.00003396	0.00001844	0.00001147	0.00000706	0.00001005	0.00001516	0.00001693	0.00000682	0.00027915	0.00002742	0.00000679	0.00005047	0.00000611	0.00000226
473	NPL-RDA-024	Asteraceae	Carthamus	tinctorius	Flower	0.00000531	0.00000626	0.00000271	0.00000203	0.00000220	0.00000204	0.00002957	0.00000744	0.00000387	0.00000083	0.00000094	0.00000068	0.00000033	0.00000035	0.00000008	0.00000229	0.00004441	0.00000042	0.00000018	0.00000013	0.00000000	0.00017421	0.00003803	0.00000000	0.00001071	0.00000999	0.00000004	0.00000000	0.00014813	0.00016381	0.00000000	0.00000000	0.00000000	0.00000000	0.00000000	0.00000094	0.00000000	0.00000000	0.00000002	0.00133921	0.00002080	0.00018087	0.00010569	0.00006223
474	NPL-RDA-025	Asparagaceae	Liriope	platyphylla	Root	0.00001090	0.00001128	0.00001143	0.00001421	0.00001185	0.00001275	0.00001077	0.00001065	0.00001029	0.00001733	0.00000997	0.00000948	0.00001272	0.00001550	0.00001089	0.00001068	0.00001508	0.00001271	0.00001439	0.00001378	0.00001136	0.00001537	0.00001854	0.00001161	0.00001701	0.00001446	0.00001351	0.00001443	0.00001616	0.00001785	0.00001282	0.00001144	0.00001264	0.00001196	0.00001077	0.00001584	0.00001521	0.00001434	0.00002083	0.00016955	0.00000987	0.00001471	0.00000791	0.00001239
475	NPL-RDA-026	Polygonaceae	Polygonum	multiflorum	Root	0.00001197	0.00002252	0.00001201	0.00001242	0.00001820	0.00001349	0.00001128	0.00001463	0.00002469	0.00001392	0.00001948	0.00002086	0.00001858	0.00001433	0.00000960	0.00001180	0.00001146	0.00000642	0.00000837	0.00001723	0.00000760	0.00000430	0.00001418	0.00001670	0.00000836	0.00001371	0.00001250	0.00001100	0.00001067	0.00000474	0.00000267	0.00000410	0.00000663	0.00000536	0.00000360	0.00000254	0.00000616	0.00000532	0.00053430	0.00003447	0.00000633	0.00000091	0.00000214	0.00001057
476	NPL-RDA-027	Asparagaceae	Polygonatum	sibiricum	Root	0.00001262	0.00001181	0.00001468	0.00001237	0.00001621	0.00001335	0.00001552	0.00001676	0.00001536	0.00001426	0.00001358	0.00001644	0.00001331	0.00001196	0.00001463	0.00001261	0.00001363	0.00001626	0.00001685	0.00001383	0.00001097	0.00003479	0.00001228	0.00001515	0.00001431	0.00001401	0.00001324	0.00001562	0.00003507	0.00002051	0.00000653	0.00000867	0.00000819	0.00000425	0.00000552	0.00000563	0.00001358	0.00000690	0.00014661	0.00000578	0.00000354	0.00000148	0.00000309	0.00000211
477	NPL-RDA-028	Apocynaceae	Cynanchum	wilfordii	Root	0.00001079	0.00000971	0.00000840	0.00000970	0.00000923	0.00000730	0.00000567	0.00000780	0.00000568	0.00000763	0.00000664	0.00000575	0.00000687	0.00000328	0.00000519	0.00000687	0.00000735	0.00001046	0.00000185	0.00000365	0.00000473	0.00000087	0.00000166	0.00000187	0.00000424	0.00000280	0.00006393	0.00000312	0.00000186	0.00000188	0.00000209	0.00000125	0.00000646	0.00000125	0.00000129	0.00000451	0.00007636	0.00000310	0.00050780	0.00000117	0.00000108	0.00006377	0.00000181	0.00002231
478	NPL-SUB-001	Apiaceae	Notopterygium	Rhizoma	Root	0.00000842	0.00001051	0.00000823	0.00000602	0.00000987	0.00000722	0.00001501	0.00012622	0.00001284	0.00000671	0.00001495	0.00001031	0.00001318	0.00001356	0.00001200	0.00000788	0.00006828	0.00001043	0.00000882	0.00000568	0.00000664	0.00000515	0.00003400	0.00000476	0.00003141	0.00000540	0.00000328	0.00000166	0.00000605	0.00000381	0.00000431	0.00000425	0.00000556	0.00000538	0.00000683	0.00000613	0.00002352	0.00001413	0.00066504	0.00004272	0.00005907	0.00055784	0.00032014	0.00001184
479	NPL-SUB-002	Apiaceae	Glehnia	littoralis	Root	0.00003200	0.00002490	0.00002986	0.00005515	0.00004687	0.00004224	0.00003193	0.00006244	0.00004553	0.00002109	0.00002765	0.00003283	0.00003288	0.00002731	0.00003135	0.00003109	0.00009233	0.00005210	0.00004163	0.00003880	0.00003466	0.00004716	0.00006853	0.00003811	0.00010102	0.00003455	0.00006875	0.00003730	0.00002546	0.00002677	0.00003373	0.00003382	0.00005116	0.00001864	0.00004220	0.00003310	0.00008399	0.00002972	0.00168119	0.00003482	0.00003747	0.00005508	0.00005431	0.00006193
480	NPL-SUB-003	Apiaceae	Glehnia	littoralis	Root	0.00002677	0.00001339	0.00002453	0.00002573	0.00002221	0.00001768	0.00002664	0.00002646	0.00003924	0.00003363	0.00002743	0.00002839	0.00002773	0.00003990	0.00001992	0.00001893	0.00007840	0.00004199	0.00003223	0.00002252	0.00003008	0.00002695	0.00008771	0.00002629	0.00006268	0.00002334	0.00004510	0.00003581	0.00001708	0.00002795	0.00003536	0.00001826	0.00005860	0.00001796	0.00001677	0.00004339	0.00010488	0.00002262	0.00160836	0.00005368	0.00002405	0.00007856	0.00005122	0.00003973
481	NPL-SUB-004	Zingiberaceae	Zingiber	Rhizoma	Root	0.00000834	0.00000485	0.00000543	0.00000671	0.00000532	0.00000753	0.00000695	0.00003846	0.00000868	0.00000684	0.00000324	0.00001034	0.00000674	0.00001166	0.00002090	0.00002889	0.00006583	0.00009204	0.00002233	0.00000884	0.00000668	0.00000795	0.00002751	0.00000811	0.00003264	0.00000784	0.00002686	0.00001245	0.00000903	0.00000866	0.00001131	0.00002171	0.00001195	0.00000647	0.00003038	0.00001476	0.00002548	0.00004674	0.00221140	0.00001915	0.00000383	0.00003442	0.00002575	0.00002472
482	NPL-SUB-005	Zingiberaceae	Alpinia	officinarum	Root	0.00001831	0.00001768	0.00001752	0.00001464	0.00001490	0.00002076	0.00001325	0.00001984	0.00003464	0.00001810	0.00001456	0.00001523	0.00001314	0.00001233	0.00002293	0.00002151	0.00002062	0.00003277	0.00002535	0.00001860	0.00001679	0.00000929	0.00000896	0.00000558	0.00000912	0.00001816	0.00001126	0.00001567	0.00001297	0.00000713	0.00002237	0.00009842	0.00002029	0.00003139	0.00008965	0.00000347	0.00005979	0.00000591	0.00144473	0.00004181	0.00001024	0.00001261	0.00000533	0.00002399
483	NPL-SUB-006	Apiaceae	Ligusticum	chuanxiong	Root	0.00001607	0.00001396	0.00001130	0.00001027	0.00000837	0.00001336	0.00001132	0.00005973	0.00001801	0.00000879	0.00000915	0.00003696	0.00000783	0.00001011	0.00001110	0.00000820	0.00005678	0.00001116	0.00001329	0.00001085	0.00001158	0.00000640	0.00004279	0.00000465	0.00004055	0.00000347	0.00001529	0.00000642	0.00000258	0.00000256	0.00000317	0.00000264	0.00000298	0.00000126	0.00000398	0.00000357	0.00000308	0.00000197	0.00055198	0.00000327	0.00000131	0.00002809	0.00000142	0.00000223
484	NPL-SUB-007	Polypodiaceae	Drynaria		Root	0.00002279	0.00002231	0.00002682	0.00002220	0.00001970	0.00001886	0.00004425	0.00002498	0.00008762	0.00001880	0.00001347	0.00002712	0.00003669	0.00009511	0.00001564	0.00002701	0.00002210	0.00002084	0.00001524	0.00001766	0.00001504	0.00002268	0.00001203	0.00000801	0.00000661	0.00002072	0.00001281	0.00000903	0.00000978	0.00000685	0.00000783	0.00001197	0.00000747	0.00001307	0.00002943	0.00001698	0.00001823	0.00003107	0.00325243	0.00001101	0.00000310	0.00001686	0.00001935	0.00000620
485	NPL-SUB-008	Cibotiaceae	Cibotium	barometz	Root	0.00002075	0.00003219	0.00003021	0.00002529	0.00003202	0.00002506	0.00004478	0.00004502	0.00016901	0.00008074	0.00008429	0.00007970	0.00048046	0.00336112	0.00010405	0.00006880	0.00005714	0.00004576	0.00001657	0.00000903	0.00001220	0.00009548	0.00002679	0.00001151	0.00001448	0.00000724	0.00000781	0.00000656	0.00009847	0.00009726	0.00001006	0.00001161	0.00000842	0.00001217	0.00003244	0.00005937	0.00007759	0.00006649	0.00017210	0.00090378	0.00004491	0.00004140	0.00006591	0.00009249
486	NPL-SUB-009	Polygonaceae	Fagopyrum	dibotryis	Root	0.00003540	0.00005252	0.00003696	0.00003379	0.00004683	0.00002551	0.00005668	0.00009068	0.00031653	0.00003751	0.00004168	0.00003282	0.00002436	0.00003922	0.00001626	0.00002897	0.00003126	0.00001656	0.00001666	0.00001937	0.00000333	0.00002132	0.00001084	0.00002076	0.00001231	0.00000607	0.00000345	0.00000324	0.00000326	0.00001192	0.00000154	0.00000545	0.00001157	0.00000101	0.00001107	0.00001191	0.00000528	0.00000471	0.00249453	0.00004653	0.00000448	0.00001208	0.00001105	0.00001702
487	NPL-SUB-010	Campanulaceae	Platycodon	grandiflorus	Root	0.00000304	0.00000291	0.00000125	0.00000369	0.00000250	0.00000293	0.00000354	0.00000431	0.00000498	0.00000260	0.00000233	0.00000273	0.00000220	0.00000425	0.00000211	0.00000405	0.00002346	0.00005247	0.00000298	0.00000637	0.00000361	0.00000600	0.00000135	0.00000200	0.00000171	0.00000353	0.00000639	0.00000172	0.00000880	0.00000428	0.00000292	0.00000243	0.00000922	0.00000301	0.00000924	0.00000249	0.00000902	0.00000623	0.00031102	0.00000619	0.00000618	0.00000588	0.00000475	0.00000505
488	NPL-SUB-011	Lamiaceae	Salvia	miltiorrhiza	Root	0.00000285	0.00000191	0.00000352	0.00000126	0.00000218	0.00000212	0.00000126	0.00000125	0.00000727	0.00000143	0.00000392	0.00000972	0.00002274	0.00002134	0.00001432	0.00001346	0.00002923	0.00002336	0.00001042	0.00000746	0.00000655	0.00001540	0.00001330	0.00000464	0.00001597	0.00001009	0.00000980	0.00000561	0.00000822	0.00001069	0.00001113	0.00000668	0.00000691	0.00000681	0.00001254	0.00001423	0.00001254	0.00001109	0.00036363	0.00000306	0.00000129	0.00000370	0.00000499	0.00000395
489	NPL-SUB-012	Lamiaceae	Salvia	miltiorrhiza	Root	0.00000171	0.00000259	0.00000117	0.00000373	0.00000676	0.00000397	0.00000263	0.00000208	0.00000671	0.00000783	0.00000732	0.00001583	0.00001964	0.00001687	0.00001877	0.00001693	0.00003150	0.00002054	0.00001761	0.00000979	0.00001071	0.00001454	0.00001811	0.00000499	0.00001578	0.00001085	0.00000970	0.00001173	0.00001383	0.00001950	0.00001310	0.00000730	0.00001455	0.00000783	0.00001227	0.00001129	0.00001450	0.00000548	0.00028704	0.00000535	0.00000211	0.00000290	0.00000537	0.00000308
490	NPL-SUB-013	Lamiaceae	Salvia	miltiorrhiza	Root	0.00000299	0.00000213	0.00000270	0.00000533	0.00000333	0.00000827	0.00000163	0.00000319	0.00000990	0.00000163	0.00000386	0.00000981	0.00001320	0.00001923	0.00001047	0.00001033	0.00003546	0.00003199	0.00001222	0.00000661	0.00000595	0.00001273	0.00003380	0.00000189	0.00001304	0.00000615	0.00000358	0.00000387	0.00000585	0.00000548	0.00000479	0.00000633	0.00001428	0.00000310	0.00001116	0.00000331	0.00000577	0.00000630	0.00035254	0.00001205	0.00000119	0.00000341	0.00000131	0.00000023
491	NPL-SUB-014	Lamiaceae	Salvia	miltiorrhiza	Root	0.00000506	0.00000442	0.00000793	0.00000383	0.00000503	0.00000832	0.00001234	0.00001677	0.00001374	0.00001066	0.00001349	0.00001215	0.00001401	0.00001748	0.00001094	0.00001100	0.00001429	0.00000998	0.00000655	0.00000525	0.00000471	0.00006037	0.00000757	0.00000637	0.00000402	0.00000938	0.00002707	0.00000585	0.00007145	0.00002693	0.00000498	0.00001202	0.00001525	0.00000800	0.00001032	0.00001179	0.00003609	0.00001992	0.00114183	0.00000265	0.00001301	0.00007849	0.00003014	0.00003556
492	NPL-SUB-015	Apiaceae	Angelica	sinensis	Root	0.00000228	0.00000423	0.00000393	0.00000518	0.00000353	0.00000214	0.00000253	0.00000642	0.00000402	0.00000210	0.00000460	0.00000272	0.00000373	0.00000498	0.00000204	0.00000297	0.00002374	0.00000430	0.00000265	0.00000354	0.00000174	0.00000170	0.00001943	0.00000410	0.00001835	0.00000199	0.00000621	0.00000311	0.00000164	0.00000135	0.00000124	0.00000227	0.00000450	0.00000118	0.00000142	0.00000377	0.00000366	0.00000393	0.00022837	0.00000229	0.00000324	0.00001541	0.00000492	0.00000778
493	NPL-SUB-016	Campanulaceae	Adenophora	remotiflora	Root	0.00000442	0.00001051	0.00000880	0.00000698	0.00000934	0.00001162	0.00000802	0.00002338	0.00000579	0.00000630	0.00000953	0.00001173	0.00000850	0.00002423	0.00000583	0.00001056	0.00001297	0.00000987	0.00001004	0.00000987	0.00000536	0.00000506	0.00000558	0.00000238	0.00000359	0.00000355	0.00000775	0.00000464	0.00000700	0.00000646	0.00000571	0.00000280	0.00000556	0.00000434	0.00000561	0.00000523	0.00000900	0.00000832	0.00036646	0.00000753	0.00000692	0.00001260	0.00000385	0.00000878
494	NPL-SUB-017	Euphorbiaceae	Euphorbia	pekinensis	Root	0.00002347	0.00000702	0.00000702	0.00001582	0.00002029	0.00001093	0.00003538	0.00004062	0.00002572	0.00001201	0.00001594	0.00001954	0.00002347	0.00001841	0.00001927	0.00001860	0.00001002	0.00002378	0.00001055	0.00000833	0.00001034	0.00001769	0.00000355	0.00000885	0.00001154	0.00001128	0.00001794	0.00000649	0.00001729	0.00000846	0.00001007	0.00000492	0.00000810	0.00000998	0.00002334	0.00000764	0.00001029	0.00001450	0.00146440	0.00000719	0.00000708	0.00002039	0.00005178	0.00008137
495	NPL-SUB-018	Polygonaceae	Rheum	palmatum	Root	0.00000721	0.00000703	0.00000648	0.00000443	0.00000615	0.00000765	0.00000255	0.00000855	0.00000909	0.00000486	0.00000739	0.00000629	0.00000629	0.00000721	0.00000452	0.00000467	0.00000830	0.00000769	0.00000589	0.00000547	0.00000266	0.00000874	0.00000642	0.00000569	0.00000388	0.00000679	0.00000962	0.00001163	0.00000820	0.00001400	0.00000684	0.00000682	0.00000988	0.00000700	0.00001121	0.00001619	0.00000869	0.00001118	0.00036681	0.00000758	0.00001112	0.00001787	0.00001144	0.00002736
496	NPL-SUB-019	Apiaceae	Cnidium	officinale	Root	0.00002755	0.00002219	0.00001946	0.00003961	0.00003496	0.00005178	0.00003020	0.00004124	0.00005341	0.00003540	0.00003541	0.00004020	0.00004909	0.00003404	0.00004773	0.00003961	0.00011199	0.00005675	0.00003350	0.00002946	0.00004645	0.00005568	0.00012422	0.00002583	0.00011301	0.00003156	0.00005928	0.00003525	0.00003227	0.00003094	0.00004058	0.00004713	0.00003718	0.00002713	0.00002960	0.00003409	0.00005345	0.00003793	0.00134127	0.00004784	0.00004821	0.00013963	0.00004280	0.00005852
497	NPL-SUB-020	Apiaceae	Angelica	pubescens	Root	0.00000498	0.00000287	0.00000683	0.00000391	0.00000404	0.00000256	0.00000393	0.00001005	0.00000416	0.00000282	0.00000603	0.00000601	0.00000361	0.00000510	0.00000754	0.00000757	0.00003441	0.00000483	0.00000126	0.00000277	0.00000329	0.00000214	0.00002720	0.00000138	0.00002296	0.00000521	0.00000370	0.00000334	0.00000201	0.00000221	0.00000141	0.00000043	0.00000307	0.00000117	0.00000360	0.00000383	0.00000950	0.00001032	0.00027513	0.00000725	0.00001155	0.00002858	0.00000714	0.00001110
498	NPL-SUB-021	Araliaceae	Aralia	cordata	Root	0.00000330	0.00000404	0.00000495	0.00000412	0.00000475	0.00000332	0.00000451	0.00000615	0.00000568	0.00000528	0.00000894	0.00000630	0.00000550	0.00000492	0.00000706	0.00000990	0.00004453	0.00000867	0.00000721	0.00000752	0.00000420	0.00000371	0.00003826	0.00000729	0.00003971	0.00000805	0.00002097	0.00000951	0.00000750	0.00000543	0.00000490	0.00000408	0.00000688	0.00000529	0.00000779	0.00001686	0.00001611	0.00001080	0.00027340	0.00001812	0.00001949	0.00005885	0.00002345	0.00002078
499	NPL-SUB-022	Eucommiaceae	Eucommia	ulmoides	Rind	0.00003318	0.00002334	0.00002847	0.00003288	0.00003944	0.00005063	0.00005333	0.00022899	0.00013970	0.00002775	0.00007298	0.00015663	0.00043574	0.00098785	0.00005125	0.00006100	0.00007834	0.00005140	0.00002401	0.00000856	0.00000911	0.00001201	0.00000526	0.00000603	0.00000697	0.00000191	0.00000717	0.00000819	0.00000664	0.00000416	0.00000228	0.00000331	0.00000564	0.00001009	0.00001515	0.00000316	0.00000315	0.00000442	0.00182406	0.00001055	0.00000204	0.00000918	0.00001003	0.00000308
500	NPL-SUB-023	Dioscoreaceae	Dioscorea	oposita	Root	0.00000587	0.00000532	0.00001107	0.00000711	0.00001605	0.00000931	0.00003330	0.00001783	0.00000705	0.00000978	0.00001079	0.00001506	0.00000959	0.00000863	0.00001099	0.00002838	0.00005097	0.00005864	0.00001751	0.00001964	0.00001371	0.00007872	0.00001859	0.00001032	0.00001177	0.00003036	0.00002925	0.00002479	0.00012138	0.00013836	0.00003936	0.00009540	0.00010685	0.00006215	0.00017933	0.00005577	0.00016684	0.00012686	0.00217763	0.00016793	0.00007257	0.00011375	0.00003840	0.00003117
501	NPL-SUB-024	Poaceae	Imperata	cylindrica	Root	0.00000508	0.00000622	0.00000987	0.00000668	0.00000806	0.00000898	0.00000939	0.00002371	0.00000926	0.00000757	0.00000913	0.00001353	0.00000994	0.00001297	0.00001184	0.00001557	0.00002107	0.00003808	0.00001353	0.00000925	0.00000765	0.00000737	0.00000738	0.00000675	0.00001194	0.00000982	0.00000830	0.00000726	0.00000752	0.00000700	0.00001517	0.00001104	0.00000647	0.00000962	0.00001182	0.00001006	0.00001135	0.00000730	0.00046549	0.00001142	0.00000985	0.00001109	0.00000630	0.00000768
502	NPL-SUB-025	Urticaceae	Boehmeria	nivea	Root	0.00005689	0.00004784	0.00004241	0.00002843	0.00003095	0.00006501	0.00008882	0.00008591	0.00014041	0.00004918	0.00005582	0.00003365	0.00004345	0.00004123	0.00002163	0.00003160	0.00005298	0.00004124	0.00002418	0.00004222	0.00003514	0.00003888	0.00002108	0.00003589	0.00001505	0.00003291	0.00002981	0.00003463	0.00001634	0.00001816	0.00001043	0.00002080	0.00001093	0.00001663	0.00001463	0.00002618	0.00002447	0.00002618	0.00138903	0.00036816	0.00001276	0.00002242	0.00001417	0.00002801
503	NPL-SUB-026	Asteraceae	Aucklandia	lappa	Root	0.00000165	0.00000231	0.00000294	0.00000268	0.00000232	0.00000113	0.00000177	0.00000403	0.00000351	0.00000365	0.00000267	0.00000552	0.00000334	0.00001879	0.00000453	0.00000451	0.00000928	0.00003322	0.00000769	0.00000232	0.00000074	0.00001574	0.00000300	0.00000088	0.00000124	0.00000536	0.00000224	0.00000379	0.00002137	0.00001483	0.00000145	0.00000282	0.00001152	0.00000456	0.00002267	0.00000343	0.00001062	0.00000949	0.00029696	0.00001127	0.00000959	0.00000366	0.00000788	0.00001156
504	NPL-SUB-027	Asteraceae	Saussurea	costus	Root	0.00000821	0.00000633	0.00000634	0.00000710	0.00000313	0.00000648	0.00000309	0.00000834	0.00000875	0.00000424	0.00000345	0.00000808	0.00000510	0.00003016	0.00000876	0.00000678	0.00001189	0.00002529	0.00000390	0.00000273	0.00000250	0.00002916	0.00000267	0.00000335	0.00000434	0.00000798	0.00000528	0.00000070	0.00002382	0.00002049	0.00000127	0.00000520	0.00000348	0.00000176	0.00001022	0.00000271	0.00001133	0.00000256	0.00049717	0.00000389	0.00000271	0.00000332	0.00000400	0.00000354
505	NPL-SUB-028	Menispermaceae	Stephania	tetrandra	Root	0.00002760	0.00002500	0.00002043	0.00002652	0.00003326	0.00002850	0.00003515	0.00004429	0.00002932	0.00001152	0.00001733	0.00001222	0.00002883	0.00003287	0.00001503	0.00003510	0.00002610	0.00003587	0.00002272	0.00002621	0.00003159	0.00007863	0.00002754	0.00004040	0.00002741	0.00001897	0.00002977	0.00002604	0.00006678	0.00003355	0.00001186	0.00001637	0.00001990	0.00001188	0.00006170	0.00002363	0.00003292	0.00003948	0.00283906	0.00003092	0.00001841	0.00001025	0.00004350	0.00002530
506	NPL-SUB-029	Asparagaceae	Ledebouria		Root	0.00000288	0.00000525	0.00000439	0.00000328	0.00000497	0.00000877	0.00000645	0.00001210	0.00000685	0.00000793	0.00000144	0.00000904	0.00000289	0.00000920	0.00000652	0.00001184	0.00006808	0.00002414	0.00000790	0.00000638	0.00000469	0.00024572	0.00004934	0.00000065	0.00003648	0.00001206	0.00000925	0.00000431	0.00025671	0.00021086	0.00000111	0.00000143	0.00000240	0.00000156	0.00000111	0.00000367	0.00000335	0.00000570	0.00045465	0.00000382	0.00000393	0.00004945	0.00000739	0.00000743
507	NPL-SUB-030	Ranunculaceae	Pulsatilla	chinensis	Root	0.00000666	0.00000289	0.00000910	0.00000566	0.00000485	0.00001422	0.00000506	0.00000923	0.00001260	0.00000861	0.00000837	0.00000944	0.00000716	0.00001301	0.00001030	0.00002296	0.00001232	0.00001192	0.00000950	0.00000406	0.00000489	0.00000751	0.00000090	0.00000383	0.00000390	0.00000477	0.00000640	0.00000707	0.00000418	0.00000673	0.00000655	0.00000252	0.00000340	0.00000561	0.00000740	0.00000650	0.00000621	0.00000797	0.00038557	0.00004346	0.00000659	0.00000505	0.00000802	0.00001038
508	NPL-SUB-031	Vitaceae	Ampelopsis	radix	Root	0.00001564	0.00001691	0.00001509	0.00001217	0.00001340	0.00001211	0.00001394	0.00001337	0.00001887	0.00001100	0.00001300	0.00001243	0.00000778	0.00000682	0.00001064	0.00001182	0.00000745	0.00001869	0.00001712	0.00001012	0.00001351	0.00002380	0.00001615	0.00001113	0.00001076	0.00000693	0.00000858	0.00001163	0.00002399	0.00002038	0.00000719	0.00001029	0.00001200	0.00000772	0.00001003	0.00001108	0.00002879	0.00001278	0.00073774	0.00004566	0.00001608	0.00004573	0.00001420	0.00000965
509	NPL-SUB-032	Stemonaceae	Stemona	japonica	Root	0.00000136	0.00000186	0.00000234	0.00000198	0.00000082	0.00000038	0.00000157	0.00000215	0.00000198	0.00000057	0.00000087	0.00000176	0.00000190	0.00000379	0.00000064	0.00000172	0.00000647	0.00000689	0.00000028	0.00000209	0.00000040	0.00000558	0.00000044	0.00000013	0.00000031	0.00000029	0.00000067	0.00000035	0.00000561	0.00000259	0.00000146	0.00000197	0.00000115	0.00000082	0.00000247	0.00000085	0.00000589	0.00000457	0.00021984	0.00000240	0.00000098	0.00000345	0.00000080	0.00000106
510	NPL-SUB-033	Paeoniaceae	Paeonia	lactiflora	Root	0.00002027	0.00002665	0.00001486	0.00002124	0.00002131	0.00002263	0.00001695	0.00001004	0.00001796	0.00001575	0.00002030	0.00001632	0.00001021	0.00003104	0.00000860	0.00001409	0.00001878	0.00000921	0.00000364	0.00000954	0.00000402	0.00000667	0.00000591	0.00000773	0.00000504	0.00000678	0.00001108	0.00000168	0.00000402	0.00000159	0.00000174	0.00000133	0.00000631	0.00000162	0.00000329	0.00000234	0.00000489	0.00000183	0.00095962	0.00000135	0.00000051	0.00000408	0.00000122	0.00000431
511	NPL-SUB-034	Asclepiadaceae	Cynanchum	stauntonii	Root	0.00001550	0.00001844	0.00001317	0.00001209	0.00001248	0.00001471	0.00002531	0.00002271	0.00002021	0.00001400	0.00000829	0.00002161	0.00001368	0.00001794	0.00001586	0.00001814	0.00004297	0.00005154	0.00001544	0.00000704	0.00001363	0.00000341	0.00001958	0.00000511	0.00000556	0.00000716	0.00003035	0.00001257	0.00000185	0.00000498	0.00000471	0.00001298	0.00001100	0.00000304	0.00002629	0.00002024	0.00001362	0.00000525	0.00101356	0.00003340	0.00000937	0.00003956	0.00000269	0.00001456
512	NPL-SUB-035	Apiaceae	Angelica	dahurica	Root	0.00001763	0.00002020	0.00001418	0.00002378	0.00000846	0.00001930	0.00001198	0.00001063	0.00002162	0.00002073	0.00000779	0.00001617	0.00001101	0.00001161	0.00002083	0.00003243	0.00004238	0.00001182	0.00001106	0.00001521	0.00000712	0.00000334	0.00001913	0.00000749	0.00002183	0.00000735	0.00002650	0.00001282	0.00000483	0.00000472	0.00000585	0.00001260	0.00001540	0.00000923	0.00001398	0.00001078	0.00000374	0.00023115	0.00165765	0.00021035	0.00024302	0.00069924	0.00009381	0.00004763
513	NPL-SUB-036	Asteraceae	Atractylodes	macrocephala	Root	0.00000195	0.00000310	0.00000488	0.00000334	0.00000371	0.00000263	0.00000286	0.00000569	0.00000442	0.00000510	0.00000355	0.00000372	0.00000177	0.00001195	0.00000782	0.00002542	0.00004353	0.00005144	0.00000744	0.00000673	0.00000335	0.00000474	0.00000404	0.00000348	0.00000496	0.00000834	0.00001529	0.00001070	0.00000791	0.00000226	0.00000473	0.00000846	0.00001663	0.00000159	0.00001406	0.00000710	0.00002360	0.00001600	0.00050774	0.00003282	0.00003345	0.00001973	0.00000887	0.00002159
514	NPL-SUB-037	Asteraceae	Rhaponticum	uniflorum	Root	0.00001890	0.00001146	0.00004110	0.00002324	0.00003968	0.00004470	0.00002995	0.00002853	0.00003134	0.00003129	0.00003865	0.00002645	0.00003735	0.00004618	0.00002913	0.00002342	0.00004481	0.00003438	0.00002509	0.00002199	0.00002000	0.00005217	0.00002770	0.00001815	0.00002815	0.00001376	0.00002890	0.00002371	0.00006336	0.00005396	0.00002072	0.00001614	0.00001972	0.00002396	0.00002175	0.00005115	0.00003817	0.00004842	0.00443748	0.00074631	0.00003831	0.00003311	0.00002820	0.00005477
515	NPL-SUB-038	Zingiberaceae	Kaempferia	galanga	Root	0.00001338	0.00001575	0.00001041	0.00001528	0.00000879	0.00003732	0.00001597	0.00003253	0.00001590	0.00001217	0.00002566	0.00002617	0.00010728	0.00027161	0.00001347	0.00003850	0.00010223	0.00002461	0.00002451	0.00002734	0.00001483	0.00002148	0.00002208	0.00002360	0.00004498	0.00002013	0.00002545	0.00002540	0.00003007	0.00002722	0.00001898	0.00002795	0.00003687	0.00006872	0.00034339	0.00008862	0.00005166	0.00004369	0.00008084	0.00010181	0.00064397	0.00058543	0.00026591	0.00018811
516	NPL-SUB-039	Dipsacaceae	Dipsacus	asper	Root	0.00000080	0.00000038	0.00000013	0.00000074	0.00000015	0.00000064	0.00000015	0.00000030	0.00005475	0.00000002	0.00000023	0.00000088	0.00000059	0.00000009	0.00000073	0.00000176	0.00000597	0.00002341	0.00005356	0.00001541	0.00000239	0.00001258	0.00000397	0.00000224	0.00000732	0.00000715	0.00002312	0.00003244	0.00001134	0.00001269	0.00001373	0.00001981	0.00004266	0.00004264	0.00007642	0.00003715	0.00002095	0.00002042	0.00025494	0.00001424	0.00002000	0.00000423	0.00000200	0.00000059
517	NPL-SUB-040	Araliaceae	Panax	notoginseng	Root	0.00001250	0.00001523	0.00000730	0.00001327	0.00000810	0.00000657	0.00001487	0.00000827	0.00000924	0.00001112	0.00000884	0.00000731	0.00001056	0.00001076	0.00001292	0.00001349	0.00003786	0.00002178	0.00000990	0.00001007	0.00001067	0.00001011	0.00003282	0.00000681	0.00002691	0.00000976	0.00003295	0.00000915	0.00000652	0.00000823	0.00001030	0.00000714	0.00001702	0.00000583	0.00000999	0.00000835	0.00000820	0.00001077	0.00083072	0.00000515	0.00000576	0.00010303	0.00000835	0.00003466
518	NPL-SUB-041	Araliaceae	Panax	notoginseng	Root	0.00000782	0.00000962	0.00001047	0.00000762	0.00000688	0.00000576	0.00000692	0.00000487	0.00000608	0.00000507	0.00000843	0.00001334	0.00000972	0.00000930	0.00000854	0.00001525	0.00003341	0.00001749	0.00000917	0.00000743	0.00000630	0.00000720	0.00001935	0.00000724	0.00002332	0.00000669	0.00001554	0.00000752	0.00000752	0.00000241	0.00000332	0.00000391	0.00000685	0.00000912	0.00000821	0.00000751	0.00000471	0.00000473	0.00040821	0.00001047	0.00000862	0.00004875	0.00001104	0.00001997
519	NPL-SUB-042	Araliaceae	Panax	notoginseng	Root	0.00000956	0.00000612	0.00001198	0.00001014	0.00000963	0.00000896	0.00000772	0.00000945	0.00000924	0.00000813	0.00000916	0.00000445	0.00000785	0.00001013	0.00001172	0.00000903	0.00002959	0.00001857	0.00000970	0.00001286	0.00000693	0.00001061	0.00001915	0.00000409	0.00002111	0.00000375	0.00002066	0.00000889	0.00000719	0.00000805	0.00000591	0.00000430	0.00000519	0.00000442	0.00000334	0.00000968	0.00000934	0.00000777	0.00053195	0.00000733	0.00000488	0.00004517	0.00000889	0.00001342
520	NPL-SUB-043	Phytolaccaceae	Phytolacca	acinosa	Root	0.00000169	0.00000752	0.00000340	0.00000520	0.00000266	0.00000263	0.00000978	0.00001178	0.00000427	0.00000274	0.00000441	0.00000127	0.00000453	0.00000844	0.00000765	0.00001245	0.00003191	0.00006492	0.00000409	0.00000468	0.00000461	0.00011428	0.00000470	0.00001191	0.00000743	0.00001428	0.00001272	0.00002126	0.00015624	0.00010300	0.00002529	0.00004248	0.00006787	0.00004096	0.00010750	0.00008281	0.00018815	0.00018531	0.00180111	0.00029625	0.00028970	0.00024982	0.00016132	0.00021648
521	NPL-SUB-044	Polygonaceae	Polygonum	multiflorum	Root	0.00001023	0.00000917	0.00001080	0.00001585	0.00001239	0.00001016	0.00009451	0.00001026	0.00000982	0.00000513	0.00000808	0.00000707	0.00000603	0.00000584	0.00001226	0.00001039	0.00000486	0.00000560	0.00000452	0.00000686	0.00001457	0.00000655	0.00006171	0.00005731	0.00002058	0.00006179	0.00001382	0.00000244	0.00000298	0.00000709	0.00000966	0.00004062	0.00001245	0.00002307	0.00001653	0.00001247	0.00005288	0.00001352	0.00164259	0.00004221	0.00002959	0.00006091	0.00001223	0.00001041
522	NPL-SUB-045	Acoraceae	Acorus	tatarinowii	Root	0.00000759	0.00001382	0.00001105	0.00001771	0.00000834	0.00002539	0.00001635	0.00002807	0.00001071	0.00001895	0.00000726	0.00001234	0.00003410	0.00004494	0.00000952	0.00002171	0.00004885	0.00005353	0.00001099	0.00000639	0.00000856	0.00000692	0.00001392	0.00001103	0.00001017	0.00001901	0.00001498	0.00000972	0.00001015	0.00001257	0.00001559	0.00001790	0.00001367	0.00000454	0.00003326	0.00001134	0.00003044	0.00002501	0.00102555	0.00002645	0.00000219	0.00001672	0.00000261	0.00002018
523	NPL-SUB-046	Liliaceae	Ophiopogon	japonicus	Root	0.00000553	0.00000629	0.00000235	0.00000289	0.00000382	0.00000298	0.00000352	0.00000349	0.00000427	0.00000478	0.00000344	0.00000418	0.00000299	0.00000321	0.00000597	0.00000763	0.00001064	0.00001375	0.00000742	0.00000234	0.00000250	0.00001193	0.00000224	0.00000131	0.00000379	0.00000594	0.00000425	0.00000714	0.00001616	0.00000609	0.00000401	0.00000494	0.00000398	0.00000311	0.00000531	0.00000408	0.00000656	0.00000329	0.00018760	0.00000328	0.00000247	0.00000437	0.00000192	0.00000265
524	NPL-SUB-047	Dipsacaceae	Dipsacus	asper	Root	0.00000125	0.00000089	0.00000026	0.00000293	0.00000253	0.00000183	0.00000288	0.00000239	0.00020318	0.00000082	0.00000102	0.00000178	0.00000053	0.00000142	0.00000161	0.00000476	0.00000484	0.00001641	0.00006156	0.00000901	0.00000253	0.00000810	0.00000901	0.00000761	0.00000404	0.00000508	0.00002358	0.00001329	0.00000208	0.00000342	0.00000426	0.00000501	0.00001494	0.00000903	0.00001330	0.00000986	0.00000721	0.00000862	0.00020062	0.00000332	0.00000194	0.00000660	0.00000151	0.00000126
525	NPL-SUB-048	Apiaceae	Bupleurum	chinense	Root	0.00000243	0.00000862	0.00000396	0.00000650	0.00000643	0.00000404	0.00000613	0.00001623	0.00000958	0.00000392	0.00000263	0.00001790	0.00001088	0.00000928	0.00000670	0.00001113	0.00002787	0.00000465	0.00001342	0.00000884	0.00000336	0.00000313	0.00000866	0.00000254	0.00000500	0.00000747	0.00002231	0.00000724	0.00000816	0.00000612	0.00000179	0.00000498	0.00000345	0.00000504	0.00000846	0.00001589	0.00001365	0.00000966	0.00058598	0.00003412	0.00001132	0.00007365	0.00000889	0.00000891
526	NPL-SUB-049	Ranunculaceae	Anemone	raddeana	Root	0.00000622	0.00000875	0.00000452	0.00001129	0.00000934	0.00001170	0.00001307	0.00001078	0.00001572	0.00000765	0.00000950	0.00001005	0.00000785	0.00001038	0.00001523	0.00001182	0.00001082	0.00001798	0.00000898	0.00000949	0.00000626	0.00003470	0.00000389	0.00000682	0.00000544	0.00000582	0.00001645	0.00000894	0.00003280	0.00003832	0.00000505	0.00000435	0.00001391	0.00001160	0.00001562	0.00001337	0.00002385	0.00002530	0.00059391	0.00002505	0.00000627	0.00001536	0.00001160	0.00001567
527	NPL-SUB-050	Schisandraceae	Schisandra	chinensis	Fruit	0.00000886	0.00001172	0.00001621	0.00001057	0.00000364	0.00001487	0.00000619	0.00001279	0.00001843	0.00000328	0.00002208	0.00001896	0.00071286	0.00219597	0.00006268	0.00002716	0.00014584	0.00007597	0.00002362	0.00017241	0.00001275	0.00008952	0.00002461	0.00000297	0.00000601	0.00000148	0.00000615	0.00000524	0.00007038	0.00010798	0.00000388	0.00000335	0.00000654	0.00000645	0.00002290	0.00000390	0.00000853	0.00000472	0.00000483	0.00001263	0.00002716	0.00005452	0.00069304	0.00013708
528	NPL-SUB-051	Zingiberaceae	Curcuma	longa	Root	0.00012665	0.00007837	0.00011858	0.00010337	0.00009697	0.00014139	0.00011180	0.00013724	0.00008263	0.00014151	0.00014724	0.00012550	0.00012198	0.00020137	0.00016036	0.00015815	0.00019545	0.00010469	0.00011954	0.00012382	0.00011839	0.00018840	0.00012693	0.00014422	0.00016286	0.00014175	0.00021211	0.00014036	0.00010063	0.00017322	0.00014692	0.00013507	0.00013550	0.00011891	0.00013384	0.00012713	0.00022403	0.00019280	0.00498713	0.00018027	0.00017657	0.00016450	0.00013570	0.00014974
529	NPL-SUB-052	Asparagaceae	Polygonatum	sibiricum	Root	0.00000422	0.00000289	0.00000513	0.00000564	0.00000494	0.00000645	0.00000470	0.00000464	0.00000442	0.00000685	0.00000351	0.00000523	0.00000563	0.00000315	0.00000461	0.00000345	0.00000839	0.00000742	0.00001326	0.00000774	0.00000461	0.00000854	0.00000613	0.00000669	0.00000600	0.00000759	0.00000963	0.00001304	0.00001398	0.00000802	0.00000584	0.00000636	0.00000427	0.00000380	0.00000528	0.00000389	0.00000380	0.00000758	0.00022430	0.00000743	0.00000433	0.00000856	0.00000611	0.00000824
530	NPL-SUB-053	Amaranthaceae	Achyranthes	bidentata	Root	0.00000224	0.00000252	0.00000407	0.00000360	0.00000398	0.00000266	0.00000281	0.00000483	0.00000564	0.00000507	0.00000511	0.00000437	0.00000114	0.00000239	0.00000440	0.00000958	0.00001422	0.00002257	0.00000545	0.00000443	0.00000640	0.00000582	0.00000596	0.00000384	0.00000448	0.00000525	0.00000924	0.00000670	0.00000799	0.00000598	0.00000596	0.00001466	0.00001297	0.00000234	0.00001706	0.00000996	0.00002501	0.00000856	0.00030984	0.00000876	0.00000431	0.00000476	0.00000430	0.00000959
531	NPL-SUB-054	Amaranthaceae	Achyranthes	bidentata	Root	0.00000323	0.00000349	0.00000226	0.00000262	0.00000329	0.00000275	0.00000521	0.00000461	0.00000329	0.00000335	0.00000328	0.00000153	0.00000333	0.00000752	0.00000303	0.00000684	0.00000545	0.00000931	0.00000520	0.00000301	0.00000979	0.00001074	0.00000462	0.00000313	0.00000649	0.00000592	0.00000717	0.00000417	0.00000754	0.00000482	0.00000627	0.00000842	0.00000778	0.00000318	0.00001211	0.00000635	0.00001425	0.00000780	0.00037017	0.00000534	0.00000426	0.00000286	0.00000347	0.00000625
532	NPL-SUB-055	Amaranthaceae	Achyranthes	bidentata	Root	0.00001448	0.00001591	0.00001156	0.00001745	0.00001577	0.00001464	0.00001515	0.00001791	0.00001546	0.00001323	0.00001235	0.00001327	0.00001543	0.00001689	0.00001548	0.00001838	0.00002054	0.00002042	0.00001340	0.00001176	0.00001396	0.00001235	0.00001210	0.00000998	0.00001475	0.00001218	0.00001376	0.00000802	0.00000708	0.00000686	0.00000734	0.00000899	0.00001173	0.00000248	0.00001167	0.00000944	0.00000906	0.00000759	0.00027168	0.00000762	0.00000304	0.00000235	0.00000221	0.00000219
533	NPL-SUB-056	Polygalaceae	Polygala	tenuifolia	Root	0.00000351	0.00000463	0.00000542	0.00000421	0.00000403	0.00000670	0.00000320	0.00001295	0.00000557	0.00000377	0.00000645	0.00000426	0.00000668	0.00000628	0.00000578	0.00000469	0.00001081	0.00000775	0.00000571	0.00000312	0.00000587	0.00002849	0.00000530	0.00000543	0.00000529	0.00000416	0.00000846	0.00000779	0.00004427	0.00002107	0.00000332	0.00000784	0.00001107	0.00001072	0.00001015	0.00000928	0.00002194	0.00001812	0.00043455	0.00001079	0.00002878	0.00007143	0.00002980	0.00053201
534	NPL-SUB-057	Ranunculaceae	Clematis	chinensis	Root	0.00000378	0.00000405	0.00000441	0.00000627	0.00000470	0.00000712	0.00000663	0.00001870	0.00000729	0.00000701	0.00000454	0.00001579	0.00000666	0.00000977	0.00001237	0.00001304	0.00002004	0.00004242	0.00000734	0.00000525	0.00000373	0.00000476	0.00000254	0.00000381	0.00000186	0.00000274	0.00000421	0.00001005	0.00000994	0.00000463	0.00000429	0.00001246	0.00000993	0.00000615	0.00000524	0.00000565	0.00001651	0.00001455	0.00056703	0.00002875	0.00002841	0.00004045	0.00026410	0.00025499
535	NPL-SUB-058	Caryophyllaceae	Stellaria	media	Root	0.00000531	0.00000310	0.00000654	0.00000311	0.00000705	0.00000541	0.00000434	0.00000359	0.00000384	0.00000272	0.00000309	0.00002004	0.00000467	0.00000534	0.00000273	0.00000388	0.00000501	0.00000742	0.00000196	0.00000228	0.00000120	0.00002506	0.00000437	0.00000499	0.00004907	0.00000774	0.00000259	0.00000552	0.00001944	0.00001239	0.00003849	0.00012450	0.00000704	0.00000108	0.00000166	0.00000072	0.00000033	0.00000014	0.00035048	0.00000383	0.00000192	0.00016213	0.00013013	0.00000713
536	NPL-SUB-059	Araliaceae	Panax	ginseng	Root	0.00000365	0.00000460	0.00000841	0.00000670	0.00000238	0.00000837	0.00000817	0.00000966	0.00000850	0.00000939	0.00000653	0.00000535	0.00000411	0.00000440	0.00000931	0.00000881	0.00002599	0.00001842	0.00000475	0.00000387	0.00000494	0.00000409	0.00001329	0.00000617	0.00000835	0.00000445	0.00002272	0.00000353	0.00000531	0.00000579	0.00000280	0.00000343	0.00001146	0.00000430	0.00000309	0.00000749	0.00000885	0.00000476	0.00079047	0.00000387	0.00000550	0.00013671	0.00000955	0.00002361
537	NPL-SUB-060	Araliaceae	Panax	ginseng	Root	0.00001459	0.00001749	0.00002508	0.00002463	0.00001759	0.00001411	0.00002264	0.00002821	0.00001736	0.00001754	0.00001429	0.00002167	0.00001299	0.00002708	0.00001149	0.00001905	0.00004552	0.00003824	0.00001171	0.00001735	0.00001519	0.00001928	0.00003858	0.00000790	0.00003203	0.00002558	0.00004518	0.00001488	0.00001799	0.00001435	0.00001945	0.00001333	0.00002192	0.00000684	0.00000802	0.00001298	0.00001007	0.00001021	0.00102708	0.00003018	0.00001947	0.00015723	0.00002408	0.00004093
538	NPL-SUB-061	Araliaceae	Panax	ginseng	Root	0.00000453	0.00000532	0.00000339	0.00000398	0.00000572	0.00000284	0.00000566	0.00001019	0.00000701	0.00000562	0.00000459	0.00000212	0.00000334	0.00000668	0.00000524	0.00001078	0.00001291	0.00000636	0.00000473	0.00000389	0.00000426	0.00000627	0.00000596	0.00000459	0.00000289	0.00000417	0.00002253	0.00000324	0.00000199	0.00000137	0.00000142	0.00000085	0.00002144	0.00000184	0.00000426	0.00000616	0.00001135	0.00000535	0.00042371	0.00000283	0.00000428	0.00004873	0.00001095	0.00002219
539	NPL-SUB-062	Araliaceae	Panax	ginseng	Root	0.00001204	0.00001135	0.00001281	0.00001524	0.00001243	0.00000934	0.00001389	0.00001275	0.00001461	0.00001524	0.00001012	0.00001321	0.00001261	0.00001438	0.00000940	0.00001410	0.00002050	0.00001618	0.00001513	0.00000614	0.00000658	0.00001098	0.00001420	0.00000740	0.00001374	0.00001409	0.00002320	0.00000738	0.00000706	0.00000760	0.00000603	0.00000616	0.00001226	0.00000537	0.00000802	0.00000562	0.00001246	0.00000391	0.00037391	0.00000711	0.00000527	0.00003408	0.00000610	0.00001190
540	NPL-SUB-063	Asteraceae	Aster	tataricus	Root	0.00000112	0.00000091	0.00000248	0.00000195	0.00000123	0.00000203	0.00000195	0.00000258	0.00000180	0.00000292	0.00000070	0.00000178	0.00000119	0.00000370	0.00000368	0.00000449	0.00002269	0.00004603	0.00000369	0.00000173	0.00000374	0.00000059	0.00000283	0.00000028	0.00000108	0.00000243	0.00000264	0.00000191	0.00000251	0.00000231	0.00000453	0.00001166	0.00002282	0.00000082	0.00003186	0.00000380	0.00003253	0.00001386	0.00039762	0.00000811	0.00000643	0.00001045	0.00000706	0.00000834
541	NPL-SUB-064	Boraginaceae	Arnebia	euchroma	Root	0.00012063	0.00023654	0.00020296	0.00015445	0.00017469	0.00014780	0.00015501	0.00027658	0.00067416	0.00025225	0.00015462	0.00021751	0.00024248	0.00023885	0.00014145	0.00015672	0.00013926	0.00013847	0.00016808	0.00022049	0.00011785	0.00019185	0.00010981	0.00009532	0.00017246	0.00008285	0.00016118	0.00012661	0.00011581	0.00011525	0.00019259	0.00011746	0.00013770	0.00011568	0.00013031	0.00026795	0.00010680	0.00022438	0.00032503	0.03285630	0.00013478	0.00017999	0.00009455	0.00039942
542	NPL-SUB-065	Paeoniaceae	Paeonia	lactiflora	Root	0.00002112	0.00004248	0.00003898	0.00002097	0.00001450	0.00001233	0.00002410	0.00005121	0.00005699	0.00001582	0.00002119	0.00002749	0.00003018	0.00004762	0.00003143	0.00001286	0.00007061	0.00001746	0.00000253	0.00000541	0.00000394	0.00000595	0.00004151	0.00000432	0.00003233	0.00000791	0.00000691	0.00000331	0.00000555	0.00001652	0.00000734	0.00000633	0.00000818	0.00001538	0.00000946	0.00001187	0.00000952	0.00000996	0.00107738	0.00000435	0.00000386	0.00000510	0.00001017	0.00001332
543	NPL-SUB-066	Apiaceae	Anthriscus	sylvestris	Root	0.00000372	0.00000417	0.00000463	0.00000221	0.00000487	0.00000498	0.00000261	0.00000403	0.00000498	0.00000456	0.00000400	0.00000136	0.00000418	0.00000753	0.00000189	0.00000907	0.00002695	0.00001461	0.00000432	0.00000623	0.00000144	0.00000469	0.00000798	0.00000326	0.00001309	0.00000207	0.00000733	0.00000866	0.00000945	0.00000135	0.00000328	0.00000352	0.00000817	0.00000296	0.00000774	0.00000919	0.00000426	0.00000860	0.00050135	0.00000602	0.00001024	0.00020816	0.00002365	0.00002295
544	NPL-SUB-067	Asparagaceae	Anemarrhena	asphodeloides	Root	0.00000383	0.00000360	0.00000304	0.00000521	0.00000397	0.00000255	0.00000263	0.00000166	0.00000230	0.00000261	0.00000209	0.00000254	0.00000299	0.00000414	0.00000739	0.00000403	0.00000701	0.00001782	0.00000775	0.00000614	0.00000182	0.00000780	0.00000495	0.00000159	0.00000246	0.00000342	0.00000543	0.00001043	0.00001161	0.00001320	0.00001147	0.00001047	0.00000561	0.00000331	0.00001324	0.00003578	0.00005362	0.00009095	0.00036810	0.00000903	0.00000974	0.00001348	0.00000877	0.00000457
545	NPL-SUB-068	Asparagaceae	Anemarrhena	asphodeloides	Root	0.00000323	0.00000259	0.00000319	0.00000320	0.00000285	0.00000408	0.00000485	0.00000215	0.00000244	0.00000592	0.00000214	0.00000243	0.00000237	0.00000376	0.00000430	0.00000393	0.00000725	0.00000361	0.00000269	0.00000392	0.00000212	0.00000537	0.00000633	0.00000187	0.00000299	0.00000337	0.00000436	0.00000325	0.00000735	0.00000589	0.00000367	0.00000785	0.00000556	0.00000162	0.00000187	0.00001591	0.00002445	0.00003021	0.00022066	0.00000644	0.00000136	0.00000265	0.00000268	0.00000282
546	NPL-SUB-069	Asparagaceae	Anemarrhena	asphodeloides	Root	0.00000104	0.00000195	0.00000029	0.00000125	0.00000107	0.00000166	0.00000148	0.00000134	0.00000095	0.00000120	0.00000172	0.00000015	0.00000122	0.00000632	0.00000126	0.00000127	0.00000274	0.00000278	0.00000221	0.00000098	0.00000134	0.00000083	0.00000097	0.00000136	0.00000054	0.00000177	0.00000143	0.00000204	0.00000177	0.00000129	0.00000112	0.00000179	0.00000240	0.00000077	0.00000409	0.00004925	0.00000976	0.00005017	0.00003698	0.00016938	0.00000404	0.00002069	0.00000083	0.00000476
547	NPL-SUB-070	Asparagaceae	Anemarrhena	asphodeloides	Root	0.00001259	0.00001225	0.00001342	0.00000720	0.00000660	0.00000816	0.00001103	0.00001166	0.00001503	0.00000336	0.00000765	0.00000498	0.00000546	0.00000674	0.00000650	0.00000666	0.00001227	0.00000675	0.00001171	0.00000292	0.00000599	0.00000469	0.00000635	0.00000603	0.00000326	0.00000589	0.00000497	0.00000452	0.00000710	0.00000711	0.00000353	0.00000325	0.00000707	0.00000799	0.00001186	0.00001022	0.00001109	0.00001217	0.00001256	0.00054837	0.00000498	0.00001046	0.00001054	0.00000936
548	NPL-SUB-071	Rosaceae	Sanguisorba	officinalis	Root	0.00005519	0.00007135	0.00004442	0.00007392	0.00011162	0.00009793	0.00007333	0.00018282	0.00043321	0.00007112	0.00015528	0.00009470	0.00044314	0.00025434	0.00011007	0.00018291	0.00019329	0.00007335	0.00007712	0.00002642	0.00003706	0.00003814	0.00007120	0.00004311	0.00004878	0.00003515	0.00007536	0.00001670	0.00001937	0.00006333	0.00002441	0.00003413	0.00002467	0.00002842	0.00003154	0.00005881	0.00006440	0.00006888	0.00010779	0.00352776	0.00021676	0.00003059	0.00005738	0.00012372
549	NPL-SUB-072	Boraginaceae	Arnebia	euchroma	Root	0.00015418	0.00018498	0.00015750	0.00016706	0.00019971	0.00014397	0.00016392	0.00016340	0.00039245	0.00013906	0.00011965	0.00015037	0.00012899	0.00011200	0.00018838	0.00020230	0.00018307	0.00017324	0.00020008	0.00015857	0.00007523	0.00012784	0.00008288	0.00014784	0.00009430	0.00010047	0.00011157	0.00014387	0.00008222	0.00019591	0.00009049	0.00013244	0.00013223	0.00013256	0.00009729	0.00027473	0.00019377	0.00024037	0.00123608	0.01499989	0.00013751	0.00017807	0.00012527	0.00027213
550	NPL-SUB-073	Asteraceae	Atractylodes	macrocephala	Root	0.00000512	0.00000696	0.00000467	0.00000337	0.00000707	0.00000151	0.00000511	0.00001389	0.00000762	0.00000644	0.00000261	0.00000565	0.00000324	0.00000419	0.00000642	0.00000988	0.00001014	0.00002616	0.00000346	0.00000367	0.00000500	0.00000584	0.00000324	0.00000197	0.00000503	0.00000233	0.00000970	0.00000222	0.00000442	0.00000205	0.00000178	0.00000561	0.00000713	0.00000296	0.00000409	0.00000761	0.00000463	0.00000827	0.00033511	0.00000278	0.00000368	0.00000376	0.00000557	0.00000905
551	NPL-SUB-074	Apiaceae	Ligusticum	chuanxiong	Root	0.00001065	0.00001369	0.00001237	0.00000823	0.00000671	0.00001034	0.00001173	0.00003866	0.00001212	0.00001211	0.00000684	0.00000849	0.00001099	0.00001158	0.00001120	0.00001918	0.00007030	0.00002566	0.00000689	0.00001029	0.00000245	0.00000579	0.00003627	0.00000291	0.00003373	0.00000541	0.00001210	0.00000239	0.00000309	0.00000489	0.00000226	0.00000308	0.00000333	0.00000160	0.00000165	0.00000739	0.00000374	0.00000270	0.00043547	0.00000488	0.00000660	0.00017021	0.00001031	0.00001934
552	NPL-SUB-075	Apiaceae	Ligusticum	chuanxiong	Root	0.00001230	0.00000757	0.00001337	0.00001077	0.00000765	0.00001093	0.00001387	0.00005070	0.00001516	0.00000726	0.00000463	0.00000388	0.00000707	0.00000436	0.00000447	0.00000826	0.00005081	0.00000590	0.00001167	0.00000490	0.00000652	0.00000314	0.00003893	0.00000287	0.00003269	0.00000460	0.00002202	0.00000291	0.00000182	0.00000320	0.00000313	0.00000064	0.00000106	0.00000116	0.00000165	0.00001405	0.00000798	0.00000337	0.00066403	0.00000632	0.00000391	0.00011517	0.00000452	0.00002228
553	NPL-SUB-076	Apiaceae	Ligusticum	chuanxiong	Root	0.00000401	0.00000968	0.00000375	0.00000461	0.00000838	0.00000508	0.00000700	0.00002493	0.00001026	0.00000347	0.00000394	0.00000394	0.00000797	0.00000664	0.00000245	0.00000228	0.00004191	0.00000496	0.00000397	0.00000482	0.00000390	0.00000480	0.00003071	0.00000184	0.00002787	0.00000187	0.00000660	0.00000258	0.00000336	0.00000172	0.00000148	0.00000058	0.00000116	0.00000061	0.00000146	0.00000473	0.00000229	0.00000195	0.00036198	0.00000227	0.00000202	0.00002884	0.00000207	0.00000478
554	NPL-SUB-077	Ranunculaceae	Semiaquilegia	adoxoides	Root	0.00000218	0.00000183	0.00000233	0.00000173	0.00000214	0.00000190	0.00000248	0.00000297	0.00000358	0.00000257	0.00000533	0.00000343	0.00000644	0.00003589	0.00000444	0.00000711	0.00000954	0.00000799	0.00000443	0.00000293	0.00000179	0.00000081	0.00000024	0.00000055	0.00000030	0.00000176	0.00000125	0.00000009	0.00000065	0.00000060	0.00000078	0.00000094	0.00001043	0.00000136	0.00000662	0.00000392	0.00000430	0.00001082	0.00011797	0.00000700	0.00000878	0.00000365	0.00000111	0.00000111
555	NPL-SUB-078	Asparagaceae	Asparagus	cochinchinensis	Root	0.00000547	0.00000280	0.00000162	0.00000293	0.00000256	0.00000207	0.00000181	0.00000237	0.00000198	0.00000202	0.00000421	0.00000462	0.00000237	0.00000232	0.00000311	0.00000482	0.00000619	0.00000956	0.00001559	0.00000787	0.00000121	0.00000397	0.00000396	0.00000140	0.00000828	0.00001127	0.00001753	0.00002215	0.00000516	0.00000515	0.00000405	0.00000896	0.00000733	0.00000243	0.00000925	0.00000826	0.00001787	0.00000719	0.00018562	0.00000749	0.00000296	0.00000728	0.00000467	0.00000867
556	NPL-SUB-079	Orchidaceae	Gastrodia	elata	Root	0.00002561	0.00002940	0.00003168	0.00002493	0.00006966	0.00003821	0.00004572	0.00002953	0.00004063	0.00002877	0.00003068	0.00002837	0.00007720	0.00039873	0.00004194	0.00002881	0.00003395	0.00002701	0.00002113	0.00001895	0.00002770	0.00002961	0.00003341	0.00001942	0.00002081	0.00002937	0.00006825	0.00005081	0.00004098	0.00002662	0.00002081	0.00003869	0.00005293	0.00004711	0.00002112	0.00004918	0.00005588	0.00011115	0.00010701	0.00140485	0.00003549	0.00012328	0.00007152	0.00015778
557	NPL-SUB-080	Orchidaceae	Gastrodia	elata	Root	0.00002432	0.00002025	0.00002749	0.00003224	0.00004027	0.00003089	0.00007779	0.00003398	0.00002333	0.00002723	0.00003048	0.00002842	0.00002131	0.00002612	0.00003622	0.00002504	0.00003982	0.00003248	0.00003422	0.00002928	0.00003426	0.00003484	0.00002382	0.00002270	0.00004209	0.00002395	0.00009206	0.00004043	0.00002330	0.00003167	0.00002095	0.00003948	0.00006585	0.00005170	0.00003140	0.00004214	0.00010304	0.00004009	0.00147079	0.00001856	0.00002760	0.00017975	0.00004176	0.00011704
558	NPL-SUB-081	Smilacaceae	Smilax	china	Root	0.00001756	0.00001924	0.00001634	0.00001668	0.00001704	0.00003572	0.00001608	0.00002765	0.00005396	0.00001516	0.00001170	0.00001794	0.00002209	0.00002127	0.00001168	0.00001907	0.00001886	0.00001918	0.00001322	0.00000981	0.00001388	0.00002114	0.00000450	0.00000939	0.00001260	0.00001007	0.00001139	0.00001170	0.00001657	0.00001583	0.00001692	0.00001414	0.00000722	0.00000776	0.00001204	0.00000971	0.00001662	0.00000511	0.00131873	0.00001511	0.00001082	0.00001092	0.00000709	0.00000475
559	NPL-SUB-082	Smilacaceae	Smilax	china	Root	0.00001771	0.00002815	0.00001468	0.00003836	0.00003081	0.00002736	0.00003123	0.00003051	0.00003749	0.00001786	0.00002862	0.00002385	0.00002058	0.00002340	0.00001739	0.00001749	0.00002825	0.00004519	0.00001224	0.00001045	0.00001742	0.00008897	0.00002033	0.00001057	0.00001147	0.00001173	0.00001599	0.00001055	0.00006777	0.00006640	0.00000460	0.00000668	0.00000504	0.00000649	0.00001327	0.00001348	0.00001718	0.00001058	0.00136857	0.00002911	0.00000793	0.00003616	0.00001165	0.00000464
560	NPL-SUB-083	Caryophyllaceae	Pseudostellaria	heterophylla	Root	0.00001654	0.00001568	0.00001559	0.00002291	0.00001465	0.00001606	0.00002166	0.00001763	0.00001769	0.00001606	0.00001843	0.00004734	0.00001712	0.00001533	0.00005757	0.00001917	0.00002208	0.00002180	0.00001426	0.00001971	0.00002120	0.00001234	0.00001747	0.00000774	0.00000962	0.00000718	0.00001471	0.00000639	0.00000648	0.00000428	0.00001104	0.00000604	0.00000551	0.00000180	0.00000531	0.00000801	0.00000223	0.00000229	0.00049666	0.00000976	0.00000132	0.00001676	0.00000049	0.00000871
561	NPL-SUB-084	Caryophyllaceae	Pseudostellaria	heterophylla	Root	0.00000232	0.00000386	0.00000176	0.00000545	0.00000473	0.00000180	0.00000220	0.00000109	0.00000419	0.00000129	0.00000354	0.00001793	0.00000276	0.00000211	0.00001288	0.00000528	0.00001584	0.00001346	0.00000441	0.00000438	0.00000424	0.00000182	0.00000704	0.00000170	0.00000453	0.00000444	0.00001107	0.00000226	0.00000177	0.00000374	0.00000846	0.00000648	0.00000417	0.00000397	0.00000839	0.00001390	0.00000264	0.00000453	0.00055018	0.00000687	0.00000315	0.00002991	0.00000321	0.00001404
562	NPL-SUB-085	Smilacaceae	Smilax	china	Root	0.00001363	0.00000810	0.00001290	0.00001030	0.00000993	0.00000980	0.00002284	0.00001541	0.00000928	0.00001066	0.00001089	0.00000621	0.00001517	0.00000880	0.00001200	0.00000903	0.00001110	0.00001057	0.00000527	0.00000570	0.00000825	0.00001093	0.00000522	0.00000721	0.00000401	0.00000393	0.00000994	0.00000662	0.00001281	0.00001070	0.00002093	0.00002092	0.00000599	0.00000583	0.00001209	0.00000690	0.00001140	0.00000868	0.00069615	0.00003341	0.00001695	0.00001721	0.00001177	0.00000836
563	NPL-SUB-086	Cruciferae	Isatis	tinctoria	Root	0.00000402	0.00000735	0.00000403	0.00000396	0.00000947	0.00000546	0.00000559	0.00000195	0.00000250	0.00000237	0.00000520	0.00000111	0.00000159	0.00000482	0.00000320	0.00000479	0.00000682	0.00001577	0.00000481	0.00000506	0.00000431	0.00001502	0.00000382	0.00000322	0.00000246	0.00000253	0.00000971	0.00000310	0.00001601	0.00001542	0.00000273	0.00000212	0.00000366	0.00000505	0.00000712	0.00000986	0.00001267	0.00001866	0.00060503	0.00001072	0.00001228	0.00008305	0.00001533	0.00002608
564	NPL-SUB-087	Zingiberaceae	Zingiber	Rhizoma	Root	0.00001053	0.00000284	0.00001335	0.00001026	0.00001257	0.00000974	0.00001341	0.00005026	0.00001175	0.00001111	0.00001903	0.00001073	0.00001035	0.00004151	0.00001904	0.00006329	0.00017936	0.00012215	0.00002371	0.00001727	0.00001428	0.00000414	0.00001765	0.00000646	0.00001464	0.00001119	0.00001676	0.00000898	0.00000295	0.00000477	0.00000778	0.00001418	0.00006433	0.00000560	0.00005834	0.00011886	0.00015778	0.00021480	0.00034892	0.00075340	0.00035466	0.00013207	0.00023883	0.00007592
565	NPL-SUB-088	Cyperaceae	Cyperus	rotundus	Root	0.00000537	0.00000614	0.00000920	0.00000626	0.00000985	0.00000738	0.00001723	0.00003549	0.00001371	0.00000506	0.00000299	0.00000686	0.00001004	0.00009175	0.00000741	0.00001126	0.00003851	0.00003577	0.00000515	0.00000340	0.00000266	0.00000558	0.00000407	0.00000139	0.00000166	0.00000108	0.00000678	0.00000176	0.00000540	0.00000054	0.00000076	0.00001417	0.00000540	0.00000205	0.00002011	0.00001655	0.00004135	0.00001215	0.00106904	0.00004414	0.00000800	0.00001904	0.00000386	0.00000737
566	NPL-SUB-089	Scrophulariaceae	Scrophularia	ningpoensis	Root	0.00000090	0.00000104	0.00000150	0.00000072	0.00000338	0.00000283	0.00000372	0.00000288	0.00000258	0.00000144	0.00000246	0.00000178	0.00000255	0.00000389	0.00000235	0.00000744	0.00001501	0.00000346	0.00000614	0.00000529	0.00000553	0.00000784	0.00001173	0.00001568	0.00002555	0.00004462	0.00006782	0.00011017	0.00011997	0.00010444	0.00005602	0.00004442	0.00003698	0.00003090	0.00002909	0.00002293	0.00002237	0.00002153	0.00045584	0.00000898	0.00000328	0.00001703	0.00000595	0.00001342
567	NPL-SUB-090	Poaceae	Phragmites	communis	Root	0.00000754	0.00001315	0.00001600	0.00001476	0.00001175	0.00001380	0.00003120	0.00004738	0.00000995	0.00001045	0.00002128	0.00002415	0.00001322	0.00002919	0.00001758	0.00001009	0.00002316	0.00002714	0.00001613	0.00000553	0.00001115	0.00000903	0.00000579	0.00001004	0.00001405	0.00000961	0.00002098	0.00001032	0.00000617	0.00001380	0.00001971	0.00002943	0.00001578	0.00001392	0.00001915	0.00001573	0.00002432	0.00001890	0.00092150	0.00002051	0.00001156	0.00002464	0.00001689	0.00001021
568	NPL-SUB-091	Polygonaceae	Polygonum	cuspidatum	Root	0.00002092	0.00001432	0.00001492	0.00002258	0.00002508	0.00002234	0.00003509	0.00001797	0.00001694	0.00001615	0.00001445	0.00001464	0.00001626	0.00002986	0.00002194	0.00002117	0.00001411	0.00001926	0.00002192	0.00000948	0.00001750	0.00000731	0.00000840	0.00000758	0.00001312	0.00000981	0.00000718	0.00001568	0.00000846	0.00001793	0.00000570	0.00000899	0.00000681	0.00000945	0.00001108	0.00001157	0.00001229	0.00001068	0.00103839	0.00001048	0.00000504	0.00001846	0.00001681	0.00002089
569	NPL-SUB-092	Scrophulariaceae	Picrorhiza	kurroa	Root	0.00000003	0.00000002	0.00000028	0.00000016	0.00000031	0.00000145	0.00001076	0.00002731	0.00001355	0.00000168	0.00001390	0.00001162	0.00000957	0.00000172	0.00000268	0.00002666	0.00001253	0.00001065	0.00001539	0.00000487	0.00000152	0.00001353	0.00001644	0.00003108	0.00004165	0.00004226	0.00002856	0.00003042	0.00002937	0.00002515	0.00003194	0.00003567	0.00002343	0.00002937	0.00003380	0.00004041	0.00002371	0.00003505	0.00033391	0.00003024	0.00000803	0.00000580	0.00000416	0.00000362
570	NPL-SUB-093	Fabaceae	Hedysarum	polybotrys	Root	0.00000683	0.00000210	0.00000489	0.00000542	0.00000496	0.00000302	0.00000258	0.00000466	0.00000419	0.00000146	0.00000348	0.00000441	0.00000272	0.00000321	0.00000253	0.00000407	0.00000737	0.00000930	0.00000348	0.00000600	0.00000211	0.00001796	0.00000170	0.00000371	0.00000137	0.00000460	0.00001283	0.00000731	0.00002188	0.00001104	0.00000224	0.00002295	0.00002359	0.00000217	0.00004149	0.00001158	0.00004435	0.00000922	0.00048490	0.00001485	0.00000923	0.00001806	0.00001529	0.00001882
571	NPL-SUB-094	Araliaceae (적색)	Panax	ginseng	Root	0.00002040	0.00001613	0.00001868	0.00001748	0.00002653	0.00002275	0.00001871	0.00002572	0.00002113	0.00001693	0.00001694	0.00002442	0.00002424	0.00003349	0.00002207	0.00003000	0.00003081	0.00002560	0.00001668	0.00001551	0.00002381	0.00002379	0.00001281	0.00001572	0.00001278	0.00001022	0.00002179	0.00001943	0.00001468	0.00001601	0.00001205	0.00001069	0.00001581	0.00000573	0.00001878	0.00001021	0.00001661	0.00000679	0.00062417	0.00002515	0.00001320	0.00004421	0.00000777	0.00000935
572	NPL-SUB-095	Araliaceae (적색)	Panax	ginseng	Root	0.00000540	0.00000512	0.00000523	0.00000426	0.00000446	0.00000426	0.00000291	0.00000467	0.00000592	0.00000572	0.00000382	0.00000242	0.00000261	0.00000542	0.00000233	0.00000743	0.00001730	0.00001213	0.00000575	0.00000365	0.00000253	0.00000184	0.00000483	0.00000250	0.00000664	0.00000384	0.00000481	0.00000266	0.00000373	0.00000162	0.00000338	0.00000329	0.00000560	0.00000135	0.00000457	0.00000320	0.00000321	0.00000522	0.00049072	0.00000186	0.00000185	0.00003658	0.00000455	0.00000594
573	NPL-SUB-096	Lamiaceae	Scutellaria	baicalensis	Root	0.00000757	0.00000845	0.00000698	0.00000710	0.00000970	0.00000562	0.00000712	0.00000505	0.00000955	0.00000802	0.00000724	0.00000261	0.00000718	0.00002150	0.00000612	0.00002633	0.00001415	0.00001369	0.00000772	0.00000605	0.00000720	0.00001591	0.00000242	0.00000187	0.00000410	0.00000583	0.00000236	0.00000200	0.00001612	0.00001054	0.00000128	0.00000350	0.00000255	0.00000136	0.00000667	0.00000361	0.00000464	0.00000991	0.00070626	0.00001886	0.00000279	0.00000491	0.00008598	0.00003006
574	NPL-SUB-097	Fabaceae	Astragalus	membranaceus	Root	0.00000724	0.00000422	0.00000531	0.00000437	0.00000499	0.00000450	0.00000742	0.00000473	0.00000401	0.00000339	0.00000431	0.00000200	0.00000120	0.00000430	0.00000455	0.00000576	0.00000635	0.00001226	0.00000398	0.00000304	0.00000800	0.00004624	0.00000372	0.00000205	0.00000203	0.00000111	0.00000462	0.00000221	0.00006109	0.00002747	0.00000290	0.00000159	0.00000222	0.00000165	0.00000717	0.00000474	0.00000239	0.00000195	0.00030999	0.00000232	0.00000318	0.00001801	0.00004849	0.00006401
575	NPL-SUB-098	Fabaceae	Astragalus	membranaceus	Root	0.00000721	0.00000700	0.00000329	0.00000501	0.00000474	0.00000378	0.00000628	0.00000447	0.00000390	0.00000453	0.00000264	0.00000514	0.00000313	0.00000282	0.00000444	0.00000783	0.00000685	0.00000743	0.00000346	0.00000601	0.00000431	0.00013766	0.00000558	0.00000374	0.00000344	0.00000599	0.00000811	0.00000536	0.00019096	0.00008442	0.00000688	0.00001462	0.00001536	0.00000470	0.00007027	0.00000568	0.00002070	0.00001004	0.00036754	0.00001509	0.00000960	0.00001508	0.00011561	0.00013043
576	NPL-SUB-099	Fabaceae	Glycyrrhiza	uralensis	Root	0.00000378	0.00000090	0.00000058	0.00000135	0.00000143	0.00000179	0.00000292	0.00000056	0.00000135	0.00000064	0.00000039	0.00000084	0.00000031	0.00000092	0.00000092	0.00000885	0.00000484	0.00000746	0.00000000	0.00000000	0.00000017	0.00018040	0.00000000	0.00000009	0.00000000	0.00000000	0.00000005	0.00000018	0.00021845	0.00011764	0.00000000	0.00000000	0.00000000	0.00000000	0.00000016	0.00000000	0.00000010	0.00000000	0.00054556	0.00000000	0.00000000	0.00000000	0.00005521	0.00005531
577	NPL-SUB-100	Fabaceae	Glycyrrhiza	uralensis	Root	0.00000476	0.00000399	0.00000260	0.00000169	0.00000112	0.00000191	0.00000255	0.00000116	0.00000047	0.00000082	0.00000151	0.00000130	0.00000063	0.00000166	0.00000185	0.00001359	0.00000593	0.00000652	0.00000018	0.00000001	0.00000003	0.00018405	0.00000000	0.00000000	0.00000007	0.00000000	0.00000000	0.00000006	0.00021890	0.00013312	0.00000000	0.00000000	0.00000000	0.00000000	0.00000038	0.00000000	0.00000024	0.00000000	0.00052064	0.00000003	0.00000000	0.00000000	0.00003069	0.00004343
578	NPL-SUB-101	Fabaceae	Glycyrrhiza	uralensis	Root	0.00000425	0.00000162	0.00000286	0.00000207	0.00000320	0.00000161	0.00000247	0.00000082	0.00000027	0.00000024	0.00000035	0.00000050	0.00000014	0.00000018	0.00000084	0.00000623	0.00000527	0.00000507	0.00000000	0.00000001	0.00000000	0.00017727	0.00000000	0.00000000	0.00000000	0.00000003	0.00000007	0.00000000	0.00020689	0.00012333	0.00000000	0.00000000	0.00000000	0.00000000	0.00000002	0.00000000	0.00000001	0.00000000	0.00059432	0.00000000	0.00000000	0.00000000	0.00002857	0.00004516
579	NPL-SUB-102	Fabaceae	Glycyrrhiza	uralensis	Root	0.00000189	0.00000254	0.00000035	0.00000057	0.00000128	0.00000187	0.00000151	0.00000008	0.00000074	0.00000006	0.00000053	0.00000038	0.00000053	0.00000016	0.00000088	0.00000615	0.00000921	0.00000421	0.00000023	0.00000008	0.00000000	0.00017770	0.00000000	0.00000000	0.00000000	0.00000000	0.00000000	0.00000000	0.00019934	0.00012601	0.00000000	0.00000000	0.00000000	0.00000000	0.00000013	0.00000000	0.00000000	0.00000000	0.00052710	0.00000000	0.00000000	0.00000000	0.00002616	0.00004707
580	NPL-SUB-103	Fabaceae	Glycyrrhiza	uralensis	Root	0.00000051	0.00000013	0.00000070	0.00000123	0.00000146	0.00000183	0.00000196	0.00000067	0.00000011	0.00000014	0.00000017	0.00000049	0.00000040	0.00000075	0.00000107	0.00000782	0.00000833	0.00000753	0.00000000	0.00000000	0.00000003	0.00016702	0.00000000	0.00000000	0.00000000	0.00000000	0.00000000	0.00000000	0.00018228	0.00012568	0.00000000	0.00000000	0.00000000	0.00000000	0.00000037	0.00000000	0.00000000	0.00000000	0.00052133	0.00000005	0.00000000	0.00000000	0.00001706	0.00005101
581	NPL-SUB-104	Fabaceae	Glycyrrhiza	uralensis	Root	0.00000796	0.00000784	0.00000952	0.00000536	0.00000359	0.00000585	0.00001086	0.00000807	0.00000516	0.00000549	0.00000552	0.00000499	0.00000450	0.00000337	0.00000235	0.00001093	0.00002154	0.00001145	0.00000162	0.00000131	0.00000013	0.00018854	0.00000212	0.00000032	0.00000006	0.00000015	0.00000102	0.00000007	0.00021509	0.00013944	0.00000043	0.00000000	0.00000076	0.00000000	0.00000090	0.00000000	0.00000016	0.00000000	0.00055258	0.00000551	0.00000000	0.00000004	0.00003105	0.00004395
582	NPL-SUB-105	Fabaceae	Glycyrrhiza	uralensis	Root	0.00000056	0.00000277	0.00000219	0.00000071	0.00000156	0.00000259	0.00000136	0.00000061	0.00000075	0.00000102	0.00000065	0.00000016	0.00000018	0.00000031	0.00000031	0.00000724	0.00000615	0.00000329	0.00000000	0.00000000	0.00000022	0.00018141	0.00000000	0.00000000	0.00000015	0.00000000	0.00000005	0.00000000	0.00021513	0.00012174	0.00000000	0.00000000	0.00000002	0.00000000	0.00000023	0.00000000	0.00000000	0.00000000	0.00050474	0.00000000	0.00000000	0.00000012	0.00004136	0.00004941
583	NPL-SUB-106	Fabaceae	Glycyrrhiza	uralensis	Root	0.00000925	0.00000388	0.00000502	0.00000514	0.00000461	0.00000046	0.00000280	0.00000399	0.00000086	0.00000257	0.00000083	0.00000117	0.00000072	0.00000101	0.00000140	0.00000822	0.00000972	0.00000639	0.00000072	0.00000003	0.00000004	0.00016452	0.00000071	0.00000002	0.00000002	0.00000000	0.00000083	0.00000000	0.00018840	0.00011112	0.00000000	0.00000000	0.00000000	0.00000000	0.00000000	0.00000000	0.00000000	0.00000000	0.00044027	0.00000003	0.00000000	0.00000000	0.00002124	0.00003847
584	NPL-SUB-107	Fabaceae	Glycyrrhiza	uralensis	Root	0.00000598	0.00000871	0.00000466	0.00000582	0.00000453	0.00000550	0.00000818	0.00000254	0.00000271	0.00000219	0.00000071	0.00000127	0.00000062	0.00000031	0.00000077	0.00000700	0.00001073	0.00000529	0.00000016	0.00000041	0.00000008	0.00018114	0.00000000	0.00000000	0.00000000	0.00000002	0.00000000	0.00000000	0.00020987	0.00012541	0.00000000	0.00000000	0.00000000	0.00000000	0.00000052	0.00000000	0.00000000	0.00000000	0.00054347	0.00000007	0.00000000	0.00000000	0.00002260	0.00004525
585	NPL-SUB-108	Fabaceae	Glycyrrhiza	uralensis	Root	0.00000510	0.00000589	0.00000544	0.00000234	0.00000319	0.00000162	0.00000145	0.00000149	0.00000120	0.00000062	0.00000089	0.00000062	0.00000015	0.00000060	0.00000159	0.00000414	0.00000780	0.00000562	0.00000000	0.00000000	0.00000009	0.00016710	0.00000000	0.00000000	0.00000000	0.00000000	0.00000004	0.00000000	0.00017732	0.00012103	0.00000000	0.00000000	0.00000000	0.00000000	0.00000000	0.00000000	0.00000000	0.00000000	0.00040805	0.00000000	0.00000000	0.00000000	0.00001441	0.00004673
586	NPL-SUB-109	Fabaceae	Glycyrrhiza	uralensis	Root	0.00000778	0.00001038	0.00000622	0.00000944	0.00000742	0.00000477	0.00000756	0.00000669	0.00000266	0.00000301	0.00000599	0.00000106	0.00000298	0.00000183	0.00000415	0.00000829	0.00000862	0.00001117	0.00000117	0.00000058	0.00000002	0.00017781	0.00000092	0.00000040	0.00000000	0.00000029	0.00000064	0.00000000	0.00020903	0.00012469	0.00000004	0.00000000	0.00000000	0.00000000	0.00000039	0.00000000	0.00000000	0.00000000	0.00049883	0.00000007	0.00000000	0.00000000	0.00001484	0.00003660
587	NPL-SUB-110	Fabaceae	Glycyrrhiza	uralensis	Root	0.00000699	0.00001305	0.00001227	0.00000872	0.00000787	0.00000739	0.00001047	0.00000355	0.00000795	0.00000458	0.00000667	0.00000270	0.00000336	0.00000402	0.00000490	0.00001216	0.00000808	0.00000995	0.00000217	0.00000034	0.00000020	0.00019468	0.00000016	0.00000005	0.00000000	0.00000000	0.00000003	0.00000000	0.00022335	0.00013935	0.00000000	0.00000000	0.00000000	0.00000000	0.00000108	0.00000000	0.00000000	0.00000000	0.00054047	0.00000001	0.00000000	0.00000000	0.00001996	0.00003918
588	NPL-SUB-111	Fabaceae	Glycyrrhiza	uralensis	Root	0.00000429	0.00000194	0.00000229	0.00000170	0.00000191	0.00000034	0.00000536	0.00000478	0.00000095	0.00000176	0.00000055	0.00000045	0.00000094	0.00000117	0.00000038	0.00001028	0.00000001	0.00000000	0.00000000	0.00000000	0.00000001	0.00022384	0.00000005	0.00000000	0.00000000	0.00000000	0.00000000	0.00000000	0.00025678	0.00017418	0.00000000	0.00000000	0.00000000	0.00000000	0.00000015	0.00000000	0.00000000	0.00000000	0.00056043	0.00000000	0.00000000	0.00000000	0.00005614	0.00007244
589	NPL-SUB-112	Fabaceae	Glycyrrhiza	uralensis	Root	0.00000470	0.00000314	0.00000574	0.00000260	0.00000327	0.00000114	0.00000425	0.00000122	0.00000108	0.00000075	0.00000207	0.00000044	0.00000041	0.00000025	0.00000093	0.00000706	0.00000011	0.00000017	0.00000005	0.00000000	0.00000020	0.00023377	0.00000000	0.00000000	0.00000000	0.00000000	0.00000015	0.00000000	0.00025513	0.00017829	0.00000000	0.00000000	0.00000000	0.00000000	0.00000003	0.00000000	0.00000000	0.00000000	0.00058692	0.00000000	0.00000000	0.00000000	0.00005074	0.00007459
590	NPL-SUB-113	Fabaceae	Glycyrrhiza	uralensis	Root	0.00000157	0.00000107	0.00000151	0.00000084	0.00000022	0.00000079	0.00000165	0.00000075	0.00000062	0.00000000	0.00000062	0.00000010	0.00000045	0.00000004	0.00000028	0.00000815	0.00000032	0.00000000	0.00000008	0.00000000	0.00000000	0.00022974	0.00000000	0.00000000	0.00000000	0.00000002	0.00000000	0.00000000	0.00024526	0.00017351	0.00000000	0.00000000	0.00000000	0.00000000	0.00000029	0.00000000	0.00000000	0.00000000	0.00057040	0.00000000	0.00000000	0.00000000	0.00005579	0.00007330
591	NPL-SUB-114	Fabaceae	Glycyrrhiza	uralensis	Root	0.00000319	0.00000197	0.00000253	0.00000222	0.00000177	0.00000204	0.00000396	0.00000315	0.00000042	0.00000076	0.00000011	0.00000056	0.00000028	0.00000241	0.00000048	0.00000512	0.00000082	0.00000060	0.00000000	0.00000009	0.00000000	0.00023245	0.00000000	0.00000009	0.00000003	0.00000006	0.00000006	0.00000000	0.00026847	0.00016238	0.00000000	0.00000000	0.00000000	0.00000000	0.00000000	0.00000000	0.00000000	0.00000000	0.00061202	0.00000028	0.00000000	0.00000000	0.00003657	0.00007990
592	NPL-SUB-115	Fabaceae	Glycyrrhiza	uralensis	Root	0.00000565	0.00000654	0.00000563	0.00000824	0.00000514	0.00000214	0.00000318	0.00000460	0.00000070	0.00000232	0.00000139	0.00000162	0.00000047	0.00000108	0.00000023	0.00000601	0.00000169	0.00000031	0.00000000	0.00000000	0.00000003	0.00022923	0.00000000	0.00000000	0.00000000	0.00000000	0.00000033	0.00000000	0.00025024	0.00016840	0.00000000	0.00000000	0.00000000	0.00000000	0.00000006	0.00000000	0.00000000	0.00000000	0.00057656	0.00000005	0.00000000	0.00000000	0.00003267	0.00007351
593	NPL-SUB-116	Fabaceae	Glycyrrhiza	uralensis	Root	0.00000725	0.00000406	0.00000277	0.00000273	0.00000377	0.00000323	0.00000451	0.00000299	0.00000016	0.00000114	0.00000064	0.00000025	0.00000046	0.00000049	0.00000093	0.00000440	0.00000045	0.00000017	0.00000000	0.00000000	0.00000044	0.00021792	0.00000015	0.00000000	0.00000000	0.00000000	0.00000000	0.00000000	0.00022948	0.00017821	0.00000000	0.00000000	0.00000000	0.00000000	0.00000000	0.00000000	0.00000000	0.00000000	0.00059258	0.00000023	0.00000000	0.00000000	0.00003136	0.00007765
594	NPL-SUB-117	Fabaceae	Glycyrrhiza	uralensis	Root	0.00000089	0.00000244	0.00000128	0.00000052	0.00000026	0.00000027	0.00000280	0.00000009	0.00000063	0.00000009	0.00000011	0.00000018	0.00000000	0.00000015	0.00000009	0.00000853	0.00000179	0.00000002	0.00000007	0.00000000	0.00000000	0.00022494	0.00000000	0.00000000	0.00000000	0.00000000	0.00000035	0.00000000	0.00026436	0.00016481	0.00000000	0.00000000	0.00000000	0.00000000	0.00000036	0.00000064	0.00000000	0.00000000	0.00060717	0.00000003	0.00000000	0.00000000	0.00003866	0.00010361
595	NPL-SUB-118	Fabaceae	Glycyrrhiza	uralensis	Root	0.00000465	0.00000536	0.00000610	0.00000178	0.00000427	0.00000092	0.00000577	0.00000047	0.00000099	0.00000011	0.00000043	0.00000002	0.00000037	0.00000043	0.00000145	0.00000550	0.00000049	0.00000091	0.00000016	0.00000000	0.00000000	0.00022607	0.00000000	0.00000000	0.00000000	0.00000000	0.00000029	0.00000000	0.00022773	0.00018802	0.00000000	0.00000000	0.00000026	0.00000000	0.00000000	0.00000000	0.00000000	0.00000000	0.00050313	0.00000004	0.00000000	0.00000000	0.00002721	0.00009345
596	NPL-SUB-119	Fabaceae	Glycyrrhiza	uralensis	Root	0.00000797	0.00000369	0.00000269	0.00000132	0.00000402	0.00000078	0.00000333	0.00000102	0.00000151	0.00000044	0.00000105	0.00000053	0.00000031	0.00000115	0.00000054	0.00000803	0.00000315	0.00000004	0.00000000	0.00000000	0.00000000	0.00023535	0.00000000	0.00000000	0.00000000	0.00000000	0.00000012	0.00000000	0.00026572	0.00017510	0.00000000	0.00000000	0.00000000	0.00000000	0.00000011	0.00000021	0.00000000	0.00000000	0.00075256	0.00000016	0.00000000	0.00000000	0.00003684	0.00009530
597	NPL-SUB-120	Fabaceae	Astragalus	membranaceus	Root	0.00000158	0.00000478	0.00000096	0.00000160	0.00000147	0.00000104	0.00000141	0.00000214	0.00000170	0.00000076	0.00000098	0.00000025	0.00000057	0.00000093	0.00000269	0.00000403	0.00000373	0.00001072	0.00000300	0.00000150	0.00000298	0.00005093	0.00000041	0.00000053	0.00000003	0.00000084	0.00000264	0.00000096	0.00007371	0.00002858	0.00000234	0.00000164	0.00000352	0.00000093	0.00000590	0.00000237	0.00000689	0.00000365	0.00059298	0.00000110	0.00000115	0.00001062	0.00006236	0.00007888
598	NPL-SUB-121	Fabaceae	Astragalus	membranaceus	Root	0.00000206	0.00000154	0.00000498	0.00000157	0.00000265	0.00000276	0.00000122	0.00000195	0.00000321	0.00000256	0.00000210	0.00000099	0.00000338	0.00000148	0.00000225	0.00000262	0.00000730	0.00001279	0.00000221	0.00000074	0.00000419	0.00005266	0.00000103	0.00000169	0.00000171	0.00000091	0.00000526	0.00000062	0.00007270	0.00003553	0.00000146	0.00000167	0.00000154	0.00000172	0.00000658	0.00000434	0.00001105	0.00000590	0.00055574	0.00000771	0.00000572	0.00001344	0.00006496	0.00009245
599	NPL-SUB-122	Fabaceae	Astragalus	membranaceus	Root	0.00000070	0.00000251	0.00000194	0.00000340	0.00000103	0.00000052	0.00000182	0.00000187	0.00000134	0.00000144	0.00000098	0.00000229	0.00000081	0.00000117	0.00000163	0.00000102	0.00000427	0.00001212	0.00000144	0.00000073	0.00000297	0.00005155	0.00000048	0.00000068	0.00000043	0.00000108	0.00000291	0.00000133	0.00007528	0.00003042	0.00000124	0.00000103	0.00000456	0.00000130	0.00000650	0.00000158	0.00000850	0.00000278	0.00058472	0.00000108	0.00000172	0.00001099	0.00005232	0.00007885
600	NPL-SUB-123	Fabaceae	Astragalus	membranaceus	Root	0.00000217	0.00000328	0.00000124	0.00000231	0.00000172	0.00000226	0.00000155	0.00000123	0.00000264	0.00000145	0.00000103	0.00000367	0.00000155	0.00000127	0.00000213	0.00000109	0.00000395	0.00001473	0.00000145	0.00000201	0.00000429	0.00005225	0.00000065	0.00000035	0.00000097	0.00000070	0.00000387	0.00000313	0.00007664	0.00002701	0.00000126	0.00000214	0.00000348	0.00000041	0.00000522	0.00000253	0.00000590	0.00000227	0.00051108	0.00000195	0.00000153	0.00000917	0.00006028	0.00007937
601	NPL-SUB-124	Fabaceae	Astragalus	membranaceus	Root	0.00000416	0.00000123	0.00000220	0.00000157	0.00000222	0.00000185	0.00000122	0.00000479	0.00000178	0.00000185	0.00000441	0.00000135	0.00000235	0.00000211	0.00000104	0.00000250	0.00000380	0.00001358	0.00000122	0.00000131	0.00000243	0.00005472	0.00000228	0.00000020	0.00000171	0.00000109	0.00000708	0.00000222	0.00007115	0.00003130	0.00000170	0.00000110	0.00000105	0.00000041	0.00000825	0.00000228	0.00000642	0.00000207	0.00055221	0.00000183	0.00000285	0.00000291	0.00005832	0.00008016
602	NPL-SUB-125	Fabaceae	Astragalus	membranaceus	Root	0.00000349	0.00000213	0.00000251	0.00000056	0.00000321	0.00000294	0.00000216	0.00000209	0.00000170	0.00000244	0.00000261	0.00000184	0.00000228	0.00000186	0.00000282	0.00000285	0.00000921	0.00001861	0.00000323	0.00000126	0.00000480	0.00005556	0.00000209	0.00000189	0.00000174	0.00000125	0.00000306	0.00000297	0.00007011	0.00003076	0.00000137	0.00000115	0.00000453	0.00000065	0.00001193	0.00000376	0.00000948	0.00000300	0.00050340	0.00000691	0.00000507	0.00000553	0.00005295	0.00008082
603	NPL-SUB-126	Fabaceae	Astragalus	membranaceus	Root	0.00000191	0.00000092	0.00000154	0.00000615	0.00000086	0.00000147	0.00000220	0.00000109	0.00000208	0.00000116	0.00000209	0.00000287	0.00000085	0.00000099	0.00000093	0.00000134	0.00000294	0.00000834	0.00000177	0.00000111	0.00000266	0.00006022	0.00000033	0.00000027	0.00000011	0.00000023	0.00000289	0.00000074	0.00007441	0.00003277	0.00000065	0.00000172	0.00000259	0.00000103	0.00000427	0.00000187	0.00000529	0.00000147	0.00046567	0.00000138	0.00000421	0.00000773	0.00005893	0.00008992
604	NPL-SUB-127	Fabaceae	Astragalus	membranaceus	Root	0.00000289	0.00000151	0.00000161	0.00000192	0.00000073	0.00000287	0.00000353	0.00000208	0.00000297	0.00000152	0.00000137	0.00000174	0.00000260	0.00000143	0.00000137	0.00000243	0.00000619	0.00001294	0.00000349	0.00000094	0.00000310	0.00005384	0.00000040	0.00000165	0.00000058	0.00000058	0.00000297	0.00000174	0.00007959	0.00003200	0.00000047	0.00000144	0.00000360	0.00000031	0.00000699	0.00000338	0.00000623	0.00000338	0.00058680	0.00000135	0.00000135	0.00000681	0.00006331	0.00008927
605	NPL-SUB-128	Fabaceae	Astragalus	membranaceus	Root	0.00000183	0.00000116	0.00000091	0.00000203	0.00000114	0.00000130	0.00000223	0.00000208	0.00000226	0.00000230	0.00000164	0.00000175	0.00000157	0.00000221	0.00000114	0.00000170	0.00000443	0.00001843	0.00000309	0.00000073	0.00000286	0.00005414	0.00000095	0.00000093	0.00000037	0.00000135	0.00000330	0.00000092	0.00006853	0.00003074	0.00000098	0.00000207	0.00000469	0.00000032	0.00001013	0.00000381	0.00000673	0.00000226	0.00056596	0.00000117	0.00000403	0.00001375	0.00005603	0.00008112
606	NPL-SUB-129	Fabaceae	Astragalus	membranaceus	Root	0.00000250	0.00000122	0.00000160	0.00000190	0.00000169	0.00000168	0.00000367	0.00000140	0.00000471	0.00000115	0.00000213	0.00000307	0.00000111	0.00000191	0.00000252	0.00000182	0.00000279	0.00001677	0.00000121	0.00000093	0.00000347	0.00005542	0.00000039	0.00000015	0.00000048	0.00000152	0.00000453	0.00000155	0.00006978	0.00002917	0.00000060	0.00000133	0.00000273	0.00000092	0.00000583	0.00000118	0.00000594	0.00000282	0.00049082	0.00000375	0.00000452	0.00000859	0.00005567	0.00008141
607	NPL-SUB-130	Fabaceae	Astragalus	membranaceus	Root	0.00000149	0.00000145	0.00000360	0.00000096	0.00000157	0.00000234	0.00000197	0.00000161	0.00000123	0.00000133	0.00000071	0.00000072	0.00000210	0.00000067	0.00000081	0.00000157	0.00000292	0.00001960	0.00000281	0.00000212	0.00000243	0.00004922	0.00000066	0.00000020	0.00000067	0.00000158	0.00000340	0.00000197	0.00006495	0.00003122	0.00000151	0.00000142	0.00000111	0.00000011	0.00000461	0.00000164	0.00000709	0.00000232	0.00049472	0.00000140	0.00000396	0.00001082	0.00005253	0.00007898
608	NPL-SUB-131	Fabaceae	Astragalus	membranaceus	Root	0.00000212	0.00000331	0.00000116	0.00000212	0.00000059	0.00000115	0.00000152	0.00000281	0.00000181	0.00000061	0.00000041	0.00000244	0.00000080	0.00000058	0.00000078	0.00000092	0.00000205	0.00000998	0.00000120	0.00000060	0.00000270	0.00004911	0.00000069	0.00000053	0.00000145	0.00000177	0.00000169	0.00000179	0.00006161	0.00002986	0.00000061	0.00000060	0.00000134	0.00000077	0.00000581	0.00000165	0.00000867	0.00000325	0.00051271	0.00000079	0.00000222	0.00000993	0.00004889	0.00007620
609	NPL-SUB-132	Fabaceae	Astragalus	membranaceus	Root	0.00000341	0.00000458	0.00000376	0.00000530	0.00000487	0.00000211	0.00000607	0.00000436	0.00000338	0.00000353	0.00000364	0.00000265	0.00000243	0.00000258	0.00000248	0.00000405	0.00000098	0.00000448	0.00000276	0.00000170	0.00000746	0.00008454	0.00000195	0.00000092	0.00000217	0.00000205	0.00000856	0.00000251	0.00011341	0.00004020	0.00000194	0.00000118	0.00000340	0.00000200	0.00000359	0.00000495	0.00001077	0.00000383	0.00024586	0.00000140	0.00000286	0.00000696	0.00008419	0.00011604
610	NPL-SUB-133	Fabaceae	Astragalus	membranaceus	Root	0.00000461	0.00000420	0.00000235	0.00000704	0.00000346	0.00000537	0.00000472	0.00000715	0.00000184	0.00000596	0.00000292	0.00000502	0.00000394	0.00000273	0.00000396	0.00000435	0.00000273	0.00000594	0.00000344	0.00000321	0.00000789	0.00008213	0.00000368	0.00000184	0.00000100	0.00000471	0.00001126	0.00000367	0.00010186	0.00004373	0.00000424	0.00000297	0.00000511	0.00000116	0.00000342	0.00000652	0.00000918	0.00000509	0.00024804	0.00000207	0.00000157	0.00000969	0.00008248	0.00011067
611	NPL-SUB-134	Fabaceae	Astragalus	membranaceus	Root	0.00000185	0.00000552	0.00000532	0.00000304	0.00000217	0.00000391	0.00000335	0.00000309	0.00000597	0.00000742	0.00000294	0.00000414	0.00000377	0.00000182	0.00000108	0.00000218	0.00000232	0.00000600	0.00000336	0.00000289	0.00000577	0.00007635	0.00000210	0.00000049	0.00000147	0.00000198	0.00000588	0.00000178	0.00010606	0.00004027	0.00000185	0.00000144	0.00000502	0.00000135	0.00000469	0.00000333	0.00000827	0.00000400	0.00024553	0.00000159	0.00000246	0.00000614	0.00007957	0.00010710
612	NPL-SUB-135	Fabaceae	Astragalus	membranaceus	Root	0.00001062	0.00000342	0.00000342	0.00000855	0.00000234	0.00000322	0.00000630	0.00000541	0.00000568	0.00000747	0.00000834	0.00000781	0.00000557	0.00000551	0.00000554	0.00000302	0.00000624	0.00000605	0.00000400	0.00000259	0.00000819	0.00008289	0.00000391	0.00000306	0.00000427	0.00000258	0.00001337	0.00000294	0.00010595	0.00004837	0.00000543	0.00000411	0.00000302	0.00000201	0.00000365	0.00000640	0.00001302	0.00000365	0.00025154	0.00000369	0.00000630	0.00000786	0.00008496	0.00011831
613	NPL-SUB-136	Fabaceae	Astragalus	membranaceus	Root	0.00000458	0.00000386	0.00000168	0.00000448	0.00000257	0.00000485	0.00000545	0.00000683	0.00000352	0.00000471	0.00000512	0.00000271	0.00000368	0.00000532	0.00000278	0.00000303	0.00000334	0.00000359	0.00000404	0.00000440	0.00000438	0.00008032	0.00000241	0.00000224	0.00000227	0.00000040	0.00000684	0.00000176	0.00010656	0.00004549	0.00000136	0.00000432	0.00000344	0.00000203	0.00000643	0.00000528	0.00001129	0.00000320	0.00051562	0.00000067	0.00000101	0.00000697	0.00008243	0.00010960
614	NPL-SUB-137	Fabaceae	Astragalus	membranaceus	Root	0.00000494	0.00000399	0.00000576	0.00000465	0.00000361	0.00000323	0.00000421	0.00000421	0.00000406	0.00000099	0.00000809	0.00000329	0.00000350	0.00000273	0.00000288	0.00000332	0.00000631	0.00000706	0.00000218	0.00000230	0.00000674	0.00007691	0.00000174	0.00000366	0.00000236	0.00000340	0.00000880	0.00000577	0.00011033	0.00004383	0.00000406	0.00000259	0.00000533	0.00000057	0.00000652	0.00000556	0.00000514	0.00000400	0.00025334	0.00000274	0.00000347	0.00000919	0.00008698	0.00011362
615	NPL-SUB-138	Fabaceae	Astragalus	membranaceus	Root	0.00000481	0.00000271	0.00000280	0.00000314	0.00000277	0.00000571	0.00000447	0.00000473	0.00000328	0.00000395	0.00000208	0.00000298	0.00000322	0.00000541	0.00000130	0.00000410	0.00000461	0.00000365	0.00000164	0.00000197	0.00000586	0.00007425	0.00000219	0.00000228	0.00000121	0.00000294	0.00000904	0.00000472	0.00010389	0.00003575	0.00000208	0.00000091	0.00000427	0.00000064	0.00000252	0.00000474	0.00001193	0.00000461	0.00029231	0.00000596	0.00000446	0.00002115	0.00007573	0.00010312
616	NPL-SUB-139	Fabaceae	Astragalus	membranaceus	Root	0.00000580	0.00000631	0.00000411	0.00000875	0.00000854	0.00000546	0.00000604	0.00000689	0.00000527	0.00000405	0.00000582	0.00000484	0.00000582	0.00000491	0.00000775	0.00000746	0.00000553	0.00000449	0.00000671	0.00000324	0.00000637	0.00008058	0.00000543	0.00000519	0.00000347	0.00000549	0.00001234	0.00000333	0.00011329	0.00004612	0.00000359	0.00000279	0.00000778	0.00000251	0.00000348	0.00000983	0.00001371	0.00000945	0.00027818	0.00001193	0.00001256	0.00002707	0.00008047	0.00011193
617	NPL-SUB-140	Fabaceae	Astragalus	membranaceus	Root	0.00000628	0.00000427	0.00000883	0.00000401	0.00000391	0.00000668	0.00000385	0.00000231	0.00000424	0.00000560	0.00000285	0.00000391	0.00000283	0.00000539	0.00000515	0.00000677	0.00000677	0.00001088	0.00000564	0.00000122	0.00000726	0.00007645	0.00000370	0.00000173	0.00000420	0.00000241	0.00001821	0.00000584	0.00010760	0.00004219	0.00000325	0.00000510	0.00000828	0.00000194	0.00000595	0.00001115	0.00001644	0.00001134	0.00027050	0.00001468	0.00002000	0.00003271	0.00008514	0.00012444
618	NPL-SUB-141	Fabaceae	Astragalus	membranaceus	Root	0.00000227	0.00000338	0.00000560	0.00000458	0.00000402	0.00000321	0.00000458	0.00000329	0.00000395	0.00000407	0.00000310	0.00000423	0.00000164	0.00000452	0.00000522	0.00000369	0.00000766	0.00000501	0.00000368	0.00000142	0.00000587	0.00007127	0.00000394	0.00000218	0.00000365	0.00000314	0.00001383	0.00000231	0.00010477	0.00003870	0.00000228	0.00000193	0.00001020	0.00000185	0.00000424	0.00000964	0.00001132	0.00000775	0.00026088	0.00001024	0.00001777	0.00003006	0.00008419	0.00012837
619	NPL-SUB-142	Fabaceae	Astragalus	membranaceus	Root	0.00000758	0.00000724	0.00000777	0.00000657	0.00000756	0.00000547	0.00000504	0.00000336	0.00000271	0.00000740	0.00000668	0.00000366	0.00000425	0.00000296	0.00000302	0.00000378	0.00000356	0.00000800	0.00000364	0.00000334	0.00000819	0.00007171	0.00000450	0.00000144	0.00000256	0.00000227	0.00000606	0.00000315	0.00009102	0.00003890	0.00000186	0.00000138	0.00000881	0.00000119	0.00000129	0.00000493	0.00000919	0.00000351	0.00025987	0.00000881	0.00000830	0.00002758	0.00007218	0.00011464
620	NPL-SUB-143	Fabaceae	Astragalus	membranaceus	Root	0.00000297	0.00000477	0.00000178	0.00000209	0.00000229	0.00000195	0.00000139	0.00000135	0.00000227	0.00000136	0.00000209	0.00000110	0.00000158	0.00000200	0.00000404	0.00000281	0.00000553	0.00000394	0.00000230	0.00000121	0.00000636	0.00007195	0.00000214	0.00000127	0.00000049	0.00000150	0.00001259	0.00000163	0.00009731	0.00004242	0.00000248	0.00000077	0.00000874	0.00000113	0.00000403	0.00001549	0.00001320	0.00000664	0.00026929	0.00001019	0.00001252	0.00002295	0.00007722	0.00012367
621	NPL-SUB-144	Zingiberaceae	Zingiber	officinale	Root	0.00001713	0.00002716	0.00002739	0.00010816	0.00001720	0.00001537	0.00003041	0.00006640	0.00006795	0.00001733	0.00002347	0.00001791	0.00001504	0.00001768	0.00004759	0.00004563	0.00010800	0.00010914	0.00005383	0.00000789	0.00001737	0.00002193	0.00002383	0.00000952	0.00000954	0.00001109	0.00002410	0.00001189	0.00000994	0.00001178	0.00001139	0.00000681	0.00001232	0.00000264	0.00000954	0.00000544	0.00000476	0.00000234	0.00162611	0.00010879	0.00003335	0.00003308	0.00001905	0.00000648
622	NPL-SUB-145	Acoraceae	Acorus	tatarinowii	Root	0.00001671	0.00001576	0.00001087	0.00001429	0.00001357	0.00001773	0.00003399	0.00001759	0.00002622	0.00001208	0.00002008	0.00002169	0.00003972	0.00003284	0.00001632	0.00002686	0.00004173	0.00004431	0.00001285	0.00001048	0.00000829	0.00000671	0.00000644	0.00001072	0.00001042	0.00000762	0.00001133	0.00000961	0.00000332	0.00000819	0.00000260	0.00000458	0.00000493	0.00000163	0.00000850	0.00000171	0.00000129	0.00000267	0.00096886	0.00004744	0.00000598	0.00001080	0.00000518	0.00000354
623	NPL-SUB-146	Polygonaceae	Rheum	palmatum	Root	0.00000785	0.00000491	0.00000352	0.00000544	0.00000148	0.00000358	0.00000352	0.00000177	0.00000271	0.00000497	0.00000561	0.00000276	0.00000231	0.00000507	0.00000161	0.00000426	0.00000400	0.00000695	0.00000197	0.00000090	0.00000141	0.00000556	0.00000104	0.00000305	0.00000226	0.00000232	0.00000533	0.00000321	0.00000247	0.00000440	0.00000273	0.00000372	0.00000833	0.00000718	0.00002576	0.00000629	0.00000978	0.00000597	0.00047200	0.00000757	0.00000340	0.00000360	0.00000387	0.00000376
624	NPL-SUB-147	Ranunculaceae	Cimicifuga	foetida	Root	0.00003259	0.00003003	0.00002111	0.00003601	0.00002752	0.00001304	0.00003036	0.00009618	0.00005496	0.00004301	0.00002997	0.00001526	0.00002267	0.00002510	0.00001694	0.00001702	0.00001895	0.00001800	0.00001089	0.00001825	0.00001116	0.00004315	0.00001097	0.00000660	0.00000634	0.00000850	0.00001463	0.00000872	0.00003002	0.00002340	0.00000605	0.00000373	0.00000574	0.00000661	0.00001124	0.00001198	0.00000933	0.00000329	0.00115725	0.00005055	0.00000273	0.00001268	0.00000658	0.00000754
625	NPL-SUB-148	Lauraceae	Cinnamomum	cassia	Brench	0.00010370	0.00029454	0.00005750	0.00008375	0.00007316	0.00008760	0.00027945	0.00024431	0.00013718	0.01056373	0.01089453	0.00125000	0.00009730	0.00018161	0.00006276	0.00012377	0.00003283	0.00005128	0.00004360	0.00005335	0.00005162	0.00004794	0.00006163	0.00003355	0.00004832	0.00003513	0.00007362	0.00003417	0.00004419	0.00003150	0.00005643	0.00002575	0.00001868	0.00003028	0.00004175	0.00001144	0.00003847	0.00003500	0.00361957	0.00005377	0.00001815	0.00003802	0.00003986	0.00003377
626	NPL-SUB-149	Fabaceae	Glycyrrhiza	uralensis	Root	0.00000645	0.00000487	0.00000543	0.00000385	0.00000424	0.00000469	0.00000327	0.00000401	0.00000519	0.00000296	0.00000464	0.00000373	0.00000111	0.00000467	0.00000261	0.00000630	0.00000585	0.00000402	0.00000331	0.00000179	0.00000339	0.00016222	0.00000269	0.00000235	0.00000205	0.00000286	0.00000387	0.00000434	0.00019739	0.00012759	0.00000113	0.00000149	0.00000244	0.00000142	0.00000706	0.00000368	0.00001320	0.00000955	0.00030907	0.00001402	0.00000600	0.00001462	0.00009707	0.00013194
627	NPL-SUB-150	Rosaceae	Prunus	persica	Seed	0.00006803	0.00004102	0.00003887	0.00005044	0.00005150	0.00005852	0.00006308	0.00005571	0.00004882	0.00007031	0.00007012	0.00005699	0.00005946	0.00007278	0.00005741	0.00006435	0.00009397	0.00008021	0.00005707	0.00005349	0.00005721	0.00004440	0.00008055	0.00004708	0.00006881	0.00005091	0.00005657	0.00004134	0.00005097	0.00003863	0.00003752	0.00004928	0.00005107	0.00002948	0.00003908	0.00005596	0.00006920	0.00004924	0.00216657	0.00006886	0.00006726	0.00006516	0.00005168	0.00006136
628	NPL-SUB-151	Zingiberaceae	Alpinia	officinarum	Root	0.00002407	0.00002309	0.00001869	0.00001800	0.00001083	0.00001630	0.00002005	0.00003401	0.00003686	0.00001710	0.00002258	0.00001179	0.00001374	0.00002873	0.00001496	0.00002355	0.00001994	0.00004553	0.00003940	0.00001423	0.00000642	0.00001313	0.00000468	0.00001278	0.00002335	0.00001925	0.00001474	0.00002273	0.00001139	0.00000820	0.00001451	0.00003662	0.00002123	0.00000850	0.00008785	0.00001915	0.00004216	0.00001475	0.00044920	0.00002520	0.00001565	0.00001946	0.00000672	0.00003382
629	NPL-SUB-152	Acoraceae	Acorus	calamus	Root	0.00002403	0.00001181	0.00001502	0.00000906	0.00001552	0.00002016	0.00001179	0.00001933	0.00002570	0.00001782	0.00001125	0.00002318	0.00002092	0.00001764	0.00001510	0.00003012	0.00002346	0.00002908	0.00001223	0.00001146	0.00001696	0.00001939	0.00001207	0.00001029	0.00000507	0.00001405	0.00001727	0.00001465	0.00001290	0.00000841	0.00000759	0.00000786	0.00000548	0.00000626	0.00000823	0.00001375	0.00001516	0.00001332	0.00029936	0.00000489	0.00001273	0.00001827	0.00001575	0.00002055
630	NPL-SUB-153	Zingiberaceae	Curcuma	longa	Root	0.00001317	0.00001846	0.00001939	0.00001121	0.00001782	0.00001244	0.00004577	0.00013036	0.00002659	0.00000967	0.00001251	0.00000730	0.00001129	0.00001727	0.00008169	0.00003740	0.00004074	0.00003649	0.00000936	0.00001506	0.00001427	0.00000369	0.00001205	0.00000318	0.00001946	0.00000855	0.00003056	0.00000932	0.00000596	0.00001567	0.00001909	0.00006444	0.00001318	0.00001077	0.00005908	0.00004299	0.00007833	0.00004746	0.00123712	0.00007702	0.00002782	0.00001135	0.00001424	0.00002381
631	NPL-SUB-154	Zingiberaceae	Curcuma	aromatica	Root	0.00003883	0.00005744	0.00007399	0.00006753	0.00005007	0.00003711	0.00004673	0.00004685	0.00003212	0.00004856	0.00006183	0.00006506	0.00003929	0.00004299	0.00004831	0.00006799	0.00012749	0.00006419	0.00004071	0.00005864	0.00007357	0.00005880	0.00011800	0.00004093	0.00011074	0.00004475	0.00008753	0.00003493	0.00006530	0.00002653	0.00005643	0.00004884	0.00005364	0.00003789	0.00004174	0.00007486	0.00010911	0.00002472	0.00100091	0.00008461	0.00005490	0.00006088	0.00008089	0.00008098
632	NPL-SUB-155	Zingiberaceae	Zingiber	officinale	Root	0.00003014	0.00002310	0.00004714	0.00049111	0.00001185	0.00000776	0.00001898	0.00018442	0.00017136	0.00001276	0.00000516	0.00000830	0.00000906	0.00002006	0.00002423	0.00001801	0.00006118	0.00012953	0.00004171	0.00000923	0.00001383	0.00001118	0.00002759	0.00001014	0.00003188	0.00001491	0.00002379	0.00001997	0.00000966	0.00001289	0.00001446	0.00002246	0.00000882	0.00000628	0.00001620	0.00001484	0.00000815	0.00001180	0.00068558	0.00000542	0.00001218	0.00001113	0.00001131	0.00000733
633	NPL-SUB-156	Zingiberaceae	Alpinia	officinarum	Root	0.00003471	0.00002576	0.00002661	0.00002590	0.00002739	0.00002537	0.00002354	0.00002901	0.00004306	0.00002453	0.00001989	0.00002110	0.00002790	0.00001648	0.00002522	0.00002793	0.00002142	0.00002441	0.00002926	0.00002645	0.00001528	0.00002279	0.00001343	0.00001638	0.00001248	0.00001708	0.00001162	0.00001123	0.00001082	0.00001474	0.00001450	0.00008495	0.00001890	0.00000782	0.00010720	0.00000797	0.00005601	0.00001006	0.00024052	0.00001111	0.00000548	0.00001440	0.00000957	0.00001566
634	NPL-SUB-157	Acoraceae	Acorus	calamus	Root	0.00000416	0.00001014	0.00000630	0.00000604	0.00000669	0.00001248	0.00001084	0.00001394	0.00001525	0.00000823	0.00000614	0.00001116	0.00000737	0.00000972	0.00000669	0.00000896	0.00001864	0.00001239	0.00000521	0.00000714	0.00000543	0.00000410	0.00000314	0.00000282	0.00000646	0.00000324	0.00000594	0.00000198	0.00000384	0.00000615	0.00000213	0.00000317	0.00000363	0.00000599	0.00000801	0.00000593	0.00000620	0.00000931	0.00006017	0.00000741	0.00000651	0.00002464	0.00000279	0.00000931
635	NPL-SUB-158	Zingiberaceae	Curcuma	longa	Root	0.00001933	0.00001675	0.00002864	0.00002848	0.00001913	0.00002563	0.00006895	0.00009271	0.00001643	0.00003521	0.00003401	0.00002003	0.00002341	0.00002509	0.00006163	0.00003311	0.00008136	0.00002391	0.00001546	0.00002007	0.00001102	0.00001341	0.00007079	0.00001271	0.00006356	0.00002390	0.00002725	0.00000831	0.00001567	0.00000917	0.00000873	0.00001291	0.00001953	0.00001813	0.00001464	0.00001617	0.00001753	0.00001560	0.00076237	0.00001453	0.00000407	0.00001570	0.00001461	0.00001999
636	NPL-SUB-159	Zingiberaceae	Curcuma	aromatica	Root	0.00005165	0.00005100	0.00005601	0.00005076	0.00006891	0.00004984	0.00007902	0.00005772	0.00002603	0.00004200	0.00003673	0.00002369	0.00005178	0.00004151	0.00004245	0.00006402	0.00009901	0.00005152	0.00005327	0.00004446	0.00003631	0.00003695	0.00007990	0.00002993	0.00005489	0.00004190	0.00006797	0.00003281	0.00002876	0.00003395	0.00004637	0.00002123	0.00003967	0.00004321	0.00004963	0.00005040	0.00006918	0.00003330	0.00128498	0.00003396	0.00003288	0.00003676	0.00003940	0.00003686
637	NPL-SUB-160	Zingiberaceae	Zingiber	officinale	Root	0.00001105	0.00001590	0.00001448	0.00031198	0.00000887	0.00000558	0.00000957	0.00010810	0.00010718	0.00000682	0.00000629	0.00000570	0.00000979	0.00001307	0.00001721	0.00001690	0.00005349	0.00008967	0.00008154	0.00000793	0.00000483	0.00000945	0.00001799	0.00000508	0.00002256	0.00000280	0.00001320	0.00000771	0.00000320	0.00000457	0.00000405	0.00000504	0.00000908	0.00000425	0.00000594	0.00000607	0.00000898	0.00000898	0.00021417	0.00000467	0.00000938	0.00001706	0.00000965	0.00001749
638	NPL-SUB-161	Zingiberaceae	Alpinia	officinarum	Root	0.00002564	0.00002114	0.00002328	0.00003074	0.00001935	0.00002017	0.00001777	0.00004137	0.00005837	0.00002620	0.00001762	0.00002657	0.00002183	0.00003438	0.00002391	0.00002015	0.00002166	0.00004645	0.00001979	0.00000906	0.00001751	0.00000756	0.00002374	0.00001204	0.00001513	0.00001763	0.00001712	0.00001634	0.00000938	0.00001551	0.00001921	0.00005511	0.00001091	0.00001948	0.00004132	0.00000947	0.00003912	0.00001316	0.00039018	0.00001647	0.00001382	0.00001596	0.00000698	0.00004283
639	NPL-SUB-162	Acoraceae	Acorus	calamus	Root	0.00002865	0.00002775	0.00003009	0.00003186	0.00002746	0.00005041	0.00002229	0.00003362	0.00003566	0.00002039	0.00000724	0.00001819	0.00002868	0.00002377	0.00002334	0.00001602	0.00002297	0.00004206	0.00001532	0.00001358	0.00001406	0.00001668	0.00001312	0.00002595	0.00001498	0.00002138	0.00001265	0.00001496	0.00001546	0.00000723	0.00000984	0.00001269	0.00001204	0.00000536	0.00001257	0.00001155	0.00001039	0.00000647	0.00047022	0.00001613	0.00000802	0.00004576	0.00001037	0.00000493
640	NPL-SUB-163	Zingiberaceae	Curcuma	longa	Root	0.00001816	0.00002611	0.00002972	0.00001759	0.00002374	0.00001751	0.00006586	0.00008171	0.00002073	0.00002488	0.00002093	0.00001306	0.00002039	0.00002018	0.00003071	0.00002918	0.00002306	0.00001653	0.00001063	0.00000638	0.00000948	0.00001117	0.00001358	0.00000510	0.00000922	0.00000381	0.00001277	0.00000417	0.00001523	0.00000846	0.00000448	0.00000501	0.00000715	0.00000412	0.00000925	0.00000809	0.00000279	0.00000520	0.00079879	0.00000971	0.00000709	0.00000418	0.00000248	0.00000580
641	NPL-SUB-164	Zingiberaceae	Curcuma	aromatica	Root	0.00007711	0.00005373	0.00004888	0.00002139	0.00005824	0.00003666	0.00004864	0.00007117	0.00004448	0.00005640	0.00006340	0.00003581	0.00004344	0.00006067	0.00006704	0.00005227	0.00010289	0.00006370	0.00004789	0.00007124	0.00004522	0.00005011	0.00009324	0.00004124	0.00012487	0.00005195	0.00007090	0.00002826	0.00004310	0.00005844	0.00004397	0.00004075	0.00004877	0.00002233	0.00003609	0.00003604	0.00006257	0.00004767	0.00129551	0.00005307	0.00005570	0.00006623	0.00004061	0.00008117
642	NPL-SUB-165	Zingiberaceae	Zingiber	officinale	Root	0.00002496	0.00002013	0.00001400	0.00014448	0.00001516	0.00002106	0.00003721	0.00007050	0.00006907	0.00002235	0.00001302	0.00002118	0.00002453	0.00002064	0.00002705	0.00003606	0.00009476	0.00008781	0.00005420	0.00002217	0.00002728	0.00004069	0.00007644	0.00001001	0.00007443	0.00001927	0.00003110	0.00002387	0.00001270	0.00001103	0.00000839	0.00001749	0.00002379	0.00000996	0.00001804	0.00002526	0.00001519	0.00001620	0.00089427	0.00001184	0.00001027	0.00002064	0.00002649	0.00001813
643	NPL-SUB-166	Zingiberaceae	Alpinia	officinarum	Root	0.00000697	0.00001842	0.00001106	0.00000993	0.00001515	0.00000930	0.00001593	0.00001567	0.00000857	0.00000752	0.00001036	0.00001496	0.00000694	0.00001572	0.00001161	0.00000686	0.00000719	0.00001269	0.00000510	0.00000547	0.00000540	0.00001243	0.00000925	0.00000946	0.00000389	0.00001056	0.00000709	0.00000246	0.00000460	0.00000848	0.00000557	0.00000595	0.00000604	0.00000407	0.00000216	0.00000321	0.00000694	0.00000713	0.00000465	0.00001401	0.00000720	0.00001980	0.00000737	0.00001714
644	NPL-SUB-167	Acoraceae	Acorus	calamus	Root	0.00000890	0.00000656	0.00000637	0.00000894	0.00000931	0.00000608	0.00000600	0.00001255	0.00000933	0.00000451	0.00000609	0.00000527	0.00001211	0.00001838	0.00000717	0.00000987	0.00000720	0.00000919	0.00000435	0.00000552	0.00000269	0.00000262	0.00000397	0.00000181	0.00000169	0.00000297	0.00000666	0.00000557	0.00000118	0.00000169	0.00000339	0.00000254	0.00000395	0.00000172	0.00000664	0.00000259	0.00000470	0.00000290	0.00010145	0.00000254	0.00000299	0.00001258	0.00000116	0.00000510
645	NPL-SUB-168	Zingiberaceae	Curcuma	longa	Root	0.00001244	0.00002201	0.00002381	0.00001579	0.00001647	0.00000894	0.00006764	0.00009176	0.00002856	0.00001499	0.00001909	0.00001428	0.00001730	0.00001512	0.00003312	0.00002605	0.00006174	0.00003038	0.00000916	0.00001610	0.00000667	0.00000884	0.00004552	0.00000771	0.00004737	0.00000767	0.00000873	0.00000394	0.00000506	0.00001090	0.00000250	0.00000420	0.00000604	0.00000443	0.00000272	0.00000606	0.00000419	0.00000046	0.00067109	0.00000933	0.00000252	0.00000289	0.00000268	0.00000261
646	NPL-SUB-169	Zingiberaceae	Curcuma	aromatica	Root	0.00003758	0.00004075	0.00004174	0.00004137	0.00004626	0.00006008	0.00005166	0.00004091	0.00005642	0.00004622	0.00005909	0.00004753	0.00006601	0.00005353	0.00003827	0.00005725	0.00009225	0.00007048	0.00006584	0.00004498	0.00005004	0.00005112	0.00010821	0.00005038	0.00006524	0.00006151	0.00004299	0.00003647	0.00006386	0.00002677	0.00003971	0.00003055	0.00004911	0.00002867	0.00005281	0.00005689	0.00008312	0.00005208	0.00100463	0.00006242	0.00004053	0.00007482	0.00003423	0.00005645
647	NPL-SUB-170	Zingiberaceae	Zingiber	officinale	Root	0.00000984	0.00001068	0.00001867	0.00027020	0.00000746	0.00001008	0.00001401	0.00009629	0.00009619	0.00000943	0.00001727	0.00000324	0.00000788	0.00001008	0.00002350	0.00001250	0.00004488	0.00009033	0.00017900	0.00001936	0.00001070	0.00000876	0.00001367	0.00000431	0.00001217	0.00000624	0.00000515	0.00000554	0.00000177	0.00000600	0.00000428	0.00000425	0.00000676	0.00000857	0.00000625	0.00000365	0.00001063	0.00000175	0.00023016	0.00000510	0.00000393	0.00000758	0.00000694	0.00000887
648	NPL-SUB-171	Zingiberaceae	Alpinia	officinarum	Root	0.00001409	0.00001908	0.00001355	0.00001729	0.00001808	0.00001501	0.00001076	0.00002785	0.00001474	0.00001437	0.00000806	0.00000840	0.00001022	0.00001196	0.00001315	0.00000907	0.00001107	0.00002934	0.00001697	0.00002088	0.00000756	0.00001661	0.00001246	0.00001177	0.00001009	0.00000947	0.00001856	0.00001480	0.00001246	0.00001384	0.00001366	0.00003309	0.00001124	0.00000918	0.00007547	0.00000780	0.00004079	0.00000694	0.00022001	0.00001747	0.00000635	0.00001383	0.00000464	0.00003192
649	NPL-SUB-172	Acoraceae	Acorus	calamus	Root	0.00001427	0.00001301	0.00001049	0.00001290	0.00001006	0.00001156	0.00001415	0.00001253	0.00001514	0.00000795	0.00001423	0.00000858	0.00001340	0.00001438	0.00001227	0.00000855	0.00001930	0.00001367	0.00000935	0.00000591	0.00000966	0.00000371	0.00000728	0.00000667	0.00000642	0.00000828	0.00001165	0.00000578	0.00000813	0.00000855	0.00000766	0.00000268	0.00000745	0.00000564	0.00001296	0.00000218	0.00000351	0.00000357	0.00005364	0.00000634	0.00000804	0.00002909	0.00000351	0.00000907
650	NPL-SUB-173	Zingiberaceae	Curcuma	longa	Root	0.00001518	0.00000926	0.00003023	0.00002097	0.00001133	0.00000916	0.00010803	0.00011589	0.00000809	0.00001506	0.00000244	0.00000630	0.00001342	0.00003443	0.00009356	0.00006119	0.00005097	0.00002393	0.00000652	0.00000993	0.00000883	0.00000923	0.00003987	0.00000716	0.00003635	0.00001277	0.00001107	0.00001019	0.00000602	0.00000713	0.00000801	0.00000639	0.00000716	0.00000747	0.00000814	0.00001274	0.00001570	0.00001463	0.00066991	0.00000905	0.00000880	0.00002378	0.00000723	0.00002273
651	NPL-SUB-174	Zingiberaceae	Curcuma	aromatica	Root	0.00002311	0.00004216	0.00004595	0.00005602	0.00006735	0.00006666	0.00004901	0.00005886	0.00005172	0.00005276	0.00005881	0.00003859	0.00006149	0.00005356	0.00007334	0.00004439	0.00012842	0.00008271	0.00008171	0.00006776	0.00006474	0.00006223	0.00008541	0.00006234	0.00009290	0.00004765	0.00009432	0.00005510	0.00006102	0.00003901	0.00004813	0.00004804	0.00005753	0.00003830	0.00005380	0.00007241	0.00010059	0.00007875	0.00103731	0.00006335	0.00003581	0.00004914	0.00005064	0.00003488
652	NPL-SUB-175	Zingiberaceae	Zingiber	officinale	Root	0.00001411	0.00001447	0.00001639	0.00021337	0.00000708	0.00000568	0.00001524	0.00010152	0.00008701	0.00001146	0.00000911	0.00000861	0.00000627	0.00000943	0.00001140	0.00001740	0.00005314	0.00007927	0.00004606	0.00000567	0.00001035	0.00000685	0.00003100	0.00000677	0.00002213	0.00000790	0.00001172	0.00000076	0.00000495	0.00001000	0.00000292	0.00000828	0.00000747	0.00000815	0.00000867	0.00001206	0.00001436	0.00000913	0.00031063	0.00000949	0.00000646	0.00002563	0.00000575	0.00001430
653	NPL-HBD-332	Apiaceae	Angelica	gigas	Root	0.00001007	0.00000892	0.00000795	0.00000856	0.00001162	0.00000889	0.00000476	0.00000572	0.00000970	0.00000937	0.00001423	0.00001343	0.00000702	0.00001735	0.00000861	0.00000575	0.00002761	0.00000651	0.00001158	0.00000438	0.00000704	0.00000673	0.00003218	0.00000310	0.00002778	0.00000221	0.00000597	0.00000557	0.00000503	0.00000275	0.00000121	0.00000268	0.00000133	0.00000254	0.00000224	0.00000757	0.00003276	0.00000758	0.00010005	0.00000088	0.00000238	0.00000315	0.00000777	0.00000625
654	NPL-HBD-334	Apiaceae	Angelica	gigas	Root	0.00002559	0.00001509	0.00001018	0.00001087	0.00000961	0.00000706	0.00001076	0.00001555	0.00001815	0.00001589	0.00001238	0.00001630	0.00001275	0.00001533	0.00000510	0.00000986	0.00003542	0.00001449	0.00001235	0.00000675	0.00000884	0.00000376	0.00002070	0.00000530	0.00002062	0.00000797	0.00000405	0.00000376	0.00000283	0.00000135	0.00000039	0.00000244	0.00000132	0.00000126	0.00000073	0.00000140	0.00002691	0.00000507	0.00010173	0.00000104	0.00000017	0.00000242	0.00000083	0.00000065
655	NPL-HBD-336	Apiaceae	Angelica	gigas	Stems and Leaves	0.00001890	0.00001763	0.00001864	0.00001735	0.00001903	0.00001033	0.00001641	0.00001418	0.00001736	0.00001608	0.00001335	0.00001711	0.00002176	0.00002228	0.00001333	0.00002331	0.00002117	0.00001827	0.00004164	0.00004357	0.00000197	0.00000380	0.00000353	0.00000272	0.00000122	0.00000147	0.00000262	0.00000235	0.00000078	0.00000036	0.00000002	0.00000000	0.00000001	0.00000026	0.00000000	0.00000000	0.00000000	0.00000040	0.00000000	0.00012305	0.00000000	0.00000000	0.00000000	0.00000020
656	NPL-HBD-338	Apiaceae	Angelica	gigas	Stems and Leaves	0.00002411	0.00003422	0.00002460	0.00002085	0.00002154	0.00002217	0.00002122	0.00002789	0.00002757	0.00002164	0.00001736	0.00002104	0.00001510	0.00002622	0.00002885	0.00001688	0.00004157	0.00001957	0.00001369	0.00001493	0.00000719	0.00000239	0.00001843	0.00000220	0.00001340	0.00000261	0.00000162	0.00000467	0.00000000	0.00000010	0.00000006	0.00000000	0.00000000	0.00000000	0.00000000	0.00000000	0.00000227	0.00000001	0.00010675	0.00000003	0.00000000	0.00000000	0.00000000	0.00000000
[truncated: 442 more columns]

## Sheet: Variable Information
The 1st Variable IDs	The 2nd row Variables IDs	The source of variables
a1-a243	10.0 - 0.03 (1H NMR chemical shift)	Variables obtained from the specatra measured in CH3OH-d4-KH2PO4 buffer (pH 6.0) ( 1:1, v/v)
b1 - b243	10.0 - 0.03 (1H NMR chemical shift)	Variables obtained from the specatra measured in CH3OH-d4
