# Supplementary material for: Leveraging Metabolic Similarity in a ¹H NMR Database of Medicinal Plants: A Macroscopic Approach to Advancing Pharmacognostic Insights
Source: Research Square preprint supplement (doi:10.21203/rs.3.rs-6765662/v1), 2025-06-27
Supplement: Supplementary file 4 [file d15a96f1d3bf1892a92cc549.docx]

**Table 1.** Distance to the model (DModX) values of *Angelica* species in the model of soft independent model of class analogy (SIMCA) for the *Angelica* class and the distance of non-*Angelica* samples having DModX < 1.27235 (Dcrit = 0.05).

| **No.** | **Sample code** | **Species** | **Genus** | **M2. DModX [2] (Norm), Weighted residuals** |
| --- | --- | --- | --- | --- |
| 1 | NPL-KHU-022 | *Angelica* | *gigas* | 0.572366 |
| 2 | NPL-KHU-066 | *Angelica* | *acutiloba* | 0.615103 |
| 3 | NPL-KIOM-041 | *Angelica* | *gigas* | 0.571566 |
| 4 | NPL-KIOM-080 | *Angelica* | *dahurica* | 1.07631 |
| 5 | NPL-KIOM-081 | *Angelica* | *dahurica* | 0.670917 |
| 6 | NPL-KIOM-168 | *Angelica* | *acutiloba* | 0.525833 |
| 7 | NPL-KIOM-169 | *Angelica* | *acutiloba* | 0.68044 |
| 8 | NPL-KIOM-180 | *Angelica* | *decursiva* | 1.28192 |
| 9 | NPL-NET-034 | *Angelica* | *dahurica* | 0.565141 |
| 10 | NPL-NET-036 | *Angelica* | *gigas* | 0.540228 |
| 11 | NPL-NET-037 | *Angelica* | *acutiloba* | 0.579614 |
| 12 | NPL-NET-038 | *Angelica* | *sinensis* | 0.552658 |
| 13 | NPL-NET-040 | *Angelica* | *gigas* | 0.656834 |
| 14 | NPL-NET-041 | *Angelica* | *gigas* | 0.472327 |
| 15 | NPL-NPL-044 | *Angelica* | *acutiloba* | 2.33752 |
| 16 | NPL-RDA-008 | *Angelica* | *gigas* | 0.570281 |
| 17 | NPL-SUB-015 | *Angelica* | *sinensis* | 0.491321 |
| 18 | NPL-SUB-020 | *Angelica* | *pubescens* | 1.57637 |
| 19 | NPL-SUB-035 | *Angelica* | *dahurica* | 1.29916 |
| 20 | NPL-HBD-332 | *Angelica* | *gigas* | 0.935537 |
| 21 | NPL-HBD-334 | *Angelica* | *gigas* | 0.961212 |
| 22 | NPL-HBD-336 | *Angelica* | *gigas* | 1.67758 |
| 23 | NPL-HBD-338 | *Angelica* | *gigas* | 1.11894 |

Outliers are marked and defined as samples with DModX values exceeding the 95% confidence threshold (Dcrit = 0.05) based on SIMCA analysis (DModX > 1.27235).
